# Supplementary material for: An umpolung strategy for chemically selective intermolecular cross-enolate-type coupling of N-alkenoxypyridinium salts with aldehydes
Source: Royal Society of Chemistry journal article supplement (doi:10.1039/d3cc00422h), 2023-01-01

# **An Umpolung Strategy for Chemically Selective Intermolecular Cross-Enolate-Type Coupling of N-Alkenoxypyridiniums with Aldehydes**

Guichao Dong <sup>1#</sup>, Mengfei Jiang <sup>1#</sup>, Nan Wu <sup>1#\*</sup>, Shengxiang Zhang <sup>1</sup>, Lei  
Huang <sup>1</sup>, Huilong Zhu <sup>1</sup>, & Zhou Xu <sup>1\*</sup>

<sup>1</sup>*Jiangsu Key Laboratory of New Drug Research and Clinical Pharmacy, School of Pharmacy, Xuzhou Medical  
University, Xuzhou 221004, Jiangsu, China*

## **Supporting Information**

**Table of Contents:**

|                                                                                       |     |
|---------------------------------------------------------------------------------------|-----|
| 1. General information .....                                                          | S2  |
| 2. Synthesis of substrates .....                                                      | S2  |
| 3. Experimental procedures and characterization of products .....                     | S14 |
| 4. Evaluation of proliferation inhibitory activity of the compounds on tumor cells... | S27 |
| 5. Reference .....                                                                    | S28 |
| 6. NMR spectra .....                                                                  | S29 |

## 1. General procedures

All reagents and solvents were purchased from commercial sources and used without further purification unless otherwise stated. All reactions were monitored by thin-layer chromatography (TLC). All reactions were carried out in air unless otherwise stated. Column chromatography was performed on silica gel (200 - 300 mesh) and visualized with ultraviolet light. Ethyl acetate and petroleum ether were used as eluents.  $^1\text{H}$ ,  $^{13}\text{C}$  and  $^{19}\text{F}$  spectra were recorded at room temperature on a JEOL ECZ400 with MDB as an internal standard and  $\text{CDCl}_3$  as solvent. Multiplicity abbreviated as: s, singlet; d, doublet; t, triplet; q, quartet; se-Pt, Septet; m, multiplet; Fourier transform infrared spectra (FT-IR) were recorded on Agilent Technologies Cary 630 instrument. HRMS analyses were made by means of ESI-TOF. Melting points were measured on micro melting point apparatus and uncorrected.

## 2. Synthesis of substrates

### 2.1. Synthesis of S1ah-S1al <sup>[1]</sup>

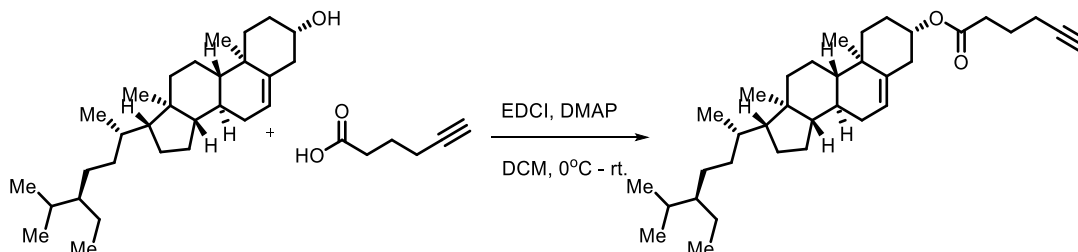

To a solution of Beta-Sitosterol (5.0 mmol, 2.07 g) and 5-Hexynoic Acid (5.0 mmol, 1 equiv) in DCM (20.0 mL) was added EDCI (6.0 mmol, 1.2 equiv, 1.15 g) and DMAP (0.5 mmol, 0.1 equiv, 0.061 g) at 0 °C. After addition, the mixture was stirred at room temperature until TLC indicating completion. The reaction was quenched with  $\text{H}_2\text{O}$  and extracted with  $\text{CH}_2\text{Cl}_2$  ( $2 \times 20$  mL). The combined organic layers were dried over anhydrous  $\text{Na}_2\text{SO}_4$  and concentrated in vacuo. The crude product was purified by flash chromatography (silica gel, 50:1 petroleum ether/EtOAc) to afford 4-acetylbenzoate **S1ah** - **S1al**.

**(3*S*,8*S*,9*S*,10*R*,13*R*,14*S*,17*R*)-17-((2*S*,5*R*)-5-Ethyl-6-methylheptan-2-yl)-10,13-dimethyl-2,3,4,7,8,9,10,11,12,13,14,15,16,17-tetradecahydro-1*H*-cyclopenta[*a*]phenanthren-3-yl-hex-5-ynoate (S1ah)**

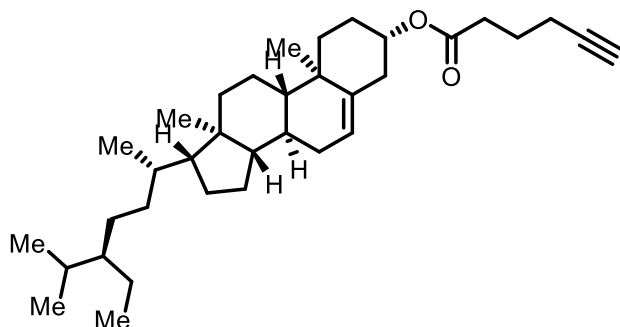

White solid after purification by column chromatography (petroleum ether/ethyl acetate = 50/1); mp: 155.0 - 155.6 °C, 2.5 g, 98% yield. <sup>1</sup>H NMR (400 MHz, Chloroform-*d*) δ 5.37 (d, *J* = 4.1 Hz, 1H), 4.68 - 4.54 (m, 1H), 2.42 (t, *J* = 7.3 Hz, 2H), 2.35 - 2.22 (m, 4H), 2.03 - 1.91 (m, 2H), 1.91 - 1.79 (m, 4H),

1.63 - 1.44 (m, 7H), 1.42 (s, 3H), 1.33 - 1.21 (m, 4H), 1.19 - 1.07 (m, 4H), 1.01 (s, 3H), 0.94 - 0.89 (m, 4H), 0.86 (t, *J* = 5.5 Hz, 4H), 0.85 - 0.79 (m, 10H), 0.67 (s, 3H). <sup>13</sup>C NMR (100 MHz, Chloroform-*d*) δ 172.5, 139.6, 122.7, 83.4, 76.7, 73.9, 69.0, 56.6, 55.9, 49.9, 45.8, 42.3, 39.7, 38.1, 36.9, 36.6, 36.1, 33.9, 33.3, 31.9, 31.8, 29.1, 28.2, 27.8, 25.9, 24.3, 23.7, 23.0, 20.9, 19.8, 19.3, 18.9, 18.7, 17.8, 11.9, 11.8. IR (KBr, cm<sup>-1</sup>): 3263, 2954, 2870, 1720, 1465, 1381, 1323, 1265, 1195, 1153, 1010, 921, 879, 802, 736, 682, 536. HRMS (ESI<sup>+</sup>) *m/z*: [M+H]<sup>+</sup> calcd for C<sub>35</sub>H<sub>57</sub>O<sub>2</sub><sup>+</sup>: 509.4353; found: 509.4344.

**(4*S*,5'*R*,6a*S*,8a*S*,8b*R*,9*S*,10*R*,11a*S*,12a*S*,12b*R*)-5',6a,8a,9-Tetramethyl-2a,3,3',4,4',5,5',6,6a,6b,6',7,8,8a,8b,9,11a,12,12a,12b-icosahydrospiro[naphtho[2',1':4,5]indeno[2,1-b]furan-10,2'-pyran]-4-yl-hex-5-ynoate (S1ai)**

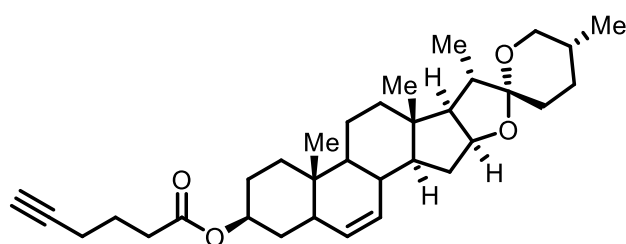

White solid after purification by column chromatography (petroleum ether/ethyl acetate = 50/1); mp: 167.5 - 168.2 °C, 2.5 g, 97% yield. <sup>1</sup>H NMR (400 MHz, Chloroform-*d*) δ 5.37 (d, *J* = 4.6 Hz, 1H), 4.68 - 4.54 (m, 1H), 4.41 (q, *J* = 7.5 Hz, 1H), 3.47 (dd, *J* = 11.0, 4.1 Hz, 1H), 3.37 (t, *J* = 10.7 Hz, 1H), 2.42 (t, *J* = 7.5 Hz, 2H), 2.35 - 2.21 (m, 4H), 2.05 - 1.93 (m, 3H), 1.91 - 1.81 (m, 5H), 1.81 - 1.69 (m, 2H), 1.66 - 1.55 (m, 7H), 1.55 - 1.36 (m, 4H), 1.28 (td, *J* = 12.7, 6.3 Hz, 1H), 1.23 - 1.05 (m, 3H), 1.03 (s, 3H), 0.97 (d, *J* = 6.9 Hz, 3H), 0.79 (d, *J* = 4.6 Hz, 6H).

<sup>13</sup>C NMR (100 MHz, Chloroform-*d*) δ 172.3, 139.6, 122.3, 109.2, 83.3, 80.7, 73.8, 69.1, 66.7, 61.9, 56.3, 49.8, 41.5, 40.2, 39.6, 38.0, 36.9, 36.6, 33.2, 31.9, 31.8, 31.3, 30.2, 28.7, 27.7, 23.6, 20.7, 19.3, 17.8, 17.1, 16.2, 14.5. IR (KBr, cm<sup>-1</sup>): 2931, 2885, 1724, 1450, 1377, 1246, 1165, 1049, 1006, 983, 960, 918, 898, 864, 840, 798, 702, 597, 536. HRMS (ESI<sup>+</sup>) *m/z*: [M+H]<sup>+</sup> calcd for C<sub>33</sub>H<sub>49</sub>O<sub>4</sub><sup>+</sup>: 509.3625; found: 509.3647.

**(3*R*,4*S*,5*R*,6*R*)-3,4,5-5-Tris(benzyloxy)-6-((benzyloxy)methyl)tetrahydro-2*H*-pyran-2-yl-hex-5-ynoate (S1aj)**

White solid after purification by column chromatography (petroleum ether/ethyl acetate

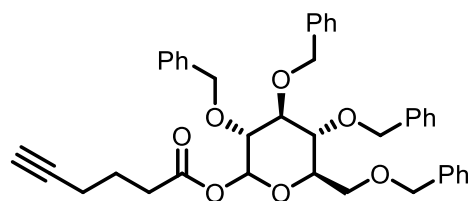

= 20/1); mp: 65.3 – 67.5 °C, 3054.10 g, 96% yield. <sup>1</sup>H NMR (400 MHz, Chloroform-*d*) δ 7.29 (q, *J* = 2.4 Hz, 20H), 7.16 (q, *J* = 2.7 Hz, 2H), 6.46 – 5.60 (m, 1H), 4.95 (dd, *J* = 24.5, 10.7 Hz, 1H), 4.89 – 4.81 (m, 2H), 4.79 (d, *J* = 4.1 Hz, 1H), 4.75 – 4.60 (m, 2H), 4.58 – 4.47 (m, 2H), 4.00 – 3.86 (m, 1H), 3.82 – 3.69 (m, 4H), 3.69–3.56 (m, 1H), 2.62 – 2.44 (m, 1H), 2.27 (tt, *J* = 7.0, 2.2 Hz, 2H), 1.99 (q, *J* = 2.6 Hz, 1H), 1.92 – 1.81 (m, 2H), 0.94 – 0.84 (2H). <sup>13</sup>C NMR (100 MHz, Chloroform-*d*) δ 207.6, 202.8, 171.7, 166.2, 165.8, 165.3, 138.0, 133.8, 133.7, 133.5, 130.0, 129.9, 129.8, 129.6, 129.5, 129.2, 129.0, 128.8, 128.7, 128.7, 128.6, 128.5, 126.9, 94.8, 82.9, 82.8, 77.2, 70.8, 70.7, 64.1, 60.5, 48.4, 41.3, 40.8, 34.6, 32.6, 21.2, 18.3, 14.3. IR (KBr, cm<sup>-1</sup>): 3290, 3030, 2912, 2858, 1743, 1608, 1585, 1496, 1444, 1359, 1205, 1076, 732, 700, 636, 459. HRMS (ESI<sup>+</sup>) *m/z*: [M+Na]<sup>+</sup> calcd for C<sub>40</sub>H<sub>42</sub>O<sub>7</sub>Na<sup>+</sup>: 657.2823; found: 657.2810.

**(2*R*,3*R*,4*R*,5*R*)-5-((Benzyloxy)methyl)-3-(hex-5-ynoxy)tetrahydrofuran-2,4-diyl-dibenzoate (S1ak)**

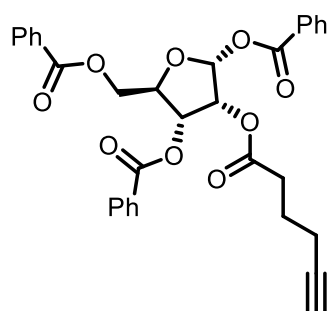

Transparent viscous liquid after purification by column chromatography (petroleum ether/ethyl acetate = 20/1); 2.7 g, 96% yield. <sup>1</sup>H NMR (400 MHz, Chloroform-*d*) δ 8.12 – 8.07 (m, 6H), 7.67 – 7.57 (m, 3H), 7.52 – 7.37 (m, 6H), 6.81 (d, *J* = 4.6 Hz, 1H), 5.79 (dd, *J* = 6.4, 2.3 Hz, 1H), 5.57 (dd, *J* = 6.4, 4.6 Hz, 1H), 4.86 (q, *J* = 2.9 Hz, 1H), 4.72 (dd, *J* = 12.3, 3.2 Hz, 1H), 4.65 – 4.57 (1H), 2.42 (t, *J* = 7.5 Hz, 2H), 2.13 (td, *J* = 7.0, 2.6 Hz, 2H), 1.80 (t, *J* = 2.5 Hz, 1H), 1.78 – 1.68 (m, 2H). <sup>13</sup>C NMR (100 MHz, Chloroform-*d*) δ 171.7, 166.2, 165.8, 165.3, 133.8, 133.6, 133.5, 130.1, 130.0, 129.9, 129.8, 129.7, 129.5, 129.3, 128.7, 128.7, 128.5, 94.8, 83.0, 82.9, 77.1, 70.9, 70.7, 69.3, 64.1, 32.3, 23.3, 17.7. IR (KBr, cm<sup>-1</sup>): 3277, 3047, 2927, 2360, 1724, 1598, 1450, 1315, 1265, 1114, 1022, 707. HRMS (ESI<sup>+</sup>) *m/z*: [M+Na]<sup>+</sup> calcd for C<sub>32</sub>H<sub>28</sub>O<sub>9</sub>Na<sup>+</sup>: 579.1626; found: 579.1617.

**(3*aS*,4*R*,6*R*,6*aS*)-6-((*R*)-2,2-Dimethyl-1,3-dioxolan-4-yl)-2,2-dimethyltetrahydrofuro[3,4-*d*][1,3]dioxol-4-yl-hex-5-ynoate (S1al)**

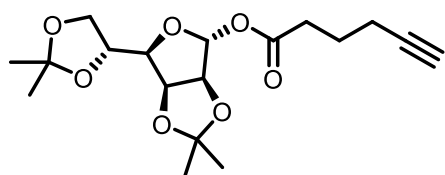

Transparent viscous liquid after purification by column chromatography (petroleum ether/ethyl acetate = 20/1); 1.7 g, 97% yield. <sup>1</sup>H NMR (400 MHz, Chloroform-*d*) δ 6.14 (s, 1H), 4.85 (q, *J* = 3.2 Hz, 1H), 4.69 (d, *J* = 5.9 Hz, 1H), 4.43 – 4.36 (m, 1H), 4.13 – 4.06 (1H), 4.02 (td, *J* = 7.9, 3.7 Hz, 2H), 2.46 (t, *J* = 7.5 Hz, 2H), 2.27 (td, *J* = 6.9, 2.7 Hz, 2H), 1.99 (t, *J* = 2.7 Hz, 1H), 1.90 – 1.77 (m, 2H), 1.47 (d, *J* = 10.5 Hz, 6H), 1.35 (d, *J* = 13.7 Hz, 6H). <sup>13</sup>C NMR (100 MHz, Chloroform-*d*) δ 171.5, 113.2, 109.3, 100.6, 85.0, 83.0, 82.2, 79.2, 77.0, 72.8, 69.3, 66.8, 32.7, 26.9, 25.9, 25.1, 24.6, 23.1, 17.6. IR (KBr, cm<sup>-1</sup>): 3251, 3010, 2987, 2902, 1743, 1490, 1463, 1280, 1165, 1151, 1120, 1071, 1039, 974, 846, 707, 680, 563, 516, 468, 418. HRMS (ESI<sup>+</sup>) *m/z*: [M+Na]<sup>+</sup> calcd for C<sub>18</sub>H<sub>26</sub>O<sub>7</sub>Na<sup>+</sup>: 377.1751; found: 377.1569.

## 2.2. General procedure for B [2]

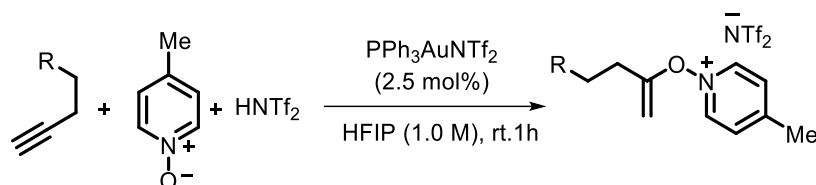

p-Methylpyridine oxide and  $\text{Tf}_2\text{NH}$  were premixed in a molar ratio of 1.2/1.1 which was then stored in a vial and used for reaction directly.  $\text{PPh}_3\text{AuNTf}_2$  (5.5 mg, 0.025 equiv.) was added into a mixture of pent-4-yn-1-ylbenzene (43.8 mg, 0.3 mmol), the above premixed salt (126.9 mg, 1.2 equiv, in the p-methylpyridine oxide) and HFIP (0.3 mL) in a vial at room temperature. The reaction mixture was then stirred at room temperature, and the progress of the reaction was monitored by TLC ( $\text{CH}_2\text{Cl}_2/\text{MeOH} = 10/1$ ). After the reaction was completed, the N-alkenoxypyridinium salt was purified by column chromatography on silica with greater than 90 % isolated yield ( $\text{CH}_2\text{Cl}_2/\text{MeOH} = 100/1$ ).

### 4-Methyl-1-((5-phenylpent-1-en-2-yl)oxy)pyridin-1-ium bis((trifluoromethyl)sulfonyl)amide (2a)

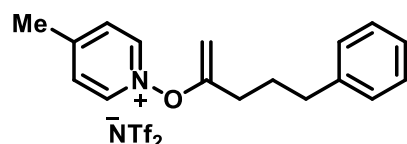

Yellow viscous liquid after purification by column chromatography ( $\text{CH}_2\text{Cl}_2/\text{MeOH} = 100/1$ ); 1040.1 mg, 97% yield.  $^1\text{H}$  NMR (400 MHz, Chloroform-*d*)  $\delta$  8.55 – 8.48 (m, 2H), 7.96 (d,  $J = 6.7$  Hz, 2H), 7.28 (t,  $J = 7.4$  Hz, 2H), 7.19 (dt,  $J = 9.8, 3.0$  Hz, 3H), 4.46 (d,  $J = 5.4$  Hz, 1H), 3.68 (d,  $J = 5.5$  Hz, 1H), 2.69 (d,  $J = 5.5$  Hz, 5H), 2.38 (t,  $J = 7.7$  Hz, 2H), 1.96 (p,  $J = 7.6$  Hz, 2H).  $^{13}\text{C}$  NMR (100 MHz, Chloroform-*d*)  $\delta$  165.2, 161.4, 141.1, 140.5, 130.4, 128.4, 128.4, 126.0, 121.3, 118.1, 88.9, 34.7, 30.3, 27.7, 22.2.  $^{19}\text{F}$  NMR (376 MHz, Chloroform-*d*)  $\delta$  -78.83. IR (KBr,  $\text{cm}^{-1}$ ): 3113, 2939, 1716, 1666, 1639, 1624, 1496, 1454, 1350, 1192, 1138, 1056, 786, 740, 651, 617, 570, 513. HRMS (ESI<sup>+</sup>)  $m/z$ :  $[\text{M}]^+$  calcd for  $\text{C}_{17}\text{H}_{20}\text{NO}^+$ : 254.1539 ; found: 254.1540.

### 1-(Hex-1-en-2-yloxy)-4-methylpyridin-1-ium bis((trifluoromethyl)sulfonyl)amide (2b)

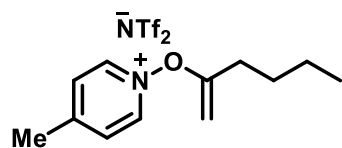

Yellow viscous liquid after purification by column chromatography ( $\text{CH}_2\text{Cl}_2/\text{MeOH} = 100/1$ ); 910.8 mg, 97% yield.  $^1\text{H}$  NMR (400 MHz, Chloroform-*d*)  $\delta$  8.60 (d,  $J = 6.9$  Hz, 2H), 7.98 (d,  $J = 6.4$  Hz, 2H), 4.42 (d,  $J = 5.5$  Hz, 1H), 3.64 (d,  $J = 5.5$  Hz, 1H), 2.69 (s, 3H), 2.33 (t,  $J = 7.8$  Hz, 2H), 1.65 – 1.48 (m, 2H), 1.36 (q,  $J = 7.5$  Hz, 2H), 0.89 (t,  $J = 7.3$  Hz, 3H).  $^{13}\text{C}$  NMR (100 MHz, Chloroform-*d*)  $\delta$  165.7, 161.3, 140.6, 130.3, 121.2, 118.0, 88.2, 30.4, 28.3, 22.1, 21.7, 13.3.  $^{19}\text{F}$  NMR (376 MHz, Chloroform-*d*)  $\delta$  -78.89. IR (KBr,  $\text{cm}^{-1}$ ): 3116, 2962, 2935, 2873, 1666, 1624, 1496, 1462, 1350, 1138, 1056, 871, 852, 786, 740, 655, 617, 570, 513. HRMS (ESI<sup>+</sup>)  $m/z$ :  $[\text{M}]^+$  calcd for  $\text{C}_{12}\text{H}_{18}\text{NO}^+$ : 192.1383; found: 192.1391.

### 4-Methyl-1-(oct-1-en-2-yloxy)pyridine-1-ium bis((trifluoromethyl)sulfonyl)amide (2c)

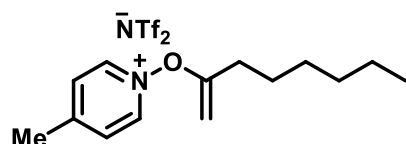

Yellow viscous liquid after purification by column chromatography ( $\text{CH}_2\text{Cl}_2/\text{MeOH} = 100/1$ ); 960.0 mg, 96% yield.  $^1\text{H}$  NMR (400 MHz, Chloroform-*d*)  $\delta$  8.66 – 8.59 (m, 2H), 8.03 (d,  $J = 6.7$  Hz, 2H), 4.47 (d,  $J = 5.4$  Hz, 1H), 3.69 (d,  $J = 5.3$  Hz, 1H), 2.74 (s, 3H), 2.36 (t,  $J = 7.7$  Hz, 2H), 1.61 (p,  $J = 7.9, 7.4$  Hz, 2H), 1.44 – 1.20 (m, 6H), 0.93 – 0.82 (m, 3H).  $^{13}\text{C}$  NMR (100 MHz, Chloroform-*d*)  $\delta$  165.8, 161.3, 140.6, 130.4, 121.2, 118.0, 88.3, 31.1, 30.7, 28.3, 26.2, 22.2, 22.1, 13.8.  $^{19}\text{F}$  NMR (376 MHz, Chloroform-*d*)  $\delta$  -78.83. IR (KBr,  $\text{cm}^{-1}$ ): 2927, 2854, 1666, 1624, 1496, 1458, 1354, 1192, 1138, 1056, 848, 786, 740, 690, 651, 617, 570, 513. HRMS (ESI<sup>+</sup>)  $m/z$ :  $[\text{M}]^+$  calcd for  $\text{C}_{14}\text{H}_{22}\text{NO}^+$ : 220.1696; found: 220.1670.

**1-((Hexadec-1-en-2-yl)oxy)-4-methylpyridin-1-ium bis((trifluoromethyl)sulfonyl)amide (2d)**

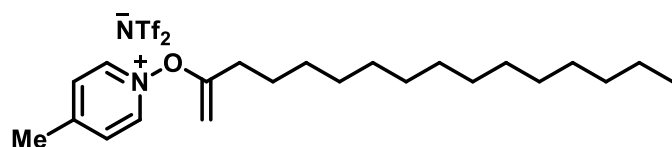

Yellow viscous liquid after purification by column chromatography ( $\text{CH}_2\text{Cl}_2/\text{MeOH} = 100/1$ ); 1164.1 mg, 95% yield.  $^1\text{H}$  NMR (400 MHz, Chloroform-*d*)  $\delta$  8.62 (d,  $J = 7.1$  Hz, 2H), 8.03 (d,  $J = 6.4$  Hz, 2H), 4.50 – 4.39 (d,  $J = 5.5$  Hz, 1H), 3.67 (d,  $J = 5.5$  Hz, 1H), 2.80 – 2.67 (s, 3H), 2.35 (t,  $J = 7.8$  Hz, 2H), 1.67 – 1.52 (m, 2H), 1.34 – 1.14 (m, 18H), 0.84 (t,  $J = 6.9$  Hz, 3H).  $^{13}\text{C}$  NMR (100 MHz, Chloroform-*d*)  $\delta$  166.0, 161.5, 140.7, 134.0, 130.6, 88.5, 31.9, 30.9, 29.7, 29.6, 29.6, 29.4, 29.3, 29.2, 28.9, 26.5, 22.7, 22.4, 14.1.  $^{19}\text{F}$  NMR (376 MHz, Chloroform-*d*)  $\delta$  -78.89. IR (KBr,  $\text{cm}^{-1}$ ): 3116, 2927, 2854, 1666, 1624, 1496, 1462, 1350, 1192, 1138, 1060, 848, 786, 740, 655, 617, 570, 513. HRMS (ESI<sup>+</sup>)  $m/z$ :  $[\text{M}]^+$  calcd for  $\text{C}_{22}\text{H}_{38}\text{NO}^+$ : 332.2948; found: 332.2954.

**1-(((6-Methoxy-6-oxohex-1-en-2-yl)oxy)-4-methylpyridin-1-ium bis((trifluoromethyl)sulfonyl)amide (2e)**

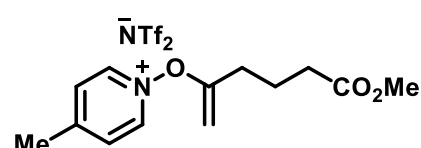

Yellow viscous liquid after purification by column chromatography ( $\text{CH}_2\text{Cl}_2/\text{MeOH} = 100/1$ ); 996.7 mg, 96% yield.  $^1\text{H}$  NMR (400 MHz, Chloroform-*d*)  $\delta$  8.77 – 8.64 (m, 2H), 8.01 (d,  $J = 6.6$  Hz, 2H), 4.51 – 4.45 (m, 1H), 3.74 – 3.66 (m, 1H), 3.64 (d,  $J = 0.9$  Hz, 3H), 2.73 (s, 3H), 2.52 – 2.30 (m, 4H), 1.96 (h,  $J = 7.5$  Hz, 2H).  $^{13}\text{C}$  NMR (100 MHz, Chloroform-*d*)  $\delta$  173.5, 164.5, 161.6, 140.7, 130.5, 121.3, 118.1, 89.1, 51.6, 32.6, 30.4, 22.3, 21.3.  $^{19}\text{F}$  NMR (376 MHz, Chloroform-*d*)  $\delta$  -78.92. IR (KBr,  $\text{cm}^{-1}$ ): 3116, 2958, 1732, 1666, 1624, 1496, 1458, 1438, 1350, 1192, 1138, 1056, 848, 786, 740, 651, 617, 570, 513. HRMS (ESI<sup>+</sup>)  $m/z$ :  $[\text{M}]^+$  calcd for  $\text{C}_{13}\text{H}_{18}\text{NO}_3^+$ : 236.1281; found: 236.1284.

**1-(((5-Chloropent-1-en-2-yl)oxy)-4-methylpyridin-1-ium bis((trifluoromethyl)sulfonyl)amide (2f)**

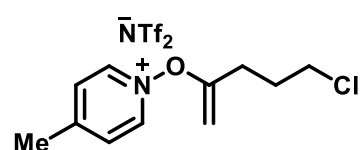

Yellow viscous liquid after purification by column chromatography ( $\text{CH}_2\text{Cl}_2/\text{MeOH} = 100/1$ ); 956.0 mg, 97% yield.  $^1\text{H}$  NMR (400 MHz, Chloroform-*d*)  $\delta$  8.67 (d,  $J = 5.8$  Hz, 2H), 7.99 (d,  $J = 5.5$  Hz, 2H), 4.53 (d,  $J = 5.4$  Hz,

1H), 3.73 (d,  $J = 5.5$  Hz, 1H), 3.62 (t,  $J = 6.1$  Hz, 2H), 2.73 (s, 3H), 2.57 (t,  $J = 7.4$  Hz, 2H), 2.09 (h,  $J = 7.1, 6.6$  Hz, 2H).  $^{13}\text{C}$  NMR (100 MHz, Chloroform- $d$ )  $\delta$  164.2, 161.7, 140.8, 130.6, 90.0, 43.6, 29.1, 28.4, 22.6.  $^{19}\text{F}$  NMR (376 MHz, Chloroform- $d$ )  $\delta$  -78.92. IR (KBr,  $\text{cm}^{-1}$ ): 3116, 1666, 1624, 1496, 1350, 1192, 1138, 1056, 786, 740, 617, 570, 513. HRMS (ESI $^{+}$ )  $m/z$ :  $[\text{M}]^{+}$  calcd for  $\text{C}_{11}\text{H}_{15}\text{ClNO}^{+}$ : 212.0837; found: 212.0847.

**1-((6-Chlorohex-1-en-2-yl)oxy)-4-methylpyridin-1-ium bis((trifluoromethyl)sulfonyl)amide (2g)**

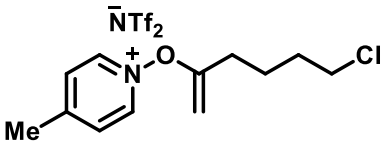 Yellow viscous liquid after purification by column chromatography ( $\text{CH}_2\text{Cl}_2/\text{MeOH} = 100/1$ ); 993.3 mg, 98% yield.  $^1\text{H}$  NMR (400 MHz, Chloroform- $d$ )  $\delta$  8.66 (d,  $J = 5.8$  Hz, 2H), 8.01 (d,  $J = 5.8$  Hz, 2H), 4.50 (dd,  $J = 5.5, 0.9$  Hz, 1H), 3.71 (d,  $J = 5.5$  Hz, 1H), 3.57 (t,  $J = 6.1$  Hz, 2H), 2.73 (s, 3H), 2.42 (t,  $J = 7.3$  Hz, 2H), 1.87 – 1.71 (m, 4H).  $^{13}\text{C}$  NMR (101 MHz, Chloroform- $d$ )  $\delta$  165.0, 161.5, 140.7, 130.4, 121.2, 118.1, 88.9, 44.4, 31.3, 30.1, 23.5, 22.3.  $^{19}\text{F}$  NMR (376 MHz, Chloroform- $d$ )  $\delta$  -78.89. IR (KBr,  $\text{cm}^{-1}$ ): 3116, 2877, 1666, 1624, 1496, 1458, 1350, 1192, 1138, 1056, 852, 786, 740, 617, 570, 513. HRMS (ESI $^{+}$ )  $m/z$ :  $[\text{M}]^{+}$  calcd for  $\text{C}_{12}\text{H}_{17}\text{ClNO}^{+}$ : 226.0993; found: 226.1003.

**1-((6-Cyanohept-1-en-2-yl)oxy)-4-methylpyridin-1-ium bis((trifluoromethyl)sulfonyl)amide (2h)**

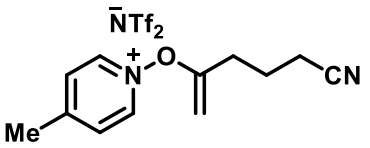 Yellow viscous liquid after purification by column chromatography ( $\text{CH}_2\text{Cl}_2/\text{MeOH} = 100/1$ ); 918.5 mg, 95% yield.  $^1\text{H}$  NMR (400 MHz, Methanol- $d_4$ )  $\delta$  9.08 (d,  $J = 7.3$  Hz, 2H), 8.08 (d,  $J = 4.6$  Hz, 2H), 4.82 (s, 2H), 4.63 (d,  $J = 5.5$  Hz, 1H), 3.86 (d,  $J = 5.5$  Hz, 1H), 3.37 – 3.20 (1H), 2.67 – 2.49 (4H), 2.13 – 1.96 (m, 2H).  $^{13}\text{C}$  NMR (100 MHz, Methanol- $d_4$ )  $\delta$  165.2, 163.3, 142.5, 131.3, 122.8, 120.7, 119.6, 89.9, 31.2, 23.7, 22.3, 16.6.  $^{19}\text{F}$  NMR (376 MHz, Methanol- $d_4$ )  $\delta$  -78.98. IR (KBr,  $\text{cm}^{-1}$ ): 3116, 2947, 1666, 1624, 1496, 1458, 1350, 1192, 1138, 1056, 867, 786, 740, 651, 617, 570, 513. HRMS (ESI $^{+}$ )  $m/z$ :  $[\text{M}]^{+}$  calcd for  $\text{C}_{12}\text{H}_{15}\text{N}_2\text{O}^{+}$ : 203.1179; found: 203.1180.

**4-Methyl-1-((4-phenylbut-1-en-2-yl)oxy)pyridin-1-ium bis((trifluoromethyl)sulfonyl)amide (2i)**

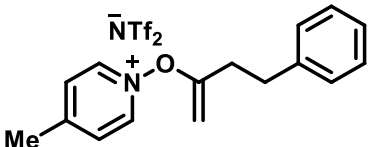 Yellow viscous liquid after purification by column chromatography ( $\text{CH}_2\text{Cl}_2/\text{MeOH} = 100/1$ ); 1019.4 mg, 98% yield.  $^1\text{H}$  NMR (400 MHz, Chloroform- $d$ )  $\delta$  8.54 – 8.39 (m, 2H), 8.05 – 7.91 (m, 2H), 7.40 – 7.28 (m, 2H), 7.26 (td,  $J = 5.2, 2.8$  Hz, 3H), 4.50 (d,  $J = 5.5$  Hz, 1H), 3.69 (d,  $J = 5.5$  Hz, 1H), 2.97 (p,  $J = 7.5$  Hz, 2H), 2.78 – 2.63 (m, 1H), 2.72 (s, 4H).  $^{13}\text{C}$  NMR (100 MHz, Chloroform- $d$ )  $\delta$  164.6, 161.5, 140.6, 139.5, 130.4, 128.6, 128.5, 126.6, 121.3, 118.1, 89.3, 32.8, 32.4, 22.3.  $^{19}\text{F}$  NMR (376 MHz, Chloroform- $d$ )  $\delta$  -78.79. IR (KBr,  $\text{cm}^{-1}$ ): 3113, 1666, 1624, 1496, 1454, 1350, 1192, 1056, 786, 740, 702, 651, 617, 570, 513. HRMS (ESI $^{+}$ )  $m/z$ :  $[\text{M}]^{+}$  calcd for  $\text{C}_{16}\text{H}_{18}\text{NO}^{+}$ : 240.1383; found: 240.1387.

**1-((6-(Benzyloxy)-6-oxohex-1-en-2-yl)oxy)-4-methylpyridin-1-ium bis((trifluoromethyl)sulfonyl)amide (2j)**



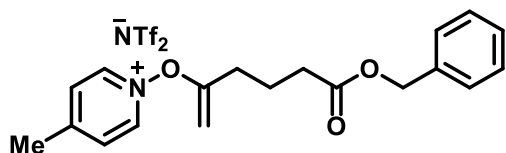

Yellow viscous liquid after purification by column chromatography ( $\text{CH}_2\text{Cl}_2/\text{MeOH} = 100/1$ ); 1125.2 mg, 95% yield.  $^1\text{H}$  NMR (400 MHz, Chloroform-*d*)  $\delta$  8.70 – 8.64 (m, 2H), 8.00 (d,  $J = 6.6$  Hz, 2H), 7.36 – 7.24 (m, 3H), 5.07 (s, 2H), 4.48 (d,  $J = 5.5$  Hz, 1H), 3.70 (d,  $J = 5.5$  Hz, 1H), 2.75 (s, 3H), 2.46 (dt,  $J = 17.5, 7.2$  Hz, 5H), 1.99 (p,  $J = 7.3$  Hz, 2H).  $^{13}\text{C}$  NMR (100 MHz, Chloroform-*d*)  $\delta$  172.8, 164.4, 161.6, 140.7, 134.3, 134.1, 130.5, 129.6, 128.7, 121.3, 118.1, 89.3, 65.6, 32.8, 30.6, 22.5, 21.3.  $^{19}\text{F}$  NMR (376 MHz, Chloroform-*d*)  $\delta$  -78.83. IR (KBr,  $\text{cm}^{-1}$ ): 3113, 2951, 1732, 1666, 1624, 1496, 1458, 1350, 1192, 1138, 1056, 887, 848, 786, 740, 698, 651, 617, 570, 513. HRMS (ESI<sup>+</sup>)  $m/z$ :  $[\text{M}]^+$  calcd for  $\text{C}_{19}\text{H}_{22}\text{NO}_3^+$ : 312.1594; found: 312.1592.

**1-((6-((4-Chlorobenzyl)oxy)-6-oxohex-1-en-2-yl)oxy)-4-methylpyridin-1-ium bis((trifluoromethyl)sulfonyl)amide (2k)**

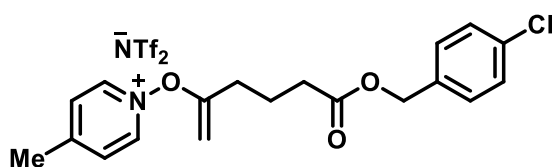

Yellow viscous liquid after purification by column chromatography ( $\text{CH}_2\text{Cl}_2/\text{MeOH} = 100/1$ ); 1191.1 mg, 95% yield.  $^1\text{H}$  NMR (400 MHz, Chloroform-*d*)  $\delta$  8.67 – 8.53 (m, 2H), 7.99 – 7.88 (m, 2H), 7.28 (s, 2H), 7.35 – 7.19 (m, 2H), 5.06 (s, 2H), 4.40 (d,  $J = 5.5$  Hz, 1H), 3.60 (d,  $J = 5.5$  Hz, 1H), 2.66 (s, 3H), 2.52 – 2.26 (m, 5H), 1.94 (h,  $J = 7.4$  Hz, 2H).  $^{13}\text{C}$  NMR (100 MHz, Chloroform-*d*)  $\delta$  172.8, 164.4, 161.6, 140.7, 134.3, 134.1, 130.5, 129.6, 128.7, 89.3, 65.6, 32.8, 30.6, 22.5, 21.3.  $^{19}\text{F}$  NMR (376 MHz, Chloroform-*d*)  $\delta$  -78.83. IR (KBr,  $\text{cm}^{-1}$ ): 3113, 2947, 1723, 1666, 1624, 1492, 1458, 1350, 1188, 1056, 740, 617, 570, 513. HRMS (ESI<sup>+</sup>)  $m/z$ :  $[\text{M}]^+$  calcd for  $\text{C}_{19}\text{H}_{21}\text{ClNO}_3^+$ : 346.1204; found: 346.1199.

**4-Methyl-1-((6-((4-methylbenzyl)oxy)-6-oxohex-1-en-2-yl)oxy)pyridin-1-ium bis((trifluoromethyl)sulfonyl)amide (2l)**

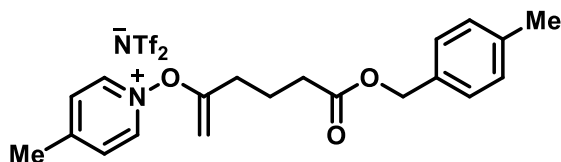

Yellow viscous liquid after purification by column chromatography ( $\text{CH}_2\text{Cl}_2/\text{MeOH} = 100/1$ ); 1164.7 mg, 96% yield.  $^1\text{H}$  NMR (400 MHz, Chloroform-*d*)  $\delta$  8.73 – 8.60 (m, 2H), 8.06 – 7.92 (m, 2H), 7.31 – 7.17 (m, 2H), 7.17 – 7.10 (m, 2H), 7.06 (dd,  $J = 8.3, 5.9$  Hz, 0H), 5.07 (s, 3H), 4.46 (d,  $J = 5.5$  Hz, 1H), 3.67 (d,  $J = 5.5$  Hz, 1H), 2.74 (s, 3H), 2.45 (dt,  $J = 13.3, 7.2$  Hz, 4H), 2.32 (s, 3H), 1.98 (p,  $J = 7.2$  Hz, 2H).  $^{13}\text{C}$  NMR (100 MHz, Chloroform-*d*)  $\delta$  172.9, 164.4, 161.5, 140.7, 138.2, 132.7, 130.5, 129.2, 128.3, 121.3, 118.1, 89.2, 66.4, 32.9, 30.5, 22.4, 21.3, 21.1.  $^{19}\text{F}$  NMR (376 MHz, Chloroform-*d*)  $\delta$  -78.83. IR (KBr,  $\text{cm}^{-1}$ ): 3113, 2951, 1732, 1666, 1624, 1496, 1458, 1354, 1192, 1138, 1056, 844, 810, 740, 617, 570, 513. HRMS (ESI<sup>+</sup>)  $m/z$ :  $[\text{M}]^+$  calcd for  $\text{C}_{20}\text{H}_{24}\text{NO}_3^+$ : 326.1751; found: 326.1747.

**1-((6-(Benzyloxy)hex-1-en-2-yl)oxy)-4-methylpyridin-1-ium bis((trifluoromethyl)sulfonyl)amide (2m)**

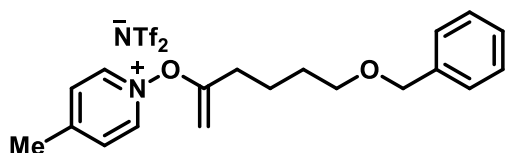

Yellow viscous liquid after purification by column chromatography (CH<sub>2</sub>Cl<sub>2</sub>/ MeOH = 100/1); 1110.7 mg, 96% yield. <sup>1</sup>H NMR (400 MHz, Chloroform-*d*) δ 8.60 (d, *J* = 7.3 Hz, 2H), 7.93 (d, *J* = 7.3 Hz, 2H), 7.33 – 7.19 (m,

4H), 4.46 (d, *J* = 5.5 Hz, 1H), 4.43 (s, 2H), 3.67 (d, *J* = 5.5 Hz, 1H), 3.50 (t, *J* = 5.7 Hz, 2H), 2.69 (s, 3H), 2.38 (t, *J* = 7.1 Hz, 2H), 1.81 – 1.56 (m, 4H). <sup>13</sup>C NMR (100 MHz, Chloroform-*d*) δ 165.4, 161.4, 140.6, 137.0, 133.2, 130.4, 129.1, 128.4, 121.3, 118.1, 88.9, 72.1, 69.8, 53.4, 30.7, 28.6, 23.1, 22.3. <sup>19</sup>F NMR (376 MHz, Chloroform-*d*) δ -78.83. IR (KBr, cm<sup>-1</sup>): 3116, 2939, 2866, 1666, 1624, 1492, 1458, 1350, 1195, 1138, 1056, 848, 813, 740, 651, 617, 570, 513. HRMS (ESI<sup>+</sup>) *m/z*: [M]<sup>+</sup> calcd for C<sub>19</sub>H<sub>24</sub>NO<sub>2</sub><sup>+</sup>: 298.1802; found: 298.1804.

**1-((6-((4-Chlorobenzyl)oxy)hex-1-en-2-yl)oxy)-4-methylpyridin-1-ium bis((trifluoromethyl)sulfonyl)amide (2n)**

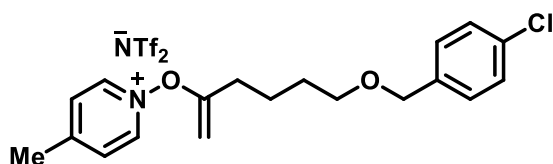

Yellow viscous liquid after purification by column chromatography (CH<sub>2</sub>Cl<sub>2</sub>/ MeOH = 100/1); 1176.9 mg, 96% yield. <sup>1</sup>H NMR (400 MHz, Chloroform-*d*) δ 8.61 – 8.51 (m, 2H), 7.87 (d, *J* = 6.7 Hz,

2H), 7.31 (s, 2H), 7.31 – 7.30 (s, 2H), 4.45 (d, *J* = 10.0 Hz, 3H), 3.67 (d, *J* = 5.4 Hz, 1H), 3.52 (t, *J* = 5.7 Hz, 2H), 2.66 (s, 3H), 2.37 (t, *J* = 7.1 Hz, 2H), 1.79 – 1.66 (m, 4H). <sup>13</sup>C NMR (100 MHz, Chloroform-*d*) δ 165.4, 161.4, 140.7, 136.9, 133.2, 130.4, 129.1, 128.5, 121.3, 118.1, 89.0, 72.2, 69.8, 30.7, 28.6, 23.1, 22.4. <sup>19</sup>F NMR (376 MHz, Chloroform-*d*) δ -78.79. IR (KBr, cm<sup>-1</sup>): 3113, 2939, 2866, 1666, 1624, 1496, 1458, 1354, 1195, 1138, 1056, 852, 786, 740, 651, 617, 570, 513. HRMS (ESI<sup>+</sup>) *m/z*: [M]<sup>+</sup> calcd for C<sub>19</sub>H<sub>23</sub>ClNO<sub>2</sub><sup>+</sup>: 332.1412; found: 332.1416.

**4-Methyl-1-((6-((4-methylbenzyl)oxy)hex-1-en-2-yl)oxy)pyridin-1-ium bis((trifluoromethyl)sulfonyl)amide (2o)**

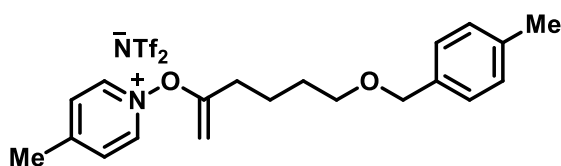

Yellow viscous liquid after purification by column chromatography (CH<sub>2</sub>Cl<sub>2</sub>/ MeOH = 100/1); 1137.8 mg, 96% yield. <sup>1</sup>H NMR (400 MHz, Chloroform-*d*) δ 8.60 (d, *J* = 6.9 Hz, 2H), 7.89 (d, *J* = 6.9

Hz, 2H), 7.23 (d, *J* = 7.8 Hz, 2H), 7.14 (d, *J* = 7.8 Hz, 2H), 4.50 (d, *J* = 5.0 Hz, 1H), 4.45 (s, 2H), 3.77 – 3.71 (1H), 3.53 (t, *J* = 5.7 Hz, 2H), 2.71 (s, 3H), 2.40 (t, *J* = 7.1 Hz, 2H), 2.33 (s, 3H), 1.86 – 1.60 (m, 4H). <sup>13</sup>C NMR (100 MHz, Chloroform-*d*) δ 165.3, 161.3, 140.6, 137.3, 135.2, 130.3, 129.0, 127.9, 121.3, 118.1, 89.0, 72.8, 69.5, 30.7, 28.5, 23.0, 22.2, 21.0. <sup>19</sup>F NMR (376 MHz, Chloroform-*d*) δ -78.83. IR (KBr, cm<sup>-1</sup>): 3113, 2935, 2866, 1666, 1624, 1496, 1458, 1354, 1195, 1138, 1056, 848, 806, 786, 740, 651, 617, 570, 513. HRMS (ESI<sup>+</sup>) *m/z*: [M]<sup>+</sup> calcd for C<sub>20</sub>H<sub>26</sub>NO<sub>2</sub><sup>+</sup>: 312.1958; found: 312.1956.

**1-((6-(((3*S*,8*S*,9*S*,10*R*,13*R*,14*S*,17*R*)-17-((2*S*,5*R*)-5-Ethyl-6-methylheptan-2-yl)-10,13-dimethyl-2,3,4,7,8,9,10,11,12,13,14,15,16,17-tetradecahydro-1*H*-cyclopenta[*a*]phenanthren-3-yl)oxy)-6-oxohex-1-en-2-yl)oxy)-4-methylpyridin-1-**

**ium bis((trifluoromethyl)sulfonyl)amide (2ah)**

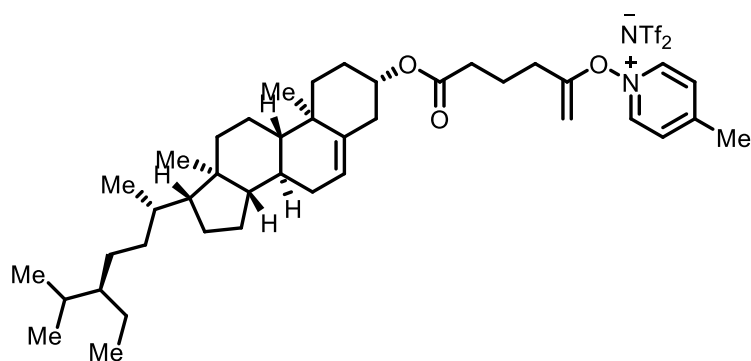

Yellow viscous liquid after purification by column chromatography (CH<sub>2</sub>Cl<sub>2</sub>/MeOH = 100/1); 1.7 g, 92% yield. <sup>1</sup>H NMR (400 MHz, Chloroform-*d*) δ 8.71 (d, *J* = 6.9 Hz, 2H), 8.03 (d, *J* = 6.9 Hz, 2H), 5.29 (s, 1H), 4.59 (t, *J* =

5.0 Hz, 1H), 4.50 (d, *J* = 5.5 Hz, 1H), 3.73 (d, *J* = 5.5 Hz, 1H), 2.75 (s, 3H), 2.42 (dt, *J* = 18.0, 7.3 Hz, 4H), 2.29 (d, *J* = 6.4 Hz, 2H), 2.04 – 1.90 (m, 4H), 1.89 – 1.76 (m, 3H), 1.72–1.39 (m, 7H), 1.37–1.03 (m, 12H), 1.00 (s, 4H), 0.91 (d, *J* = 6.9 Hz, 4H), 0.86–0.73 (m, 10H), 0.65 (d, *J* = 12.8 Hz, 3H). <sup>13</sup>C NMR (100 MHz, Chloroform-*d*) δ 172.4, 164.6, 161.6, 140.8, 139.5, 130.5, 122.7, 121.3, 118.1, 89.2, 74.2, 56.6, 55.9, 53.4, 49.9, 45.7, 42.2, 39.6, 38.0, 36.9, 36.5, 36.1, 35.4, 33.8, 33.2, 31.8, 31.7, 30.5, 29.0, 28.2, 27.7, 25.9, 24.2, 22.9, 22.4, 21.5, 20.9, 19.8, 19.2, 18.9, 18.7, 11.9, 11.8. IR (KBr, cm<sup>-1</sup>): 3116, 2939, 1728, 1666, 1624, 1456, 1350, 1138, 1056, 844, 790, 740, 617, 570, 513. HRMS (ESI<sup>+</sup>) *m/z*: [M]<sup>+</sup> calcd for C<sub>41</sub>H<sub>64</sub>NO<sub>3</sub><sup>+</sup>: 618.4881; found: 618.4884.

**4-Methyl-1-(((6-oxo-6-(((4*S*,5'*R*,6*aS*,8*aS*,8*bR*,9*S*,10*R*,11*aS*,12*aS*,12*bR*)-5',6*a*,8*a*,9-tetramethyl-2*a*,3,3',4,4',5,5',6,6*a*,6*b*,6',7,8,8*a*,8*b*,9,11*a*,12,12*a*,12*b*-icosahydrospiro[naphtho[2',1':4,5]indeno[2,1-*b*]furan-10,2'-pyran]-4-yl)oxy)hex-1-en-2-yl)oxy)pyridin-1-ium bis((trifluoromethyl)sulfonyl)amide (2ai)**

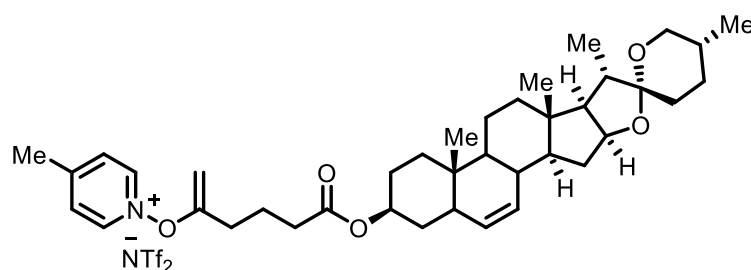

Yellow viscous liquid after purification by column chromatography (CH<sub>2</sub>Cl<sub>2</sub>/MeOH = 100/1); 1.6 g, 90% yield. <sup>1</sup>H NMR (400 MHz, Chloroform-*d*) δ 8.71 (d, *J* = 6.9 Hz, 2H), 8.03 (d,

*J* = 6.4 Hz, 2H), 5.40 – 5.31 (m, 1H), 4.65 – 4.53 (m, 1H), 4.53 – 4.48 (m, 1H), 4.45 – 4.33 (m, 1H), 3.73 (d, *J* = 5.5 Hz, 1H), 3.46 (dd, *J* = 10.5, 3.2 Hz, 1H), 3.35 (t, *J* = 10.7 Hz, 1H), 2.75 (s, 3H), 2.42 (dt, *J* = 18.6, 7.2 Hz, 4H), 2.29 (d, *J* = 7.8 Hz, 2H), 1.96 (td, *J* = 14.4, 6.7 Hz, 4H), 1.90 – 1.68 (m, 6H), 1.68 – 1.51 (m, 7H), 1.51 – 1.35 (m, 3H), 1.33 – 1.22 (m, 1H), 1.21 – 1.04 (m, 3H), 1.02 (s, 3H), 0.95 (d, *J* = 6.9 Hz, 3H), 0.77 (d, *J* = 5.5 Hz, 6H). <sup>13</sup>C NMR (100 MHz, Chloroform-*d*) δ 172.4, 164.6, 161.6, 140.8, 139.6, 130.5, 122.4, 121.3, 118.1, 109.2, 89.3, 80.7, 74.2, 66.8, 61.9, 56.4, 53.4, 49.8, 41.5, 40.2, 39.6, 37.9, 36.8, 36.7, 33.2, 31.9, 31.8, 31.3, 30.5, 30.2, 28.7, 27.6, 22.4, 21.5, 20.7, 19.2, 17.1, 16.2, 14.5. IR (KBr, cm<sup>-1</sup>): 2943, 2900, 1732, 1666, 1624, 1496, 1454, 1350, 1192, 1380, 1056, 790, 736, 617, 570, 513. HRMS (ESI<sup>+</sup>) *m/z*: [M]<sup>+</sup> calcd for C<sub>39</sub>H<sub>56</sub>NO<sub>5</sub><sup>+</sup>: 618.4153; found: 618.4159.

**1-(((6-Oxo-6-(((3*R*,4*S*,5*R*,6*R*)-3,4,5-Tris(benzyloxy)-6-**

**((benzyloxy)methyl)tetrahydro-2*H*-pyran-2-yl)oxy)hex-1-en-2-yl)oxy)pyridin-1-ium bis((trifluoromethyl)sulfonyl)amide (2aj)**

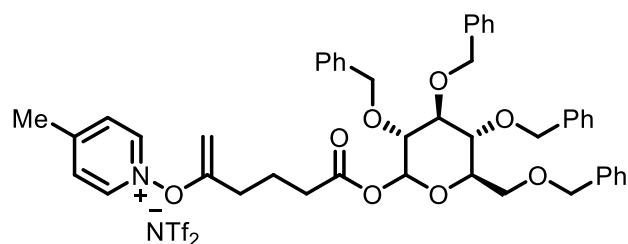

Transparent viscous liquid after purification by column chromatography (CH<sub>2</sub>Cl<sub>2</sub>/ MeOH = 100/1); 1.4 g, 70% yield. <sup>1</sup>H NMR (400 MHz, Chloroform-*d*) δ 8.57 (dd, *J* = 18.1, 5.3 Hz, 2H), 7.90 (dd, *J* = 29.7, 6.9 Hz, 2H), 7.35 – 7.26

(m, 20H), 7.20 – 7.08 (m, 4H), 6.42 – 5.56 (m, 1H), 4.97 – 4.86 (m, 1H), 4.82 (dq, *J* = 11.0, 3.0 Hz, 2H), 4.67 (d, *J* = 4.6 Hz, 1H), 4.56 (dd, *J* = 12.1, 3.4 Hz, 2H), 4.51 – 4.42 (m, 2H), 3.78 – 3.68 (m, 4H), 2.71 (d, *J* = 5.5 Hz, 3H), 2.58 – 2.30 (4H), 2.08 – 1.87 (m, 2H). <sup>13</sup>C NMR (100 MHz, Chloroform-*d*) δ 171.6, 164.3, 161.5, 140.6, 138.4, 138.1, 138.0, 137.8, 137.7, 137.6, 137.5, 130.4, 130.4, 128.4, 128.0, 127.9, 127.86, 127.89, 127.7, 127.6, 121.3, 118.1, 94.1, 90.2, 89.5, 89.4, 84.7, 81.5, 80.9, 78.8, 75.6, 75.5, 75.4, 75.2, 74.9, 73.5, 73.4, 73.3, 73.0, 68.2, 53.4, 32.7, 30.2, 22.4, 21.3, 21.0. IR (KBr, cm<sup>-1</sup>): 3477, 2360, 1643, 1625, 1496, 1452, 1350, 1118, 1134, 1055, 738, 698, 611, 569, 513. HRMS (ESI<sup>+</sup>) *m/z*: [M]<sup>+</sup> calcd for C<sub>46</sub>H<sub>50</sub>NO<sub>8</sub><sup>+</sup>: 744.3531; found: 744.3533.

**1-((6-(((2*R*,3*R*,4*R*,5*R*)-2,4-Bis(benzoyloxy)-5-((benzyloxy)methyl)tetrahydrofuran-3-yl)oxy)-6-oxohex-1-en-2-yl)oxy)pyridin-1-ium bis((trifluoromethyl)sulfonyl)amide (2ak)**

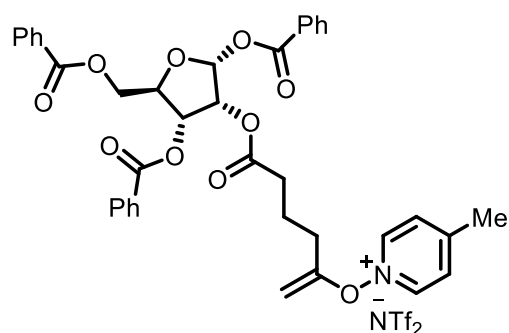

Yellow viscous liquid after purification by column chromatography (CH<sub>2</sub>Cl<sub>2</sub>/ MeOH = 100/1); 1.9 g, 98% yield. <sup>1</sup>H NMR (400 MHz, Chloroform-*d*) δ 8.17 (d, *J* = 6.9 Hz, 2H), 7.77-7.62 (m, 5H), 7.57 (d, *J* = 6.9 Hz, 2H), 7.27-7.12 (m, 3H), 7.11-6.91 (m, 6H), 6.39 (d, *J* = 4.1 Hz, 1H), 5.39 (dd, *J* = 6.4, 2.3 Hz, 1H), 5.16 (dd, *J* = 6.4, 4.6 Hz, 1H), 4.89 (s, 2H), 4.47 (q, *J* = 3.0 Hz, 1H), 4.25 (ddd, *J* = 36.5,

12.2, 3.5 Hz, 2H), 3.89 (d, *J* = 5.5 Hz, 1H), 3.22 (d, *J* = 5.5 Hz, 1H), 2.32 (s, 3H), 1.97 (t, *J* = 6.9 Hz, 2H), 1.90 (t, *J* = 7.3 Hz, 2H), 1.54-1.33 (m, 2H). <sup>13</sup>C NMR (100 MHz, Chloroform-*d*) δ 171.5, 166.1, 165.7, 165.2, 164.2, 161.6, 140.6, 133.9, 133.8, 133.5, 130.4, 129.8, 129.7, 129.7, 128.7, 128.6, 128.5, 121.3, 118.1, 94.7, 89.4, 82.7, 70.9, 70.5, 63.9, 32.2, 30.1, 22.4, 20.9. IR (KBr, cm<sup>-1</sup>): 3103, 2362, 2337, 1718, 1450, 1350, 1267, 1195, 1138, 1056, 711, 615, 570, 518. HRMS (ESI<sup>+</sup>) *m/z*: [M]<sup>+</sup> calcd for C<sub>38</sub>H<sub>36</sub>NO<sub>10</sub><sup>+</sup>: 666.2334; found: 666.2330.

**1-((6-(((3*aS*,4*R*,6*R*,6*aS*)-6-((*R*)-2,2-Dimethyl-1,3-dioxolan-4-yl)-2,2-dimethyltetrahydrofuro[3,4-*d*][1,3]dioxol-4-yl)oxy)-6-oxohex-1-en-2-yl)oxy)pyridin-1-ium bis((trifluoromethyl)sulfonyl)amide (2al)**

Yellow viscous liquid after purification by column chromatography (CH<sub>2</sub>Cl<sub>2</sub>/ MeOH =

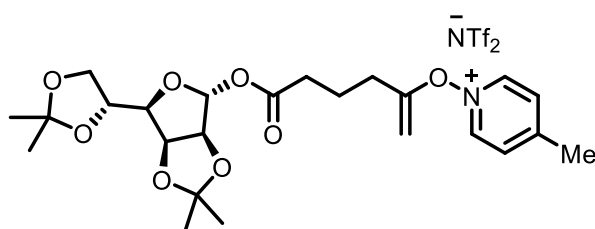

100/1); 1.5 g, 98% yield.  $^1\text{H}$  NMR (400 MHz, Chloroform-*d*)  $\delta$  8.74 (d,  $J = 6.9$  Hz, 2H), 8.01 (d,  $J = 6.9$  Hz, 2H), 6.14–6.07 (m, 1H), 4.85 (dd,  $J = 9.1$ , 5.5 Hz, 1H), 4.69 (d,  $J = 5.9$  Hz, 1H), 4.52 (d,  $J = 5.5$  Hz, 1H), 4.45 – 4.30 (m, 2H), 4.07–3.93 (m, 4H), 3.74 (d,  $J = 5.5$  Hz, 1H), 2.75 (s, 3H), 2.52–2.30 (m, 4H), 1.97 (t,  $J = 7.3$  Hz, 2H), 1.52 – 1.39 (d,  $J = 9.6$  Hz, 6H), 1.33 (d,  $J = 9.6$  Hz, 6H).  $^{13}\text{C}$  NMR (100 MHz, Chloroform-*d*)  $\delta$  207.7, 204.9, 171.6, 145.2, 140.7, 130.4, 126.9, 125.7, 121.2, 117.9, 113.1, 109.2, 100.6, 89.8, 82.1, 79.1, 72.7, 66.6, 44.0, 41.8, 41.1, 32.8, 26.8, 25.8, 24.9, 24.4, 18.3. IR (KBr,  $\text{cm}^{-1}$ ): 2993, 2947, 2360, 2337, 1739, 1350, 1190, 1058, 962, 837, 615, 570, 513. HRMS (ESI $^+$ )  $m/z$ :  $[\text{M}]^+$  calcd for  $\text{C}_{24}\text{H}_{30}\text{NO}_8^+$ : 464.2279; found: 464.2282.

**3,5-Dimethyl-1-((5-phenylpent-1-en-2-yl)oxy)pyridin-1-ium bis((trifluoromethyl)sulfonyl)amide**

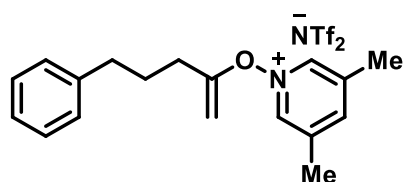

Yellow viscous liquid after purification by column chromatography ( $\text{CH}_2\text{Cl}_2/\text{MeOH} = 100/1$ ); 818.8 mg, 75% yield.  $^1\text{H}$  NMR (400 MHz, Chloroform-*d*)  $\delta$  8.31 – 8.26 (s, 2H), 8.22 – 8.17 (s, 1H), 7.30 (t,  $J = 7.5$  Hz, 2H), 7.24 – 7.18 (m, 3H), 4.49 (d,  $J = 5.5$  Hz, 1H), 3.74 (d,  $J = 5.5$  Hz, 1H), 2.72 (t,  $J = 7.3$  Hz, 2H), 2.58 (s, 6H), 2.41 (t,  $J = 7.8$  Hz, 2H), 2.04 – 1.91 (m, 2H).  $^{13}\text{C}$  NMR (100 MHz, Chloroform-*d*)  $\delta$  165.2, 148.2, 141.3, 141.1, 138.1, 128.6, 128.5, 126.1, 121.3, 118.1, 89.0, 34.9, 30.5, 27.8, 18.4. IR (KBr,  $\text{cm}^{-1}$ ): 3116, 2939, 1728, 1666, 1624, 1462, 1350, 1192, 1138, 1056, 910, 844, 790, 736, 617, 570, 513. HRMS (ESI $^+$ )  $m/z$ :  $[\text{M}]^+$  calcd for  $\text{C}_{18}\text{H}_{22}\text{NO}^+$ : 268.1696; found: 268.1694.

**4-Methoxy-1-((5-phenylpent-1-en-2-yl)oxy)pyridin-1-ium bis((trifluoromethyl)sulfonyl)amide**

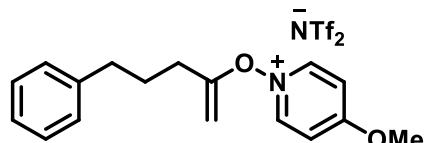

Transparent viscous liquid after purification by column chromatography ( $\text{CH}_2\text{Cl}_2/\text{MeOH} = 100/1$ ); 1.1 g, 99% yield.  $^1\text{H}$  NMR (400 MHz, Chloroform-*d*)  $\delta$  8.46 (d,  $J = 7.8$  Hz, 2H), 7.54 (d,  $J = 7.8$  Hz, 2H), 7.36 – 7.27 (m, 2H), 7.21 (t,  $J = 7.8$  Hz, 3H), 4.45 (d,  $J = 5.5$  Hz, 1H), 4.17 (s, 3H), 3.71 (d,  $J = 5.5$  Hz, 1H), 2.72 (t,  $J = 7.3$  Hz, 2H), 2.38 (t,  $J = 7.5$  Hz, 2H), 2.07 – 1.84 (m, 2H).  $^{13}\text{C}$  NMR (100 MHz, Chloroform-*d*)  $\delta$  171.5, 165.1, 142.9, 141.0, 128.5, 126.1, 121.3, 118.1, 114.7, 88.3, 58.9, 34.8, 30.4, 27.9. IR (KBr,  $\text{cm}^{-1}$ ): 3128, 3026, 2939, 1627, 1512, 1354, 1195, 1138, 1056, 852, 740, 702, 617, 570, 513. HRMS (ESI $^+$ )  $m/z$ :  $[\text{M}]^+$  calcd for  $\text{C}_{17}\text{H}_{20}\text{NO}_2^+$ : 270.1489; found: 270.1488.

**4-Chloro-1-((5-phenylpent-1-en-2-yl)oxy)pyridin-1-ium bis((trifluoromethyl)sulfonyl)amide**

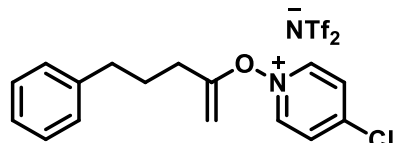

Transparent viscous liquid after purification by column chromatography ( $\text{CH}_2\text{Cl}_2/\text{MeOH} = 100/1$ ); 9211.3 mg, 83% yield.  $^1\text{H}$  NMR (400 MHz, Chloroform-*d*)  $\delta$  8.70 (d,  $J = 7.3$  Hz, 2H), 8.14 (d,  $J = 6.9$  Hz, 2H), 7.30 (t,  $J = 7.3$  Hz, 2H), 7.21 (dd,  $J = 10.5$ , 7.8 Hz, 3H), 4.57 (d,  $J = 5.5$

Hz, 1H), 3.81 (d,  $J = 5.9$  Hz, 1H), 2.73 (t,  $J = 7.3$  Hz, 2H), 2.42 (t,  $J = 7.5$  Hz, 2H), 2.03 – 1.92 (m, 2H).  $^{13}\text{C}$  NMR (100 MHz, Chloroform- $d$ )  $\delta$  165.6, 155.6, 142.8, 141.0, 130.5, 128.6, 128.6, 126.2, 121.3, 118.1, 89.9, 34.8, 30.4, 27.7. IR (KBr,  $\text{cm}^{-1}$ ): 3109, 3028, 2931, 1612, 1473, 1350, 1195, 1138, 1056, 852, 740, 702, 617, 570, 513. HRMS (ESI $^+$ )  $m/z$ :  $[\text{M}]^+$  calcd for  $\text{C}_{16}\text{H}_{17}\text{NO}^+$ : 274.0993; found: 274.1001.

**2-Methyl-1-((5-phenylpent-1-en-2-yl)oxy)pyridin-1-ium bis((trifluoromethyl)sulfonyl)amide**

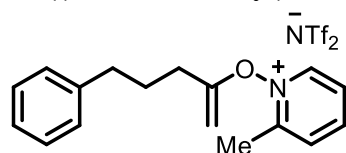

Yellow viscous liquid after purification by column chromatography ( $\text{CH}_2\text{Cl}_2/\text{MeOH} = 100/1$ ); 930.0 mg, 87 % yield.  $^1\text{H}$  NMR (400 MHz, Chloroform- $d$ )  $\delta$  8.60 (d,  $J = 6.4$  Hz, 1H), 8.48 (t,  $J = 7.8$  Hz, 1H), 8.17 – 8.07 (1H), 8.03 (t,  $J = 7.1$  Hz, 1H), 7.31 (t,  $J = 7.5$  Hz, 2H), 7.21 (t,  $J = 8.0$  Hz, 3H), 4.49 (d,  $J = 5.5$  Hz, 1H), 3.61 – 3.50 (d,  $J = 5.5$  Hz, 1H), 2.79 – 2.71 (m, 5H), 2.46 (t,  $J = 7.8$  Hz, 2H), 2.07 – 1.94 (m, 2H).  $^{13}\text{C}$  NMR (100 MHz, Chloroform- $d$ )  $\delta$  163.5, 153.6, 146.3, 141.9, 140.8, 131.4, 128.5, 128.4, 127.7, 126.2, 121.3, 118.1, 87.9, 53.4, 34.9, 30.4, 28.0, 17.1. IR (KBr,  $\text{cm}^{-1}$ ): 3066, 2920, 1666, 1616, 1496, 1458, 1350, 1195, 1138, 1056, 786, 740, 702, 613, 570, 513. HRMS (ESI $^+$ )  $m/z$ :  $[\text{M}]^+$  calcd for  $\text{C}_{17}\text{H}_{20}\text{NO}_2^+$ : 254.1539; found: 254.1540.

### 3. Experimental procedures and characterization of products

#### 3.1 General procedure for the preparation of 1, 4-dicarbonyl compounds(0.2mmol scale)

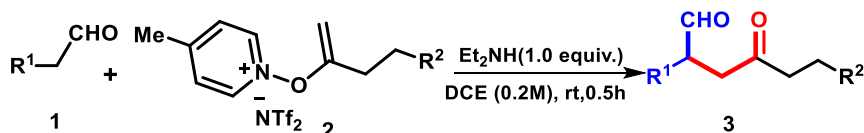

In a 10 mL reaction bottle, **1a** and compound **2a** were dissolved in 1, 2-dichloroethane, stirred evenly, then added into  $\text{Et}_2\text{NH}$  (1equiv) and reacted at room temperature for 30 min. During the reaction, petroleum ether :  $\text{EtOAc} = 5:1$  was used to monitor and a product point with  $R_f = 0.43$  was obtained. After the band reaction, the solvent was dried in vacuum and purified with petroleum ether:  $\text{EtOAc} = 20:1$  in silica gel column to obtain the pure products.

#### 3.2 Characterization of products

##### 2-Benzyl-4-oxo-7-phenylheptanal (3a)

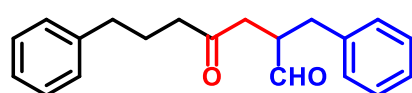

Colorless liquid after purification by column chromatography (petroleum ether :  $\text{EtOAc} = 20/1$ ); 44.1 mg, 75% yield.  $^1\text{H}$  NMR (400 MHz, Chloroform- $d$ )  $\delta$  9.77 (s, 1H), 7.33 – 7.17 (m, 6H), 7.14 (d,  $J = 7.7$  Hz, 5H), 3.21 (tt,  $J = 8.1, 4.7$  Hz, 1H), 3.07 (dd,  $J = 13.8, 6.4$  Hz, 1H), 2.76 (dd,  $J = 18.0, 8.0$  Hz, 1H), 2.68 (dd,  $J = 13.9, 8.5$  Hz, 1H), 2.58 (t,  $J = 7.5$  Hz, 2H), 2.50 – 2.27 (m, 3H), 1.87 (pd,  $J = 7.2, 3.1$  Hz, 2H).  $^{13}\text{C}$  NMR (100 MHz, Chloroform- $d$ )  $\delta$  208.4, 202.8, 141.4, 138.0,

128.9, 128.7, 128.4, 128.4, 126.7, 125.9, 48.3, 41.9, 40.9, 34.9, 34.5, 25.0. IR (KBr,  $\text{cm}^{-1}$ ): 3056, 3021, 2930, 2856, 1713, 1598, 1493, 1444, 1410, 1375, 1186, 1092, 1026, 750, 697. HRMS (ESI<sup>+</sup>)  $m/z$ :  $[M+H]^+$  calcd for  $\text{C}_{20}\text{H}_{23}\text{O}_2^+$ : 295.1693; found: 295.1712.

### 2-Benzyl-4-oxooctanal (3b)

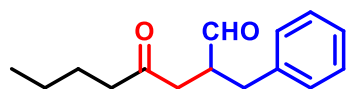

Colorless liquid after purification by column chromatography (petroleum ether : EtOAc = 20/1); 32.1 mg, 69% yield. <sup>1</sup>H NMR (400 MHz, Chloroform-*d*)  $\delta$  9.79 (s, 1H), 7.36 – 7.20 (m, 3H), 7.19 – 7.11 (m, 2H), 3.22 (tdd,  $J$  = 8.1, 6.4, 4.6 Hz, 1H), 3.08 (dd,  $J$  = 13.9, 6.4 Hz, 1H), 2.87 – 2.63 (m, 2H), 2.52 – 2.28 (m, 3H), 1.59 – 1.40 (m, 2H), 1.38 – 1.19 (m, 2H), 0.88 (t,  $J$  = 7.4 Hz, 3H). <sup>13</sup>C NMR (100 MHz, Chloroform-*d*)  $\delta$  208.9, 202.9, 138.0, 129.0, 128.7, 128.5, 126.7, 48.2, 42.6, 40.8, 34.5, 25.8, 22.2, 13.8. IR (KBr,  $\text{cm}^{-1}$ ): 2956, 2924, 2861, 1713, 1454, 1366, 744, 702. HRMS (ESI<sup>+</sup>)  $m/z$ :  $[M+Na]^+$  calcd for  $\text{C}_{15}\text{H}_{20}\text{O}_2\text{Na}^+$ : 255.1356 ; found: 255.1359.

### 2-Benzyl-4-oxodecanal (3c)

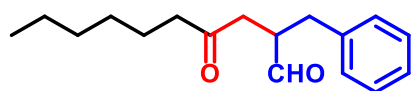

Colorless liquid after purification by column chromatography (petroleum ether : EtOAc = 20/1); 35.4 mg, 68% yield. <sup>1</sup>H NMR (400 MHz, Chloroform-*d*)  $\delta$  9.78 (s, 1H), 7.33 – 7.23 (m, 2H), 7.26 – 7.18 (m, 1H), 7.18 – 7.11 (m, 2H), 3.26 – 3.14 (m, 1H), 3.07 (dd,  $J$  = 13.8, 6.4 Hz, 1H), 2.78 (dd,  $J$  = 18.0, 7.9 Hz, 1H), 2.68 (dd,  $J$  = 13.9, 8.5 Hz, 1H), 2.45 – 2.26 (m, 3H), 1.57 – 1.45 (m, 2H), 1.24 (dtd,  $J$  = 10.0, 7.2, 4.6 Hz, 6H), 0.85 (t,  $J$  = 6.9 Hz, 3H). <sup>13</sup>C NMR (100 MHz, Chloroform-*d*)  $\delta$  203.0, 138.0, 129.0, 128.7, 126.7, 48.2, 42.9, 40.8, 34.5, 31.5, 28.7, 23.6, 22.4, 14.0. IR (KBr,  $\text{cm}^{-1}$ ): 2930, 2856, 1713, 1497, 1455, 1410, 1368, 746, 694. HRMS (ESI<sup>+</sup>)  $m/z$ :  $[M+Na]^+$  calcd for  $\text{C}_{17}\text{H}_{24}\text{O}_2\text{Na}^+$ : 283.1699 ; found: 283.1695.

### 2-Benzyl-4-oxoheptadecanal (3d)

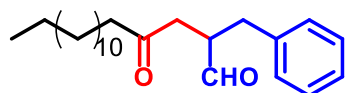

Colorless liquid after purification by column chromatography (petroleum ether : EtOAc = 20/1); 41.0 mg, 55% yield. <sup>1</sup>H NMR (400 MHz, Chloroform-*d*)  $\delta$  9.70 (s, 1H), 7.36 – 7.22 (m, 2H), 7.25 – 7.10 (m, 3H), 2.99 – 2.76 (m, 1H), 2.62 (p,  $J$  = 7.0 Hz, 2H), 2.54 – 2.33 (m, 2H), 2.12 (s, 2H), 1.99 – 1.83 (m, 2H), 1.56 (s, 2H), 1.44 – 1.17 (m, 10H), 0.92 – 0.84 (m, 3H). <sup>13</sup>C NMR (100 MHz, Chloroform-*d*)  $\delta$  209.0, 203.0, 138.0, 129.2 - 128.2 (m), 126.7, 77.2, 48.2, 42.9, 40.8, 34.5, 31.9, 29.7 - 28.7 (m), 28.1, 23.2 (d,  $J$  = 103.6 Hz), 14.1. IR (KBr,  $\text{cm}^{-1}$ ): 2923, 2856, 1713, 1451, 1266, 914, 750, 690. HRMS (ESI<sup>+</sup>)  $m/z$ :  $[M+H]^+$  calcd for  $\text{C}_{25}\text{H}_{41}\text{O}_2^+$ : 373.3101 ; found: 373.3126.

### Methyl-7-benzyl-5,8-dioxooctanoate (3e)

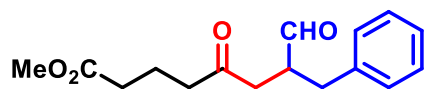

Colorless liquid after purification by column chromatography (petroleum ether : EtOAc = 20/1); 38.1 mg, 69% yield. <sup>1</sup>H NMR (400 MHz, Chloroform-*d*)  $\delta$  9.77 (s, 1H), 7.37 – 7.20 (m, 3H), 7.18 – 7.09 (m, 2H), 3.65 (s, 2H), 3.28 – 3.17 (m, 1H), 3.09 (dd,  $J$  = 13.9, 6.3 Hz, 1H), 2.83 – 2.62 (m, 2H), 2.58 – 2.35 (m, 3H), 2.30 (t,  $J$  = 7.3 Hz, 2H), 1.94 – 1.75 (m, 2H). <sup>13</sup>C NMR (100 MHz, Chloroform-*d*)  $\delta$  207.9, 202.8, 173.6, 137.9, 129.0, 128.7, 126.8, 51.5, 48.4, 41.6, 40.8, 34.5, 32.8, 18.7. IR (KBr,  $\text{cm}^{-1}$ ): 2954, 2924, 1732, 1422, 1172, 748, 702. HRMS (ESI<sup>+</sup>)  $m/z$ :  $[M+Na]^+$  calcd for  $\text{C}_{16}\text{H}_{20}\text{O}_4\text{Na}^+$ : 299.1254 ; found: 299.1250.

**2-Benzyl-7-chloro-4-oxoheptanal (3f)**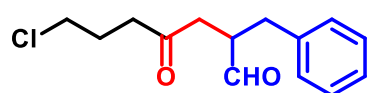

Colorless liquid after purification by column chromatography (petroleum ether : EtOAc = 20/1); 38.9 mg, 74% yield.  $^1\text{H}$  NMR (400 MHz, Chloroform-*d*)  $\delta$  9.77 (s, 1H), 7.30 (td,  $J = 7.1, 6.1, 1.4$  Hz, 2H), 7.26 – 7.17 (m, 1H), 7.15 (dd,  $J = 7.2, 1.6$  Hz, 2H), 3.52 (t,  $J = 6.3$  Hz, 2H), 3.22 (tdd,  $J = 8.3, 6.2, 4.6$  Hz, 1H), 3.09 (dd,  $J = 13.9, 6.3$  Hz, 1H), 2.79 (dd,  $J = 17.9, 8.1$  Hz, 1H), 2.69 (dd,  $J = 13.9, 8.7$  Hz, 1H), 2.57 (qt,  $J = 17.8, 6.9$  Hz, 2H), 2.40 (dd,  $J = 17.9, 4.6$  Hz, 1H), 2.07 – 1.91 (m, 2H).  $^{13}\text{C}$  NMR (100 MHz, Chloroform-*d*)  $\delta$  208.1, 202.8, 137.9, 128.9, 128.7, 126.8, 48.4, 44.6, 41.8, 40.7, 34.5, 31.7, 20.8. IR (KBr,  $\text{cm}^{-1}$ ): 2921, 2854, 1713, 1496, 1447, 1415, 1373, 1093, 1023, 744, 705. HRMS (ESI<sup>+</sup>)  $m/z$ :  $[\text{M}+\text{Na}]^+$  calcd for  $\text{C}_{14}\text{H}_{17}\text{ClO}_2\text{Na}^+$ : 275.0809 ; found: 275.0825.

**2-Benzyl-8-chloro-4-oxooctanal (3g)**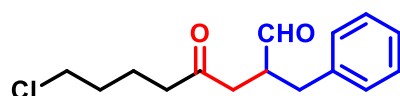

Colorless liquid after purification by column chromatography (petroleum ether : EtOAc = 20/1); 38.4 mg, 72% yield.  $^1\text{H}$  NMR (400 MHz, Chloroform-*d*)  $\delta$  9.79 (s, 1H), 7.39 – 7.27 (m, 2H), 7.31 – 7.19 (m, 1H), 7.16 (dd,  $J = 6.9, 1.8$  Hz, 2H), 3.51 (t,  $J = 6.2$  Hz, 2H), 3.24 (tdd,  $J = 8.4, 6.3, 4.5$  Hz, 1H), 3.10 (dd,  $J = 13.9, 6.3$  Hz, 1H), 2.89 – 2.60 (m, 2H), 2.48 (dd,  $J = 17.5, 7.4$  Hz, 1H), 2.45 – 2.30 (m, 2H), 1.79 – 1.62 (m, 3H).  $^{13}\text{C}$  NMR (100 MHz, Chloroform-*d*)  $\delta$  208.1, 202.8, 137.9, 128.9, 128.7, 126.8, 48.4, 44.6, 41.8, 40.7, 34.5, 31.7, 20.8. IR (KBr,  $\text{cm}^{-1}$ ): 2930, 2867, 1720, 1455, 1410, 1375, 743, 701. HRMS (ESI<sup>+</sup>)  $m/z$ :  $[\text{M}+\text{Na}]^+$  calcd for  $\text{C}_{15}\text{H}_{19}\text{ClO}_2\text{Na}^+$ : 289.0966; found: 289.0956.

**8-Benzyl-6,9-dioxononanenitrile (3h)**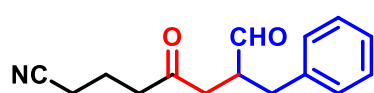

Colorless liquid after purification by column chromatography (dichloromethane/ethyl acetate = 50/1); 41.4 mg, 85% yield.  $^1\text{H}$  NMR (400 MHz, Chloroform-*d*)  $\delta$  9.76 (s, 1H), 7.31 (tt,  $J = 6.8, 1.2$  Hz, 2H), 7.27 – 7.21 (m, 1H), 7.17 – 7.13 (m, 2H), 4.16 – 4.06 (m, 1H), 3.31 – 3.19 (m, 1H), 3.11 (dd,  $J = 13.9, 6.1$  Hz, 1H), 2.83 – 2.72 (m, 1H), 2.75 – 2.58 (m, 1H), 2.52 (dt,  $J = 18.2, 6.9$  Hz, 1H), 2.48 – 2.28 (m, 1H), 1.88 (h,  $J = 7.2$  Hz, 2H), 1.25 (td,  $J = 7.2, 0.9$  Hz, 2H).  $^{13}\text{C}$  NMR (100 MHz, Chloroform-*d*)  $\delta$  207.0, 202.5, 137.7, 128.9, 128.8, 126.9, 119.2, 77.3, 77.2, 77.0, 76.7, 48.7, 40.7, 40.5, 34.4, 19.2, 16.4. IR (KBr,  $\text{cm}^{-1}$ ): 2933, 2849, 2241, 1713, 1490, 1451, 1413, 1371, 1095, 753, 701. HRMS (ESI<sup>+</sup>)  $m/z$ :  $[\text{M}+\text{Na}]^+$  calcd for  $\text{C}_{15}\text{H}_{17}\text{NO}_2\text{Na}^+$ : 266.1151 ; found: 266.1138.

**2-Benzyl-4-oxo-6-phenylhexanal (3i)**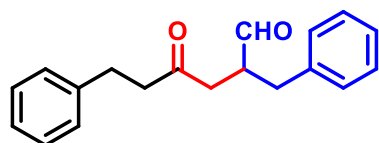

Colorless liquid after purification by column chromatography (petroleum ether : EtOAc = 20/1); 43.2 mg, 77% yield.  $^1\text{H}$  NMR (400 MHz, Chloroform-*d*)  $\delta$  9.79 (s, 1H), 7.45 – 6.96 (m, 5H), 3.22 (tdd,  $J = 8.1, 6.4, 4.6$  Hz, 1H), 3.08 (dd,  $J = 13.9, 6.4$  Hz, 1H), 2.87 – 2.63 (m, 2H), 2.52 – 2.28 (m, 3H), 1.59 – 1.40 (m, 2H), 1.38 – 1.19 (m, 2H), 0.88 (t,  $J = 7.4$  Hz, 3H).  $^{13}\text{C}$  NMR (100 MHz, Chloroform-*d*)  $\delta$  207.8, 202.8, 140.8, 137.9, 129.0, 128.7, 128.5, 128.3, 126.7, 126.1, 48.3, 44.3, 41.0, 34.4, 29.6. IR (KBr,  $\text{cm}^{-1}$ ): 3024, 1717, 1490, 1437, 1399, 1357, 1095,



1078, 734, 697. HRMS (ESI<sup>+</sup>) m/z: [M+H]<sup>+</sup> calcd for C<sub>19</sub>H<sub>21</sub>O<sub>2</sub><sup>+</sup>: 281.1536; found: 281.1546.

### Benzyl-7-benzyl-5,8-dioxooctanoate (3j)

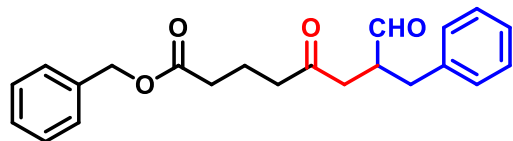

Colorless liquid after purification by column chromatography (petroleum ether : EtOAc = 20/1); 45.8 mg, 65% yield. <sup>1</sup>H NMR (400 MHz, Chloroform-*d*) δ 9.77 (s, 1H), 7.40 – 7.31 (m, 5H), 7.31 – 7.18 (m, 3H), 7.18 – 7.11 (m, 2H), 5.10 (s, 2H), 3.22 (tdd, *J* = 8.3, 6.3, 4.6 Hz, 1H), 3.08 (dd, *J* = 13.9, 6.4 Hz, 1H), 2.82 – 2.61 (m, 2H), 2.56 – 2.26 (m, 5H), 1.97 – 1.79 (m, 2H). <sup>13</sup>C NMR (100 MHz, Chloroform-*d*) δ 207.8, 202.7, 172.9, 137.9, 135.9, 128.9, 128.7, 128.5, 128.4, 128.2, 126.7, 66.2, 48.3, 41.5, 40.8, 34.5, 33.1, 18.7. IR (KBr, cm<sup>-1</sup>): 3031, 2944, 2716, 1727, 1493, 1455, 1413, 1382, 1162, 746, 694. HRMS (ESI<sup>+</sup>) m/z: [M+Na]<sup>+</sup> calcd for C<sub>22</sub>H<sub>24</sub>O<sub>4</sub>Na<sup>+</sup>: 375.1567 ; found: 375.1559.

### 4-Chlorobenzyl-7-benzyl-5,8-dioxooctanoate (3k)

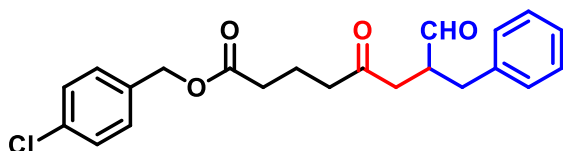

Colorless liquid after purification by column chromatography (petroleum ether : EtOAc = 20/1); 51.8 mg, 67% yield. <sup>1</sup>H NMR (400 MHz, Chloroform-*d*) δ 9.77 (s, 1H), 7.37 – 7.21 (m, 7H), 7.19 – 7.11 (m, 2H), 5.06 (d, *J* = 5.5 Hz, 2H), 3.22 (tdd, *J* = 8.3, 6.2, 4.5 Hz, 1H), 3.08 (dd, *J* = 13.9, 6.3 Hz, 1H), 2.86 – 2.62 (m, 2H), 2.56 – 2.29 (m, 5H), 1.98 – 1.76 (m, 2H). <sup>13</sup>C NMR (100 MHz, Chloroform-*d*) δ 207.8, 202.7, 172.8, 137.8, 134.4, 134.1, 129.6, 128.9, 128.7, 126.8, 65.3, 48.4, 41.5, 40.8, 34.4, 33.0, 18.6. IR (KBr, cm<sup>-1</sup>): 2936, 1734, 1493, 1455, 1417, 1371, 1162, 1085, 1015, 806, 743, 697. HRMS (ESI<sup>+</sup>) m/z: [M+Na]<sup>+</sup> calcd for C<sub>22</sub>H<sub>23</sub>ClO<sub>4</sub>Na<sup>+</sup>: 409.1177; found: 409.1167.

### 4-Methylbenzyl-7-benzyl-5,8-dioxooctanoate (3l)

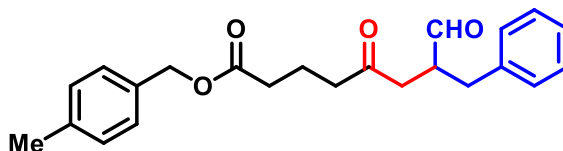

Colorless liquid after purification by column chromatography (petroleum ether : EtOAc = 20/1); 48.4 mg, 66% yield. <sup>1</sup>H NMR (400 MHz, Chloroform-*d*) δ 9.77 (s, 1H), 7.38 – 7.26 (m, 2H), 7.30 – 7.19 (m, 3H), 7.23 – 7.08 (m, 4H), 5.06 (s, 2H), 3.21 (tdd, *J* = 8.3, 6.4, 4.5 Hz, 1H), 3.08 (dd, *J* = 13.9, 6.4 Hz, 1H), 2.83 – 2.70 (m, 1H), 2.68 (dd, *J* = 13.9, 8.6 Hz, 1H), 2.53 – 2.37 (m, 3H), 2.34 (d, *J* = 6.7 Hz, 5H), 1.94 – 1.81 (m, 2H). <sup>13</sup>C NMR (100 MHz, Chloroform-*d*) δ 207.8, 202.7, 172.9, 138.1, 137.9, 132.9, 129.2, 128.9, 128.7, 128.4, 126.7, 66.2, 48.3, 41.5, 40.8, 34.5, 33.1, 21.2, 18.7. IR (KBr, cm<sup>-1</sup>): 2937, 1713, 1514, 1468, 1462, 1410, 1368, 1169, 806, 739, 694. HRMS (ESI<sup>+</sup>) m/z: [M+Na]<sup>+</sup> calcd for C<sub>23</sub>H<sub>26</sub>O<sub>4</sub>Na<sup>+</sup>: 389.1723 ; found: 389.1715.

### 2-Benzyl-8-(benzyloxy)-4-oxooctanal (3m)

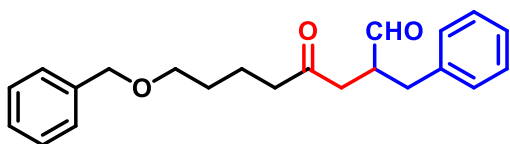

Colorless liquid after purification by column chromatography (petroleum ether : EtOAc = 20/1); 44.7 mg, 67% yield. <sup>1</sup>H NMR (400 MHz, Chloroform-*d*) δ 9.78 (s, 1H), 7.33 (d,

$J = 6.0$  Hz, 4H), 7.31 – 7.22 (m, 4H), 7.22 – 7.08 (m, 2H), 4.48 (s, 2H), 3.45 (t,  $J = 6.0$  Hz, 2H), 3.27 – 3.14 (m, 1H), 3.07 (dd,  $J = 13.9, 6.4$  Hz, 1H), 2.87 – 2.56 (m, 2H), 2.52 – 2.31 (m, 3H), 1.62 (dtt,  $J = 15.6, 9.3, 3.4$  Hz, 4H).  $^{13}\text{C}$  NMR (100 MHz, Chloroform-*d*)  $\delta$  208.6, 202.9, 138.5, 138.0, 129.0, 128.7, 128.3, 127.6, 127.5, 126.7, 72.9, 69.9, 48.3, 42.5, 40.8, 34.5, 29.0, 20.4. IR (KBr,  $\text{cm}^{-1}$ ): 2930, 2860, 1717, 1497, 1455, 1357, 1102, 739, 679. HRMS (ESI<sup>+</sup>)  $m/z$ :  $[\text{M}+\text{Na}]^+$  calcd for  $\text{C}_{22}\text{H}_{26}\text{O}_3\text{Na}^+$ : 361.1774; found: 361.1764.

### 2-Benzyl-8-((4-chlorobenzyl)oxy)-4-oxooctanal (3n)

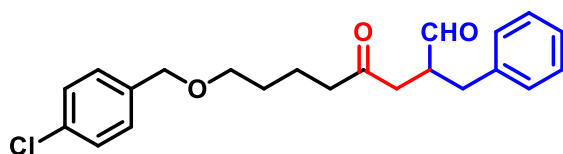

Colorless liquid after purification by column chromatography (petroleum ether : EtOAc = 20/1); 50.0 mg, 67% yield.  $^1\text{H}$  NMR (400 MHz, Chloroform-*d*)  $\delta$  9.78 (s, 1H), 7.30 (ddd,  $J = 8.2, 4.0,$

2.8 Hz, 4H), 7.30 – 7.17 (m, 2H), 7.21 – 7.08 (m, 2H), 4.43 (s, 2H), 3.51 – 3.36 (m, 2H), 3.22 (ddd,  $J = 13.8, 10.2, 6.7$  Hz, 1H), 3.08 (dd,  $J = 13.9, 6.4$  Hz, 1H), 2.88 – 2.61 (m, 2H), 2.51 – 2.31 (m, 3H), 1.71 – 1.49 (m, 3H).  $^{13}\text{C}$  NMR (100 MHz, Chloroform-*d*)  $\delta$  208.6, 202.9, 137.9, 137.0, 133.2, 128.9, 128.9, 128.7, 128.5, 126.7, 72.0, 70.0, 48.3, 42.4, 40.8, 34.4, 29.0, 20.4. IR (KBr,  $\text{cm}^{-1}$ ): 2944, 2863, 1713, 1497, 1451, 1406, 1357, 1095, 1019, 809, 750, 701. HRMS (ESI<sup>+</sup>)  $m/z$ :  $[\text{M}+\text{Na}]^+$  calcd for  $\text{C}_{22}\text{H}_{25}\text{ClO}_3\text{Na}^+$ : 395.1384; found: 395.1370.

### 2-Benzyl-8-((4-methylbenzyl)oxy)-4-oxooctanal (3o)

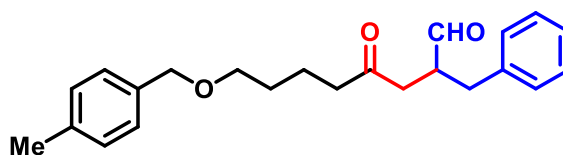

Light yellow liquid after purification by column chromatography (petroleum ether : EtOAc = 20/1); 47.9 mg, 68% yield.  $^1\text{H}$  NMR (400 MHz, Chloroform-*d*)  $\delta$  9.78 (s, 1H), 7.38 – 7.25 (m, 2H),

7.28 – 7.17 (m, 3H), 7.21 – 7.08 (m, 4H), 4.44 (s, 2H), 3.43 (q,  $J = 5.5$  Hz, 2H), 3.21 (tdd,  $J = 8.2, 6.4, 4.6$  Hz, 1H), 3.08 (dd,  $J = 13.9, 6.4$  Hz, 1H), 2.86 – 2.62 (m, 2H), 2.50 – 2.34 (m, 3H), 2.34 (s, 3H), 1.61 (tddt,  $J = 15.1, 9.1, 6.1, 2.6$  Hz, 3H).  $^{13}\text{C}$  NMR (100 MHz, Chloroform-*d*)  $\delta$  208.6, 202.9, 138.0, 137.2, 135.4, 129.0, 128.9, 128.7, 127.7, 126.7, 72.7, 69.7, 48.2, 42.5, 40.8, 34.4, 29.0, 21.1, 20.4. IR (KBr,  $\text{cm}^{-1}$ ): 2926, 2860, 1710, 1455, 1413, 1364, 1099, 802, 750, 694. HRMS (ESI<sup>+</sup>)  $m/z$ :  $[\text{M}+\text{Na}]^+$  calcd for  $\text{C}_{23}\text{H}_{28}\text{O}_3\text{Na}^+$ : 375.1931; found: 375.1922.

### 2-(4-Chlorobenzyl)-4-oxo-7-phenylheptanal (3p)

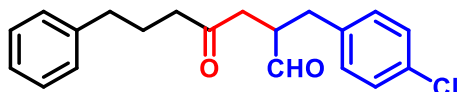

Colorless liquid after purification by column chromatography (petroleum ether : EtOAc = 20/1); 46.6 mg, 71% yield.  $^1\text{H}$  NMR (400 MHz,

Chloroform-*d*)  $\delta$  9.74 (s, 1H), 7.31 – 7.22 (m, 4H), 7.26 – 7.14 (m, 1H), 7.18 – 7.11 (m, 2H), 7.11 – 7.04 (m, 2H), 3.16 (qd,  $J = 7.7, 4.9$  Hz, 1H), 3.03 (dd,  $J = 14.0, 6.5$  Hz, 1H), 2.74 (dd,  $J = 18.0, 7.8$  Hz, 1H), 2.65 (dd,  $J = 13.9, 8.3$  Hz, 1H), 2.58 (t,  $J = 7.5$  Hz, 2H), 2.48 – 2.28 (m, 3H), 1.87 (pd,  $J = 7.3, 2.5$  Hz, 2H).  $^{13}\text{C}$  NMR (100 MHz, Chloroform-*d*)  $\delta$  208.3, 202.4, 141.4, 136.5, 132.6, 130.3, 128.8, 128.4, 128.4, 126.0, 48.1, 41.9, 40.8, 34.9, 33.8, 25.0. IR (KBr,  $\text{cm}^{-1}$ ): 3026, 2921, 2854, 1713, 1492, 1450, 1408, 1359, 1090, 1009, 740, 698. HRMS (ESI<sup>+</sup>)  $m/z$ :  $[\text{M}-\text{H}]^-$  calcd for  $\text{C}_{20}\text{H}_{20}\text{ClO}_2^-$ :

327.1157 ; found: 327.1154.

**2-(4-Bromobenzyl)-4-oxo-7-phenylheptanal (3q)**

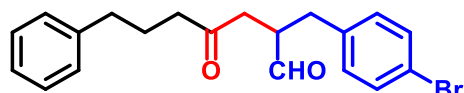

Light green liquid after purification by column chromatography (petroleum ether : EtOAc = 20/1); 53.8 mg, 72% yield. <sup>1</sup>H NMR (400 MHz,

Chloroform-*d*) δ 9.74 (s, 1H), 7.45 – 7.30 (m, 2H), 7.30 – 7.25 (m, 1H), 7.25 – 7.15 (m, 1H), 7.18 – 7.08 (m, 2H), 7.02 (s, 1H), 7.03 – 6.90 (m, 1H), 3.16 (tdd, *J* = 7.9, 6.4, 4.8 Hz, 1H), 3.01 (dd, *J* = 14.0, 6.5 Hz, 1H), 2.80 – 2.67 (m, 1H), 2.67 – 2.61 (m, 1H), 2.61 – 2.55 (m, 2H), 2.47 – 2.25 (m, 3H), 1.95 – 1.78 (m, 2H). <sup>13</sup>C NMR (100 MHz, Chloroform-*d*) δ 208.2, 202.4, 141.4, 137.0, 131.8, 130.7, 128.4, 128.4, 126.0, 120.6, 53.4, 48.0, 41.9, 40.8, 34.9, 33.8, 25.0. IR (KBr, cm<sup>-1</sup>) : 2930, 2849, 1713, 1493, 1444, 1410, 1368, 1071, 1012, 750, 697. HRMS (ESI<sup>+</sup>) *m/z*: [M-H]<sup>-</sup> calcd for C<sub>20</sub>H<sub>20</sub>BrO<sub>2</sub>: 371.0652 ; found: 371.0641.

**2-(4-Methoxybenzyl)-4-oxo-7-phenylheptanal (3r)**

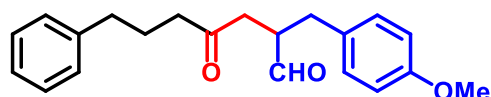

Colorless liquid after purification by column chromatography (petroleum ether : EtOAc = 20/1); 44.8 mg, 69% yield. <sup>1</sup>H NMR (400 MHz,

Chloroform-*d*) δ 9.76 (s, 1H), 7.30 – 7.22 (m, 3H), 7.21 – 7.11 (m, 3H), 7.04 (d, *J* = 8.7 Hz, 2H), 6.82 (d, *J* = 8.7 Hz, 2H), 3.77 (s, 3H), 3.21 – 3.12 (m, 1H), 3.00 (q, *J* = 6.9 Hz, 1H), 2.74 (dd, *J* = 18.1, 8.0 Hz, 1H), 2.68 – 2.61 (m, 1H), 2.57 (t, *J* = 7.5 Hz, 2H), 2.47 – 2.28 (m, 3H), 1.93 – 1.78 (m, 2H). <sup>13</sup>C NMR (100 MHz, Chloroform-*d*) δ 208.6, 203.1, 158.4, 141.5, 129.9, 128.4, 128.3, 125.9, 114.1, 55.2, 48.5, 41.9, 40.8, 34.9, 33.6, 25.1. IR (KBr, cm<sup>-1</sup>) : 2935, 2854, 1713, 1486, 1425, 1388, 1051, 1023, 745, 693. HRMS (ESI<sup>+</sup>) *m/z*: [M+Na]<sup>+</sup> calcd for C<sub>21</sub>H<sub>24</sub>O<sub>3</sub>Na<sup>+</sup>: 347.1618 ; found: 347.1615.

**4-Oxo-7-phenyl-2-(thiophen-2-ylmethyl)heptanal (3s)**

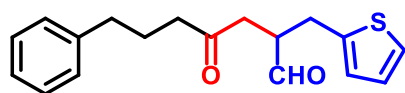

Colorless liquid after purification by column chromatography (petroleum ether : EtOAc = 20/1); 41.5 mg, 69% yield. <sup>1</sup>H NMR (400 MHz,

Chloroform-*d*) δ 9.78 (s, 1H), 7.35 - 7.21 (m, 2H), 7.24 - 7.15 (m, 1H), 7.19 - 7.07 (m, 3H), 6.91 (dd, *J* = 5.2, 3.4 Hz, 1H), 6.77 (dt, *J* = 3.5, 1.0 Hz, 1H), 3.48 (s, 1H), 3.46 - 3.09 (m, 3H), 3.00 (ddd, *J* = 14.6, 7.5, 0.8 Hz, 1H), 2.88 - 2.71 (m, 1H), 2.60 (q, *J* = 7.8 Hz, 2H), 2.53 - 2.45 (m, 1H), 2.44 - 2.35 (m, 2H), 1.98 - 1.80 (m, 2H). <sup>13</sup>C NMR (100 MHz, Chloroform-*d*) δ 208.3, 202.4, 141.4, 140.2, 128.4, 128.4, 127.1, 126.1, 126.0, 124.3, 48.3, 41.9, 40.9, 34.9, 28.4, 25.0. IR (KBr, cm<sup>-1</sup>) : 2919, 2856, 1713, 1451, 1406, 1364, 1092, 1022, 746, 694. HRMS (ESI<sup>+</sup>) *m/z*: [M+Na]<sup>+</sup> calcd for C<sub>18</sub>H<sub>20</sub>O<sub>2</sub>SNa<sup>+</sup>: 323.1076 ; found: 323.1085.

**2-((4-Methylcyclopentadien-1-yl)methyl)-4-oxo-7-phenylheptanal (3t)**

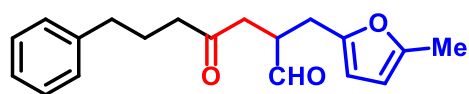

Colorless liquid after purification by column chromatography (petroleum ether : EtOAc = 20/1); 35.8 mg, 63% yield. <sup>1</sup>H NMR (400 MHz,

Chloroform-*d*) δ 9.76 (s, 1H), 7.27 (td, *J* = 6.2, 2.9 Hz, 2H), 7.22 – 7.12 (m, 3H), 5.88 (d, *J* = 3.1 Hz, 1H), 5.84 – 5.79 (m, 1H), 3.22 – 3.11 (m, 1H), 2.99 (dd, *J* = 15.3, 6.2 Hz, 1H), 2.85 – 2.74 (m, 2H), 2.60 (t, *J* = 7.5 Hz, 2H), 2.51 – 2.41 (m, 2H), 2.43 – 2.31

(m, 1H), 2.21 (s, 3H), 1.89 (pd,  $J = 7.4, 1.8$  Hz, 2H).  $^{13}\text{C}$  NMR (100 MHz, Chloroform-*d*)  $\delta$  208.5, 202.7, 151.5, 149.9, 141.6, 128.6, 128.5, 126.1, 107.9, 106.1, 46.1, 42.1, 40.9, 35.1, 27.0, 25.2, 13.6. IR (KBr,  $\text{cm}^{-1}$ ): 3028, 2926, 2853, 1713, 1605, 1574, 1574, 1497, 1406, 1364, 1211, 1029, 785, 753, 704. HRMS (ESI<sup>+</sup>)  $m/z$ :  $[\text{M}+\text{H}]^+$  calcd for  $\text{C}_{19}\text{H}_{23}\text{O}_3^+$ : 299.1642; found: 299.1648.

### 2-Ethyl-4-oxo-7-phenylheptanal (3u)

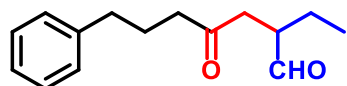

Colorless liquid after purification by column chromatography (petroleum ether : EtOAc = 20/1); 29.3 mg, 63% yield.  $^1\text{H}$  NMR (400 MHz, Chloroform-*d*)  $\delta$  9.69 (s, 1H), 7.31 – 7.23 (m, 3H), 7.22 – 7.13 (m, 3H), 2.92 – 2.76 (m, 2H), 2.61 (t,  $J = 7.5$  Hz, 2H), 2.50 (dt,  $J = 13.9, 5.7$  Hz, 1H), 2.48 – 2.38 (m, 1H), 2.42 – 2.31 (m, 1H), 1.99 – 1.83 (m, 2H), 1.81 – 1.66 (m, 1H), 1.56 – 1.35 (m, 1H), 0.93 (t,  $J = 7.5$  Hz, 4H).  $^{13}\text{C}$  NMR (100 MHz, Chloroform-*d*)  $\delta$  208.7, 203.5, 141.5, 128.5, 128.4, 126.0, 48.0, 42.1, 40.8, 35.0, 25.2, 21.6, 11.4. IR (KBr,  $\text{cm}^{-1}$ ): 3061, 2954, 1713, 1454, 1408, 1380, 1181, 751, 702. HRMS (ESI<sup>+</sup>)  $m/z$ :  $[\text{M}+\text{Na}]^+$  calcd for  $\text{C}_{15}\text{H}_{20}\text{O}_2\text{Na}^+$ : 255.1356; found: 255.1371.

### 2-Butyl-4-oxo-7-phenylheptanal (3v)

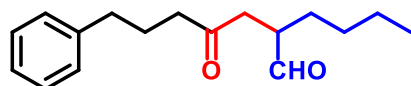

Colorless liquid after purification by column chromatography (petroleum ether : EtOAc = 20/1); 32.3 mg, 62% yield.  $^1\text{H}$  NMR (400 MHz, Chloroform-*d*)  $\delta$  9.70 (s, 1H), 7.33 – 7.24 (m, 2H), 7.23 – 7.14 (m, 3H), 2.91 (dtd,  $J = 12.6, 6.4, 3.9$  Hz, 1H), 2.83 (dd,  $J = 17.3, 8.4$  Hz, 1H), 2.62 (t,  $J = 7.6$  Hz, 2H), 2.56 – 2.34 (m, 3H), 2.00 – 1.84 (m, 2H), 1.76 – 1.63 (m, 1H), 1.39 – 1.22 (m, 4H), 0.90 (t,  $J = 6.9$  Hz, 3H).  $^{13}\text{C}$  NMR (100 MHz, Chloroform-*d*)  $\delta$  208.7, 203.5, 141.5, 128.5, 128.4, 125.9, 46.7, 42.0, 41.3, 35.0, 29.1, 28.3, 25.1, 22.7, 13.8. IR (KBr,  $\text{cm}^{-1}$ ): 2935, 2865, 1713, 1461, 1408, 1373, 740, 702. HRMS (ESI<sup>+</sup>)  $m/z$ :  $[\text{M}+\text{Na}]^+$  calcd for  $\text{C}_{17}\text{H}_{24}\text{O}_2\text{Na}^+$ : 283.1669; found: 283.1700.

### 4-Oxo-2-petroleum etherntyl-7-phenylheptanal (3w)

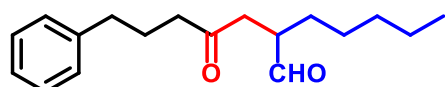

Colorless liquid after purification by column chromatography (petroleum ether : EtOAc = 20/1); 33.5 mg, 61% yield.  $^1\text{H}$  NMR (400 MHz, Chloroform-*d*)  $\delta$  9.70 (s, 1H), 7.28 (t,  $J = 7.8$  Hz, 2H), 7.19 (dd,  $J = 10.6, 7.4$  Hz, 3H), 2.91 (qd,  $J = 6.4, 3.8$  Hz, 1H), 2.83 (dd,  $J = 17.4, 8.3$  Hz, 1H), 2.62 (t,  $J = 7.5$  Hz, 2H), 2.56 – 2.34 (m, 3H), 2.00 – 1.84 (m, 2H), 1.75 – 1.62 (m, 1H), 1.43 – 1.24 (m, 7H), 0.88 (t,  $J = 6.5$  Hz, 3H).  $^{13}\text{C}$  NMR (100 MHz, Chloroform-*d*)  $\delta$  208.7, 203.5, 141.5, 128.5, 128.4, 125.9, 46.7, 42.0, 41.3, 35.0, 31.7, 28.5, 26.7, 25.1, 22.4, 13.9. IR (KBr,  $\text{cm}^{-1}$ ): 2973, 2863, 1713, 1455, 1410, 1368, 750, 697. HRMS (ESI<sup>+</sup>)  $m/z$ :  $[\text{M}+\text{H}]^+$  calcd for  $\text{C}_{18}\text{H}_{27}\text{O}_2^+$ : 275.2006; found: 275.1994.

### 2-(2-Oxo-5-phenylpetroleum etherntyl)nonanal (3x)

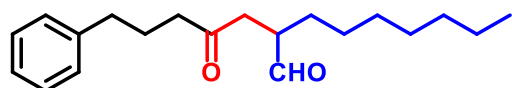

Colorless liquid after purification by column chromatography (petroleum ether : EtOAc = 20/1); 36.9 mg, 61% yield.  $^1\text{H}$  NMR (400 MHz, Chloroform-*d*)  $\delta$  9.70 (s, 1H), 7.36 – 7.22 (m, 2H), 7.25 – 7.10 (m, 3H), 2.96 – 2.75 (m, 2H), 2.62 (p,  $J = 7.0$  Hz, 2H), 2.54 – 2.33 (m, 2H), 2.12 (s, 2H), 1.99 – 1.83

(m, 2H), 1.56 (s, 2H), 1.44 – 1.17 (m, 10H), 0.92 – 0.84 (m, 3H).  $^{13}\text{C}$  NMR (100 MHz, Chloroform-*d*)  $\delta$  208.7, 203.6, 141.5, 128.5, 128.5, 128.4, 125.9, 53.4, 46.7, 42.8, 42.0, 41.3, 35.0, 31.7, 30.0, 29.6, 29.0, 28.6, 27.0, 25.2, 22.6, 14.1. IR (KBr,  $\text{cm}^{-1}$ ): 2924, 2858, 1713, 1454, 1408, 1356, 747, 689. HRMS (ESI<sup>+</sup>)  $m/z$ :  $[\text{M}+\text{H}]^+$  calcd for  $\text{C}_{20}\text{H}_{30}\text{NaO}_2^+$ : 325.2138 ; found: 325.2146.

### 2-(4-Chlorobutyl)-4-oxo-7-phenylheptanal (3y)

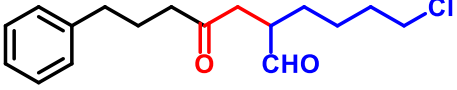 Colorless liquid after purification by column chromatography (petroleum ether : EtOAc = 20/1); 44.2 mg, 75% yield.  $^1\text{H}$  NMR (400 MHz, Chloroform-*d*)  $\delta$  9.70 (s, 1H), 7.35 – 7.27 (m, 2H), 7.23 – 7.07 (m, 3H), 3.53 (t,  $J = 6.5$  Hz, 2H), 2.97 – 2.86 (m, 1H), 2.84 (dd,  $J = 17.3, 8.1$  Hz, 1H), 2.62 (t,  $J = 7.5$  Hz, 2H), 2.61 – 2.37 (m, 3H), 2.02 – 1.86 (m, 2H), 1.89 – 1.65 (m, 3H), 1.56 – 1.38 (m, 3H).  $^{13}\text{C}$  NMR (100 MHz, Chloroform-*d*)  $\delta$  208.4, 203.0, 141.4, 128.5, 128.4, 126.0, 46.4, 44.5, 42.0, 41.2, 35.0, 32.3, 27.7, 25.1, 24.2. IR (KBr,  $\text{cm}^{-1}$ ): 2933, 2863, 1713, 1451, 1399, 1361, 750, 694. HRMS (ESI<sup>+</sup>)  $m/z$ :  $[\text{M}+\text{K}]^+$  calcd for  $\text{C}_{17}\text{H}_{23}\text{ClKO}_2^+$ : 333.1018 ; found: 333.1014.

### 2-Cyclohexyl-4-oxo-7-phenylheptanal (3z)

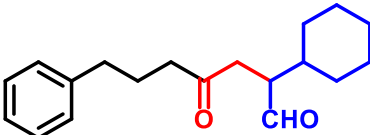 Colorless liquid after purification by column chromatography (petroleum ether : EtOAc = 20/1); 18.3 mg, 32% yield.  $^1\text{H}$  NMR (400 MHz, Chloroform-*d*)  $\delta$  9.74 (s, 1H), 7.36 – 7.15 (m, 2H), 7.19 – 7.10 (m, 3H), 2.99 – 2.77 (m, 3H), 2.70 – 2.57 (m, 2H), 2.54 – 2.36 (m, 2H), 2.36 – 2.24 (m, 2H), 2.12 (s, 1H), 1.91 (pd,  $J = 7.4, 2.7$  Hz, 2H), 1.83 – 1.64 (m, 2H), 1.55 (d,  $J = 15.8$  Hz, 2H), 1.36 – 1.18 (m, 2H), 1.14 – 0.98 (m, 2H).  $^{13}\text{C}$  NMR (100 MHz, Chloroform-*d*)  $\delta$  209.1, 204.0, 128.5, 128.5, 128.4, 125.9, 52.2, 42.8, 42.1, 38.4, 37.8, 35.0, 31.0, 29.9, 26.4, 26.4, 26.1, 25.2, 25.2. IR (KBr,  $\text{cm}^{-1}$ ): 2926, 2856, 1713, 1451, 1413, 1357, 743, 701. HRMS (ESI<sup>+</sup>)  $m/z$ :  $[\text{M}+\text{H}]^+$  calcd for  $\text{C}_{19}\text{H}_{27}\text{O}_2^+$ : 287.2006 ; found: 287.2014.

### 2-Isopropyl-4-oxo-7-phenylheptanal (3aa)

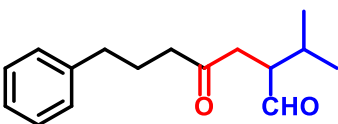 Colorless liquid after purification by column chromatography (petroleum ether : EtOAc = 20/1); 28.6 mg, 58% yield.  $^1\text{H}$  NMR (400 MHz, Chloroform-*d*)  $\delta$  9.74 (s, 1H), 7.31 – 7.27 (m, 2H), 7.21 – 7.17 (m, 3H), 2.96 – 2.92 (m, 1H), 2.86 (dd,  $J = 17.2, 9.7$  Hz, 1H), 2.64 – 2.60 (m, 2H), 2.54 – 2.41 (m, 2H), 2.26 (dd,  $J = 17.2, 2.9$  Hz, 1H), 2.20 – 2.13 (m, 1H), 1.96 – 1.88 (m, 2H), 0.99 (d,  $J = 6.9$  Hz, 3H), 0.90 (d,  $J = 6.9$  Hz, 3H).  $^{13}\text{C}$  NMR (101 MHz, Chloroform-*d*)  $\delta$  208.9, 203.8, 141.6, 128.5, 128.4, 125.9, 52.5, 42.1, 37.7, 35.0, 27.5, 25.2, 20.4, 19.3. IR (KBr,  $\text{cm}^{-1}$ ): 3026, 2962, 2935, 1712, 1496, 1454, 1373, 1242, 1180, 748, 702. HRMS (ESI<sup>+</sup>)  $m/z$ :  $[\text{M}+\text{H}]^+$  calcd for  $\text{C}_{17}\text{H}_{25}\text{O}_2^+$ : 261.1849 ; found: 261.1842.

### 2-(Tert-butyl)-4-oxo-7-phenylheptanal (3ab)

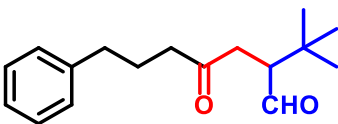 Colorless liquid after purification by column chromatography (petroleum ether : EtOAc = 20/1); 22.4 mg, 43% yield.  $^1\text{H}$  NMR (400 MHz, Chloroform-*d*)  $\delta$  9.91 (s, 1H), 7.28 (d,  $J = 6.9$  Hz, 2H), 7.20 – 7.14 (m, 3H), 2.91 (s, 1H), 2.64 – 2.58 (m, 1H), 2.51 – 2.38 (m, 2H), 2.11 (s, 1H), 1.95 – 1.86 (m, 2H),

1.57 (s, 2H), 1.00 (s, 9H).  $^{13}\text{C}$  NMR (100 MHz, Chloroform-*d*)  $\delta$  209.3, 204.7, 141.6, 128.5, 128.5, 128.4, 125.9, 56.0, 42.8, 42.0, 38.2, 35.0, 33.3, 29.9, 28.2, 25.2, 25.2. IR (KBr,  $\text{cm}^{-1}$ ): 2961, 2870, 1717, 1456, 1361, 750, 701. HRMS (ESI<sup>+</sup>)  $m/z$ :  $[\text{M}+\text{Na}]^+$  calcd for  $\text{C}_{17}\text{H}_{24}\text{O}_2\text{Na}^+$ : 283.1669; found: 283.1669.

### 7-Formyl-9-methyl-5-oxodecanenitrile (3ac)

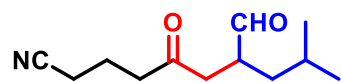

Colorless liquid after purification by column chromatography (dichloromethane/ethyl acetate = 50/1); 29.3 mg, 70% yield.  $^1\text{H}$  NMR (400 MHz, Chloroform-*d*)  $\delta$  9.69 – 9.65 (1H), 3.05 – 2.92 (m, 1H), 2.81 (q,  $J = 8.8$  Hz, 1H), 2.75 – 2.58 (m, 2H), 2.48 – 2.31 (m, 4H), 2.20 – 2.14 (s, 1H), 1.97 – 1.88 (m, 3H), 1.70 – 1.51 (m, 3H), 1.35 – 1.14 (m, 2H), 0.94 (q,  $J = 6.6$  Hz, 6H).  $^{13}\text{C}$  NMR (100 MHz, Chloroform-*d*)  $\delta$  207.3, 203.5, 119.4, 45.4, 41.8, 41.2, 40.7, 37.7, 25.9, 23.0, 22.3, 19.4, 16.5. IR (KBr,  $\text{cm}^{-1}$ ): 2956, 2914, 2322, 1713, 1524, 1454, 1373. HRMS (ESI<sup>+</sup>)  $m/z$ :  $[\text{M}+\text{Na}]^+$  calcd for  $\text{C}_{12}\text{H}_{19}\text{NO}_2\text{Na}^+$ : 232.1308; found: 232.1305.

### 7-Formyl-5-oxononanenitrile (3ad)

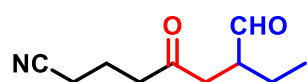

Colorless liquid after purification by column chromatography (dichloromethane/ethyl acetate = 50/1); 27.9 mg, 77% yield.  $^1\text{H}$  NMR (400 MHz, Chloroform-*d*)  $\delta$  9.68 (d,  $J = 1.4$  Hz, 1H), 2.97 – 2.88 (m, 1H), 2.91 – 2.79 (m, 1H), 2.69 (qtd,  $J = 18.2, 6.9, 1.5$  Hz, 2H), 2.41 (qdd,  $J = 9.9, 5.5, 3.0$  Hz, 4H), 1.93 (pd,  $J = 7.0, 1.6$  Hz, 2H), 1.85 – 1.72 (m, 1H), 1.69 – 1.47 (m, 2H), 0.96 (td,  $J = 7.5, 1.6$  Hz, 4H).  $^{13}\text{C}$  NMR (100 MHz, Chloroform-*d*)  $\delta$  207.20, 203.36, 119.25, 45.32, 41.71, 40.57, 37.56, 25.77, 22.86, 22.15, 19.26, 16.39. IR (KBr,  $\text{cm}^{-1}$ ): 2965, 2973, 2248, 1717, 1458, 1410, 1371. HRMS (ESI<sup>+</sup>)  $m/z$ :  $[\text{M}+\text{Na}]^+$  calcd for  $\text{C}_{10}\text{H}_{15}\text{NO}_2\text{Na}^+$ : 204.0995; found: 204.0995.

### 7-Formyl-5-oxoundecanenitrile (3ae)

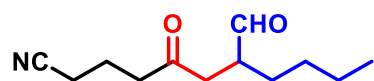

Colorless liquid after purification by column chromatography (dichloromethane/ethyl acetate = 50/1); 32.2 mg, 77% yield.  $^1\text{H}$  NMR (400 MHz, Chloroform-*d*)  $\delta$  9.67 (d,  $J = 2.8$  Hz, 1H), 2.95 (ddp,  $J = 9.8, 6.9, 3.2$  Hz, 1H), 2.84 (ddd,  $J = 17.2, 9.0, 2.9$  Hz, 1H), 2.69 (dddd,  $J = 25.0, 16.0, 10.6, 6.9$  Hz, 2H), 2.41 (ddp,  $J = 9.7, 6.9, 3.3$  Hz, 3H), 1.93 (pd,  $J = 7.0, 2.8$  Hz, 2H), 1.74 (dt,  $J = 14.4, 7.2$  Hz, 1H), 1.52 – 1.39 (m, 1H), 1.32 (tt,  $J = 7.3, 3.6$  Hz, 4H), 0.90 (td,  $J = 6.9, 2.9$  Hz, 3H).  $^{13}\text{C}$  NMR (100 MHz, Chloroform-*d*)  $\delta$  207.2, 203.3, 119.3, 47.0, 41.1, 40.6, 29.1, 28.1, 22.6, 19.2, 16.4, 13.8. IR (KBr,  $\text{cm}^{-1}$ ): 2926, 2860, 2248, 1720, 1458, 1413, 1378, 1095. HRMS (ESI<sup>+</sup>)  $m/z$ :  $[\text{M}+\text{Na}]^+$  calcd for  $\text{C}_{12}\text{H}_{19}\text{NO}_2\text{Na}^+$ : 232.1308; found: 232.1307.

### 7-Formyl-5-oxotetradecanenitrile (3af)

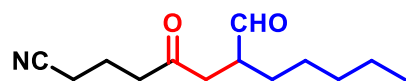

Colorless liquid after purification by column chromatography (dichloromethane/ethyl acetate = 50/1); 33.5 mg, 75% yield.  $^1\text{H}$  NMR (400 MHz, Chloroform-*d*)  $\delta$  9.68 (s, 1H), 3.01 – 2.90 (m, 1H), 2.84 (ddd,  $J = 17.2, 9.0, 1.2$  Hz, 1H), 2.77 – 2.56 (m, 2H), 2.50 – 2.33 (m, 3H), 2.03 – 1.84 (m, 2H), 1.79 – 1.66 (m, 1H), 1.43 (dt,  $J = 13.9, 7.2$  Hz, 1H), 1.37 – 1.23 (m, 6H), 0.96 – 0.81 (m, 3H).  $^{13}\text{C}$  NMR (100 MHz, Chloroform-*d*)  $\delta$  207.2, 203.3, 119.3, 47.1, 41.1, 40.6, 31.7, 28.4, 26.7, 22.4, 19.2, 16.4, 13.9. IR (KBr,  $\text{cm}^{-1}$ ): 2930, 2853, 2244, 1713, 1462, 1417, 1371, 1095.

HRMS (ESI<sup>+</sup>) *m/z*: [M+Na]<sup>+</sup> calcd for C<sub>13</sub>H<sub>21</sub>NO<sub>2</sub>Na<sup>+</sup>: 246.1465; found: 246.1456.

**11-Chloro-7-formyl-5-oxoundecanenitrile (3ag)**

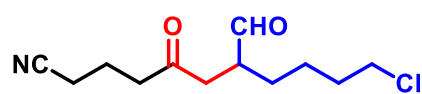

Colorless liquid after purification by column chromatography (dichloromethane/ethyl acetate = 50/1); 36.8 mg, 80.4% yield. <sup>1</sup>H NMR (400 MHz, Chloroform-*d*) δ 9.67 (s, 1H), 4.10 (q, *J* = 7.2 Hz, 1H), 3.53 (td, *J* = 6.4, 2.3 Hz, 3H),

3.00 – 2.79 (m, 2H), 2.79 – 2.48 (m, 4H), 2.48 – 2.40 (m, 1H), 2.44 – 2.28 (m, 3H), 2.04 – 1.90 (m, 3H), 1.93 – 1.85 (m, 1H), 1.89 – 1.69 (m, 4H), 1.60 – 1.40 (m, 4H), 1.24 (td, *J* = 7.1, 0.7 Hz, 2H). <sup>13</sup>C NMR (100 MHz, Chloroform-*d*) δ 206.9, 202.7, 119.2, 60.3, 46.8, 44.5, 41.1, 40.6, 32.2, 27.6, 24.2, 19.2, 16.3. IR (KBr, cm<sup>-1</sup>): 2939, 2862, 2245, 1712, 1411, 1373, 1195, 1099, 736, 648. HRMS (ESI<sup>+</sup>) *m/z*: [M+K]<sup>+</sup> calcd for C<sub>12</sub>H<sub>21</sub>NO<sub>2</sub>K<sup>+</sup>: 285.0892; found: 285.0884.

**(3*S*,8*S*,9*S*,10*R*,13*R*,14*S*,17*R*)-17-((2*S*,5*R*)-5-Ethyl-6-methylheptan-2-yl)-10,13-dimethyl-2,3,4,7,8,9,10,11,12,13,14,15,16,17-tetradecahydro-1*H*-cyclopetroleum ethernta[*a*]phenanthren-3-yl 7-benzyl-5,8-dioxooctanoate (3ah)**

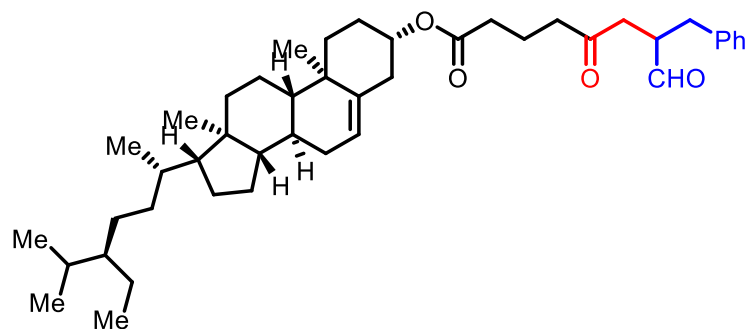

Transparent viscous liquid after purification by column chromatography (petroleum ether : EtOAc = 20/1); 94.9 mg, 72% yield. <sup>1</sup>H NMR (400 MHz, Chloroform-*d*) δ 9.77 (s, 1H), 7.29 (t, *J* = 7.1 Hz, 2H), 7.22 (t, *J* = 7.3 Hz,

1H), 7.14 (d, *J* = 6.9 Hz, 2H), 5.35 (d, *J* = 4.6 Hz, 1H), 4.58 (tt, *J* = 11.8, 4.3 Hz, 1H), 3.26-3.17 (m, 1H), 3.07 (q, *J* = 6.9 Hz, 1H), 2.81 – 2.63 (m, 2H), 2.54 – 2.34 (m, 3H), 2.32 – 2.18 (m, 4H), 2.04 – 1.91 (m, 2H), 1.88 – 1.76 (m, 5H), 1.65 (q, *J* = 6.9 Hz, 3H), 1.59 – 1.43 (m, 6H), 1.41 (s, 2H), 1.34 – 1.19 (m, 4H), 1.19 – 1.05 (m, 4H), 1.00 (s, 4H), 0.93 – 0.87 (m, 4H), 0.87 – 0.77 (m, 10H), 0.66 (s, 3H). <sup>13</sup>C NMR (100 MHz, Chloroform-*d*) δ 207.9, 202.8, 172.5, 139.6, 137.9, 128.9, 128.7, 126.8, 122.7, 73.9, 56.6, 55.9, 49.9, 48.4, 45.8, 42.3, 41.6, 40.8, 39.7, 38.1, 36.9, 36.5, 36.1, 34.5, 33.9, 33.5, 31.9, 31.8, 29.0, 28.2, 27.7, 26.8, 25.9, 24.3, 22.9, 20.9, 19.8, 19.3, 18.9, 18.8, 18.7, 11.9, 11.8. IR (KBr, cm<sup>-1</sup>): 2954, 2870, 1728, 1454, 1377, 1253, 1176, 736, 702. HRMS (ESI<sup>+</sup>) *m/z*: [M+Na]<sup>+</sup> calcd for C<sub>44</sub>H<sub>66</sub>O<sub>4</sub>Na<sup>+</sup>: 681.4853; found: 681.4845.

**(4*S*,5'*R*,6*aS*,8*aS*,8*bR*,9*S*,10*R*,11*aS*,12*aS*,12*bR*)-5',6*a*,8*a*,9-Tetramethyl-2*a*,3,3',4,4',5,5',6,6*a*,6*b*,6',7,8,8*a*,8*b*,9,11*a*,12,12*a*,12*b*-icosahydrospiro[naphtho[2',1':4,5]indeno[2,1-*b*]furan-10,2'-pyran]-4-yl 8-benzyl-6,9-dioxononanoate (3ai)**

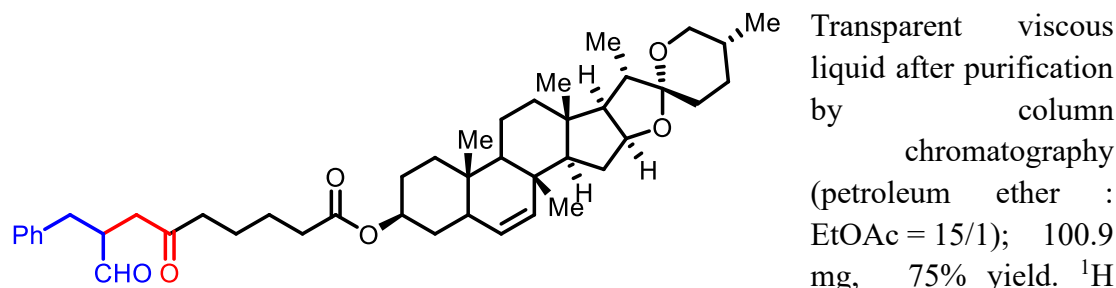

Transparent viscous liquid after purification by column chromatography (petroleum ether : EtOAc = 15/1); 100.9 mg, 75% yield.  $^1\text{H}$

NMR (400 MHz, Chloroform-*d*)  $\delta$  9.78 (s, 1H), 7.30 (t,  $J = 7.3$  Hz, 2H), 7.26 – 7.20 (m, 1H), 7.15 (d,  $J = 6.9$  Hz, 2H), 5.42 – 5.29 (1H), 4.65 – 4.52 (m, 1H), 4.41 (q,  $J = 7.5$  Hz, 1H), 3.47 (dd,  $J = 10.7, 2.5$  Hz, 1H), 3.37 (t,  $J = 11.0$  Hz, 1H), 3.27 – 3.17 (m, 1H), 3.09 (dd,  $J = 14.0, 6.2$  Hz, 1H), 2.86 – 2.64 (m, 2H), 2.56 – 2.33 (m, 3H), 2.33 – 2.21 (m, 4H), 2.06 – 1.92 (m, 2H), 1.91 – 1.74 (m, 6H), 1.66 – 1.57 (m, 7H), 1.56 – 1.45 (m, 4H), 1.42 (s, 2H), 1.35 – 1.23 (m, 2H), 1.23 – 1.06 (m, 3H), 1.03 (s, 3H), 0.97 (d,  $J = 6.9$  Hz, 3H), 0.79 (d,  $J = 5.9$  Hz, 6H).  $^{13}\text{C}$  NMR (100 MHz, Chloroform-*d*)  $\delta$  207.9, 202.8, 172.5, 139.6, 137.9, 128.9, 128.7, 126.8, 122.4, 109.3, 80.8, 73.8, 66.8, 61.9, 56.4, 49.8, 48.4, 41.6, 41.5, 40.8, 40.2, 39.7, 38.0, 36.9, 36.7, 34.5, 33.4, 31.9, 31.8, 31.3, 30.3, 28.7, 27.7, 26.9, 20.8, 19.3, 18.8, 17.1, 16.3, 14.5. IR (KBr,  $\text{cm}^{-1}$ ): 2947, 2900, 1728, 1454, 1377, 1176, 1053, 983, 898, 736, 702. HRMS (ESI $^+$ )  $m/z$ :  $[\text{M}+\text{Na}]^+$  calcd for  $\text{C}_{44}\text{H}_{62}\text{O}_6\text{Na}^+$ : 709.4439; found: 709.4438.

**(3R,4S,5R,6R)-3,4,5-Tris(benzyloxy)-6-((benzyloxy)methyl)tetrahydro-2H-pyran-2-yl-7-benzyl-5,8-dioxooctanoate (3aj)**

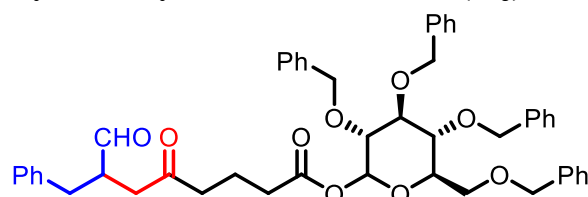

Transparent viscous liquid after purification by column chromatography (petroleum ether : EtOAc = 5/1); 112.2 mg, 72 % yield.

$^1\text{H}$  NMR (400 MHz, Chloroform-*d*)  $\delta$  9.79 – 9.72 (m, 1H), 7.43 – 7.27 (m, 24H), 7.19 – 7.11 (m, 5H), 6.47 – 5.58 (m, 1H), 5.01 – 4.91 (m, 1H), 4.91 – 4.71 (m, 4H), 4.70 – 4.58 (m, 2H), 4.52 (dd,  $J = 21.3, 11.2$  Hz, 2H), 3.98 – 3.83 (m, 1H), 3.82 – 3.51 (m, 6H), 3.29 – 3.12 (m, 1H), 3.11 – 2.98 (m, 1H), 2.80 – 2.59 (m, 2H), 2.55 – 2.18 (m, 6H), 2.14 – 2.00 (m, 1H), 1.96 – 1.76 (m, 2H), 1.32 – 1.23 (m, 1H), 0.95 – 0.78 (m, 2H).  $^{13}\text{C}$  NMR (100 MHz, Chloroform-*d*)  $\delta$  207.7, 202.7, 171.5, 138.5, 138.2, 138.0, 137.9, 137.8, 137.7, 137.5, 128.8, 128.7, 128.4, 128.1, 127.9, 127.8, 127.7, 127.65, 127.61, 126.7, 93.9, 89.9, 84.7, 81.6, 80.9, 78.9, 75.6, 75.4, 75.2, 74.9, 73.5, 73.4, 73.1, 72.6, 67.9, 48.2, 42.3, 40.7, 34.4, 33.1, 32.9, 18.5, 18.2. IR (KBr,  $\text{cm}^{-1}$ ): 2981, 2858, 1743, 1708, 1494, 1452, 1355, 1070, 1024, 906, 734, 696. HRMS (ESI $^+$ )  $m/z$ :  $[\text{M}+\text{Na}]^+$  calcd for  $\text{C}_{49}\text{H}_{52}\text{O}_9\text{Na}^+$ : 807.2504; found: 807.3484.

**(2R,3R,4R,5R)-5-((Benzyloxy)methyl)-3-((7-benzyl-5,8-dioxooctanoyl)oxy)tetrahydrofuran-2,4-diyl-dibenzoate (3ak)**

Transparent viscous liquid after purification by column chromatography (petroleum ether : EtOAc = 3/1); 106.7 mg, 76% yield.  $^1\text{H}$  NMR (400 MHz, Chloroform-*d*)  $\delta$  9.67 (s, 1H), 8.14 – 8.01 (m, 7H), 7.63 – 7.52 (m, 4H), 7.50 – 7.32 (m, 8H), 7.29 – 7.16 (m, 4H), 7.09 (d,  $J = 6.9$  Hz, 2H), 6.77 (d,  $J = 5.5$  Hz, 1H), 5.76 (d,  $J = 7.8$  Hz, 1H), 5.54 (dd,  $J = 6.6, 4.3$  Hz, 1H), 4.84 (q,  $J = 2.9$  Hz, 1H), 4.64 (ddd,  $J = 42.2, 12.2, 3.1$



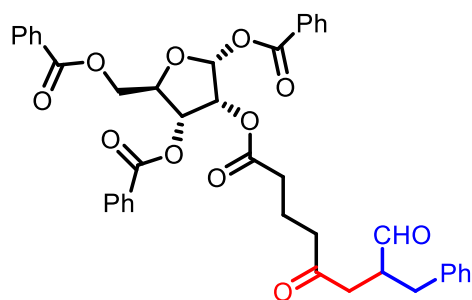

Hz, 2H), 4.10 (q,  $J = 7.2$  Hz, 2H), 3.16 – 3.06 (m, 1H), 3.00 (q,  $J = 6.7$  Hz, 1H), 2.65 – 2.52 (2H), 2.43 – 2.14 (m, 6H), 2.06 – 1.96 (3H), 1.77 – 1.65 (m, 2H), 1.24 (t,  $J = 7.3$  Hz, 4H).  $^{13}\text{C}$  NMR (100 MHz, Chloroform- $d$ )  $\delta$  207.5, 202.6, 171.6, 166.0, 165.6, 165.1, 137.8, 133.7, 133.5, 133.4, 129.9, 129.8, 129.7, 129.5, 129.3, 129.1, 128.9, 128.7, 128.6, 128.5, 128.4, 128.4, 126.7, 94.7, 82.7, 82.7, 70.7, 70.6, 63.9, 60.3, 48.3, 41.2, 40.6, 34.4, 32.4, 21.0, 18.1, 14.1. IR (KBr,  $\text{cm}^{-1}$ ): 2924, 2370, 2337, 1714, 1558, 1508, 1458, 1267, 1112, 1069, 1024, 709, 491, 420. HRMS (ESI $^{+}$ )  $m/z$ :  $[\text{M}+\text{Na}]^{+}$  calcd for  $\text{C}_{41}\text{H}_{38}\text{O}_{11}\text{Na}^{+}$ : 729.2306; found: 729.2291.

**(3a*S*,4*R*,6*R*,6a*S*)-6-((*R*)-2,2-Dimethyl-1,3-dioxolan-4-yl)-2,2-dimethyltetrahydrofuro[3,4-*d*][1,3]dioxol-4-yl 7-benzyl-5,8-dioxooctanoate (3a)**

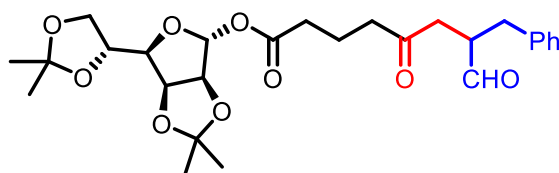

Transparent viscous liquid after purification by column chromatography (petroleum ether : EtOAc = 3/1); 73.6 mg, 73% yield.  $^1\text{H}$  NMR (400 MHz, Chloroform- $d$ )  $\delta$  9.77 (s, 1H), 7.30 (t,  $J = 7.1$  Hz, 2H), 7.23 (t,  $J = 7.3$  Hz, 1H), 7.15 (d,  $J = 7.3$  Hz, 2H), 6.14 – 6.08 (m, 1H), 4.90 – 4.79 (1H), 4.67 (q,  $J = 2.9$  Hz, 1H), 4.45 – 4.34 (m, 1H), 4.11 – 4.05 (1H), 4.05 – 3.97 (1H), 3.29 – 3.17 (m, 1H), 3.09 (dd,  $J = 14.0, 6.2$  Hz, 1H), 2.84 – 2.61 (m, 2H), 2.58 – 2.34 (m, 4H), 2.30 (t,  $J = 7.1$  Hz, 2H), 1.94 – 1.78 (m, 2H), 1.46 (d,  $J = 12.3$  Hz, 6H), 1.35 (d,  $J = 13.7$  Hz, 6H).  $^{13}\text{C}$  NMR (100 MHz, Chloroform- $d$ )  $\delta$  207.8, 202.7, 171.5, 137.8, 128.9, 128.7, 126.8, 113.2, 109.3, 100.6, 85.0, 82.2, 79.2, 72.8, 66.8, 48.5, 41.3, 40.8, 34.5, 33.1, 32.9, 27.0, 25.9, 25.1, 24.6, 18.3. IR (KBr,  $\text{cm}^{-1}$ ): 3433, 2987, 2941, 1714, 1726, 1708, 1635, 1454, 1369, 1209, 1161, 1066, 960, 848, 702. HRMS (ESI $^{+}$ )  $m/z$ :  $[\text{M}+\text{Na}]^{+}$  calcd for  $\text{C}_{27}\text{H}_{36}\text{O}_9\text{Na}^{+}$ : 527.2252; found: 527.2257.

**3.3 Synthesis of diverse heterocycles starting from compound 3h** [3 – 4]

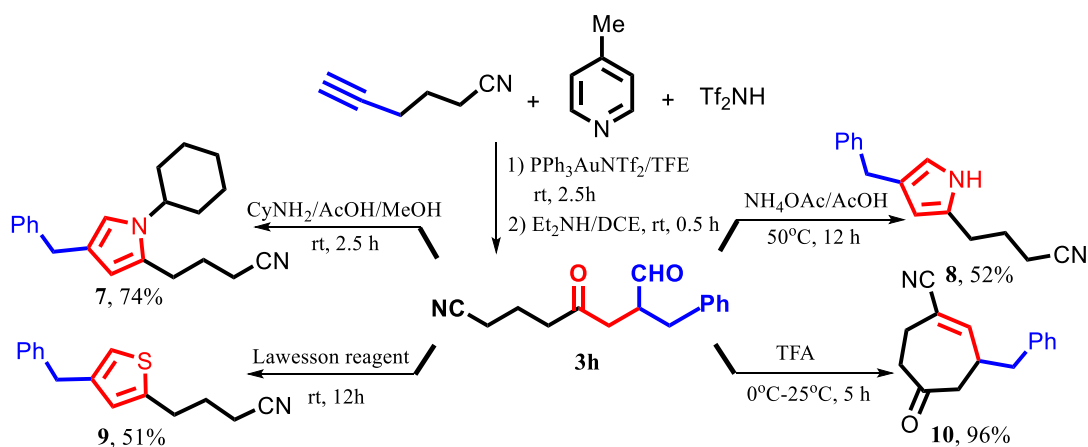

**4-(4-Benzyl-1-cyclohexyl-1H-pyrrol-2-yl)butanenitrile (7)**

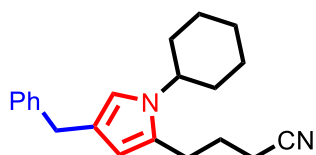

Compound 3h (0.20 mmol, 1.0 equiv) and cyclohexylamine (0.40 mmol, 2.0 equiv) were dissolved in methanol (2 mL). At 0°C, the glacial acetic acid (0.40 mmol, 2.0 equiv) was slowly added dropwise. The reaction mixture was kept at this temperature for 15 min. Then the mixture was warmed to room temperature and stirred for 2.5 h. The reaction was then diluted with brine and dichloromethane, separated and extracted twice with dichloromethane. The combined solution was dried with anhydrous MgSO<sub>4</sub>. Then the solvents were evaporated and the chromatography on silica gel of the residue gave the target product 7. Colorless liquid after purification by column chromatography (petroleum ether : EtOAc = 5/1); 45.4 mg, 74% yield. <sup>1</sup>H NMR (400 MHz, Chloroform-*d*) δ 7.31 – 7.15 (m, 5H), 6.43 (s, 1H), 5.71 (s, 1H), 3.78 (s, 2H), 3.74 – 3.64 (m, 1H), 2.69 (t, *J* = 7.4 Hz, 2H), 2.42 (t, *J* = 7.0 Hz, 2H), 2.02 – 1.83 (m, 6H), 1.78 – 1.69 (m, 1H), 1.57 (qd, *J* = 12.4, 3.1 Hz, 2H), 1.47 – 1.32 (m, 2H), 1.29 – 1.16 (m, 1H). <sup>13</sup>C NMR (100 MHz, Chloroform-*d*) δ 129.4, 128.6, 128.2, 125.6, 121.8, 119.6, 114.7, 106.1, 54.8, 34.6, 33.6, 25.9, 25.0, 24.7, 16.7. IR (KBr, cm<sup>-1</sup>): 2936, 2851, 2319, 2243, 1699, 1495, 1452, 1413, 1136, 702. HRMS (ESI<sup>+</sup>) *m/z*: [M+H]<sup>+</sup> calcd for C<sub>21</sub>H<sub>28</sub>N<sub>2</sub><sup>+</sup>: 307.2169; found: 307.2163.

#### 4-(4-Benzyl-1H-pyrrol-2-yl)butanenitrile (8)

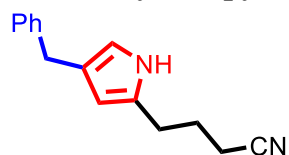

A 15mL reaction tube was charged with compound 3h (0.2 mmol, 1.0 equiv) and ammonium acetate (1mmol, 5.0 equiv) in ethanol (2 mL), under an argon atmosphere. Glacial acetic acid (17.8 μL, 0.312 mmol, 4.0 equiv) was added dropwise to the mixture, and then the reaction tube was put into the 50°C oil bath and was kept for 12 h until the completion of starting material. For the work-up, solid sodium carbonate (4 equiv) was added into the mixture and stirred for 15 min. The reaction was then diluted with brine and dichloromethane, separated and extracted twice with dichloromethane. The combined solution was dried with anhydrous MgSO<sub>4</sub>. Then the solvents were evaporated and the chromatography on silica gel of the residue gave the target product 8. Colorless liquid after purification by column chromatography (petroleum ether : EtOAc = 10/1); 20.2 mg, 45% yield. <sup>1</sup>H NMR (400 MHz, Chloroform-*d*) δ 7.28 (d, *J* = 7.3 Hz, 2H), 7.24 – 7.14 (m, 3H), 6.40 (s, 1H), 5.79 (s, 1H), 3.78 (s, 2H), 2.71 (t, *J* = 7.3 Hz, 2H), 2.34 (t, *J* = 7.1 Hz, 2H), 1.99 – 1.84 (m, 2H). <sup>13</sup>C NMR (100 MHz, Chloroform-*d*) δ 142.1, 129.8, 128.9, 128.6, 128.3, 125.7, 123.7, 119.5, 114.7, 106.7, 33.5, 26.5, 25.4, 16.4. IR (KBr, cm<sup>-1</sup>): 2924, 2850, 2345, 2310, 1720, 1512, 1454, 1060, 702. HRMS (ESI<sup>+</sup>) *m/z*: [M+H]<sup>+</sup> calcd for C<sub>15</sub>H<sub>17</sub>N<sub>2</sub><sup>+</sup>: 255.1386; found: 255.1379.

#### 4-(4-Benzylthiophen-2-yl)butanenitrile (9)

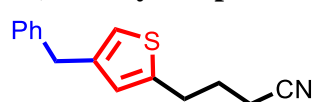

Compound 3h (0.20 mmol, 1.0 equiv) was dissolved in anhydrous THF (2 mL). The reaction mixture was cooled to 0°C, and at this temperature Lawesson's reagent (0.40 mmol, 2.0 equiv) was added in portions over 10 min. The reaction was stirred for another 30 min, and then warmed to room temperature and stirred until completion of 3 g. After 12 h, the solvents were evaporated carefully under vacuum and the chromatography on silica gel of the residue gave the target product 9. Colorless liquid after purification by

column chromatography (petroleum ether : EtOAc = 10/1); 24.1 mg, 50% yield.  $^1\text{H}$  NMR (400 MHz, Chloroform-*d*)  $\delta$  7.34 – 7.26 (t,  $J$  = 7.4 Hz, 2H), 7.26 – 7.17 (m, 2H), 6.76 – 6.71 (s, 1H), 6.66 – 6.62 (s, 1H), 3.92 – 3.87 (s, 2H), 2.98 – 2.84 (t,  $J$  = 7.3 Hz, 2H), 2.44 – 2.28 (t,  $J$  = 7.1 Hz, 2H), 2.07 – 1.91 (p,  $J$  = 7.3 Hz, 2H), 0.09 – 0.05 (s, 1H).  $^{13}\text{C}$  NMR (101 MHz, Chloroform-*d*)  $\delta$  142.4, 141.5, 140.4, 132.3, 132.2, 128.7, 128.5, 126.8, 126.2, 119.6, 119.2, 36.8, 28.7, 27.1, 16.3, 1.0. IR (KBr,  $\text{cm}^{-1}$ ): 2379, 2324, 1869, 1723, 1657, 1557, 1505, 710, 674. HRMS (ESI<sup>+</sup>)  $m/z$ :  $[\text{M}+\text{Na}]^+$  calcd for  $\text{C}_{15}\text{H}_{15}\text{NSNa}^+$ : 264.0817; found: 264.0807.

### 3-Benzyl-5-oxocyclohept-1-ene-1-carbonitrile (10)

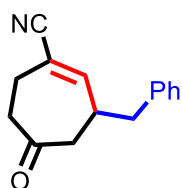

Compound 3h (0.20 mmol, 1.0 equiv) was dissolved in cold trifluoroacetic acid (2 mL). The reaction mixture was stirred at 0°C for 30 min. Then the mixture was warmed to room temperature and stirred until completion of 3h. After 5h, the solvents were evaporated carefully under vacuum and the chromatography on silica gel of the residue gave the target product 10. Colorless liquid after purification by column chromatography (petroleum ether : EtOAc = 5/1); 43.3 mg, 96% yield.  $^1\text{H}$  NMR (400 MHz, Chloroform-*d*)  $\delta$  7.43 (t,  $J$  = 1.4 Hz, 1H), 7.37 – 7.29 (m, 2H), 7.28 – 7.24 (m, 1H), 7.19 (d,  $J$  = 6.9 Hz, 2H), 3.32 – 3.10 (m, 1H), 2.80 (dd,  $J$  = 7.5, 1.6 Hz, 2H), 2.66 – 2.48 (m, 5H), 2.17 (dd,  $J$  = 19.2, 2.3 Hz, 1H).  $^{13}\text{C}$  NMR (101 MHz, Chloroform-*d*)  $\delta$  208.0, 163.1, 141.9, 138.7, 128.8, 128.6, 126.6, 118.9, 41.0, 41.0, 40.6, 21.2, 15.9. IR (KBr,  $\text{cm}^{-1}$ ): 3028, 2920, 2850, 2254, 1701, 1635, 1600, 1496, 1454, 1357, 1199, 1064, 748, 705, 493. HRMS (ESI<sup>+</sup>)  $m/z$ :  $[\text{M}+\text{Na}]^+$  calcd for  $\text{C}_{15}\text{H}_{15}\text{NONa}^+$ : 248.1046; found: 248.1038.

### 4-(1,4-Dibenzyl-1H-pyrrol-2-yl)butanenitrile (11)

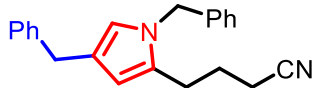

Compound 3h (0.20 mmol, 1.0 equiv) and benzylamine (0.40 mmol, 2.0 equiv) were dissolved in methanol (2 mL). At 0°C, the glacial acetic acid (0.40 mmol, 2.0 equiv) was slowly added dropwise. The reaction mixture was kept at this temperature for 15 min. Then the mixture was warmed to room temperature and stirred for 2.5 h. The reaction was then diluted with brine and dichloromethane, separated and extracted twice with dichloromethane. The combined solution was dried with anhydrous  $\text{MgSO}_4$ . Then the solvents were evaporated and the chromatography on silica gel of the residue gave the target product 11. Colorless liquid after purification by column chromatography (petroleum ether : EtOAc = 10/1); 53.4 mg, 85% yield.  $^1\text{H}$  NMR (400 MHz, Chloroform-*d*)  $\delta$  7.38 – 7.15 (m, 8H), 7.04 – 6.94 (m, 2H), 6.41 (s, 1H), 5.81 (s, 1H), 4.96 (s, 2H), 3.80 (s, 2H), 2.56 (t,  $J$  = 7.5 Hz, 2H), 2.29 (t,  $J$  = 7.1 Hz, 2H), 1.88 – 1.73 (m, 2H).  $^{13}\text{C}$  NMR (100 MHz, Chloroform-*d*)  $\delta$  142.2, 138.3, 130.2, 128.8, 128.6, 128.2, 127.4, 126.2, 125.7, 122.3, 119.7, 119.4, 107.6, 50.2, 33.4, 24.9, 24.5, 16.5. IR (KBr,  $\text{cm}^{-1}$ ): 3029, 2928, 2318, 1700, 1496, 1447, 1352, 730, 698. HRMS (ESI<sup>+</sup>)  $m/z$ :  $[\text{M}+\text{Na}]^+$  calcd for  $\text{C}_{22}\text{H}_{22}\text{N}_2\text{Na}^+$  : 315.1856 ; found: 315.1848.

## 4. Evaluation of proliferation inhibitory activity of the compounds on tumor cells<sup>[5]</sup>

In order to investigate the relationship between protein-tyrosine kinase inhibitory activity and antitumor activity of the compounds, we further investigated whether the

compounds had inhibitory effects on tumor cell proliferation. The tumor cells we selected were human ovarian cancer cells (SKOV3), human breast cancer cells (MCF-7) and human liver cancer cells (HepG2). It was used to test whether compound 10 could inhibit the proliferation activity of cancer cells after administration.

Typically, Take cells at logarithmic growth stage and configure them into  $5 \times 10^4$   $\mu\text{mol/L}$  cell suspension, planking on 96 well plate, adding PBS solution in a circle of holes around,  $100 \mu\text{L}$  for each hole. To eliminate the edge effect. Select 5 adjacent wells, and add DMEM high sugar medium (containing 10% fetal bovine serum) into the wells,  $100 \mu\text{L}$  for each hole. As a contrast, eliminate the influence of background values. Add prepared cell suspension into the remaining holes,  $100 \mu\text{L}$  for each hole. To ensure that the cell concentration in the hole is uniform, after adding a row of holes, blow the cell suspension with a straw and add all the cells, write a mark, and put the 96 hole plate into a  $37^\circ\text{C}$ , 5%  $\text{CO}_2$  cell incubator for 24 hours.

Next, compound 10 was weighed and added biological DMSO solution to prepare compound mother solution of  $100 \mu\text{M/mL}$ , mix evenly, use gradient dilution method, dilute with DMEM high sugar medium, and prepare 80, 40, 20, 10, 5  $\mu\text{M/mL}$  successively for standby. The prepared drug solution was administered to the cells, and after the treatment, the 96-well plates were placed in a  $37^\circ\text{C}$ , 5%  $\text{CO}_2$  cell incubator for 48 h.

Finally, the 96-well plate was removed from the incubator,  $10 \mu\text{L}$  CCK-8 solution was added to each well, and then incubated again in a  $37^\circ\text{C}$  cell incubator with 5%  $\text{CO}_2$  for 1–3 h. The operating environment was required to be shielded from light during the entire operation. A 96-well plates was removed from the cell incubator and the absorbance (OD) value was measured at 450 nm using a microplate reader (Fig.S1).

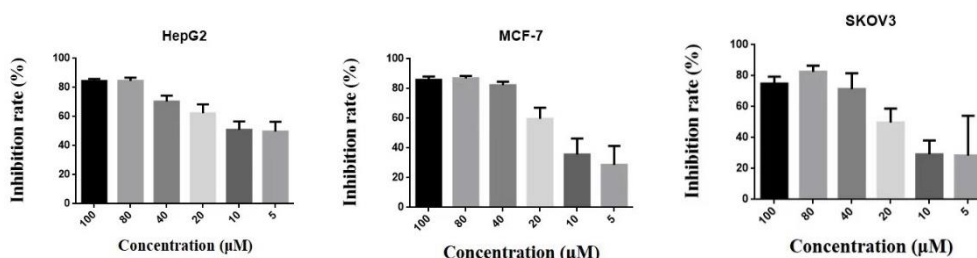

**Fig.S1** MTS assay showed the inhibitory effect of HepG2 cell lines, McF-7 cell lines and SKOV3 cell lines at different concentrations after compound 10 treatment.

Calculation formula:

$$\text{Inhibition rate} = \frac{1 - (\text{absorbance value after administration} - \text{background value})}{(\text{blank control value} - \text{background value})} \times 100\%$$

| Compound | HepG2                              | MCF-7                              | SKOV3                              |
|----------|------------------------------------|------------------------------------|------------------------------------|
|          | $\text{IC}_{50}$ ( $\mu\text{M}$ ) | $\text{IC}_{50}$ ( $\mu\text{M}$ ) | $\text{IC}_{50}$ ( $\mu\text{M}$ ) |
| 10       | 36.86                              | 18.94                              | 21.85                              |

## 5. Reference

- [1] Huang M, Zhang L, Pan T, Luo S. *Science*. **2022**: 375, 869 – 874.
- [2] Xu Z, Chen H, Wang Z, Ying A, Zhang L. *J Am Chem Soc*, **2016**, 138: 5515 – 5518.
- [3] García-Santos WH, Mateus-Ruiz JB, Cordero-Vargas A. *Org Lett*, **2019**, 21: 4092 – 4096.
- [4] Zhou W, Voituriez A. *Org Lett*, **2021**, 23: 247 – 252.
- [5] Ganapathy-Kanniappan S, Geschwind JFH, Kunjithapatham R, Buijs M, Syed LH, Rao PP, Ota S, Vali M. *ASSAY and Drug Development Technologies*, 2010, 8: 258–262.

## 6. NMR spectra

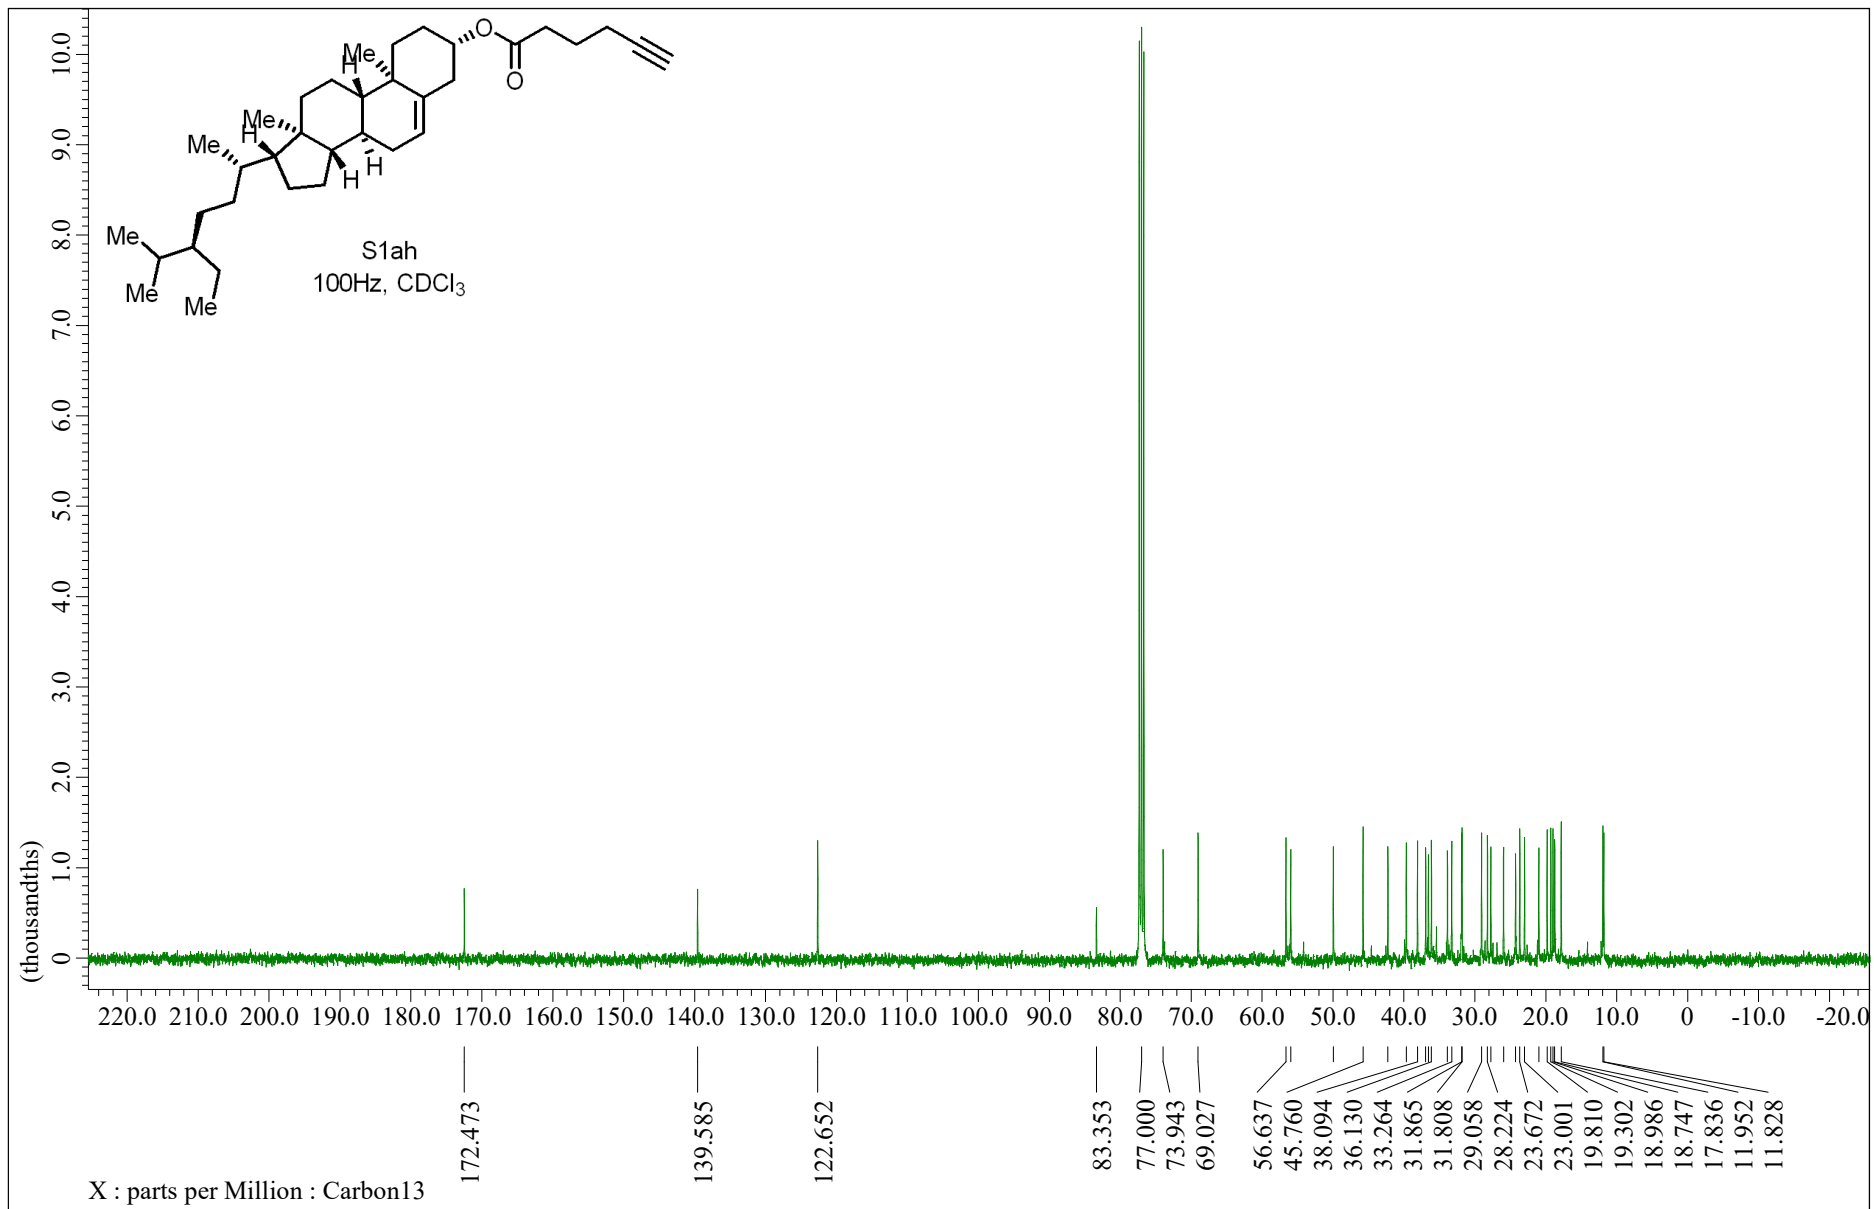

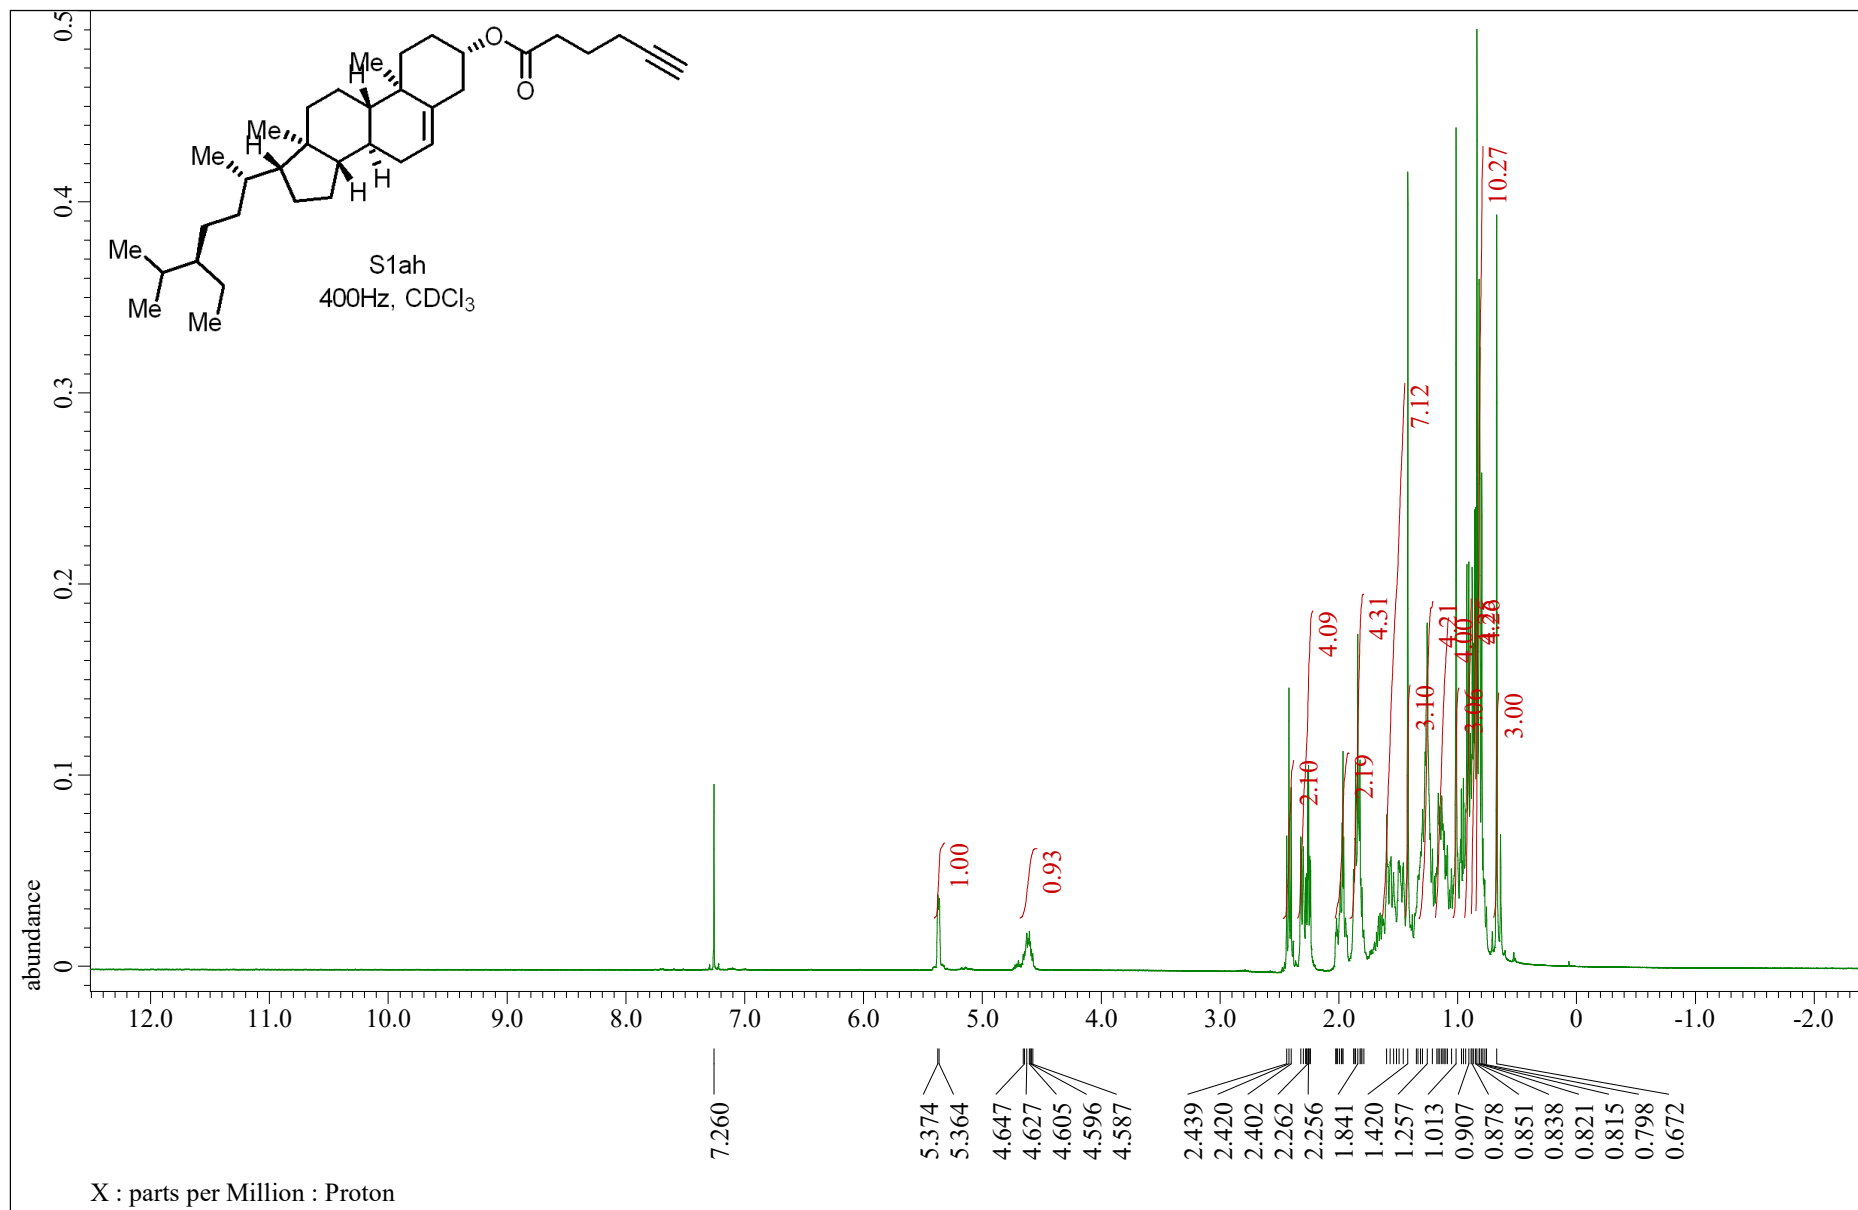

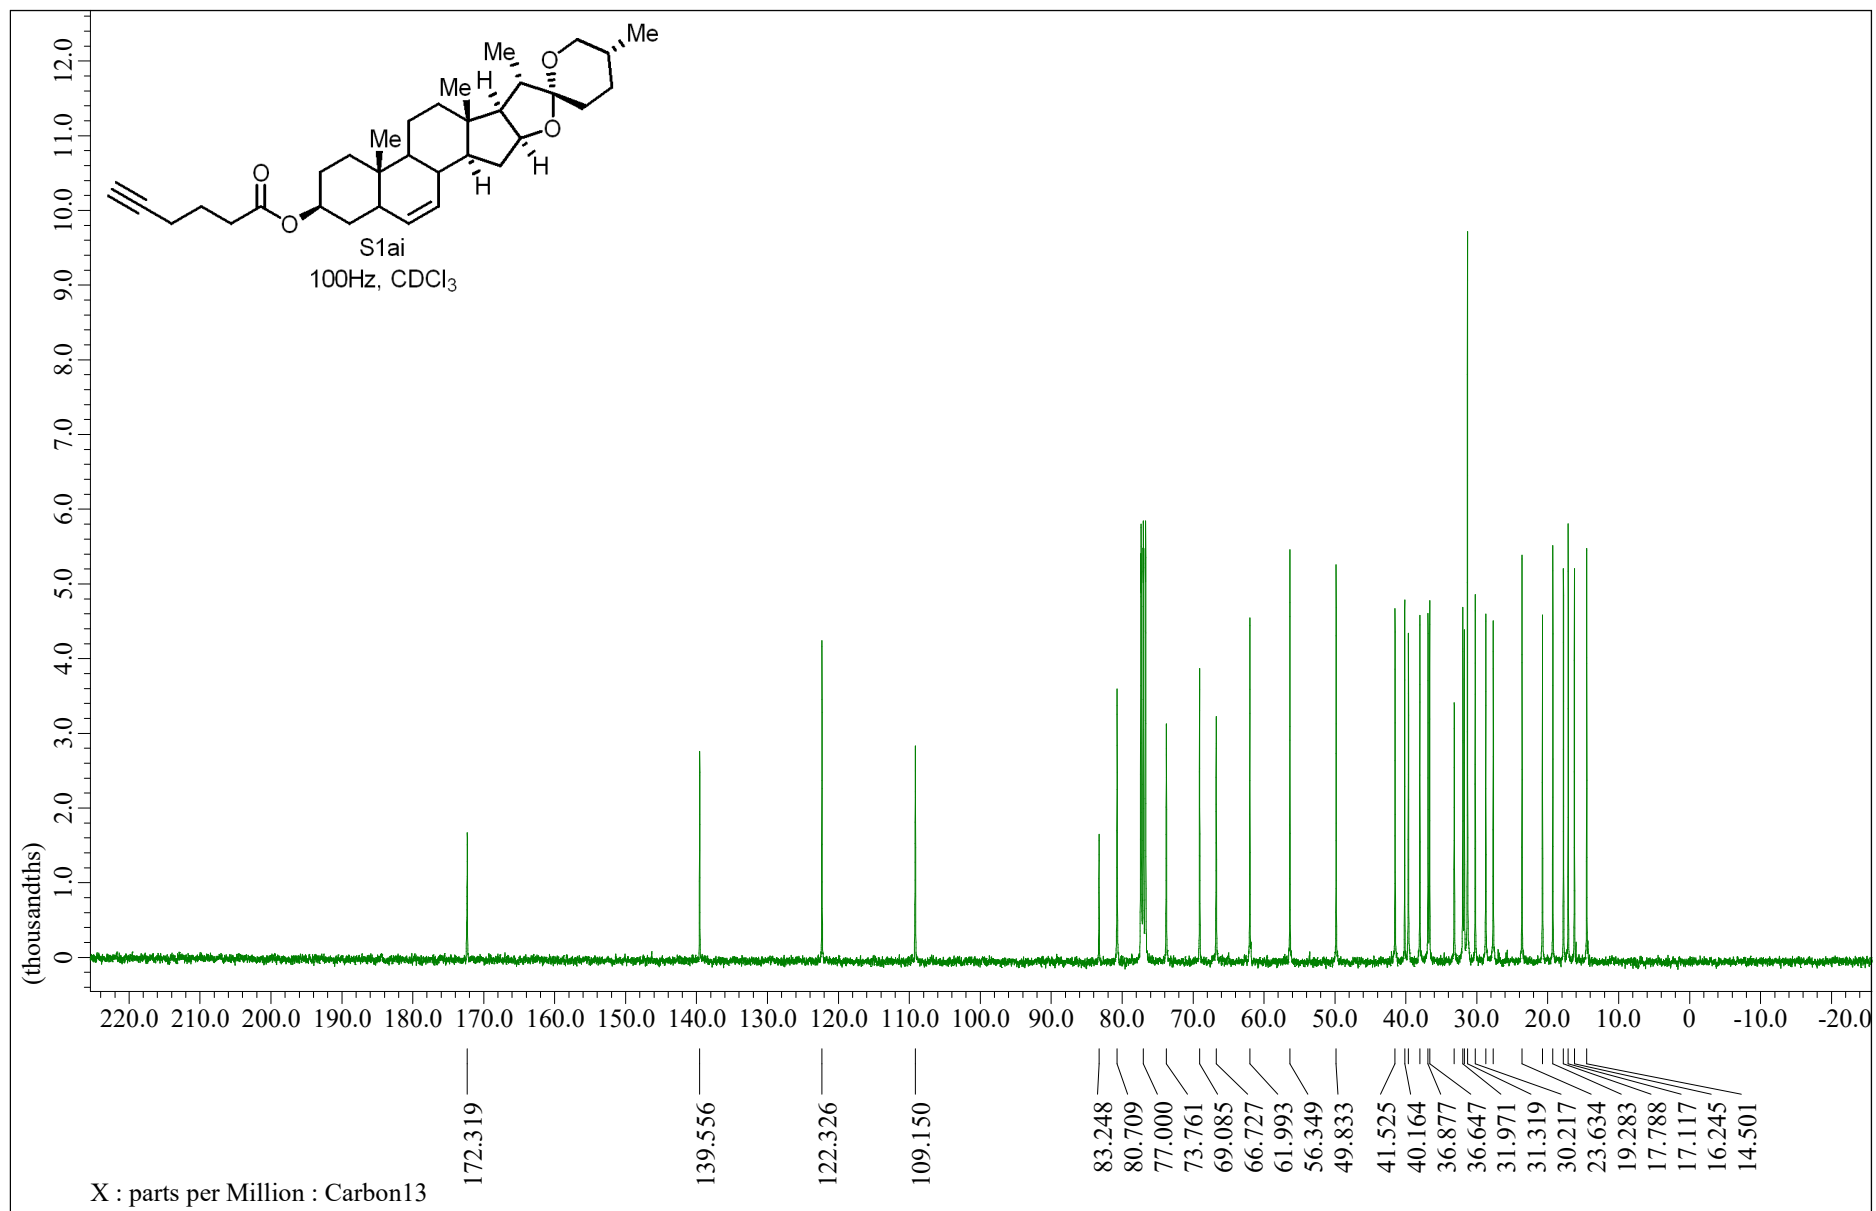



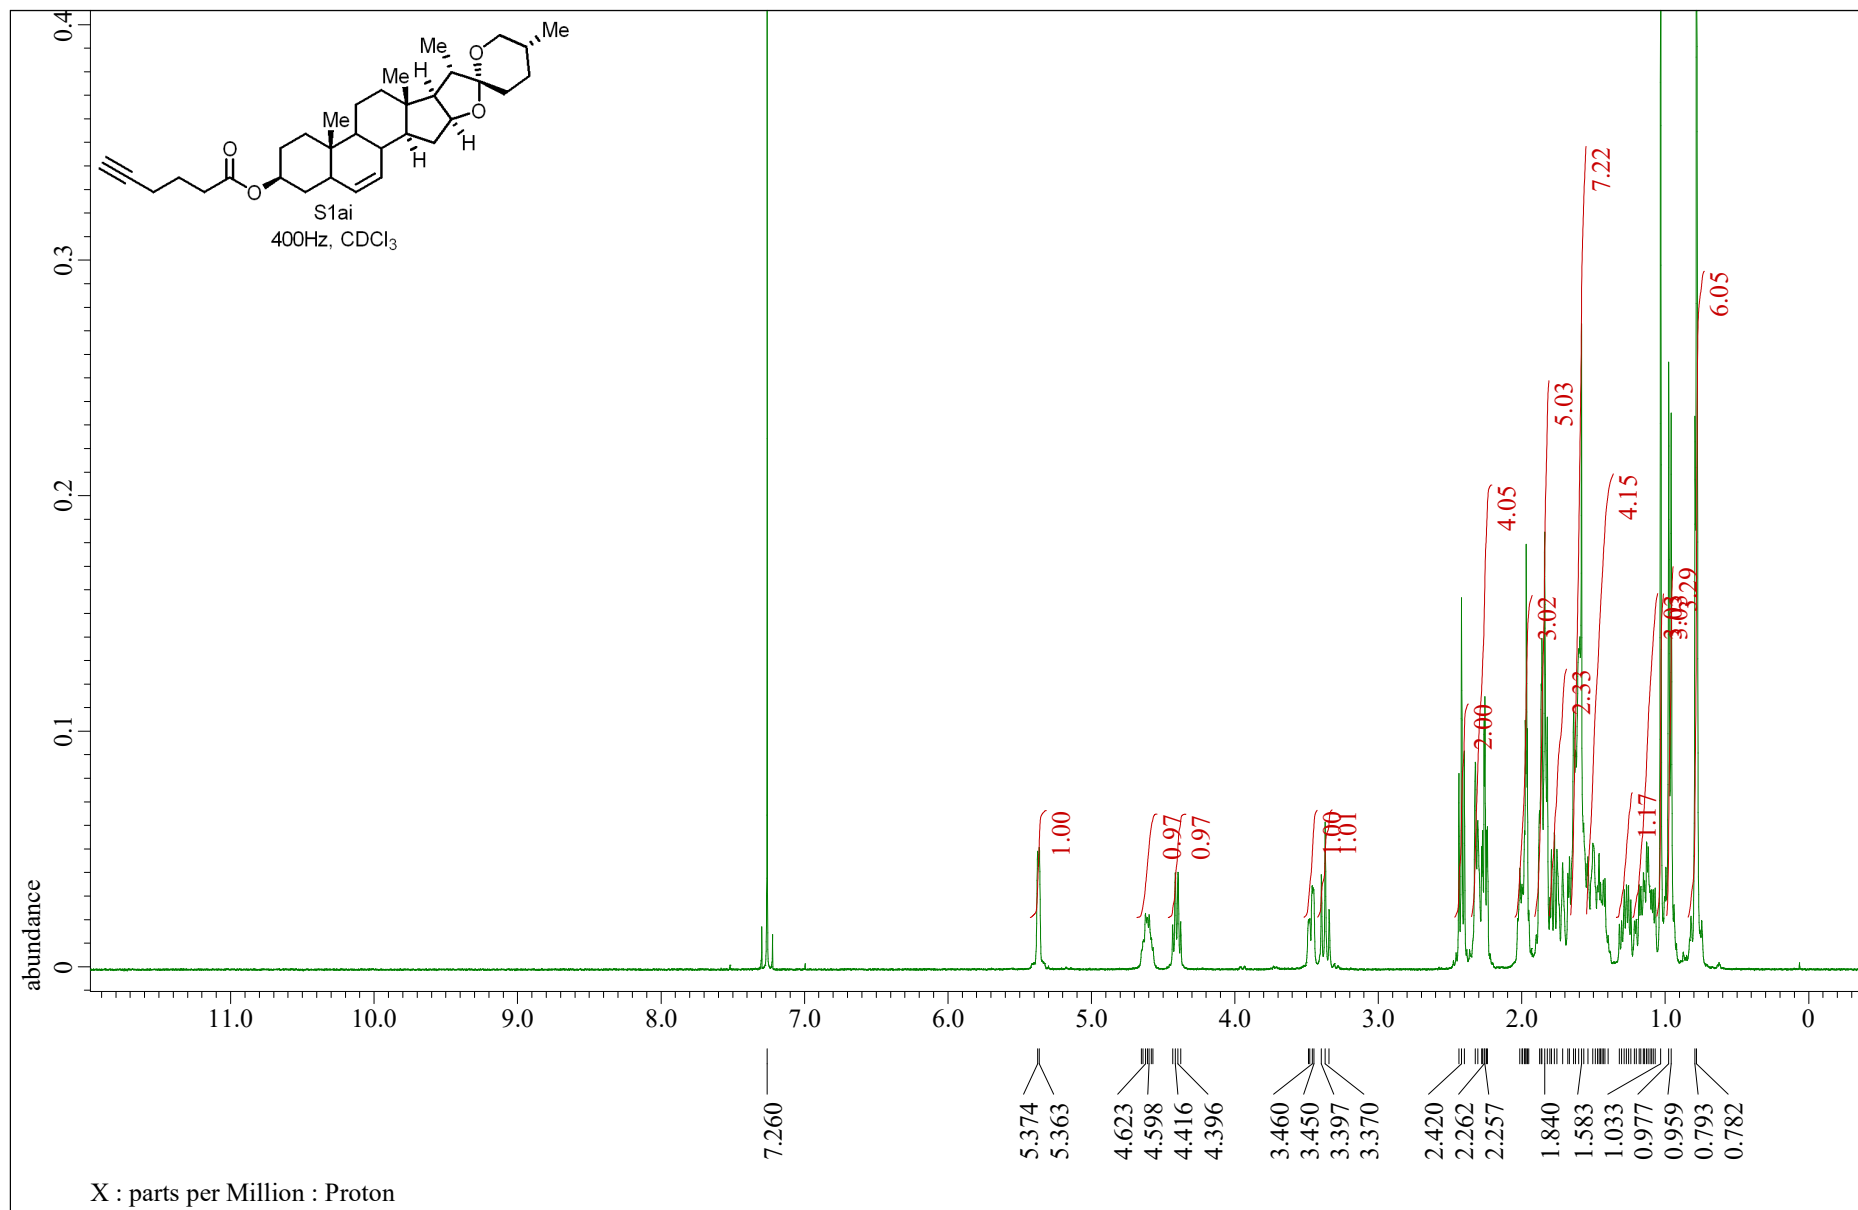

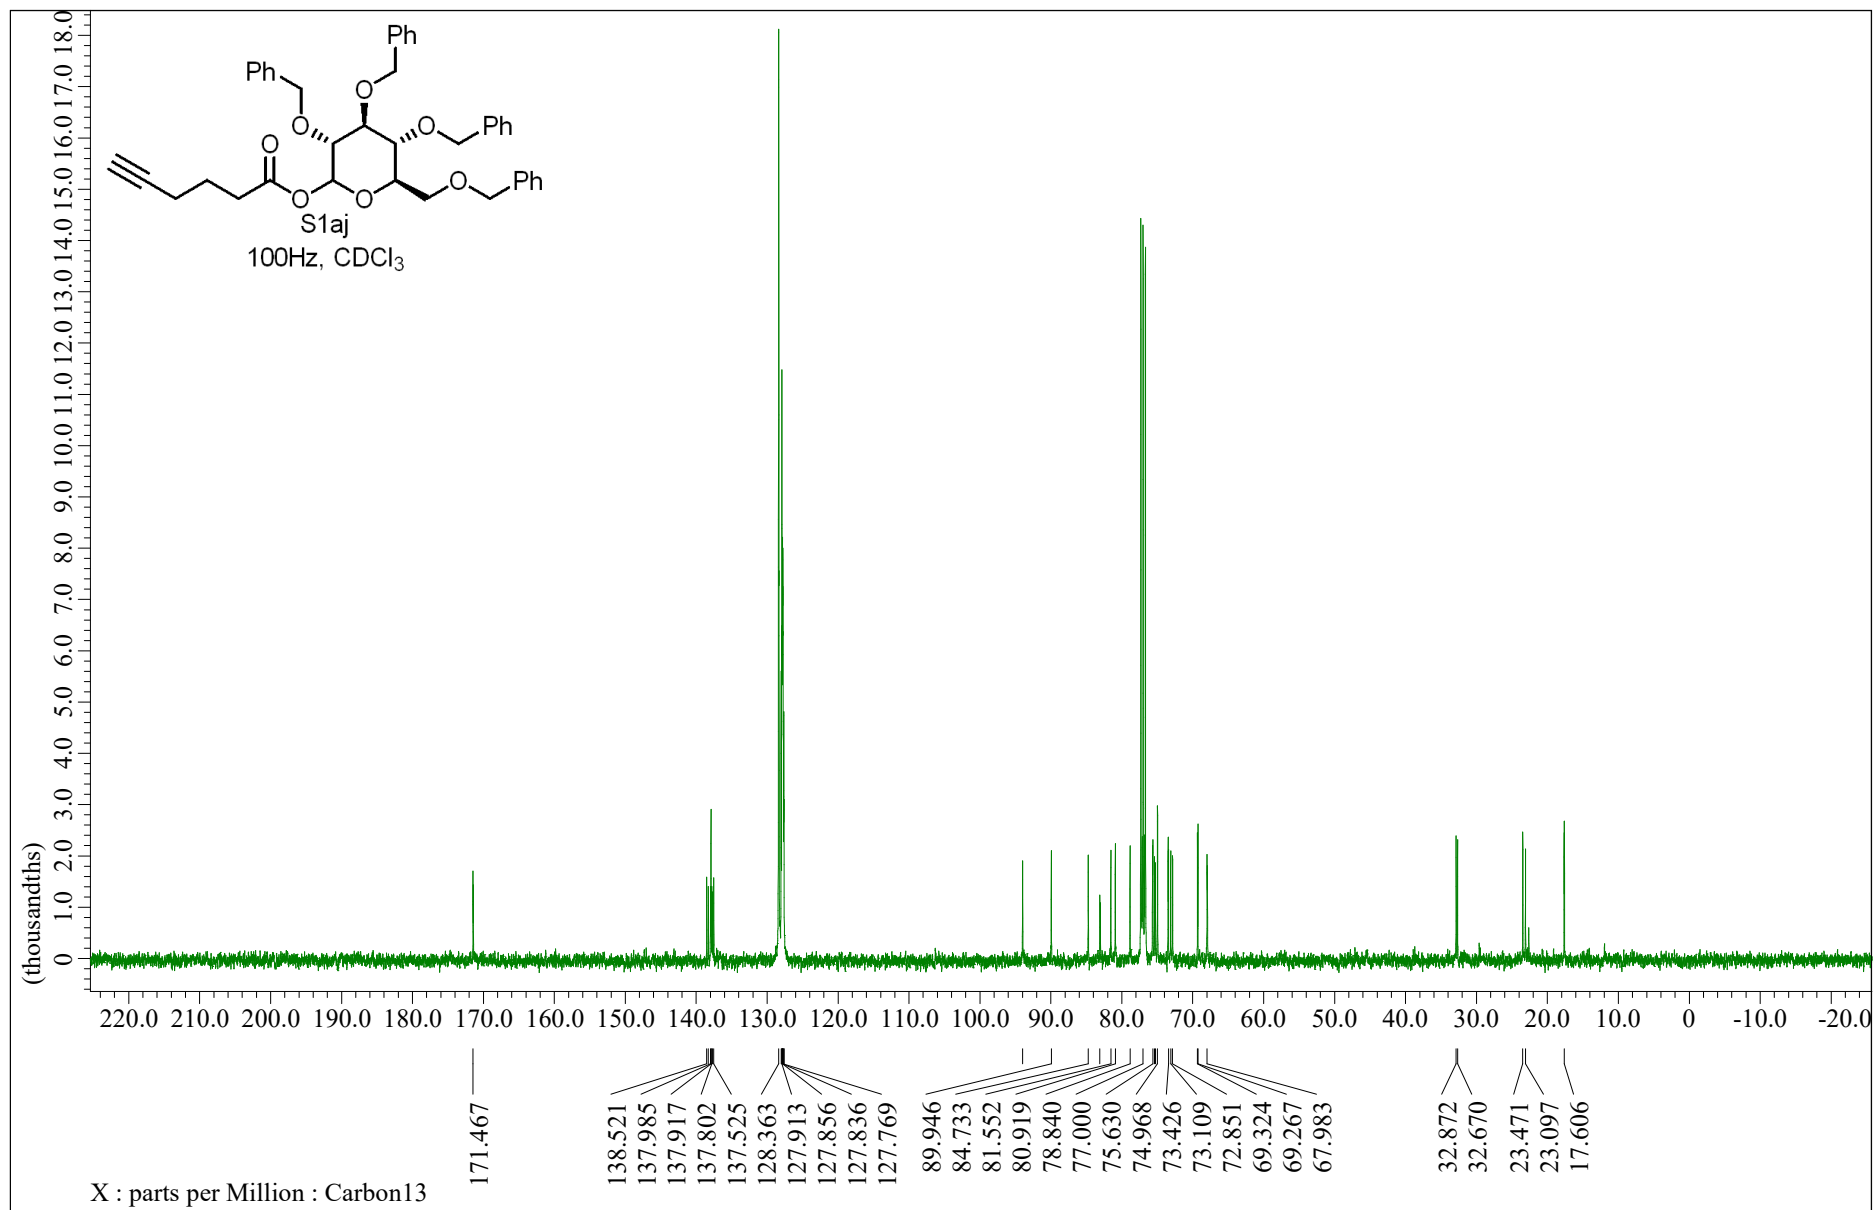

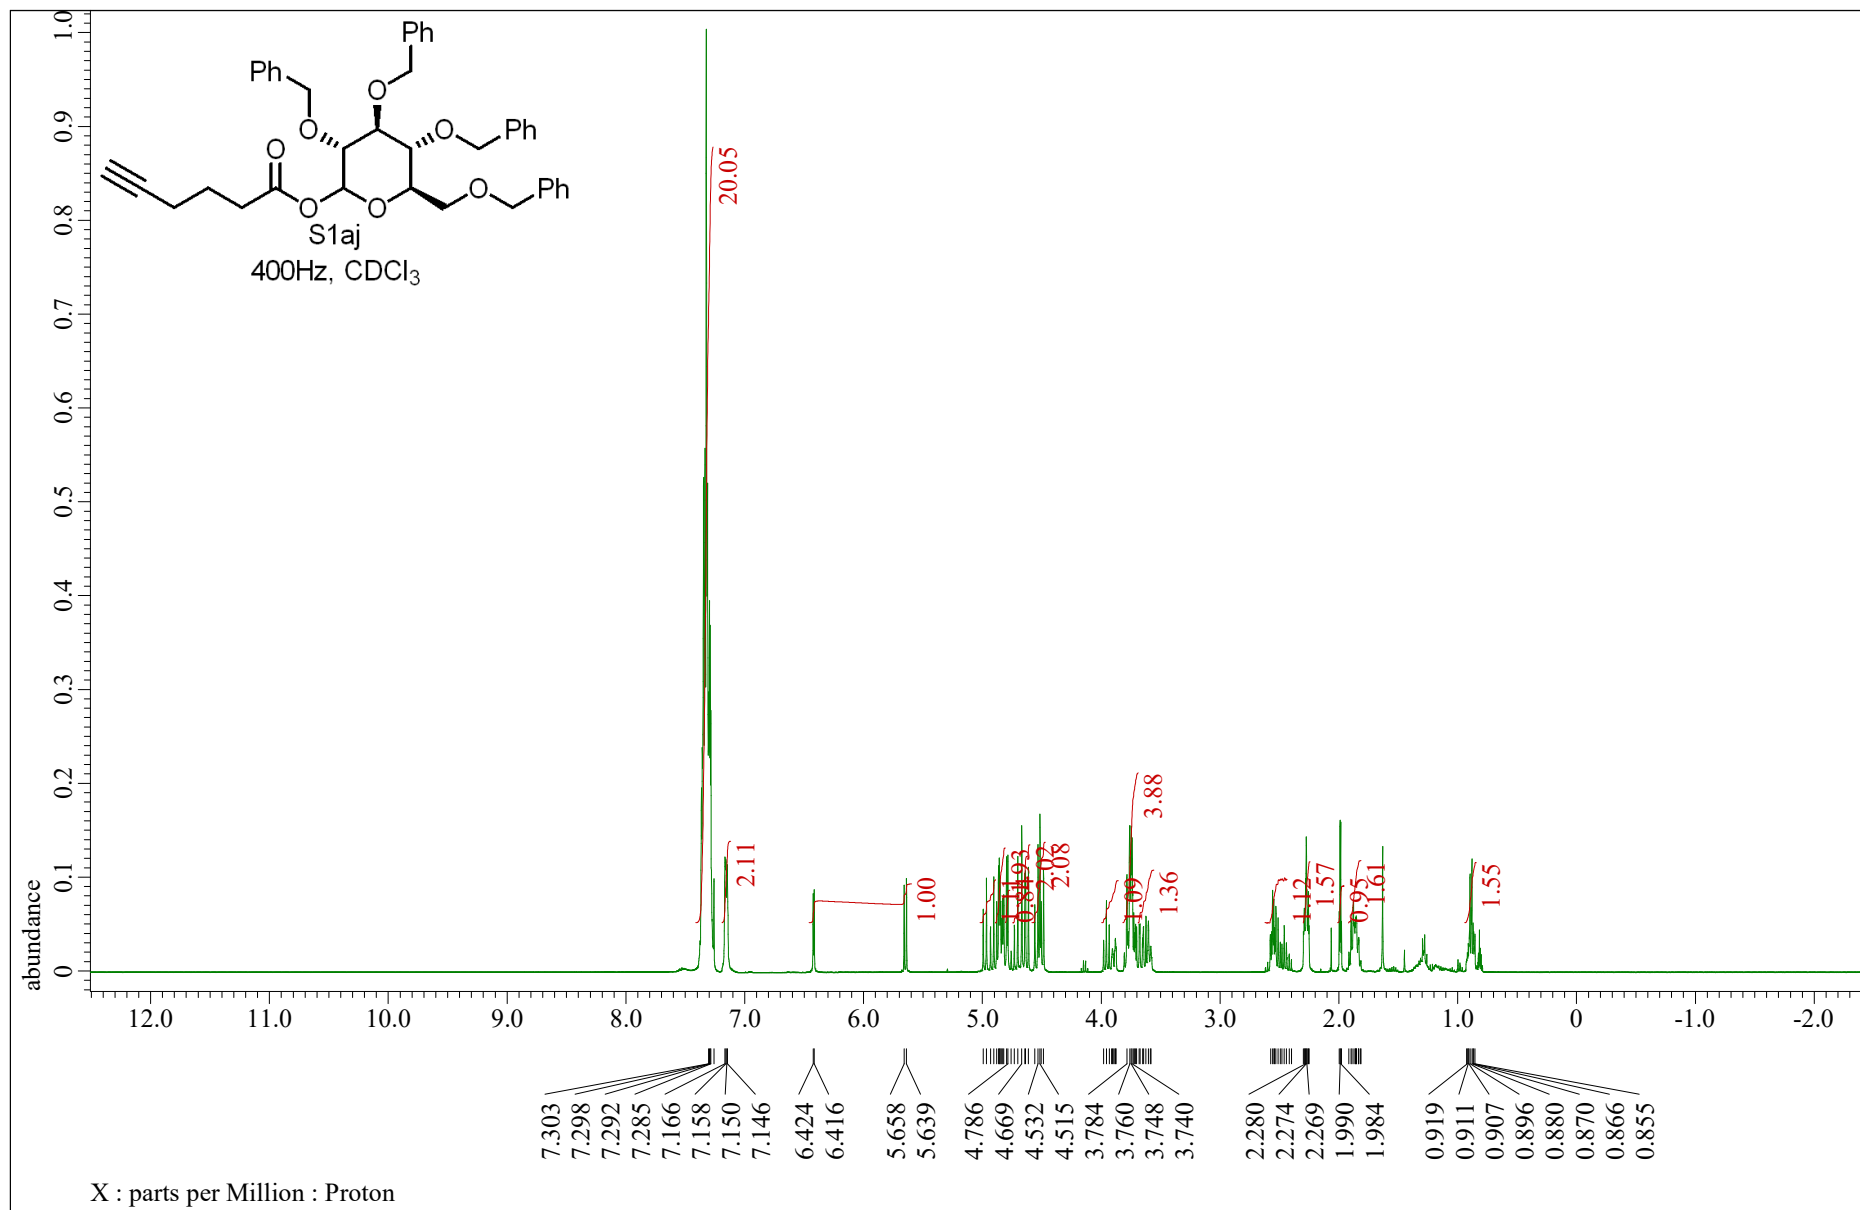

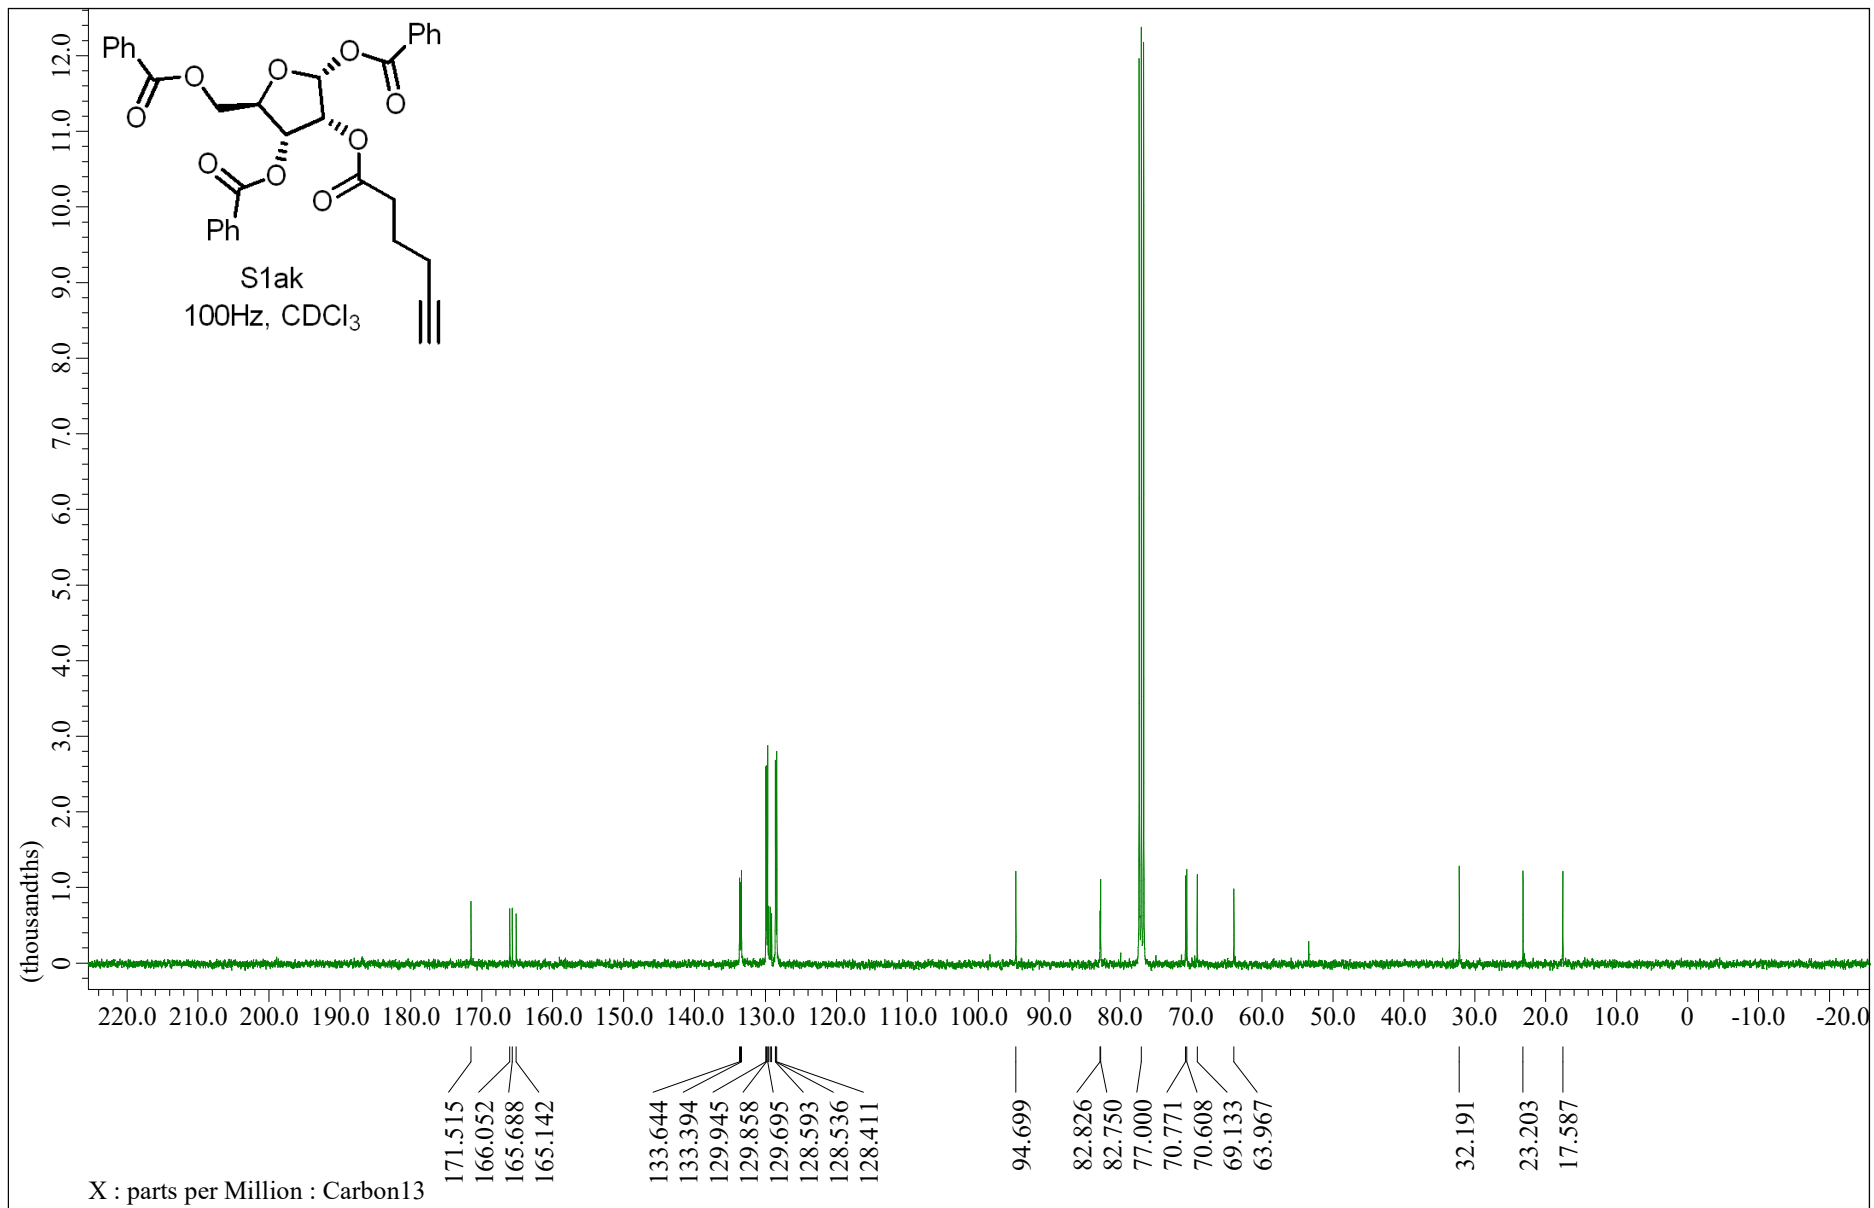

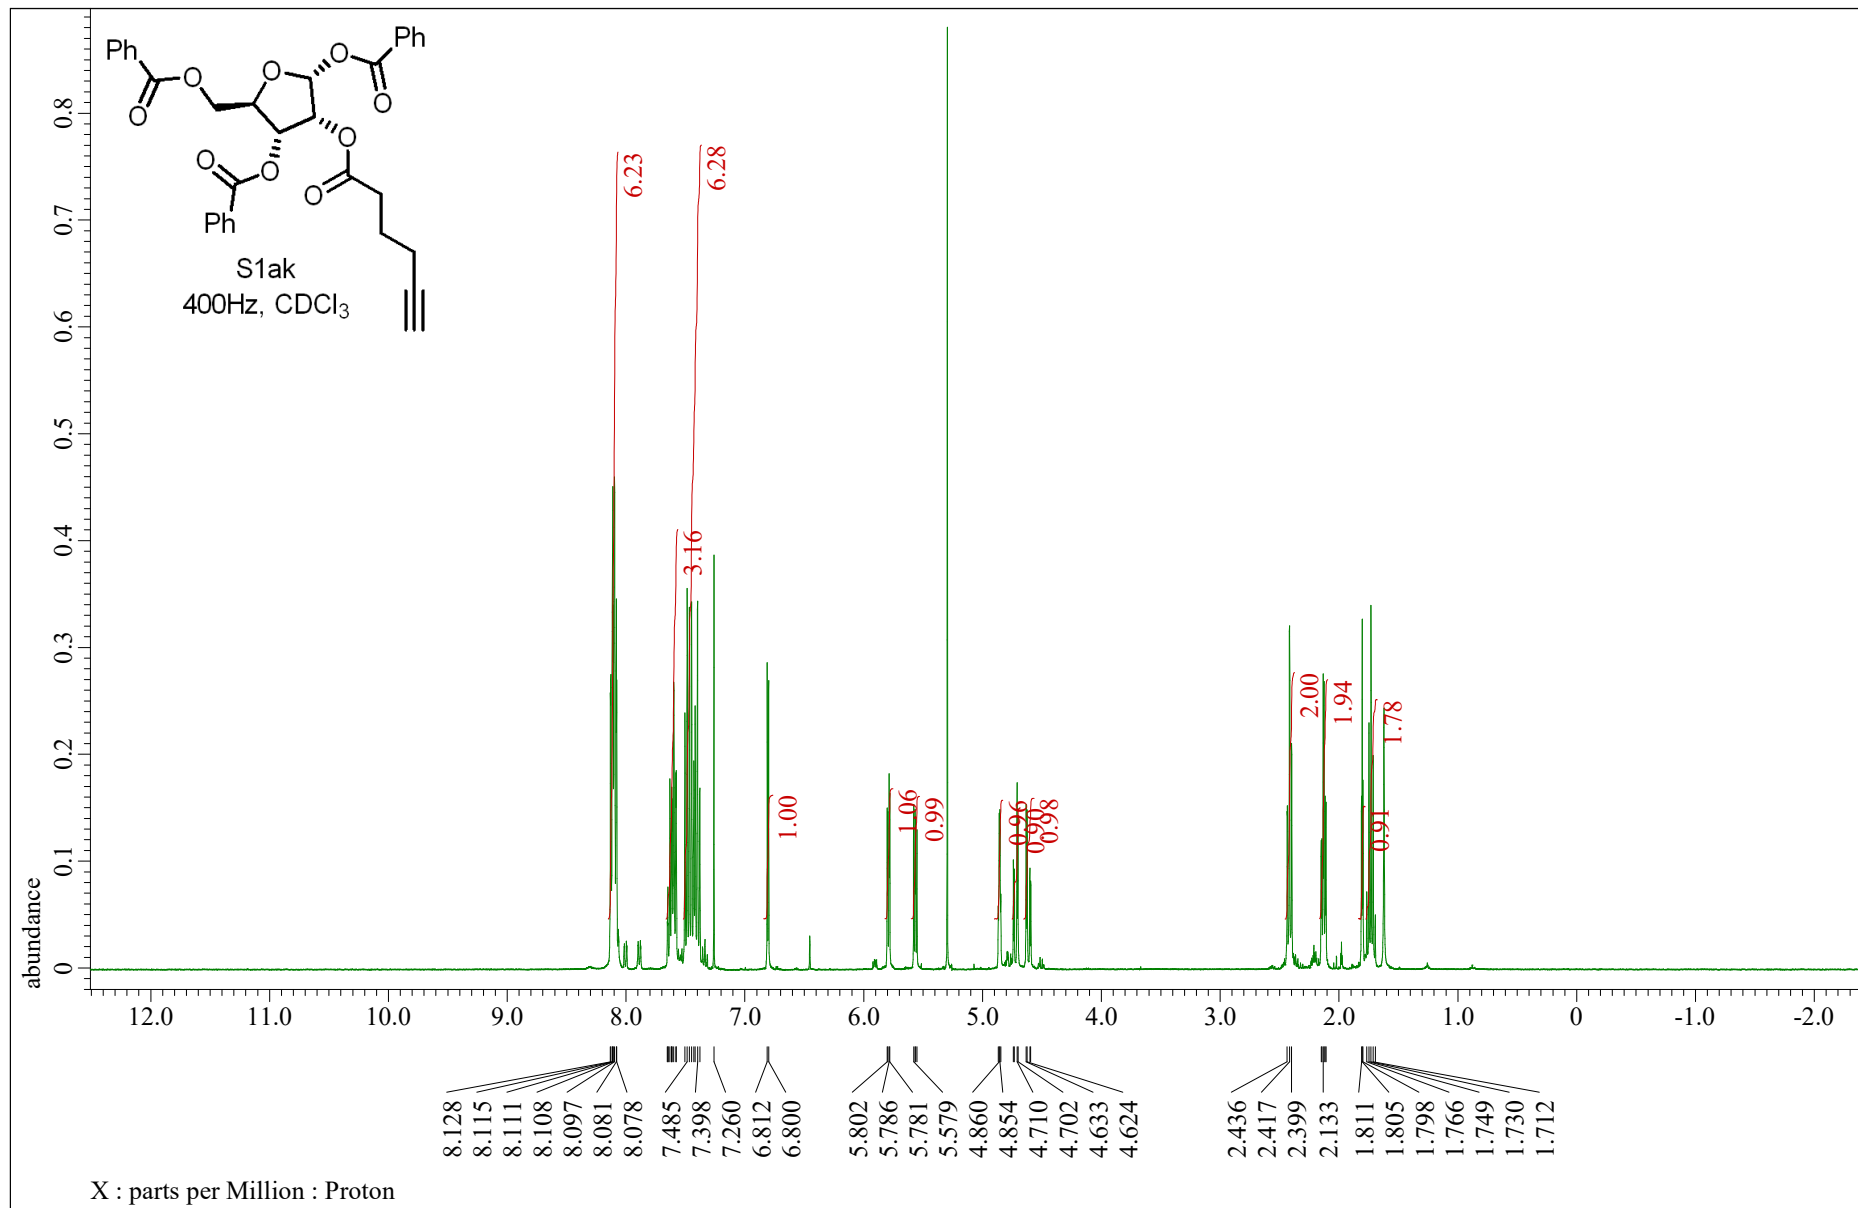

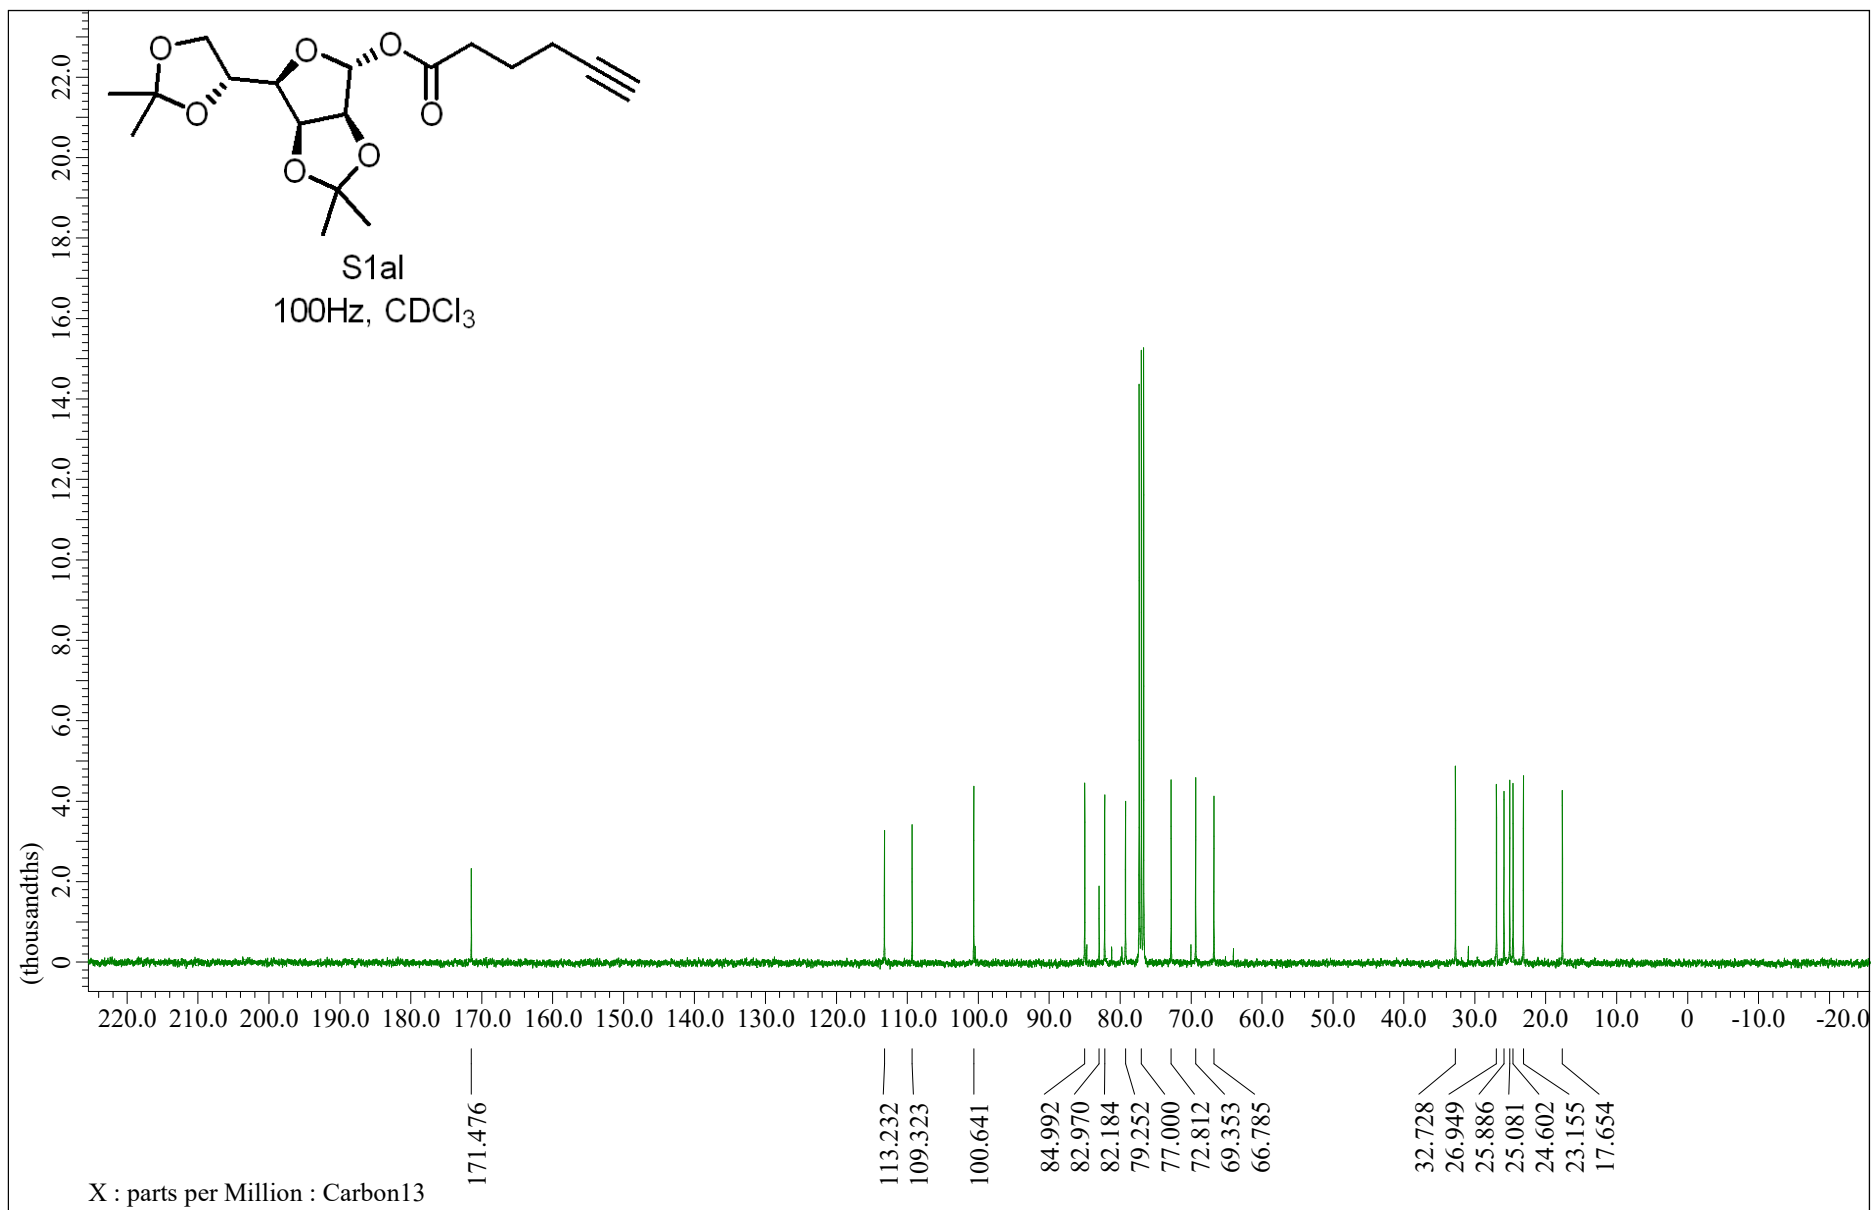

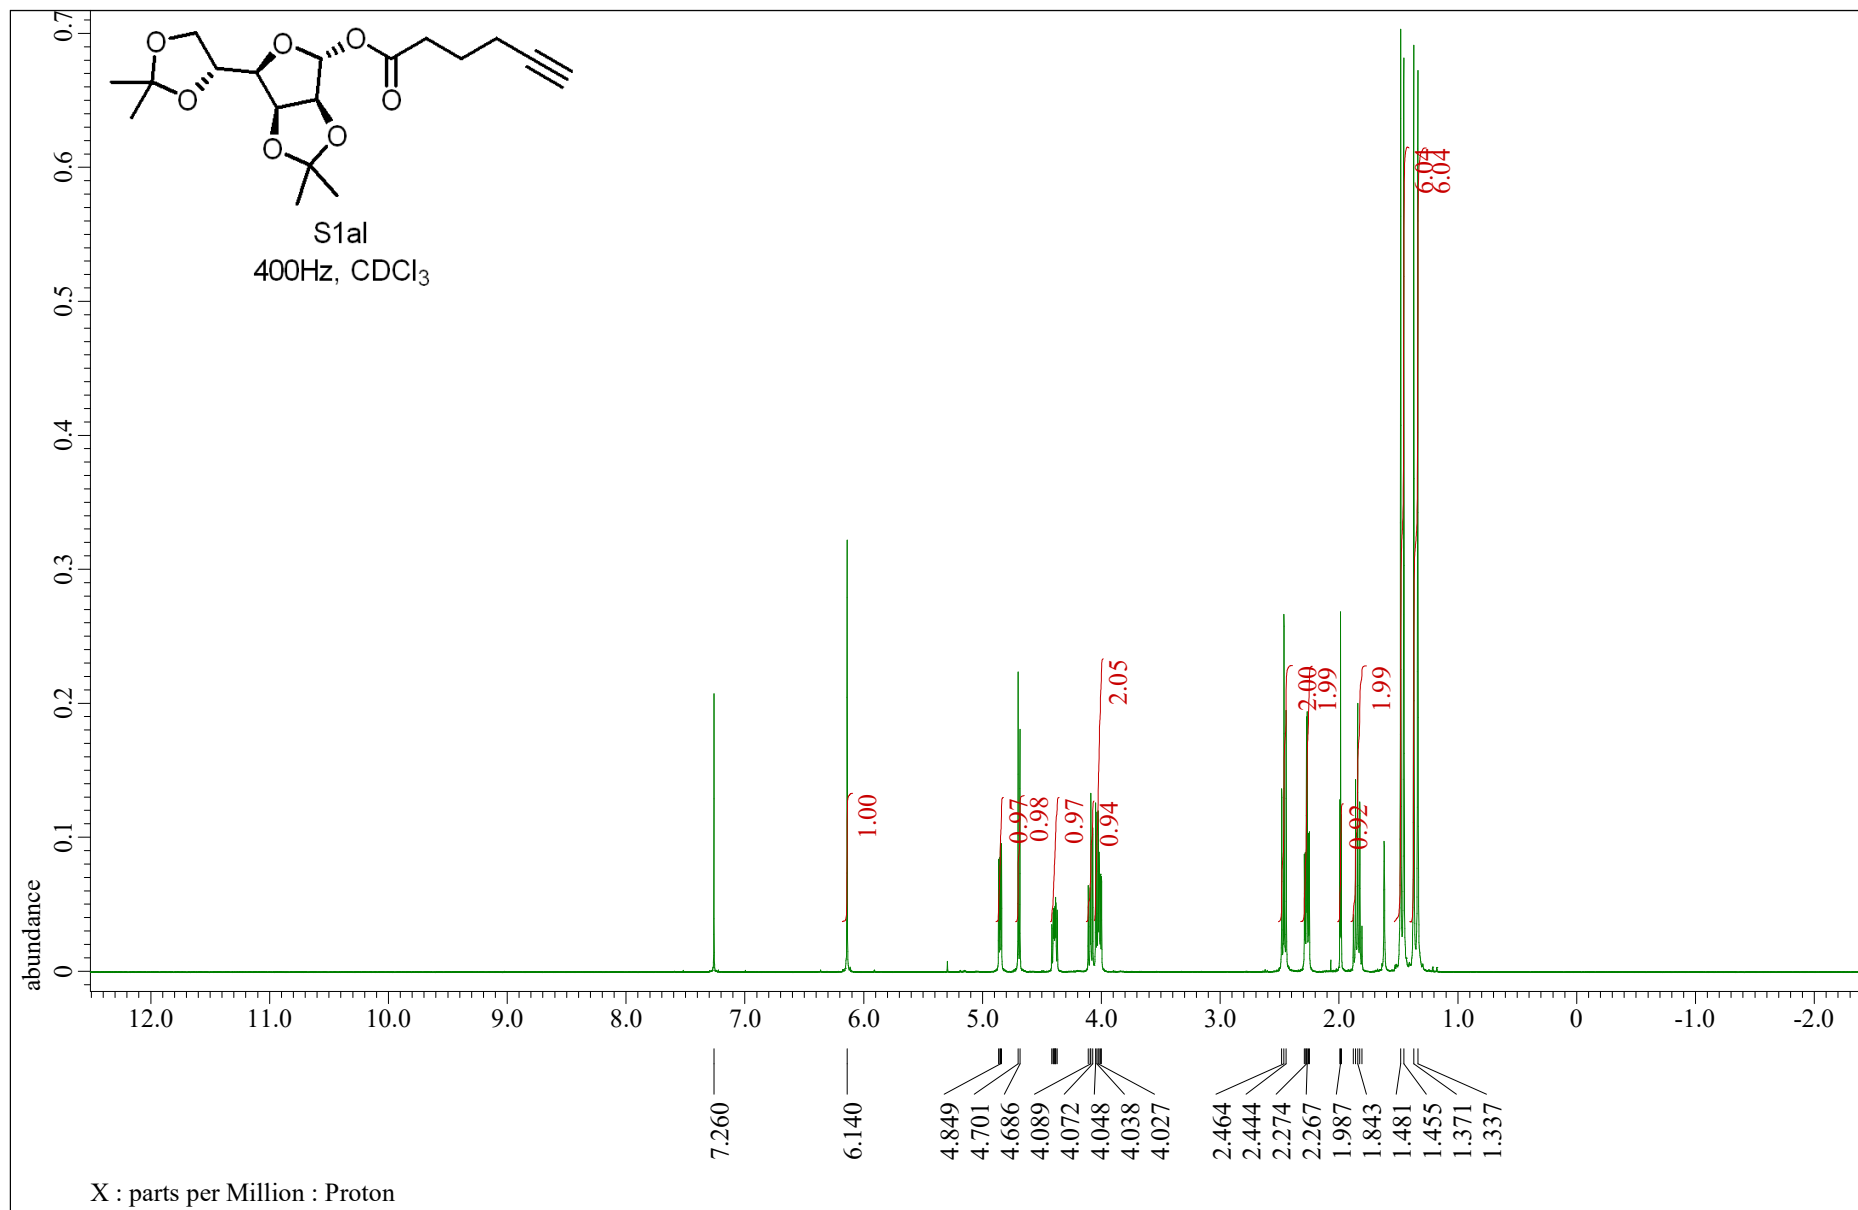

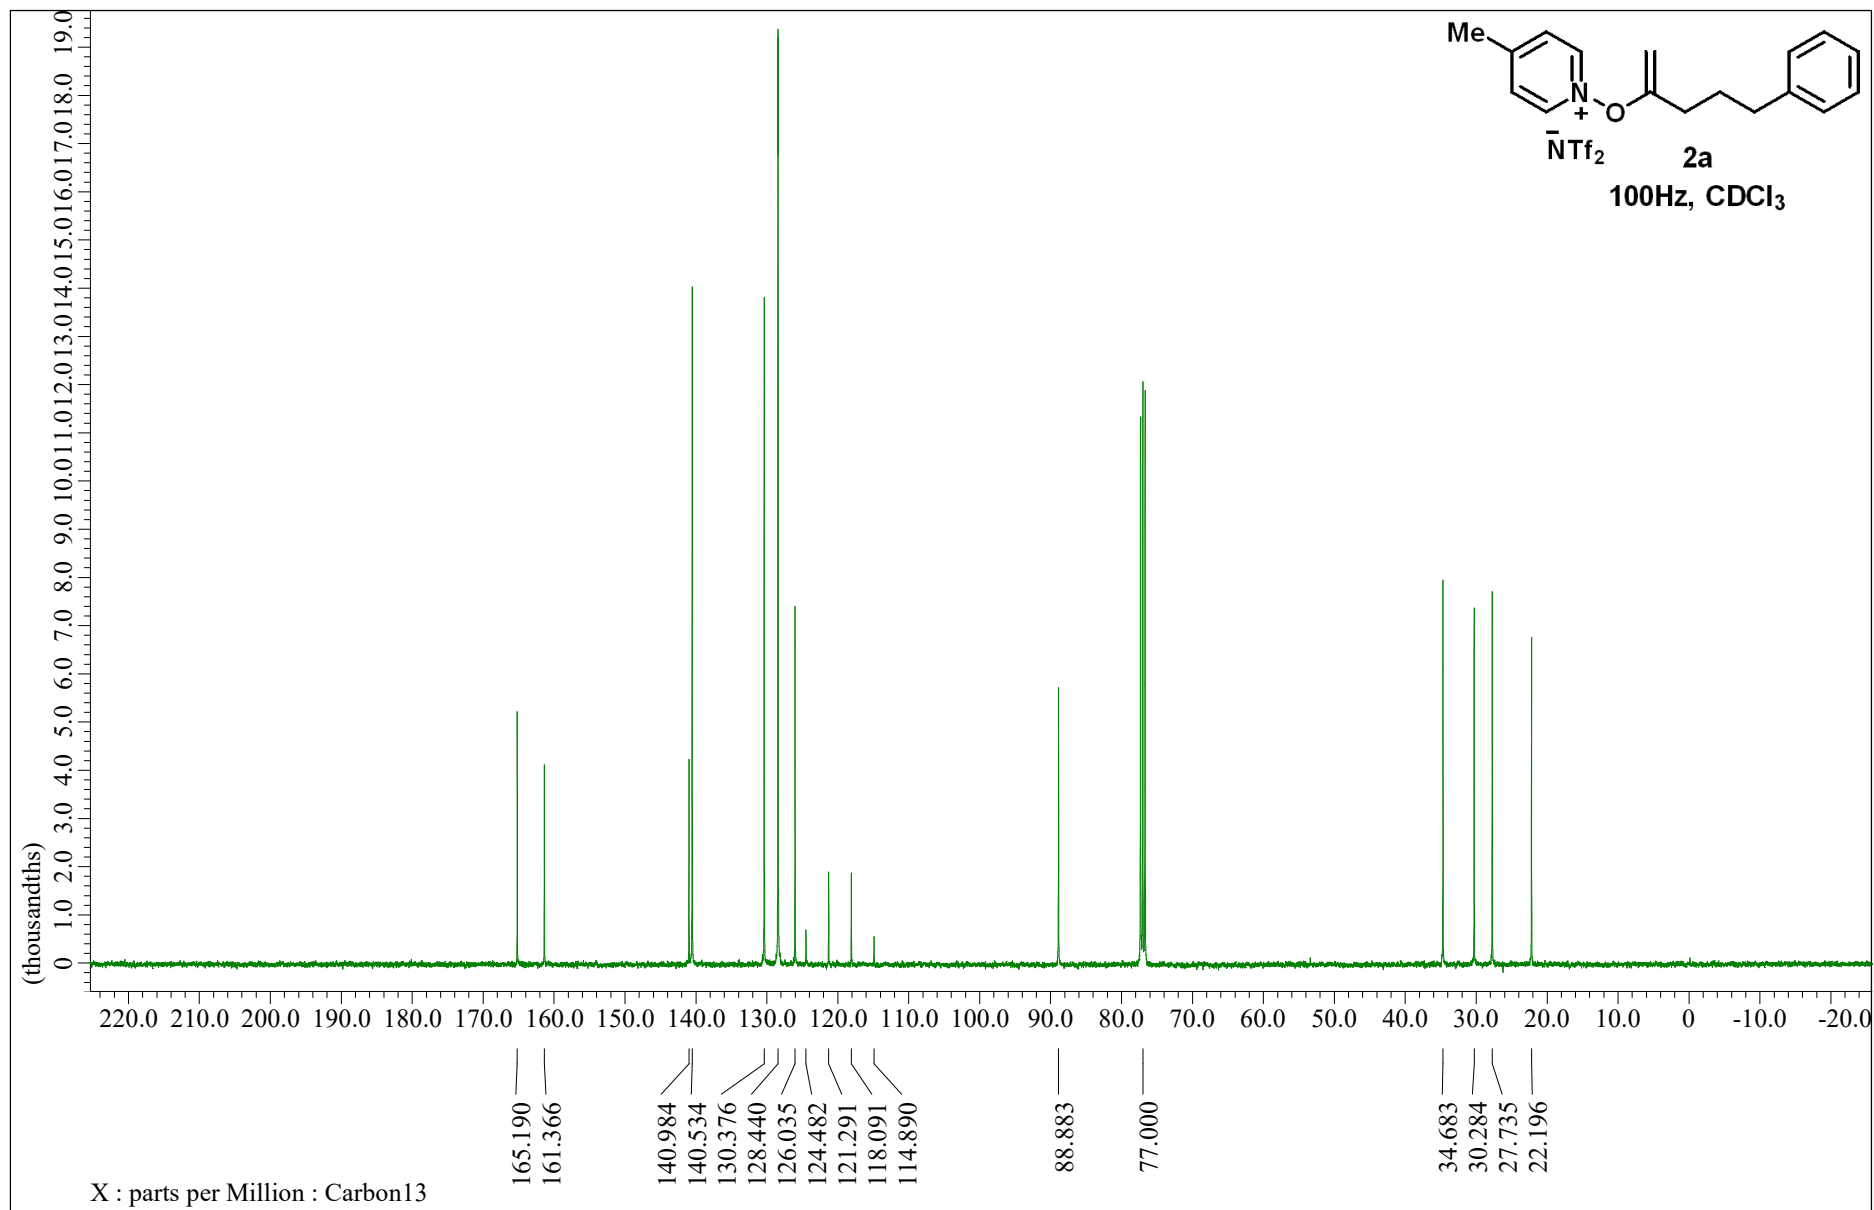



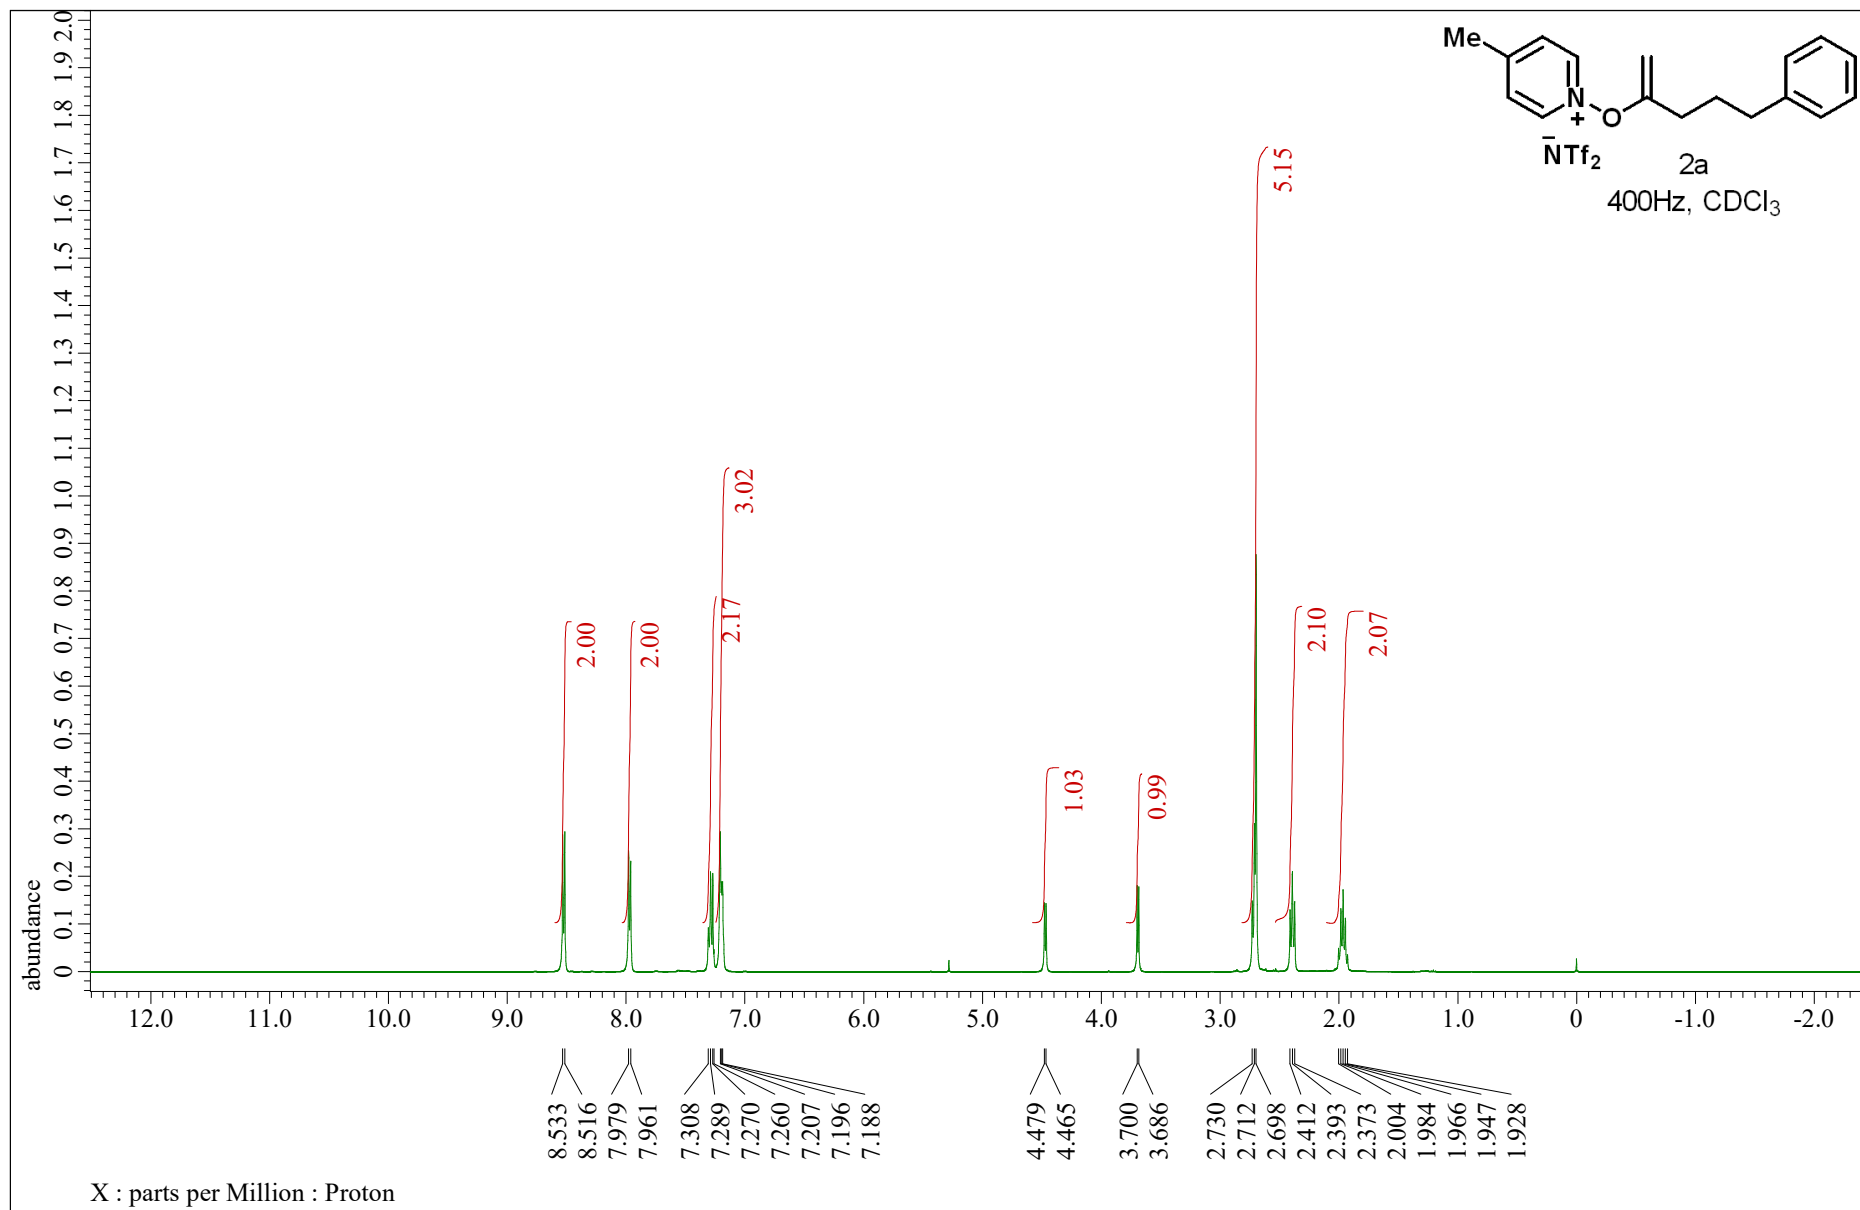

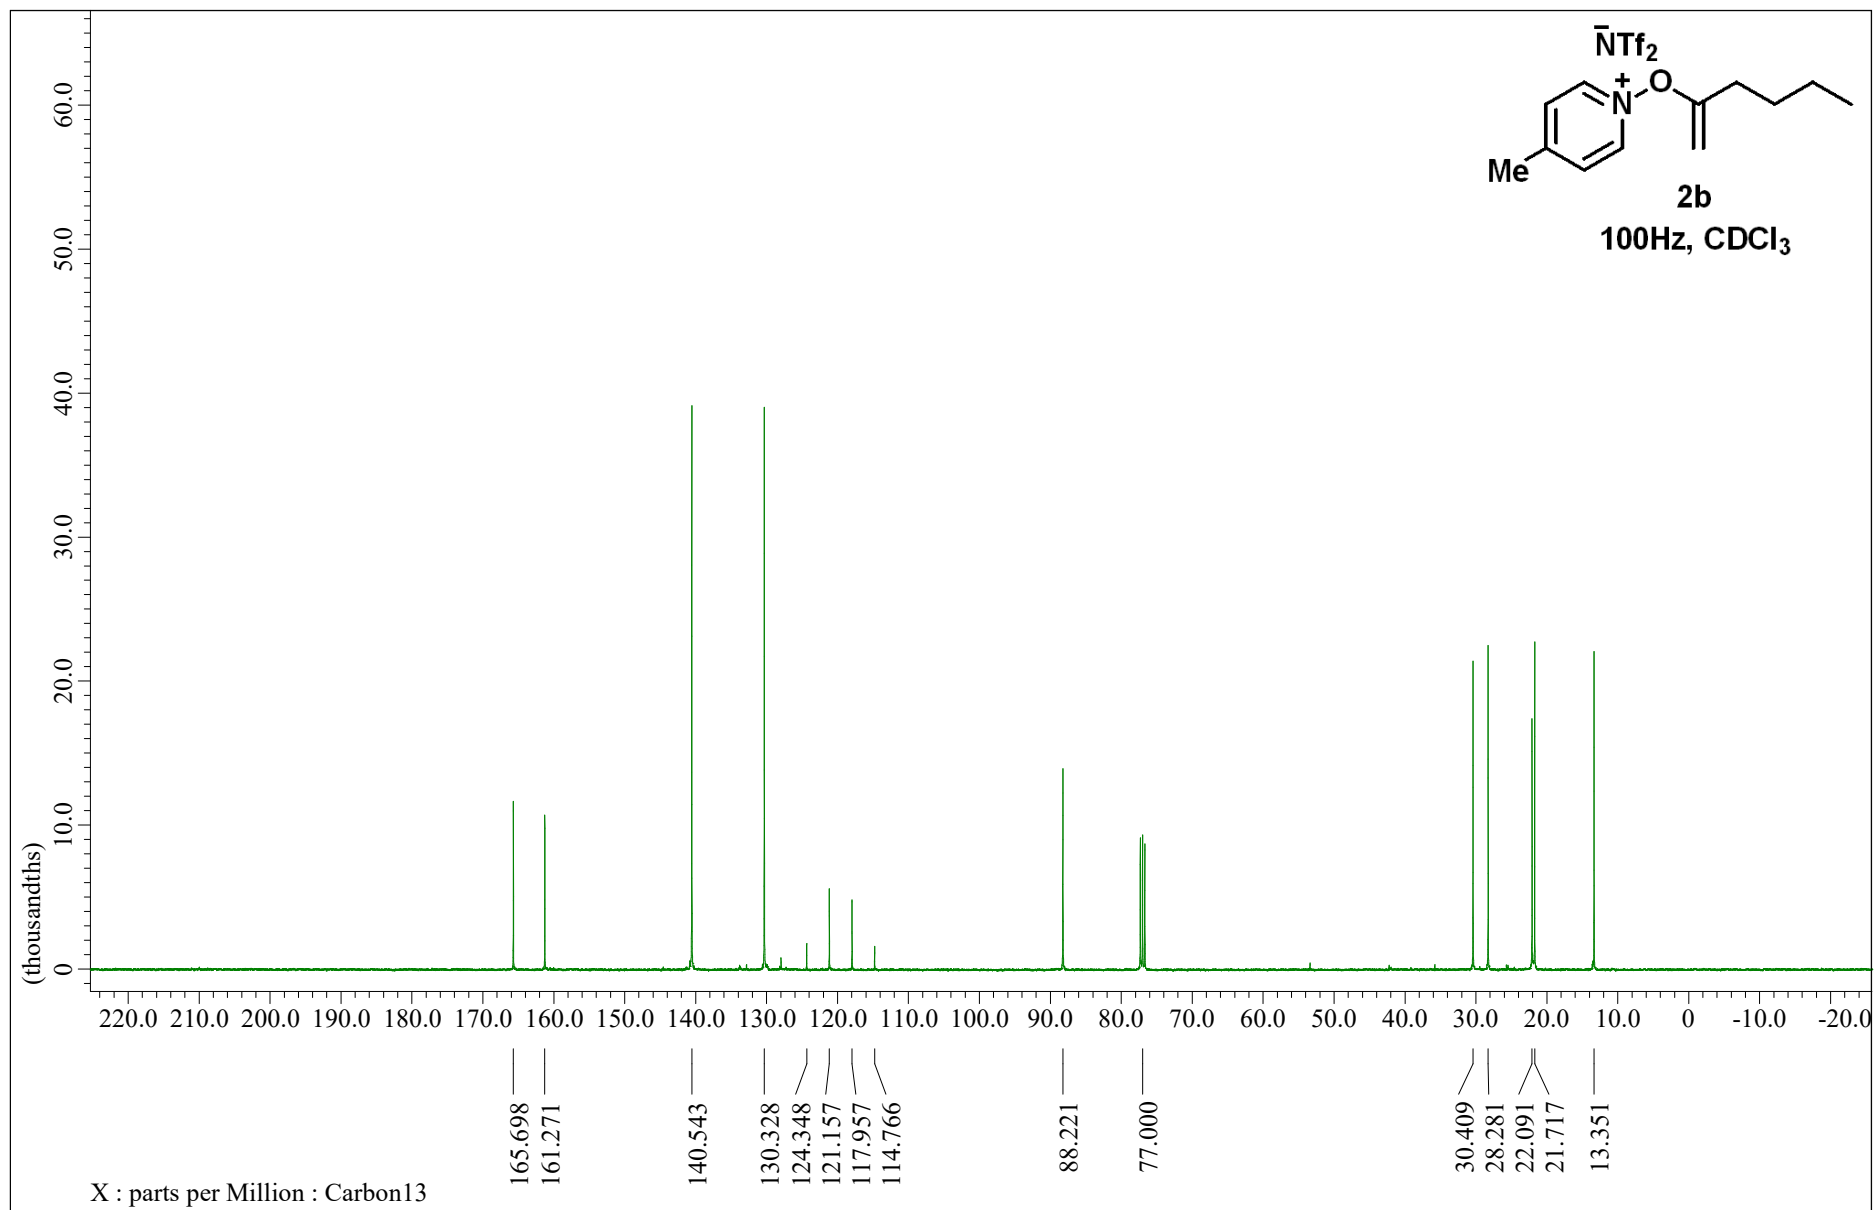

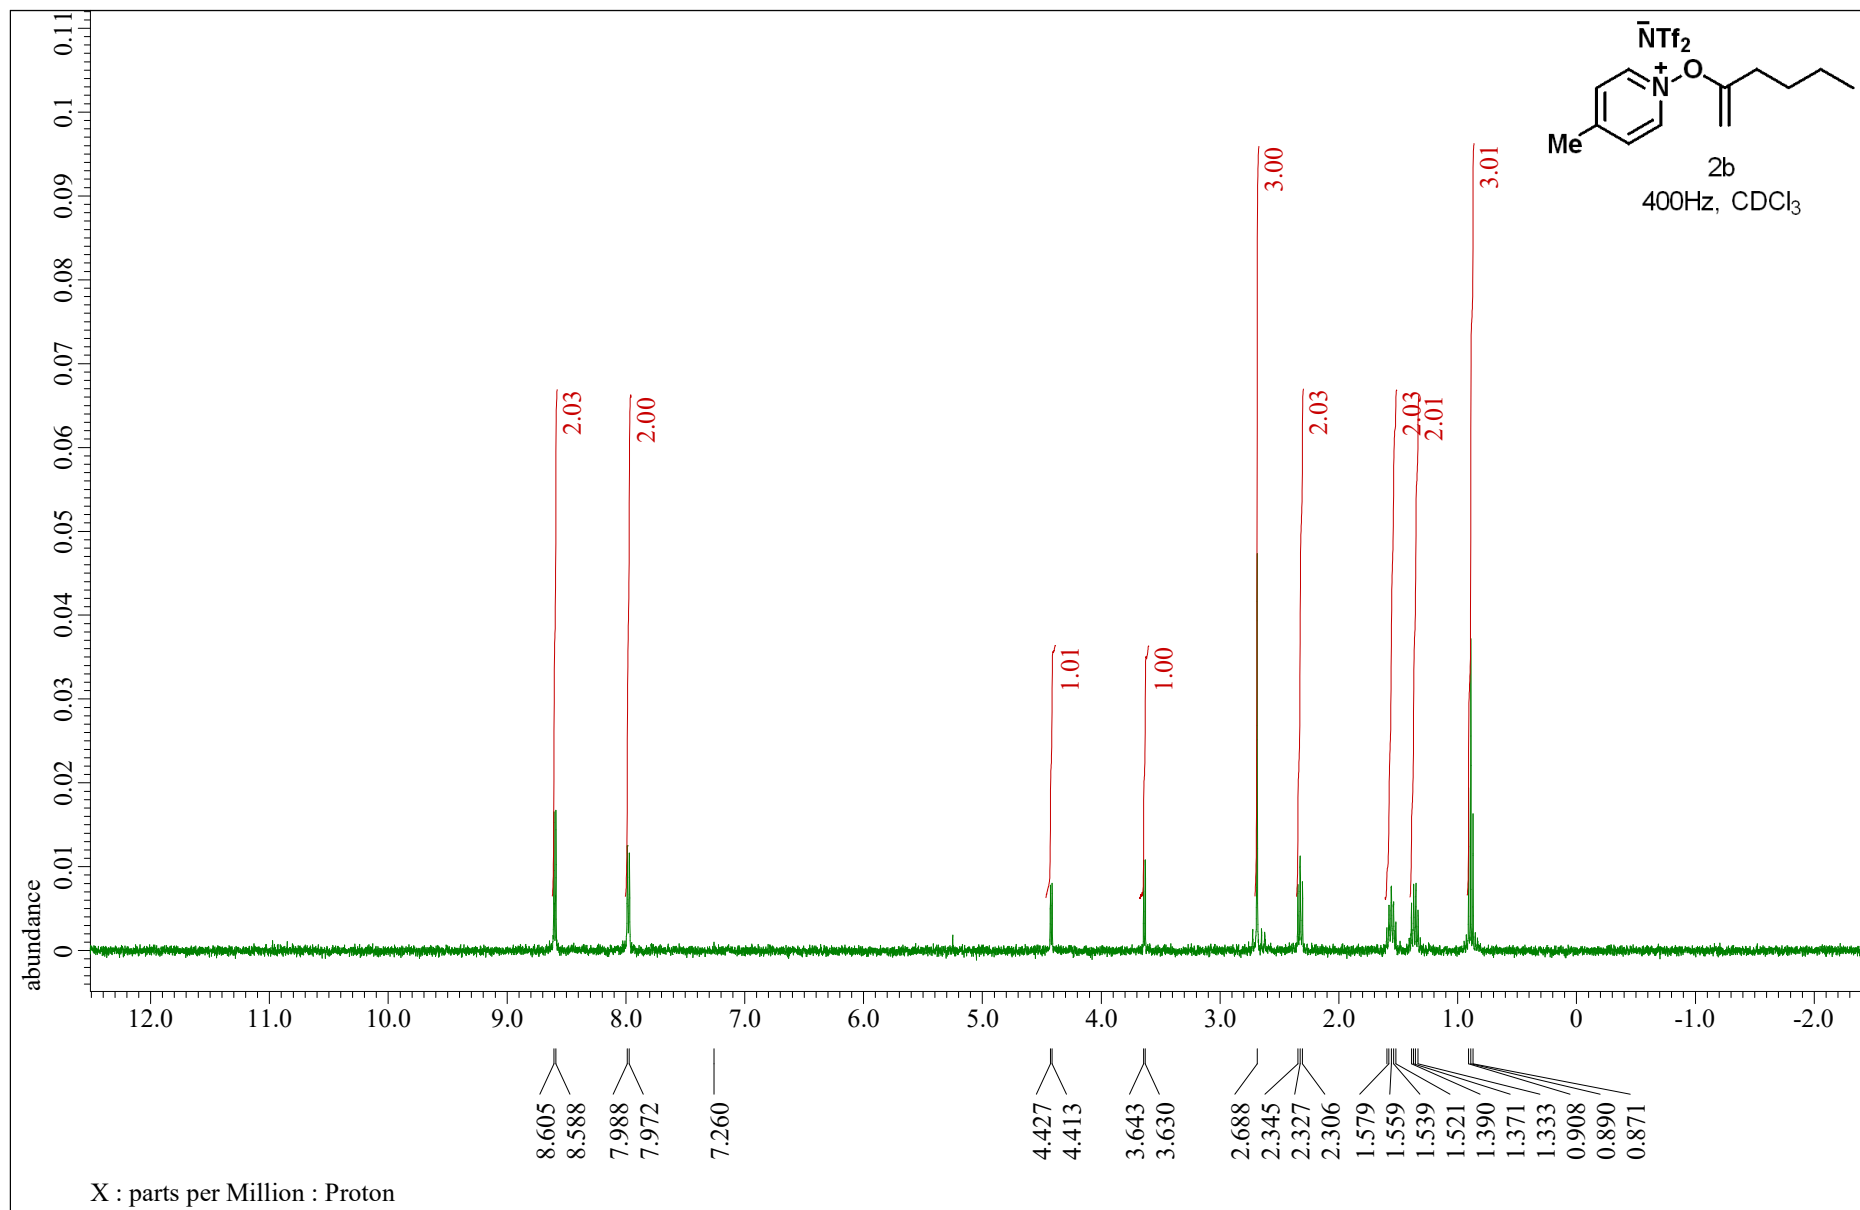

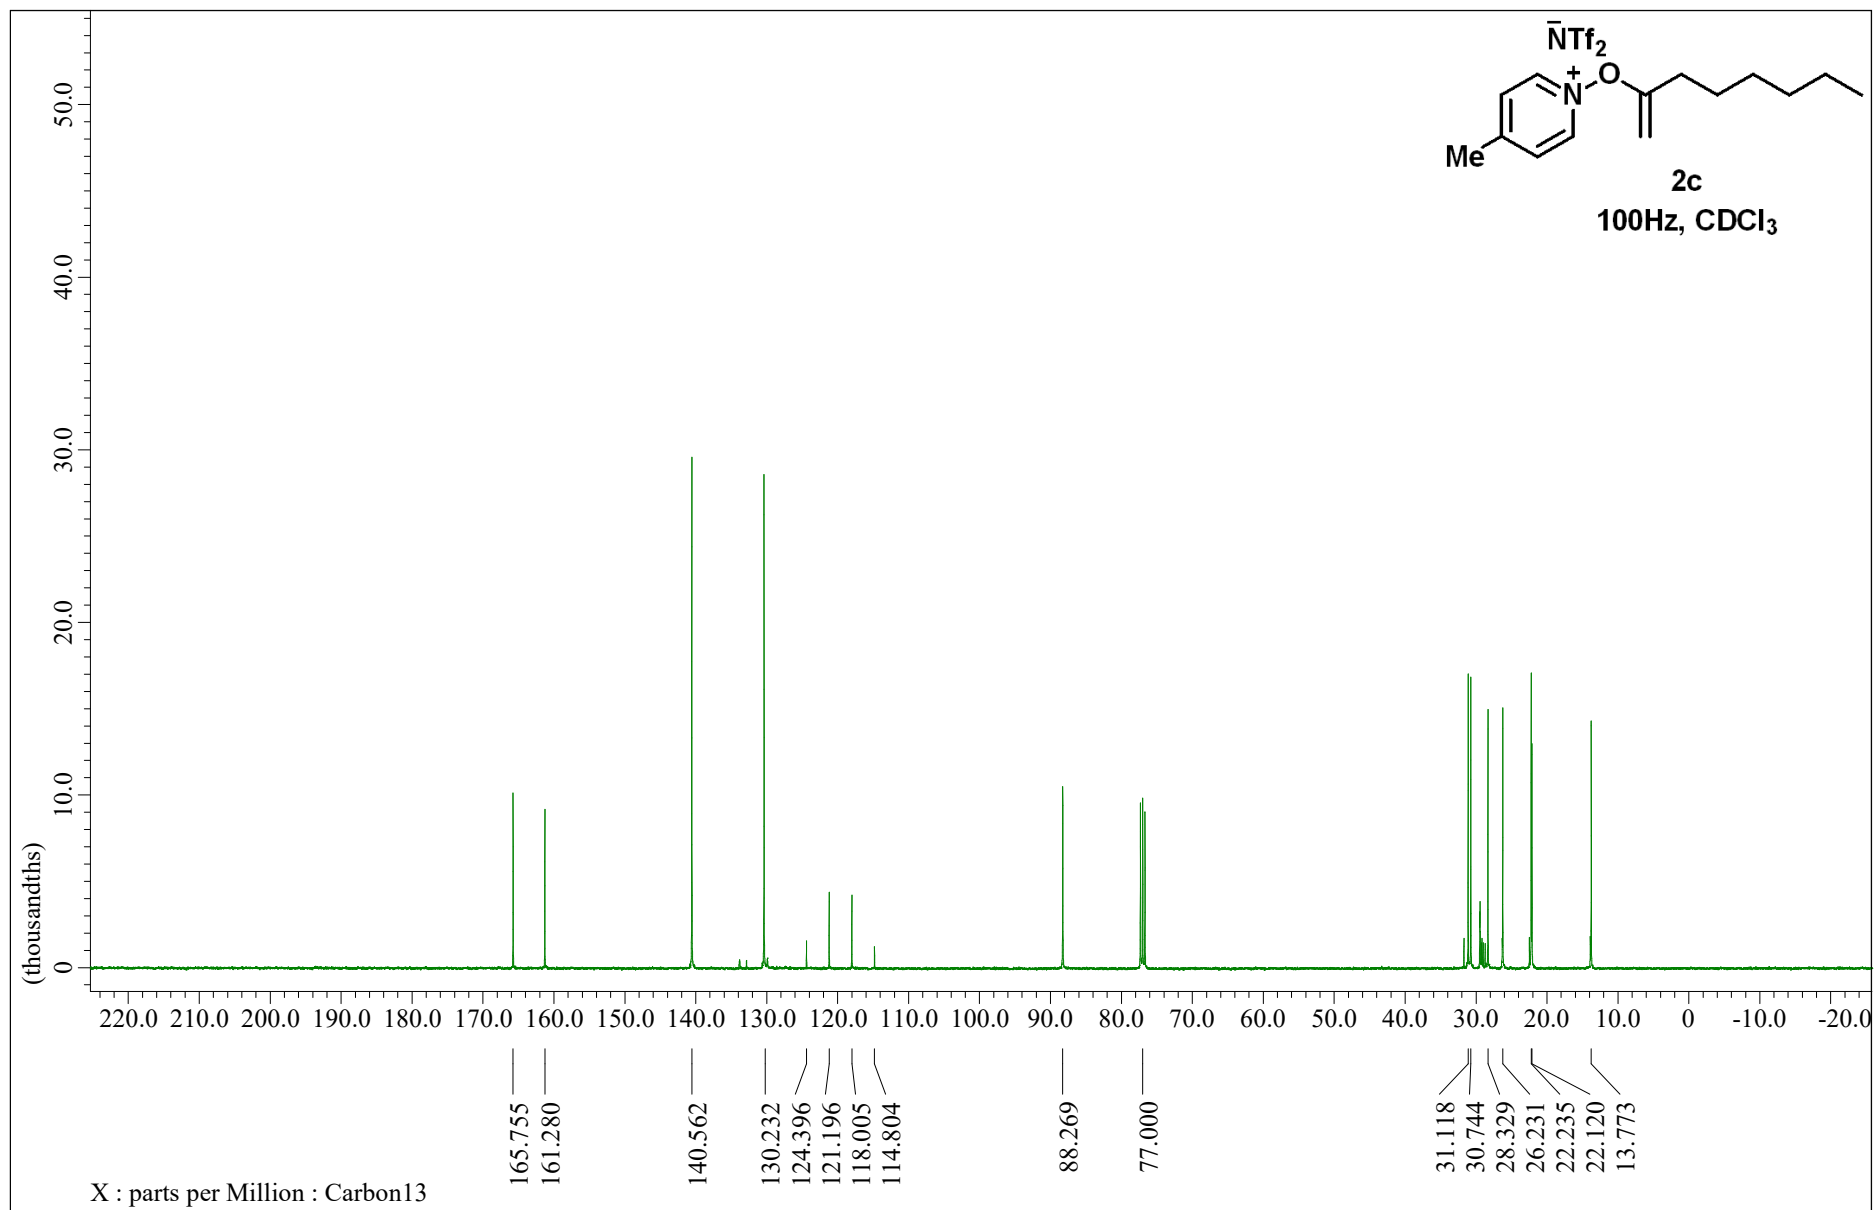

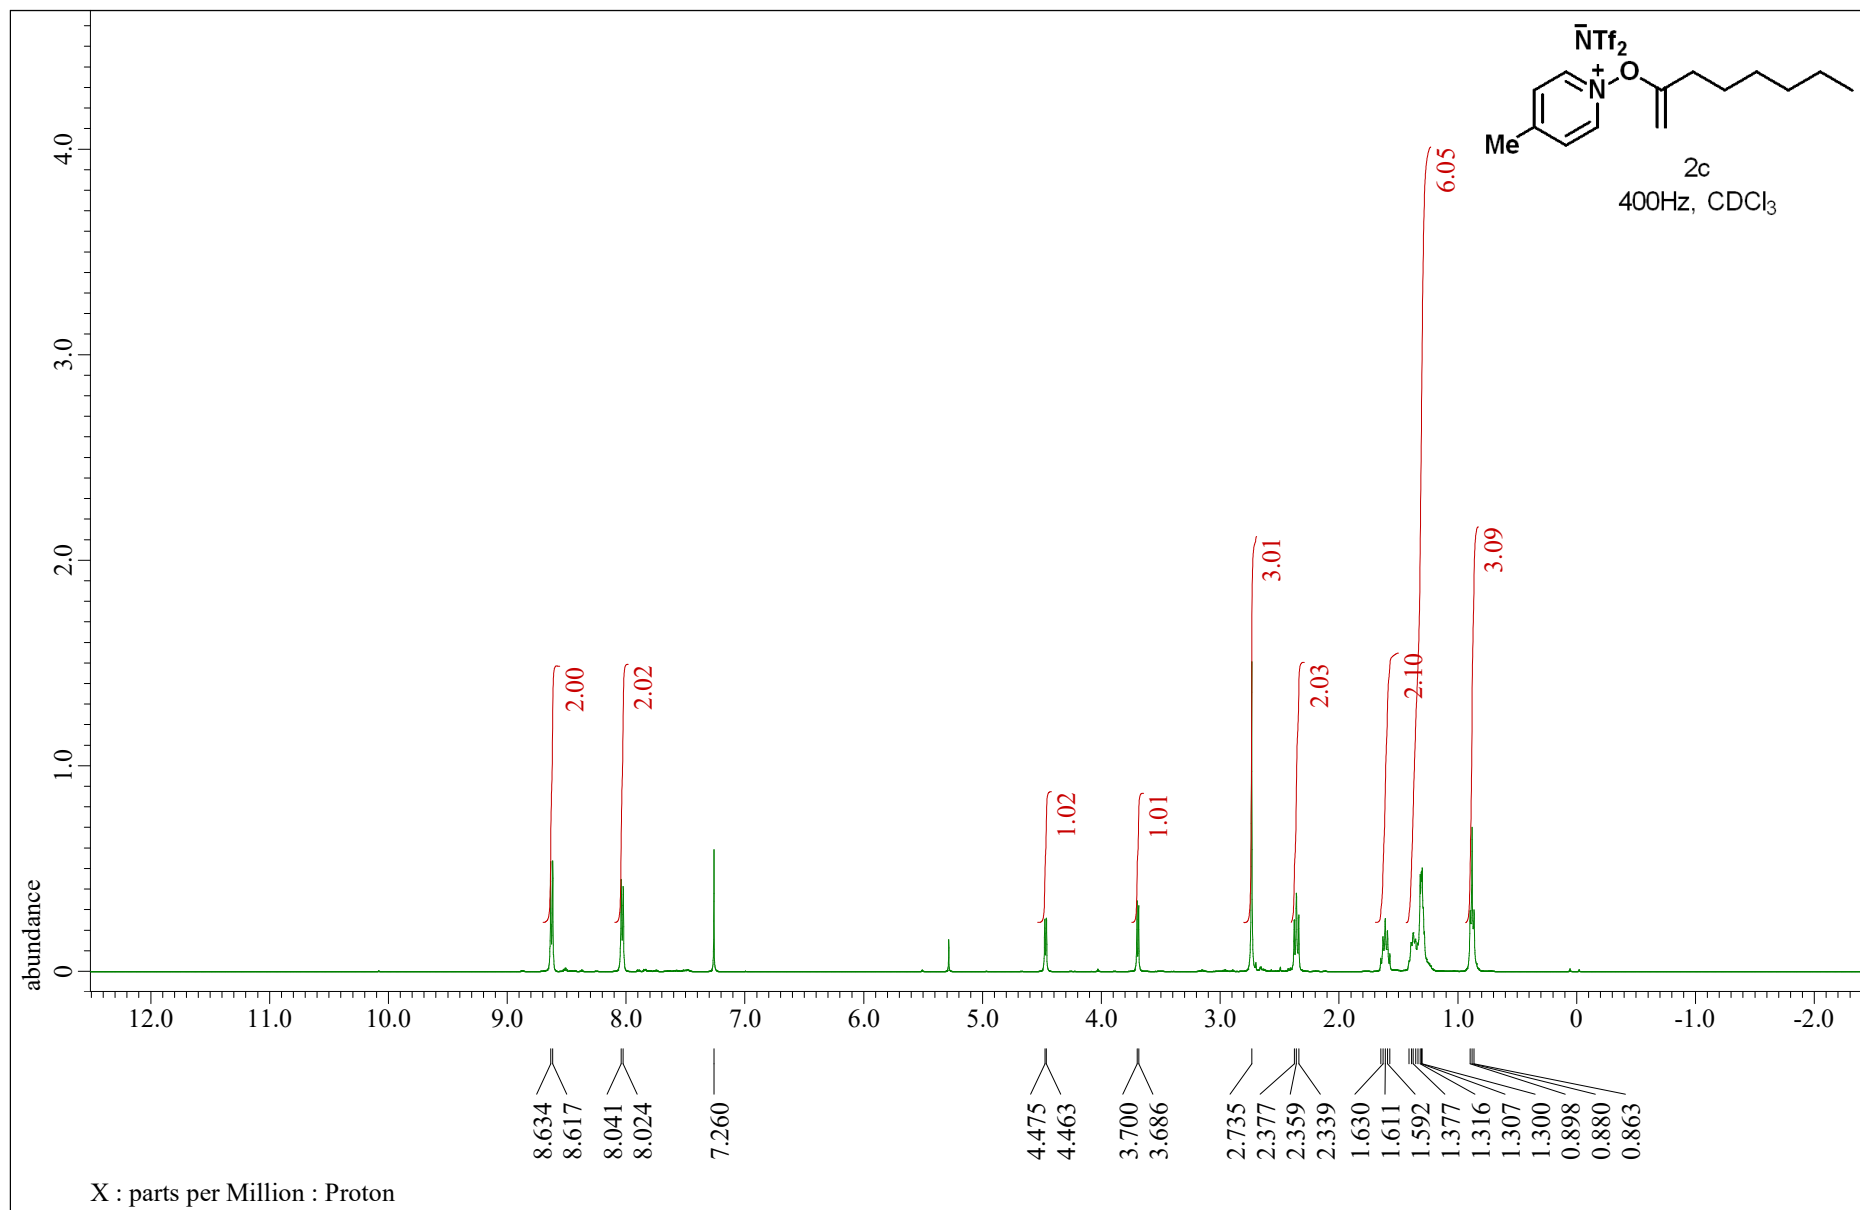

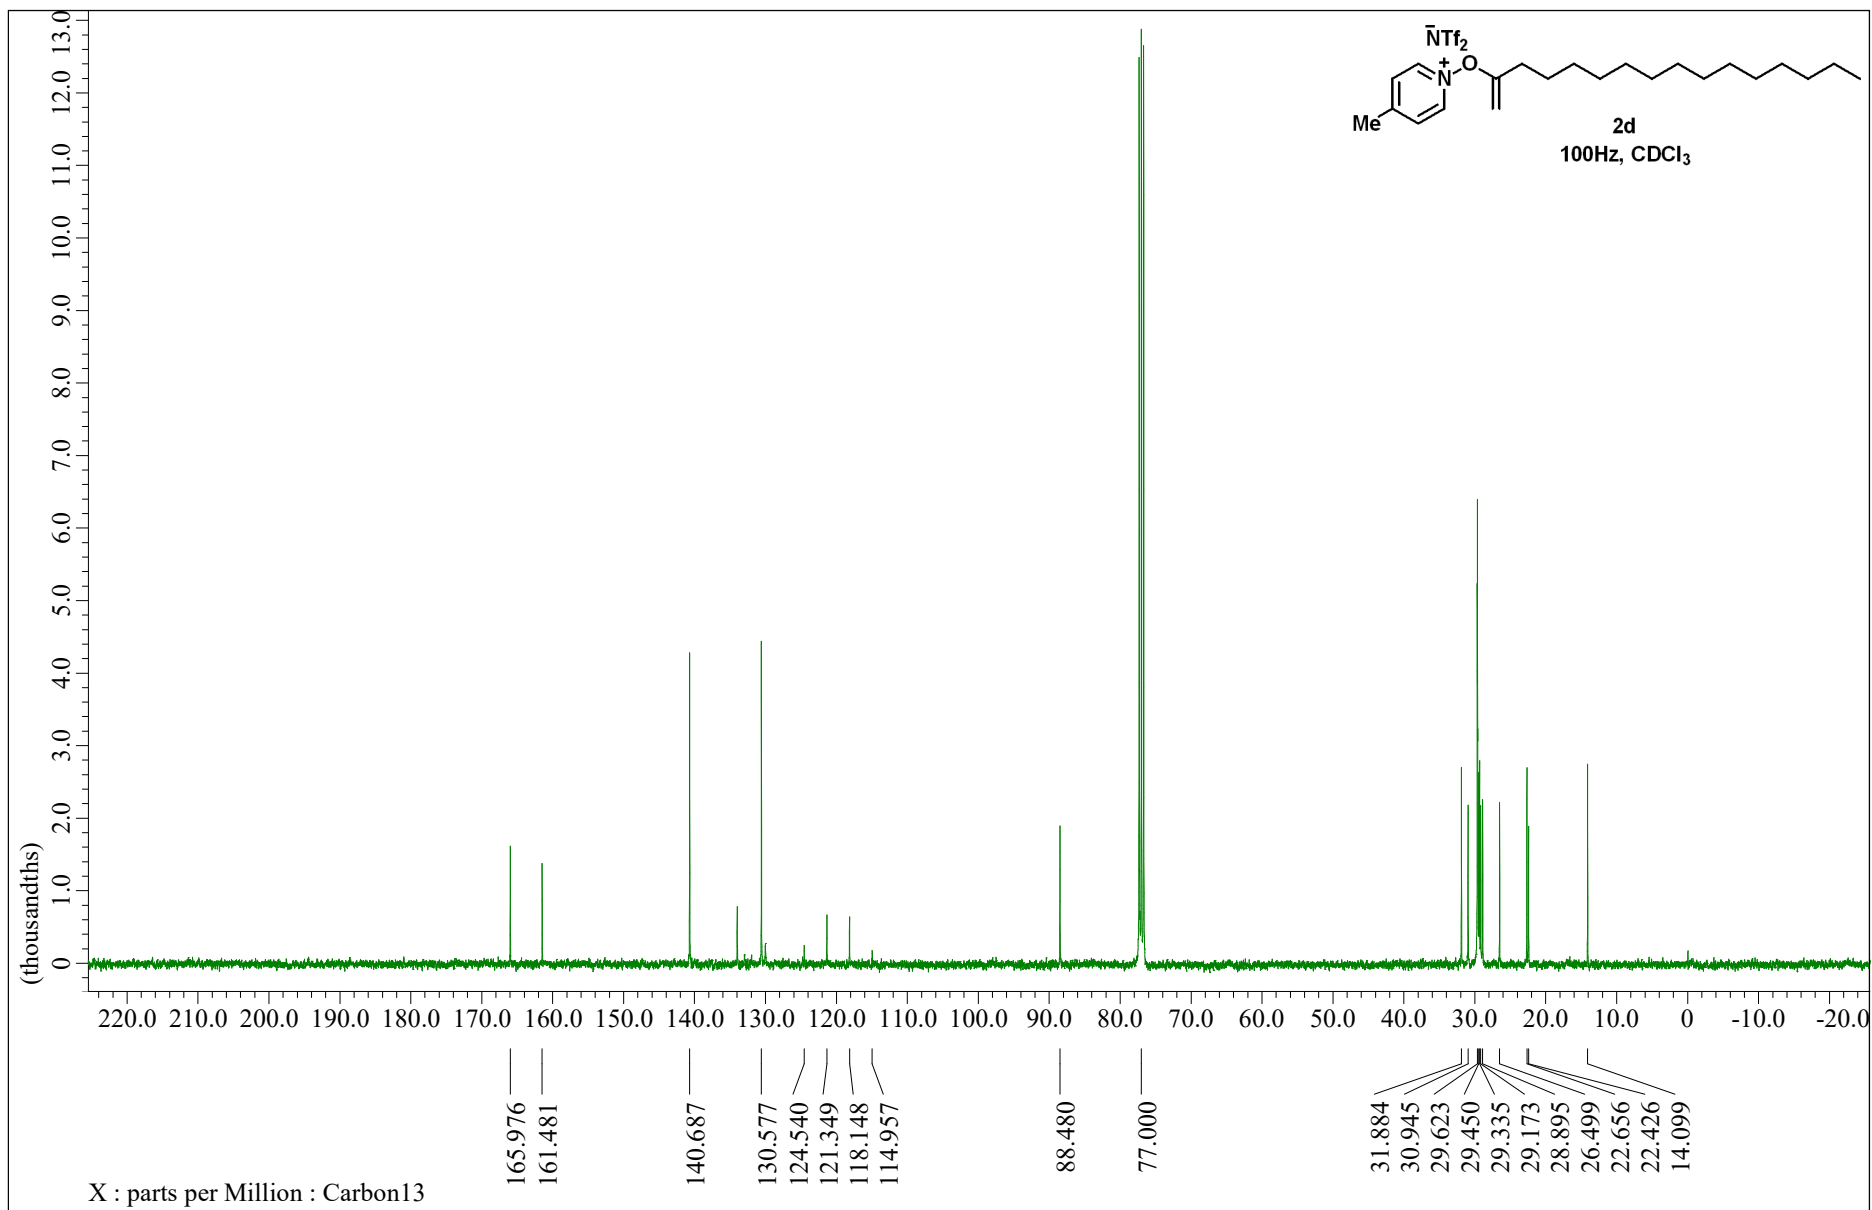

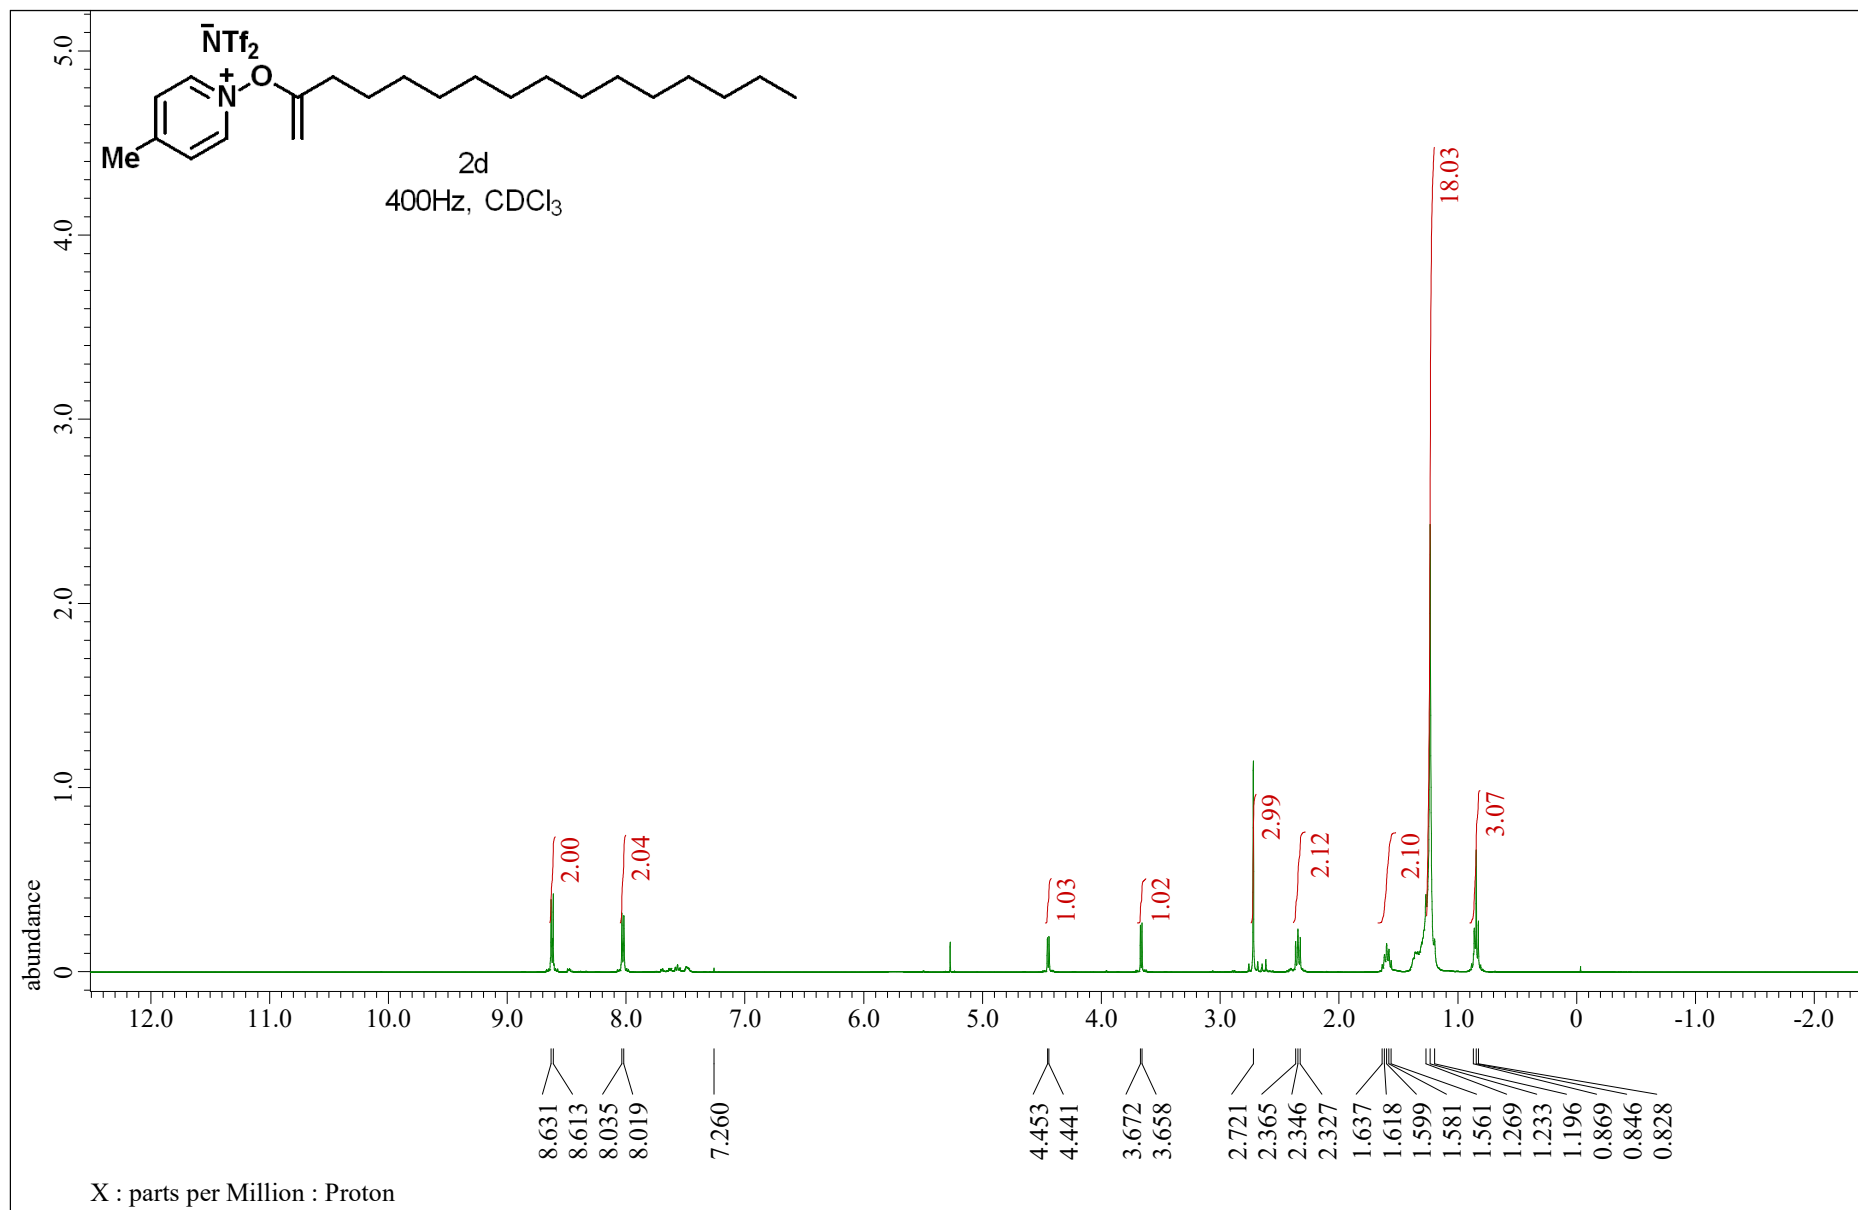

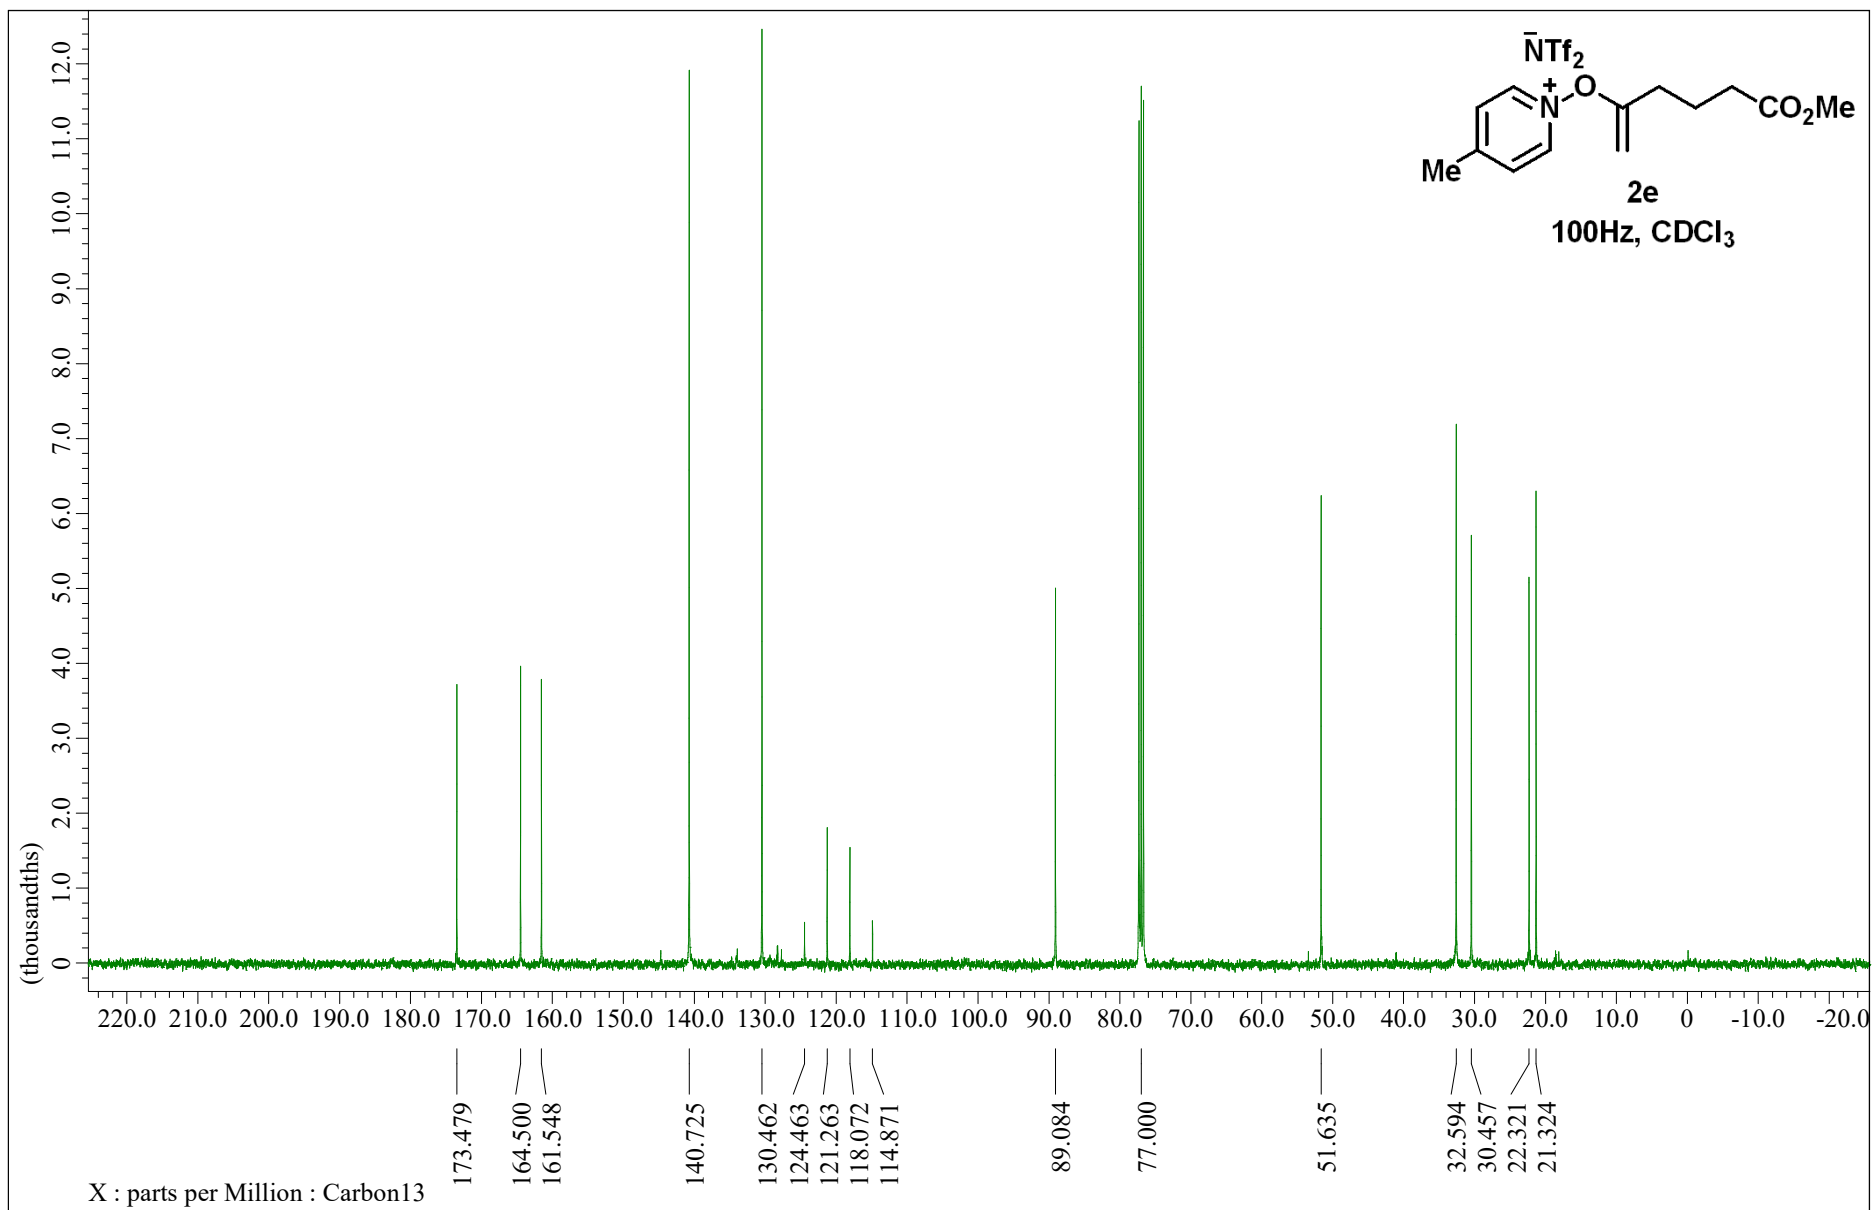



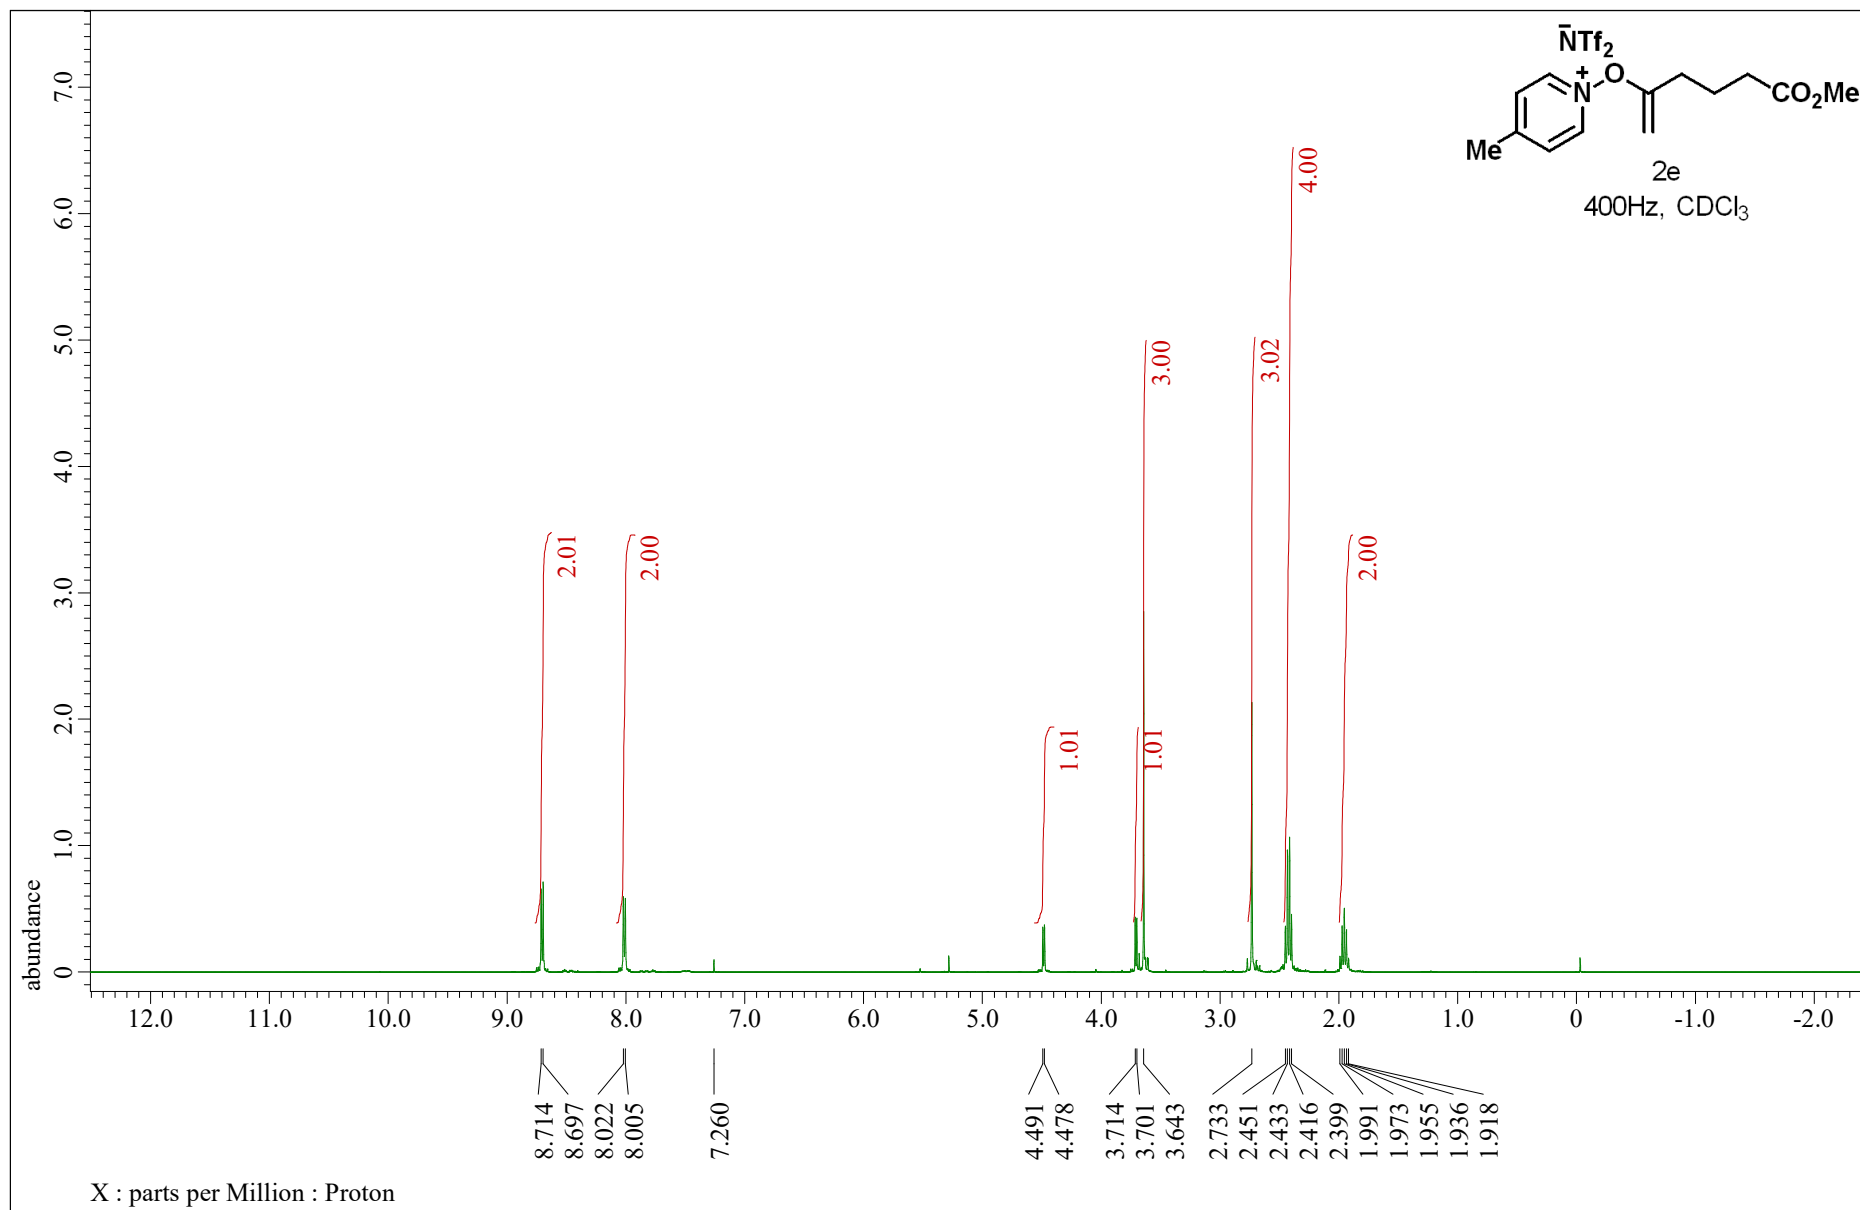

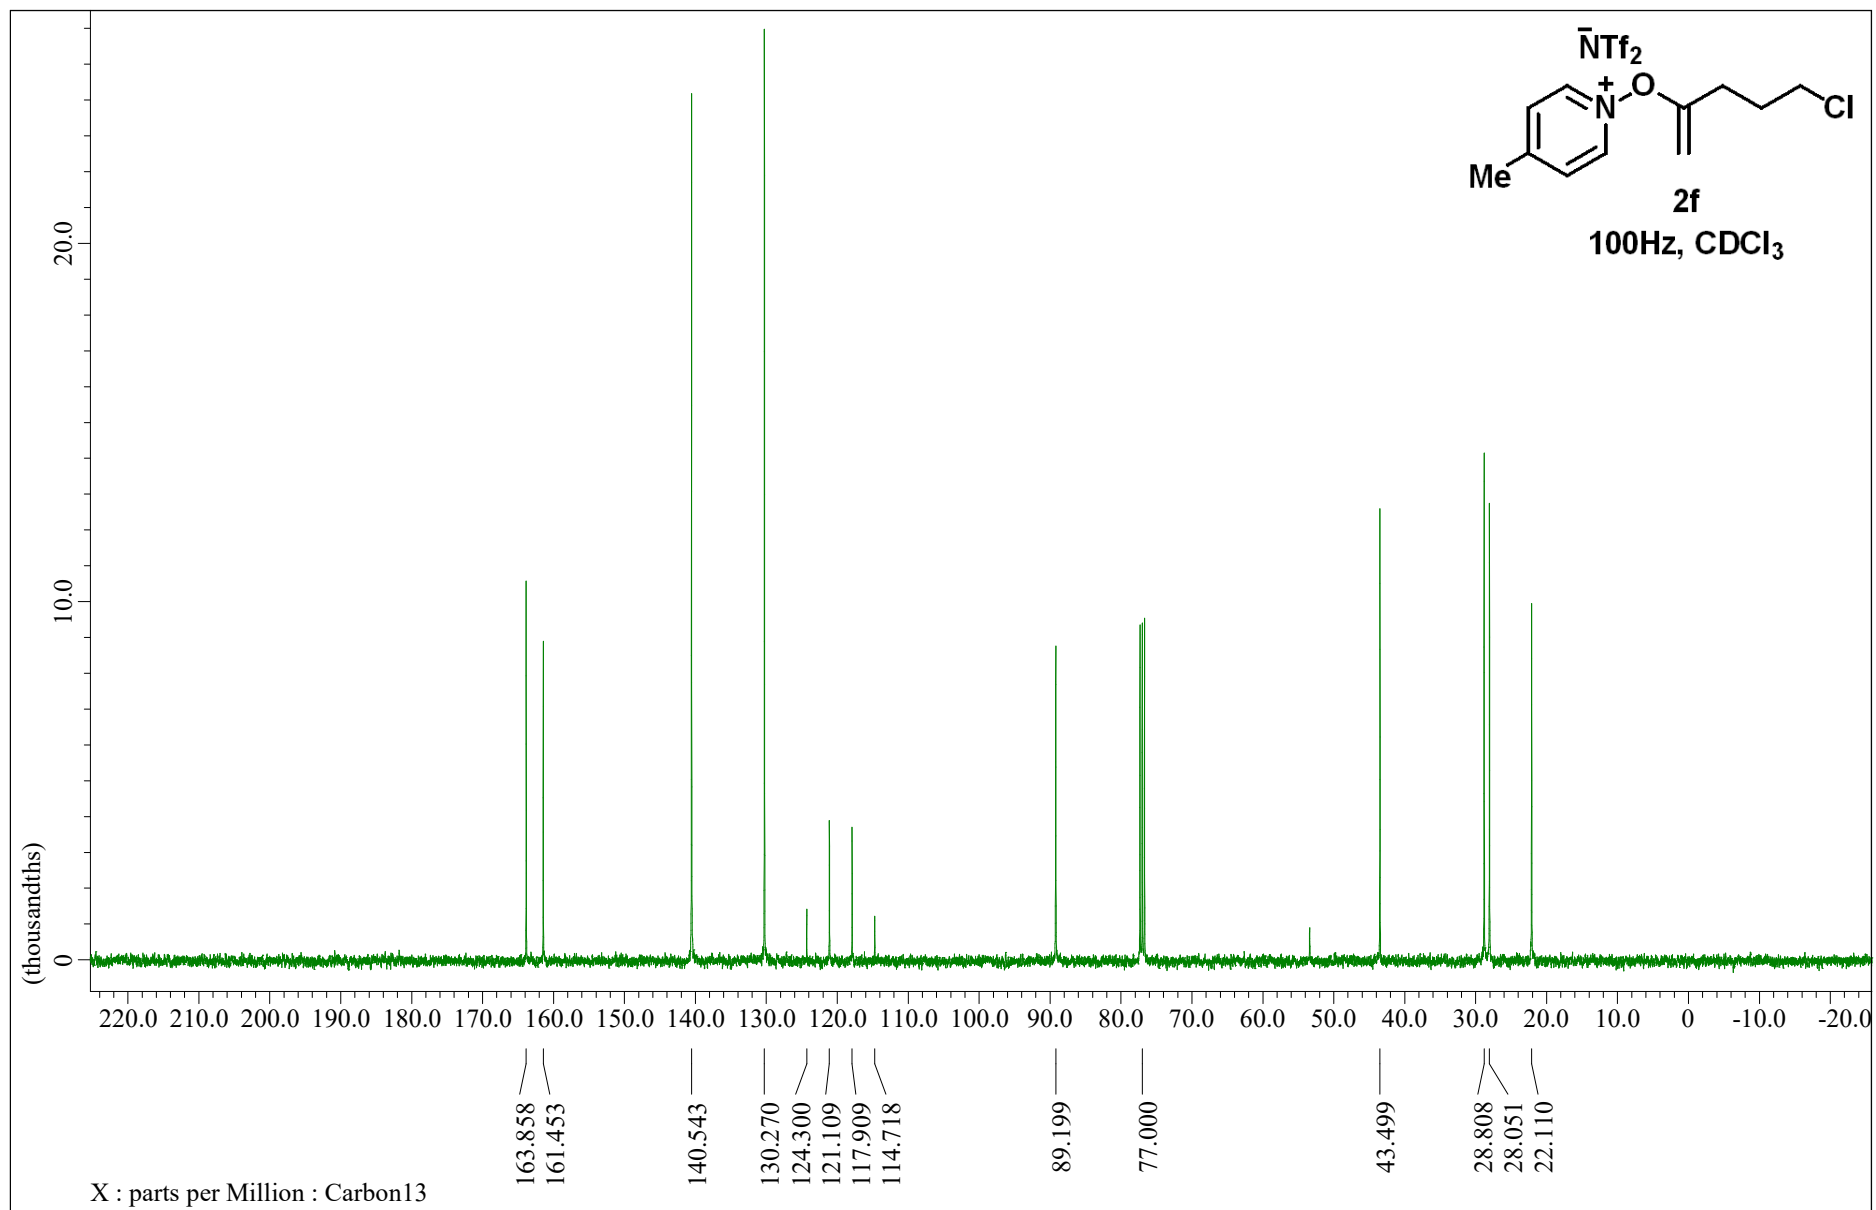

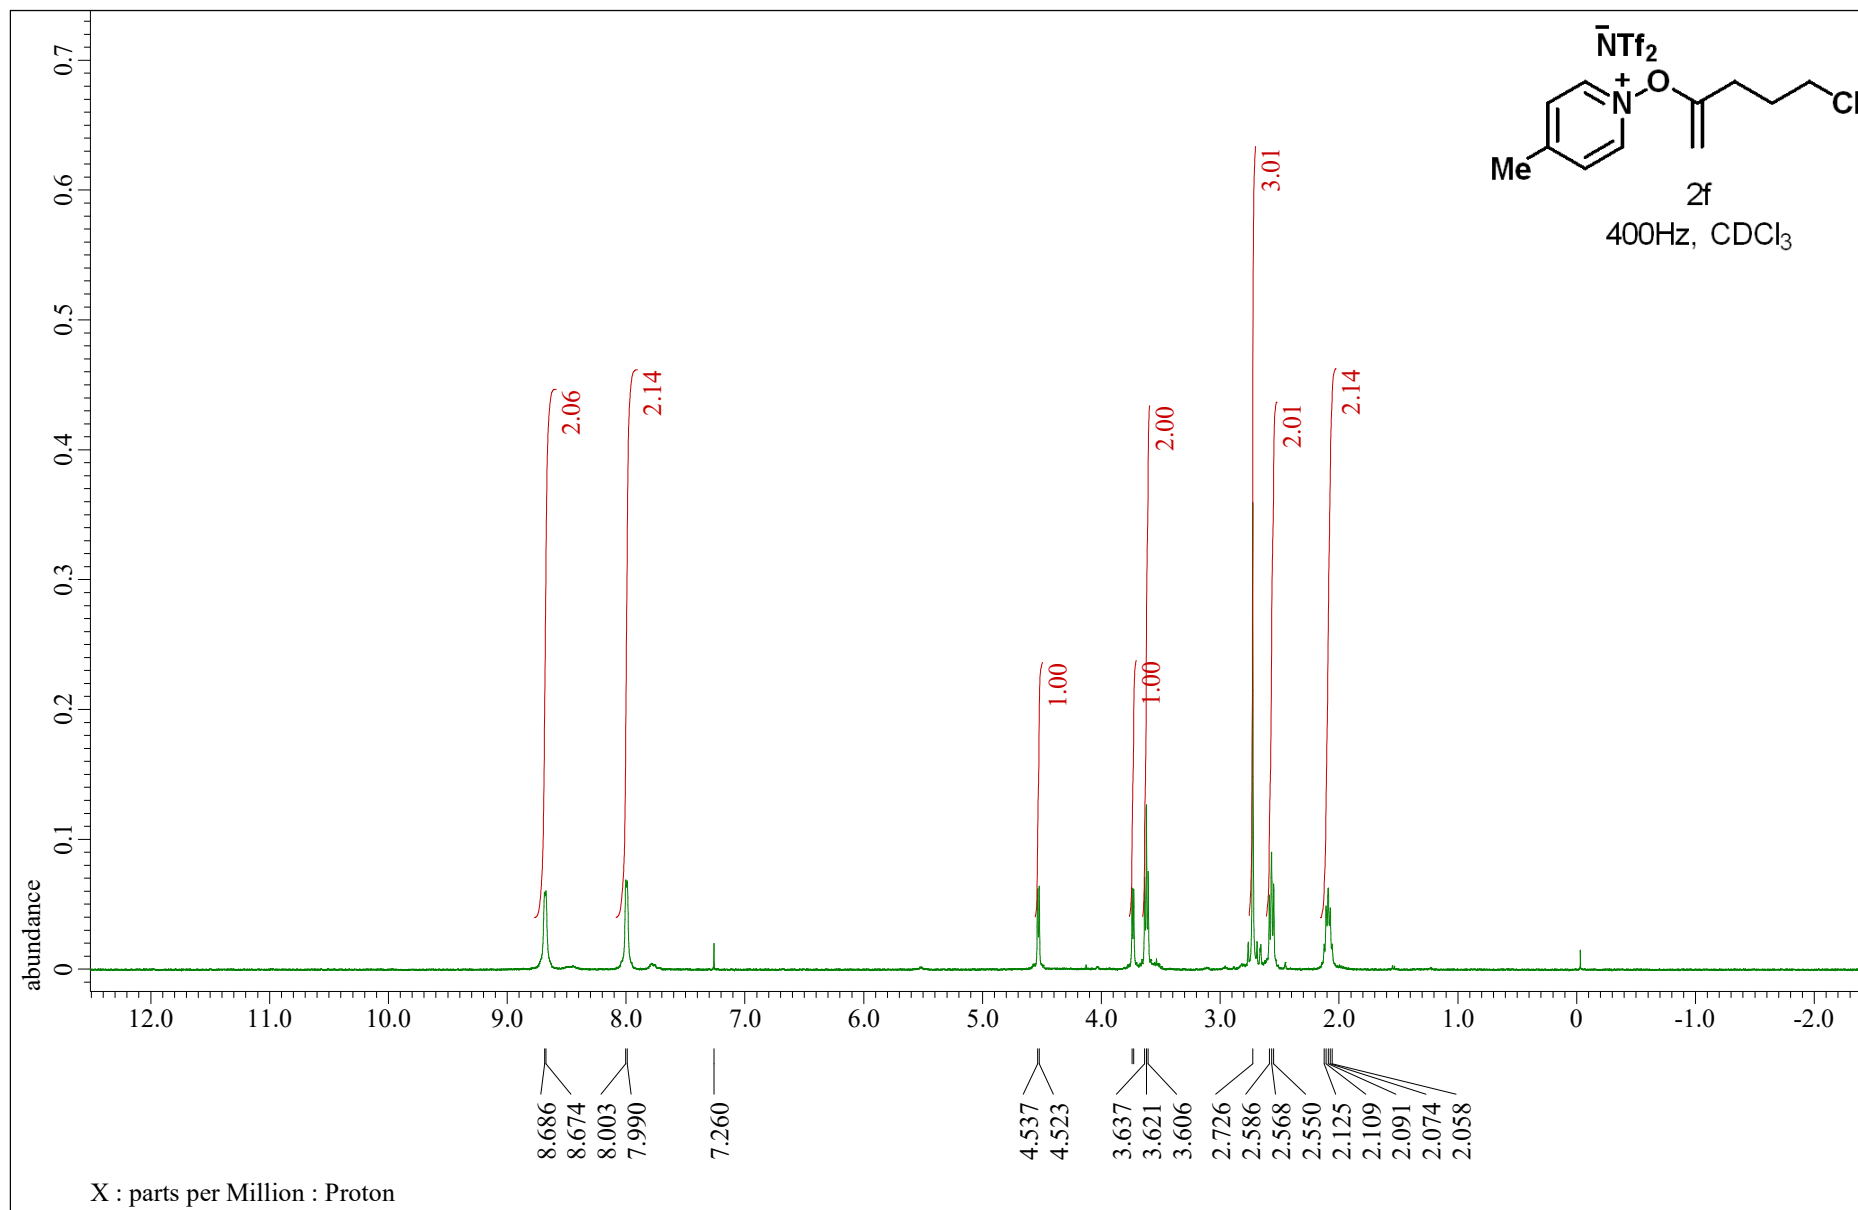

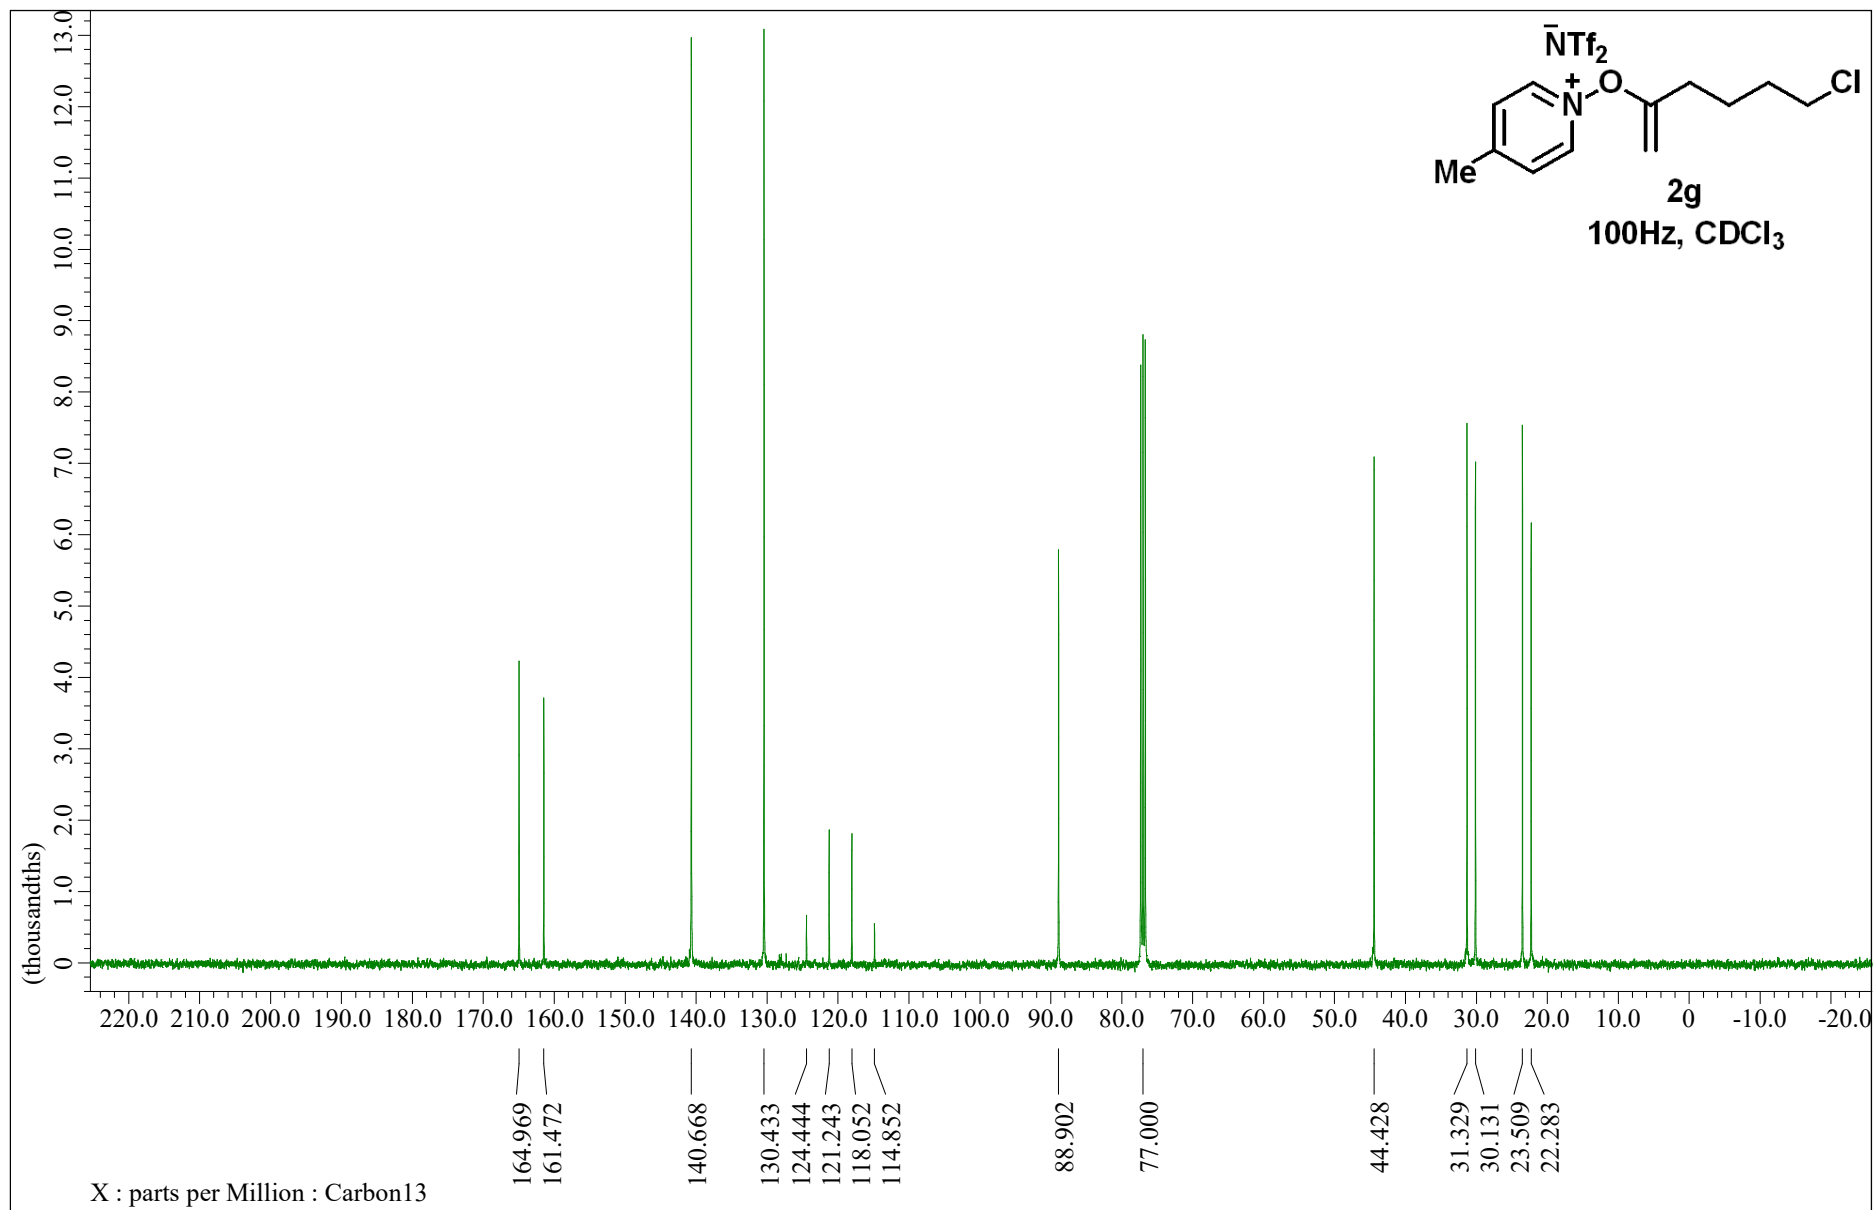

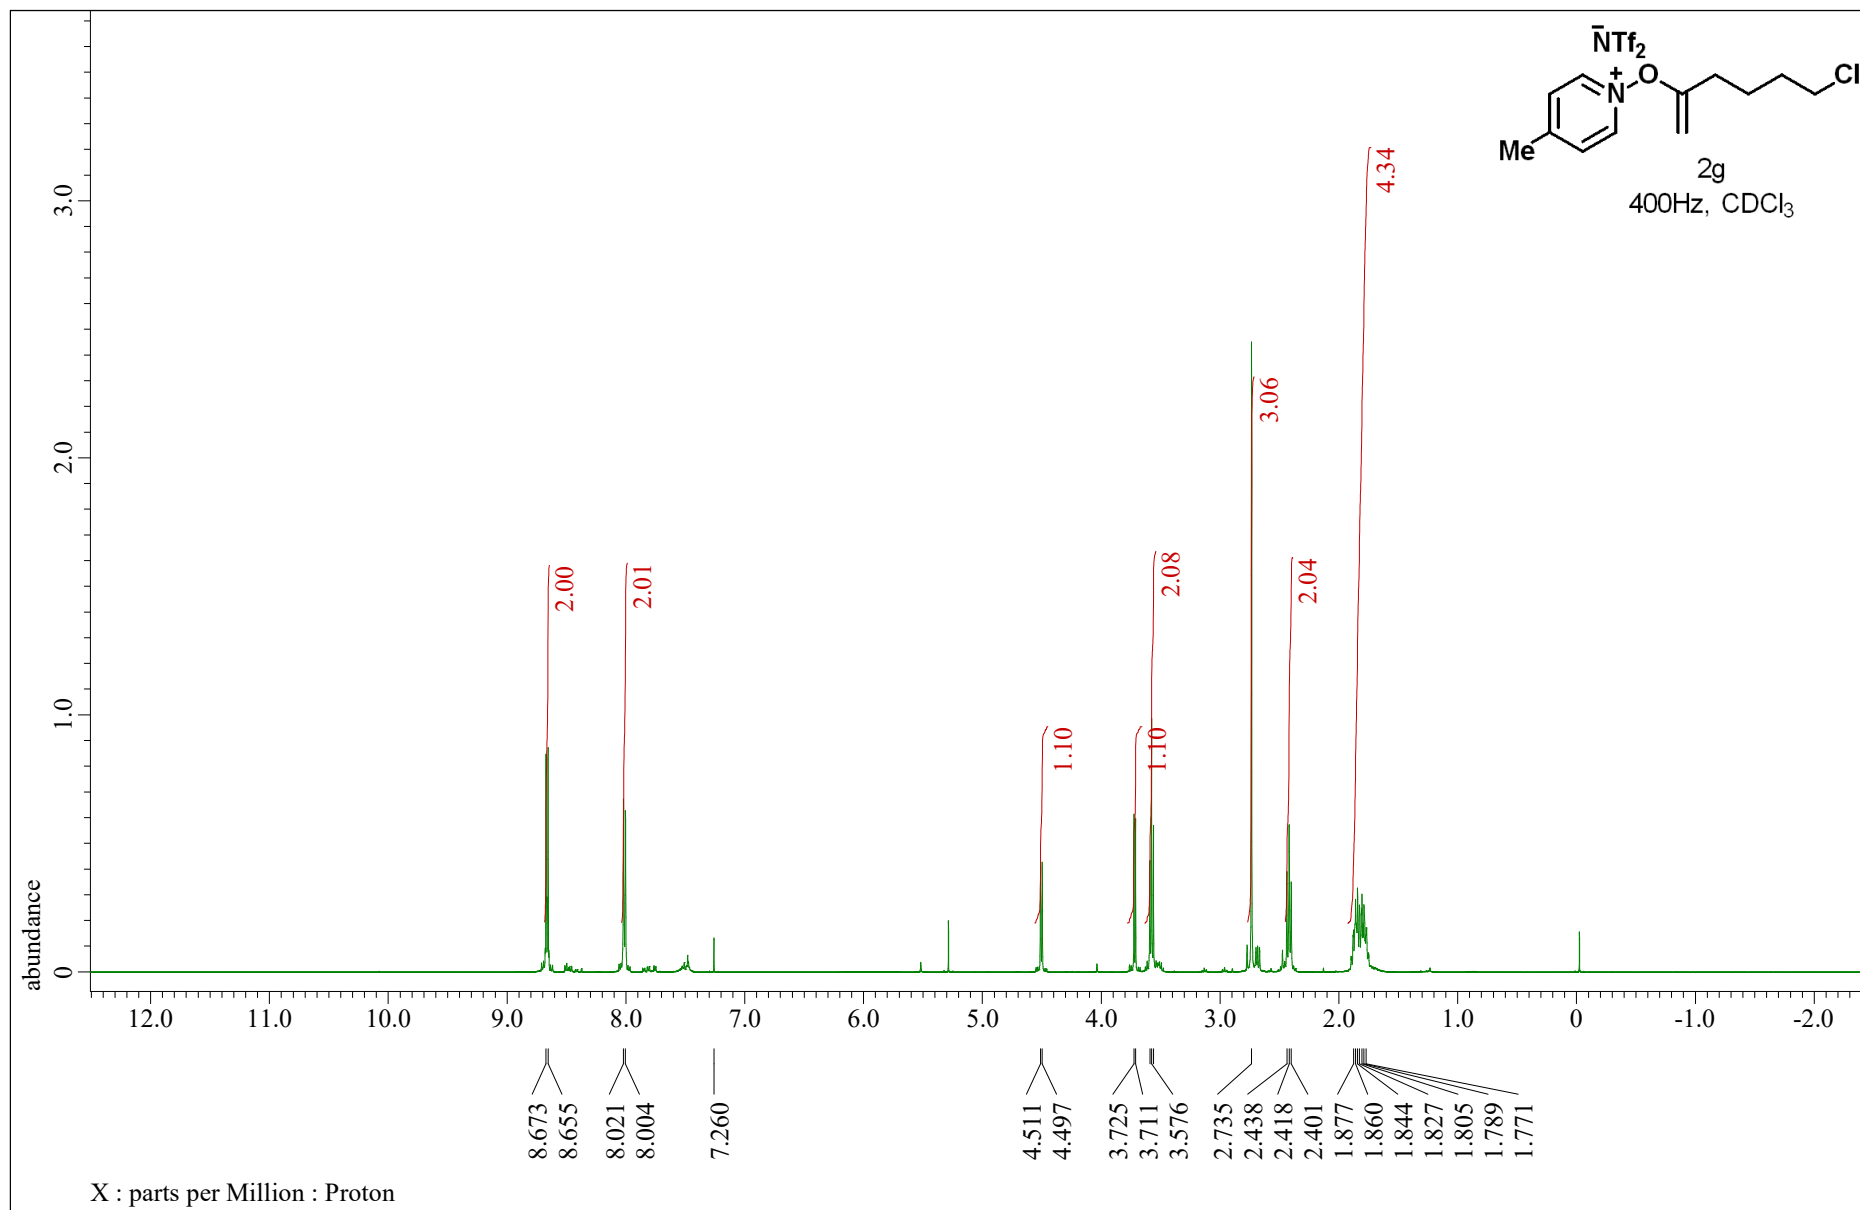

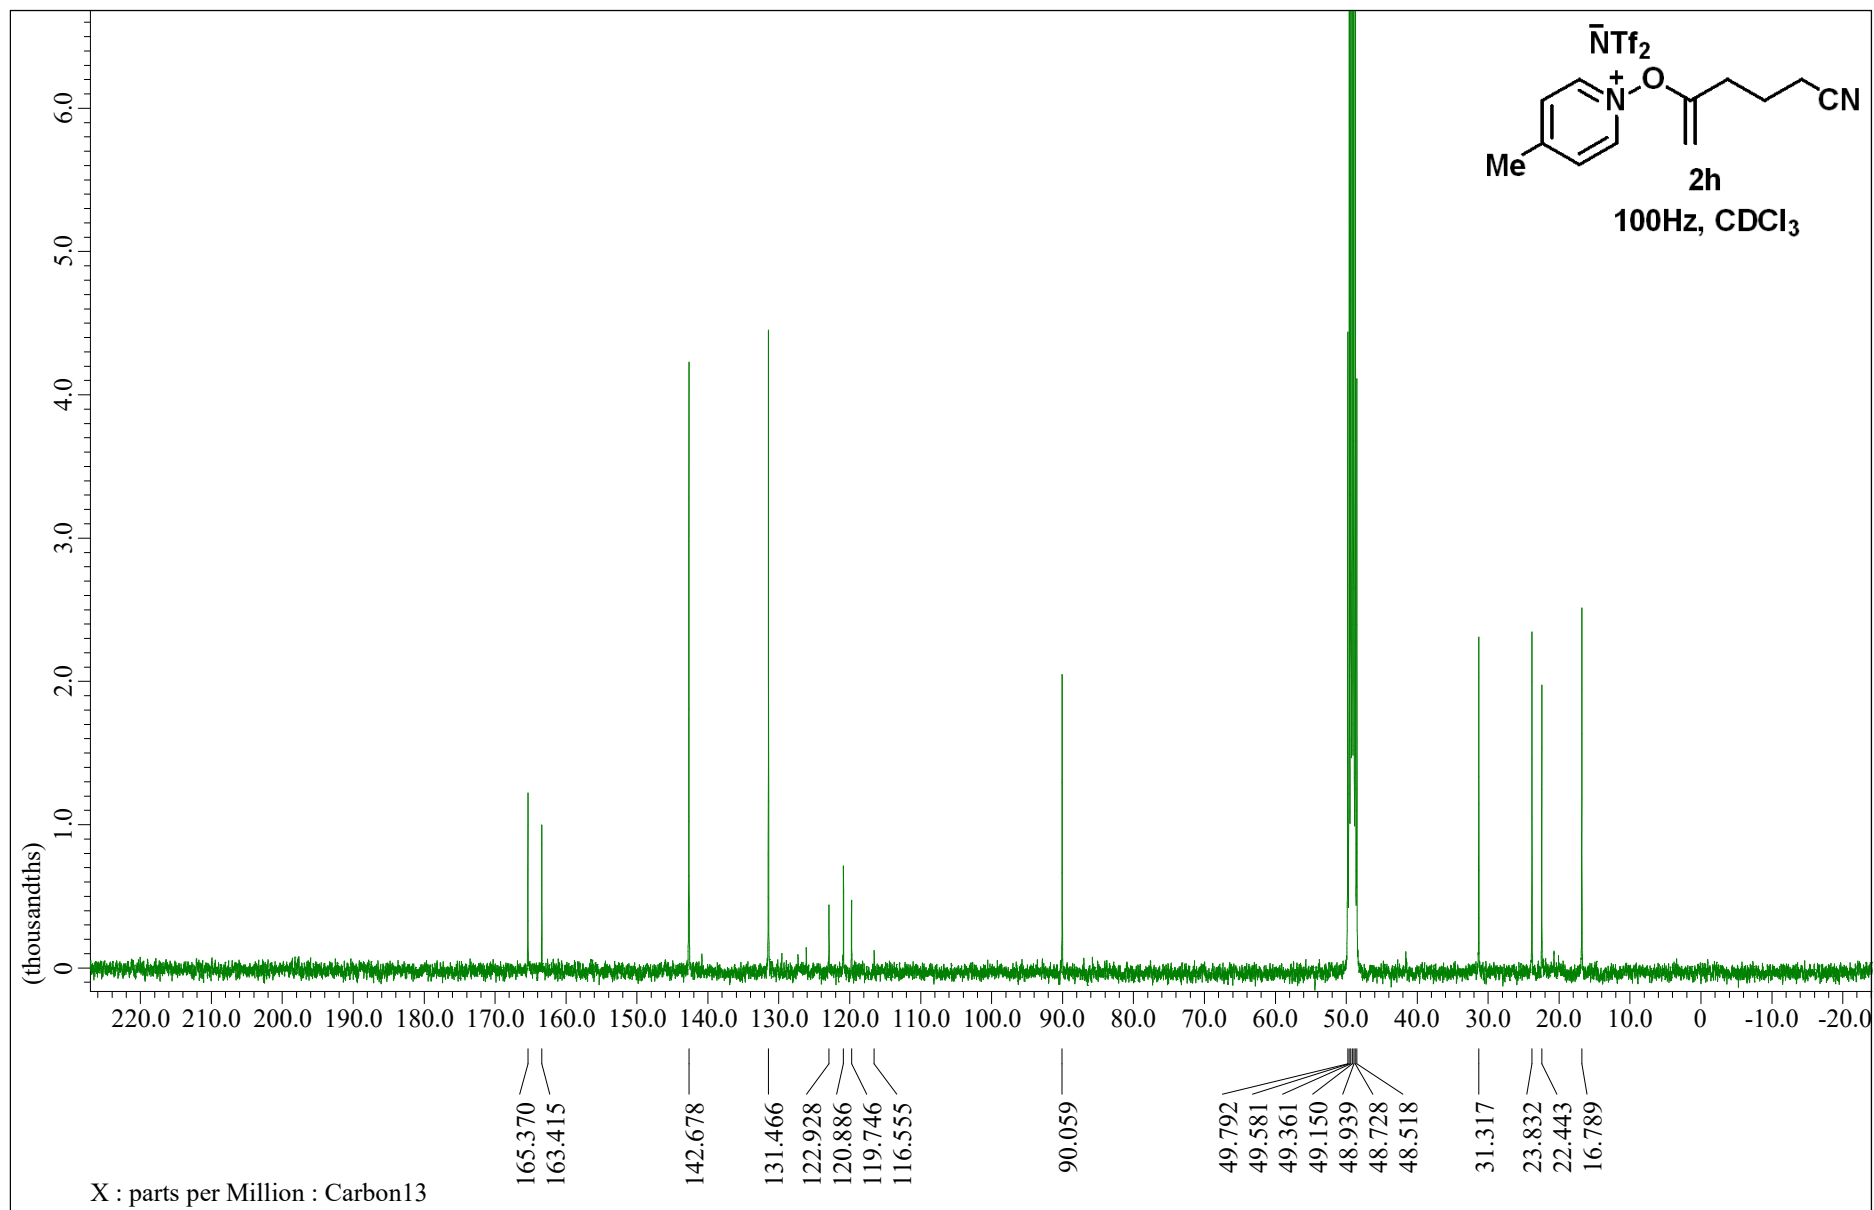

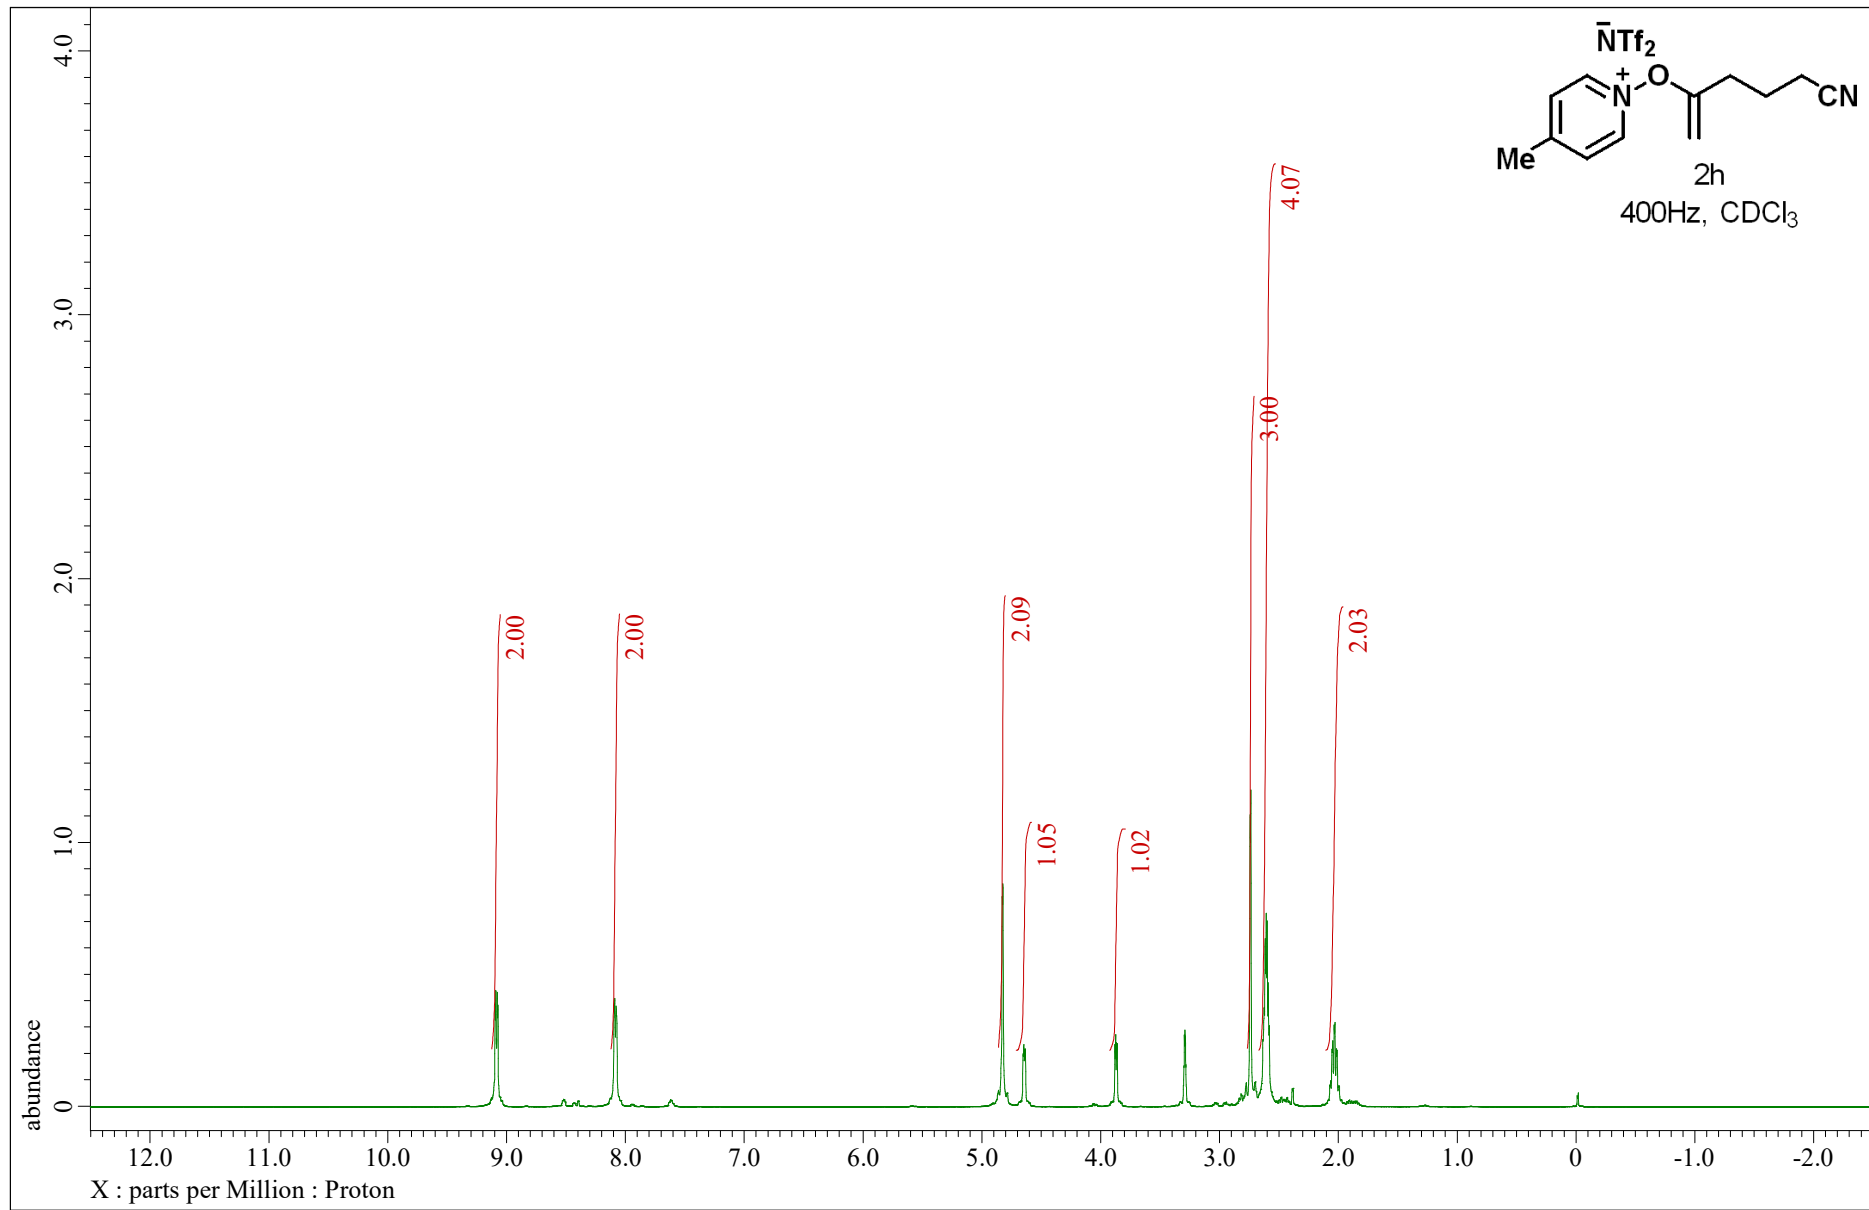

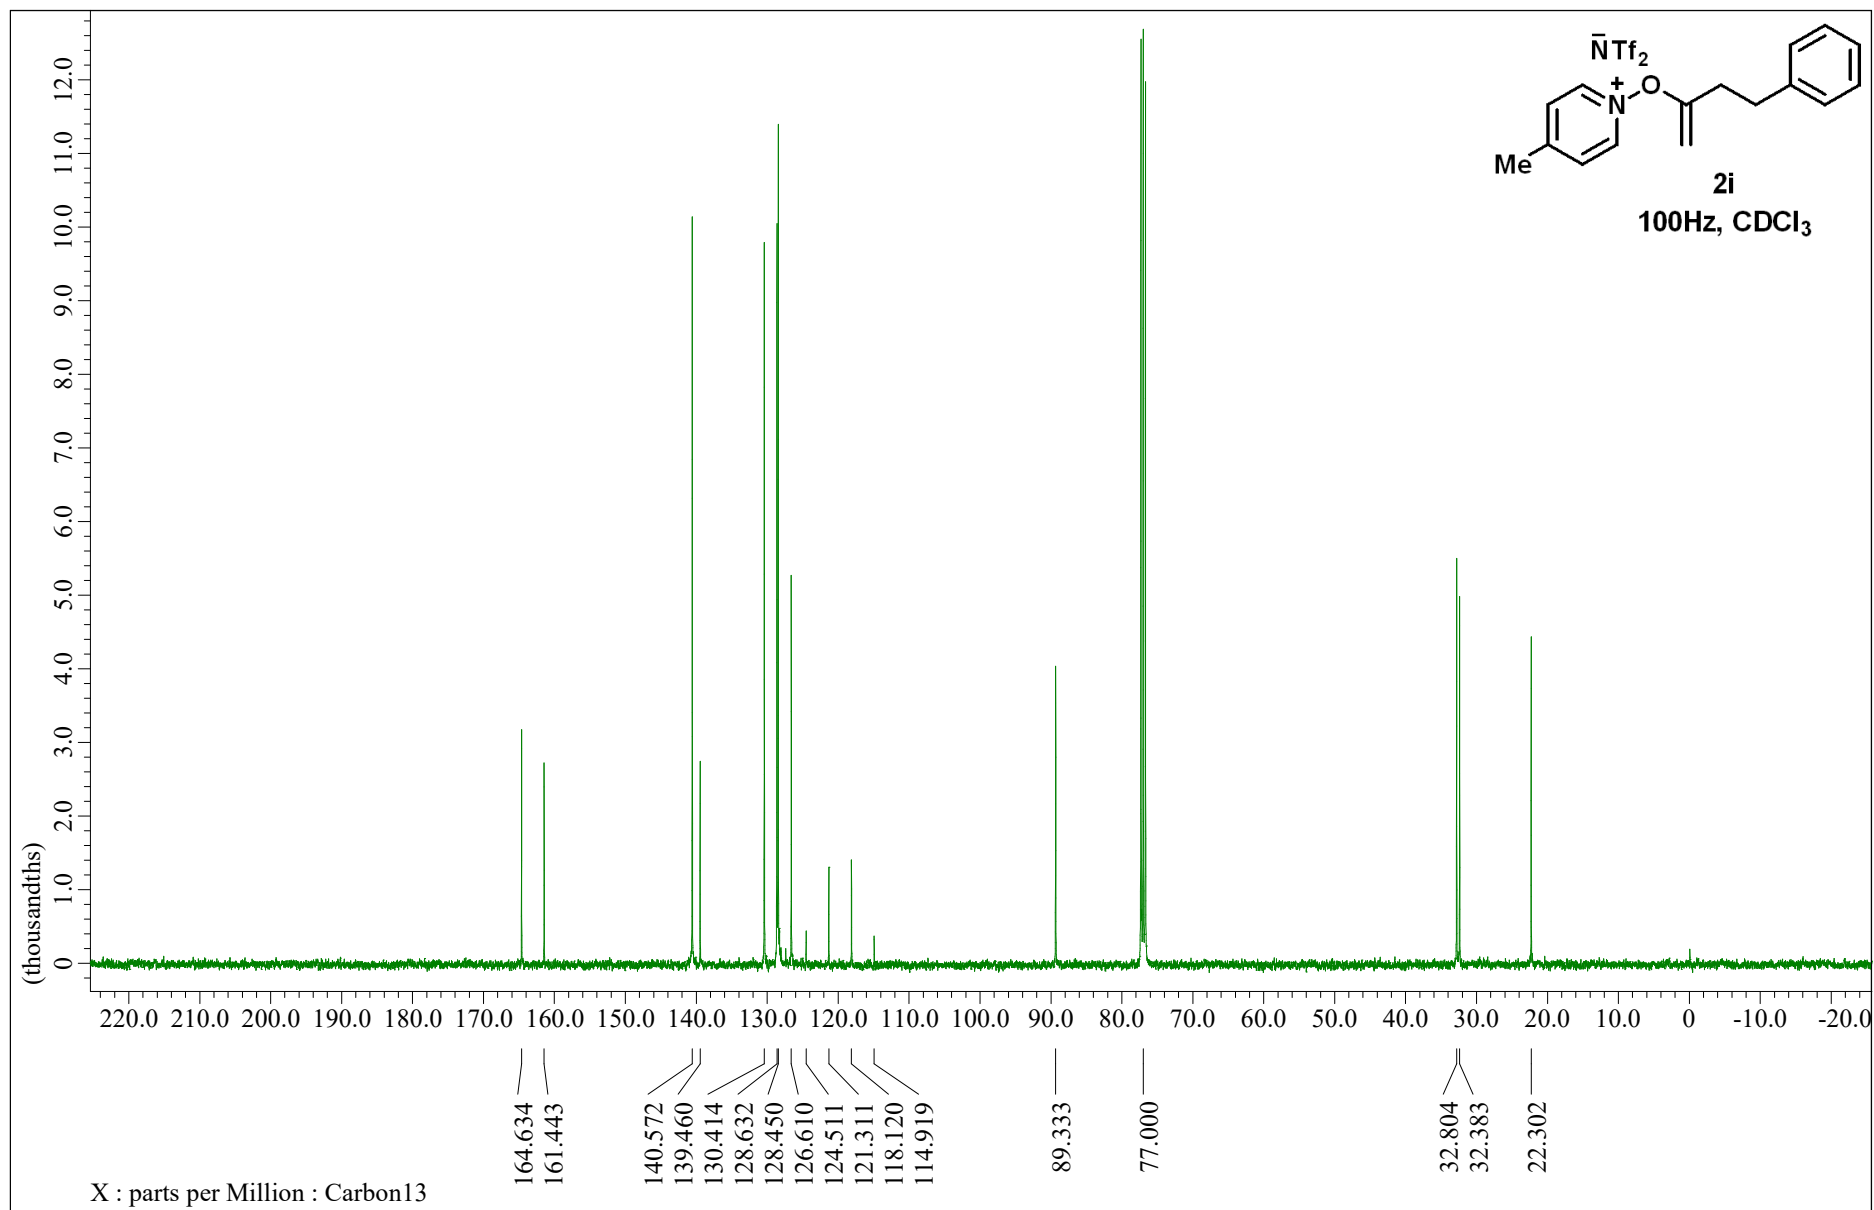



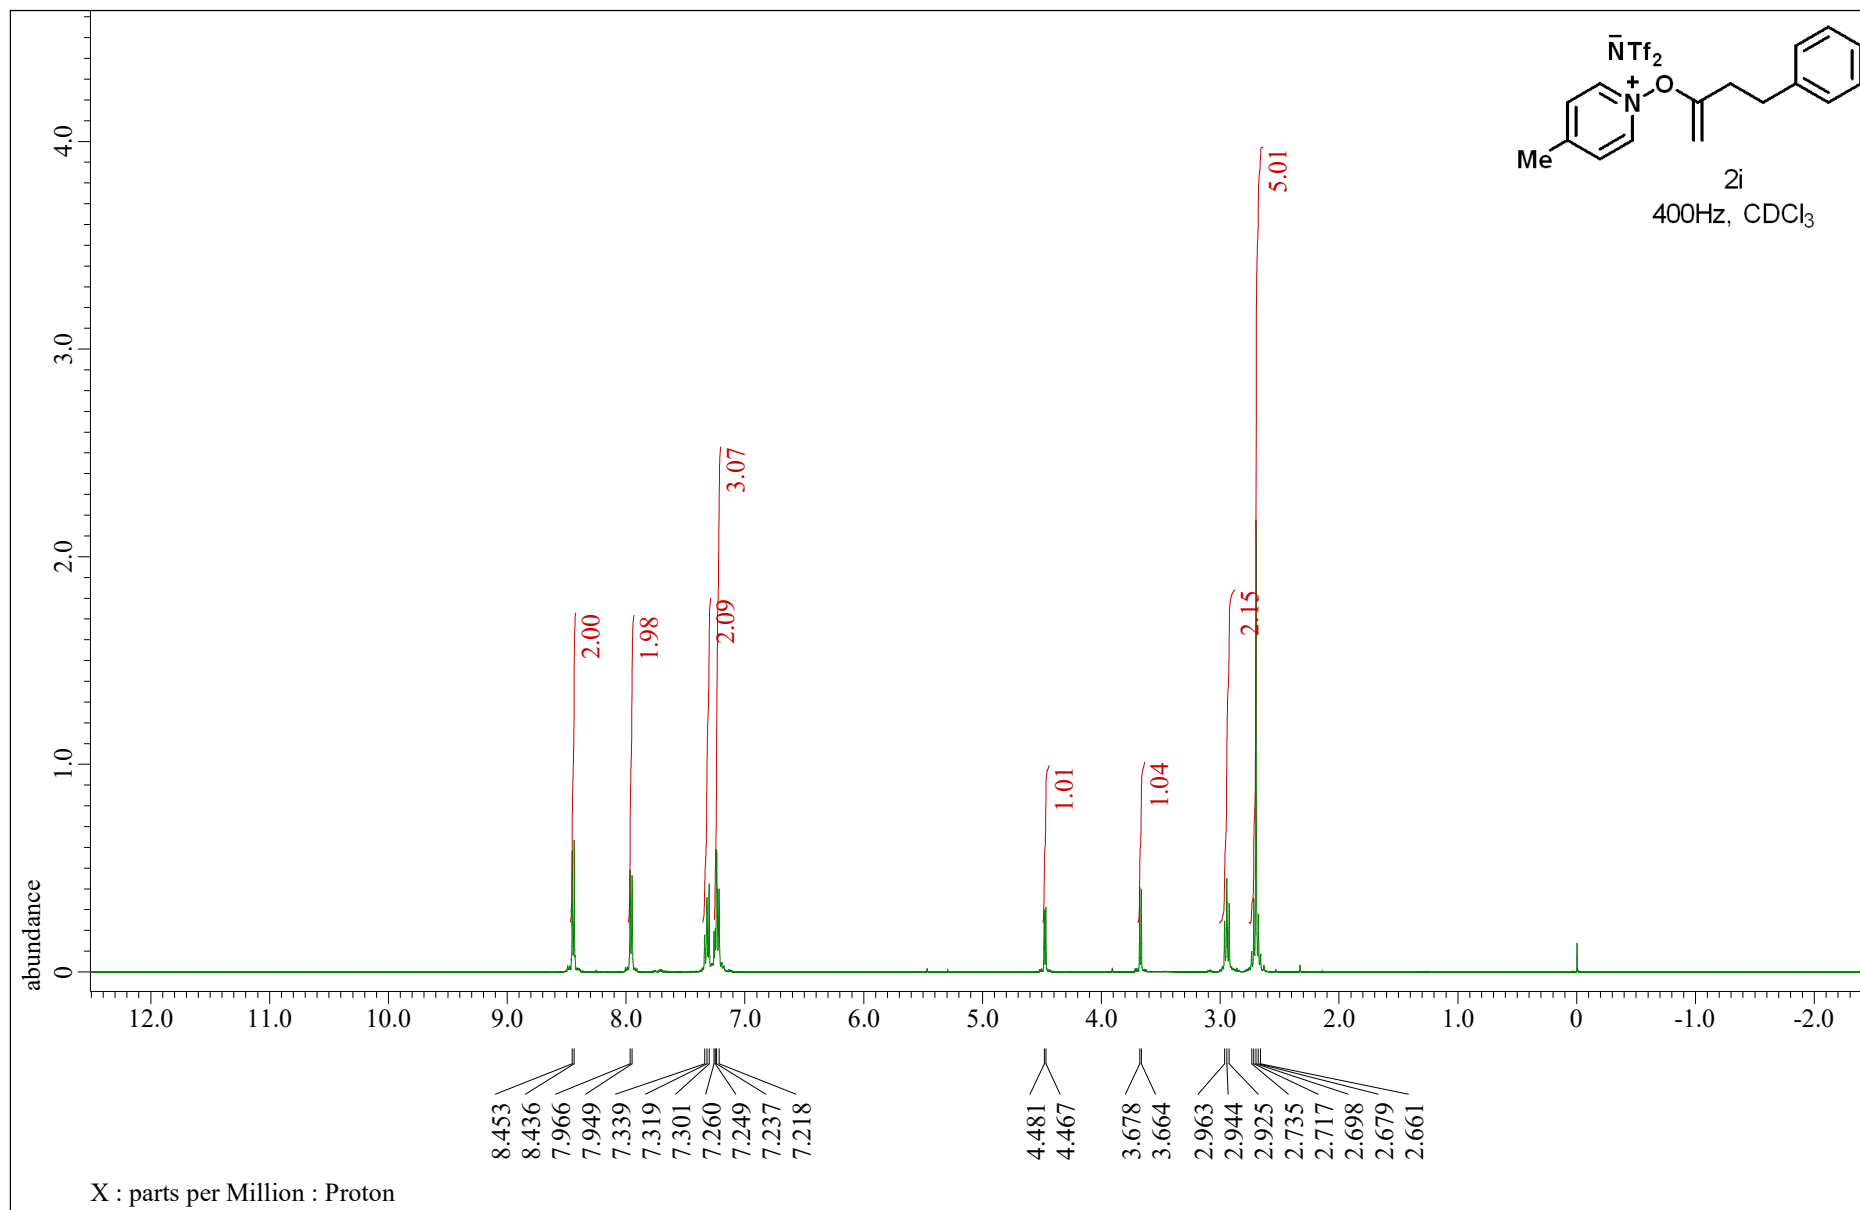

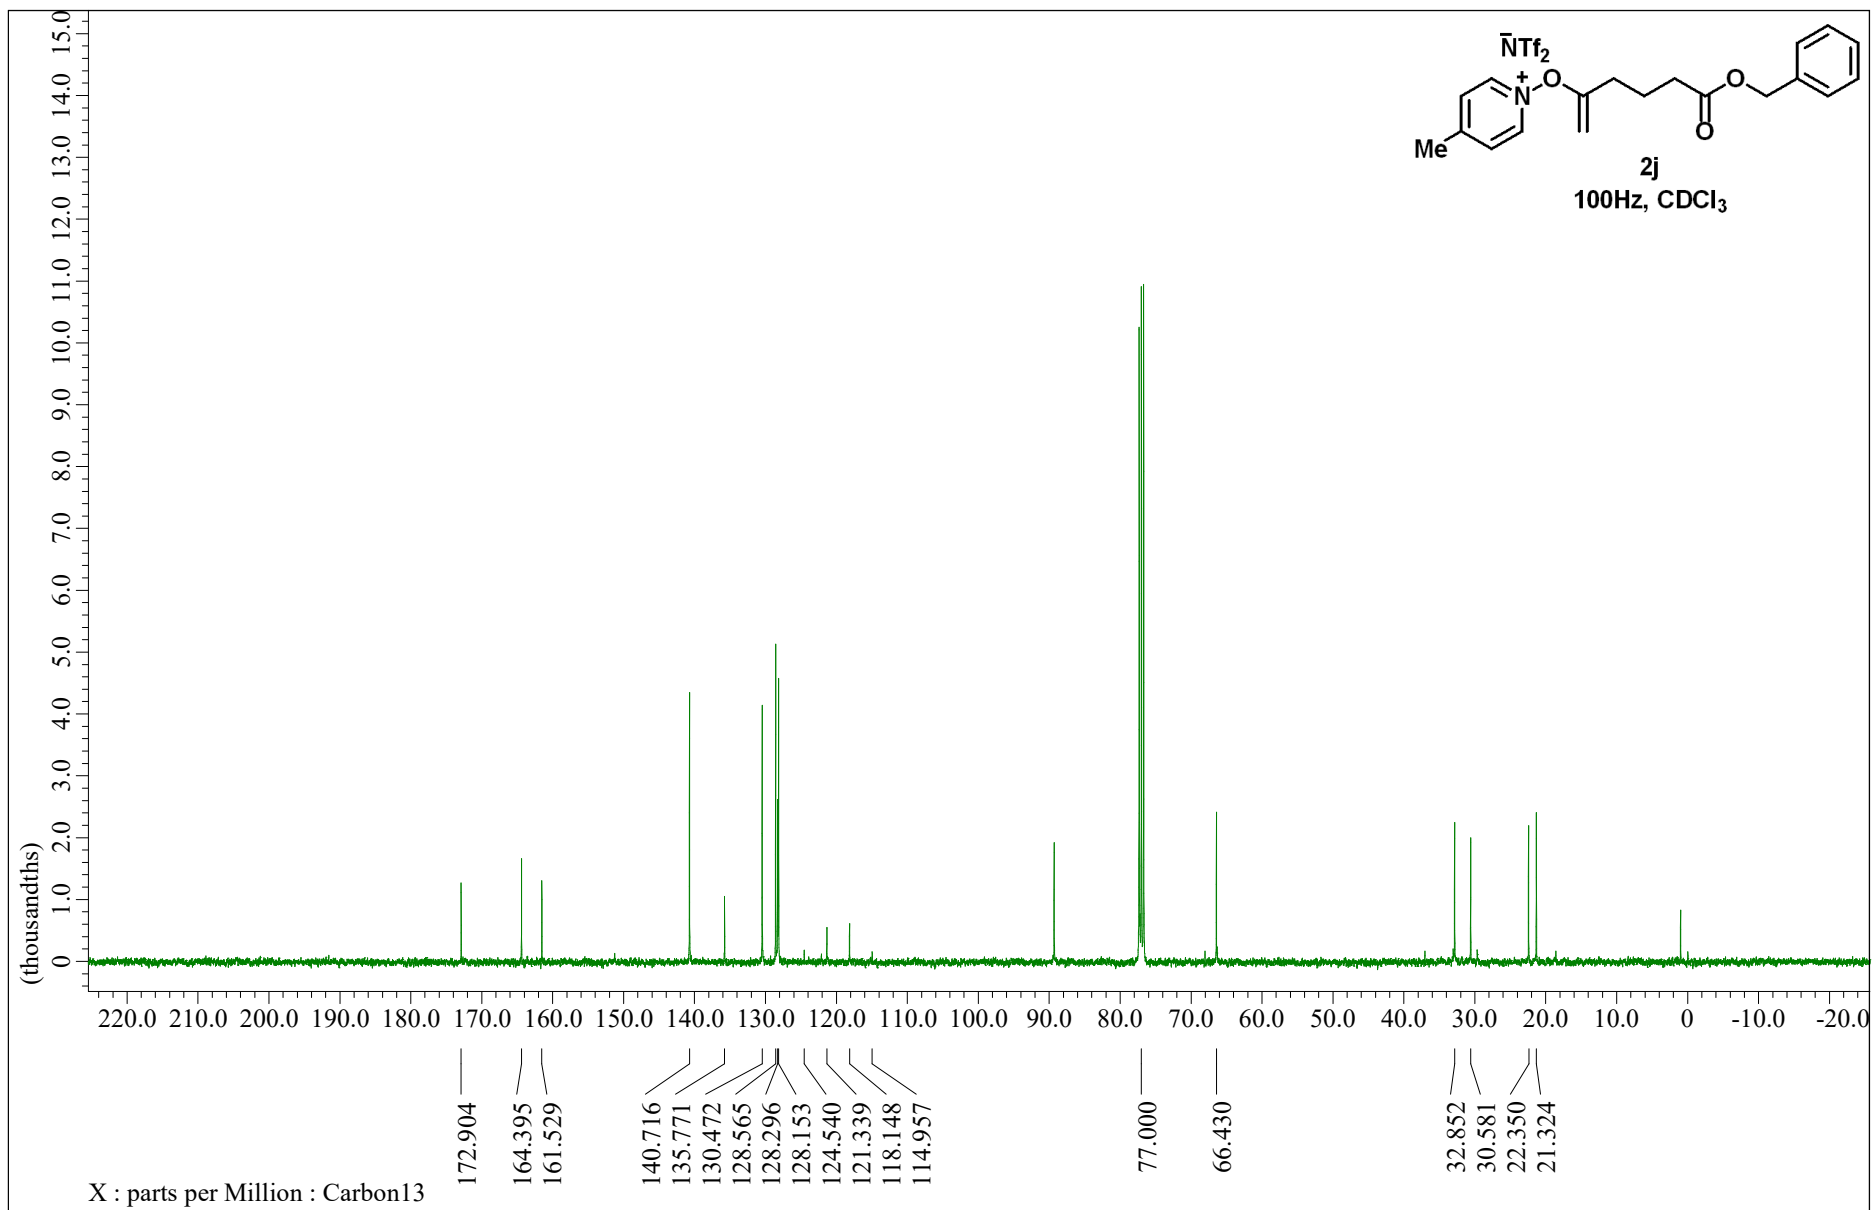

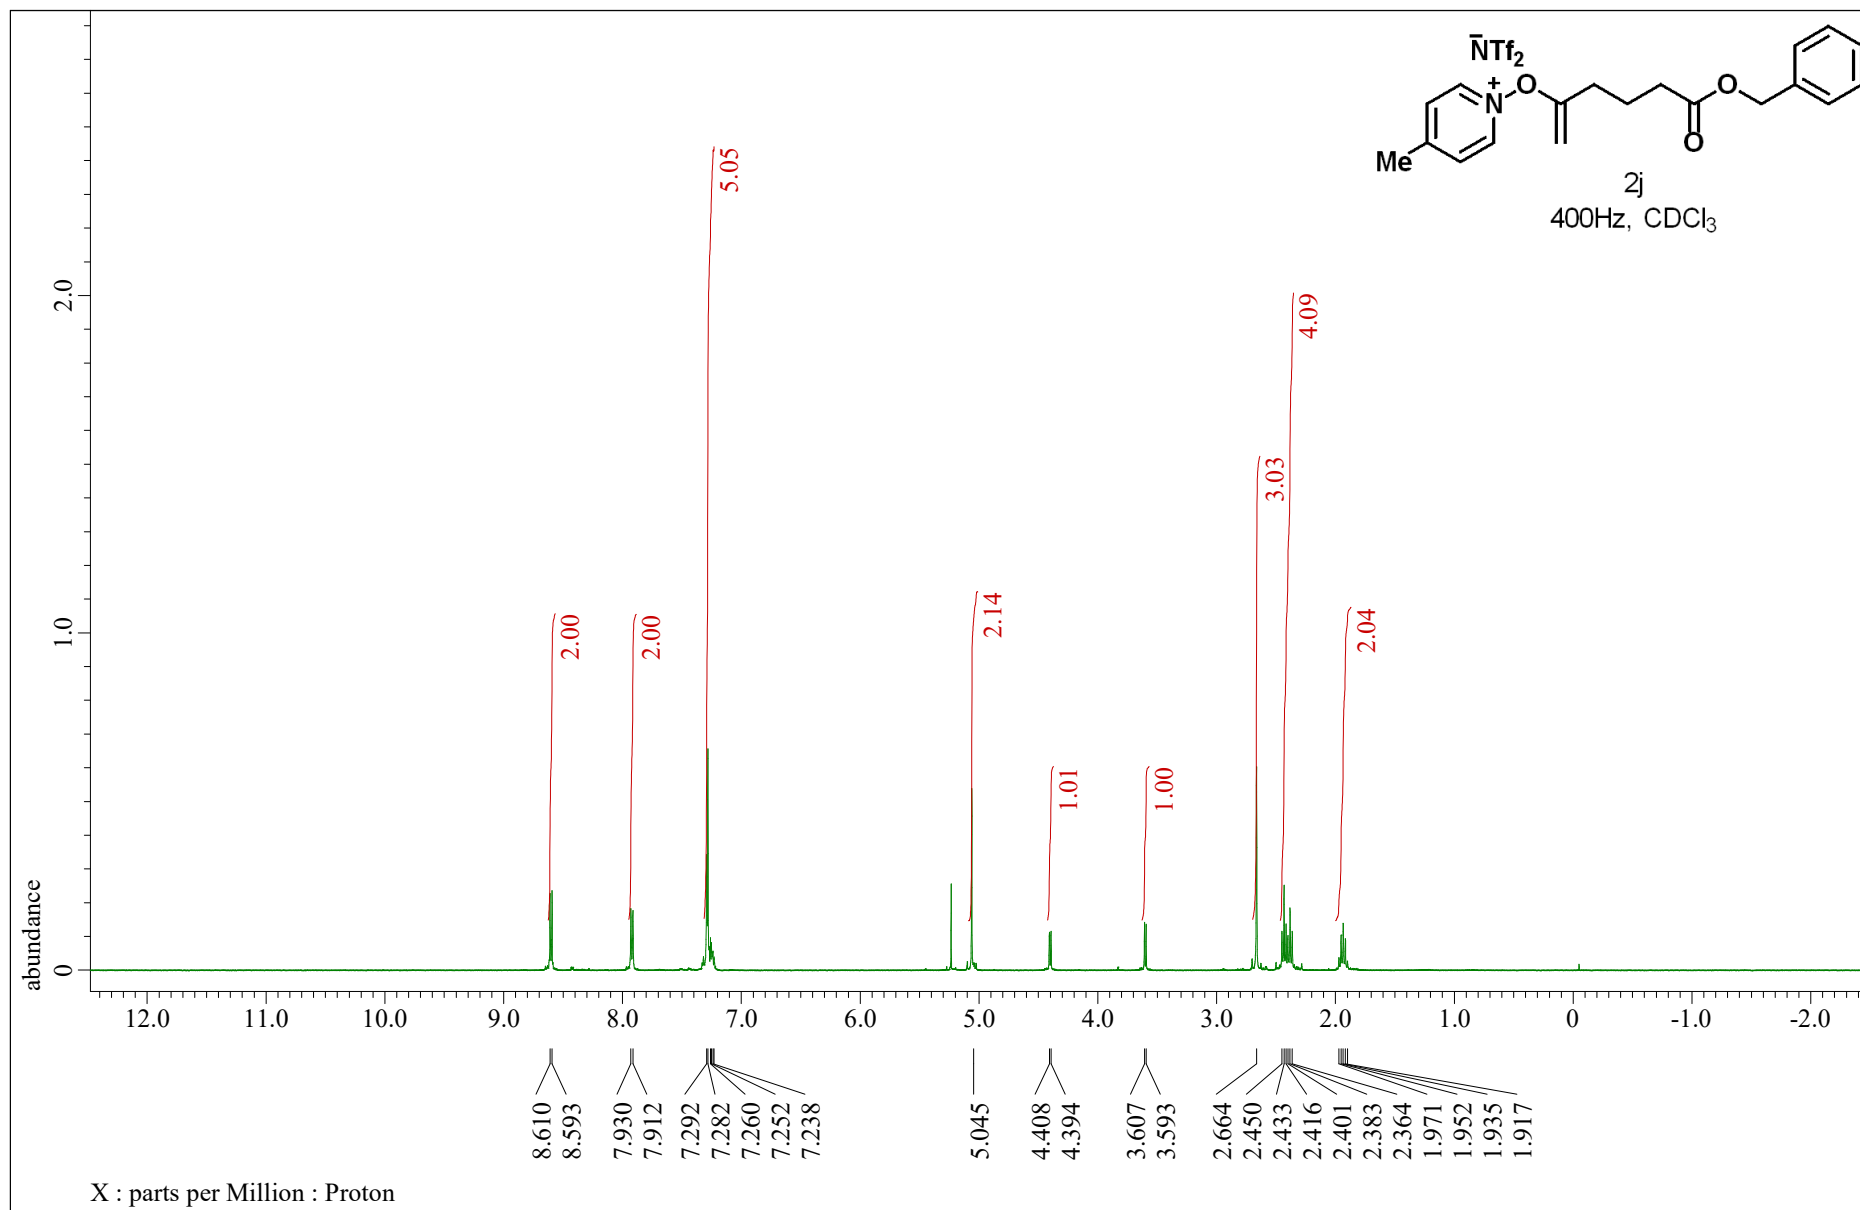

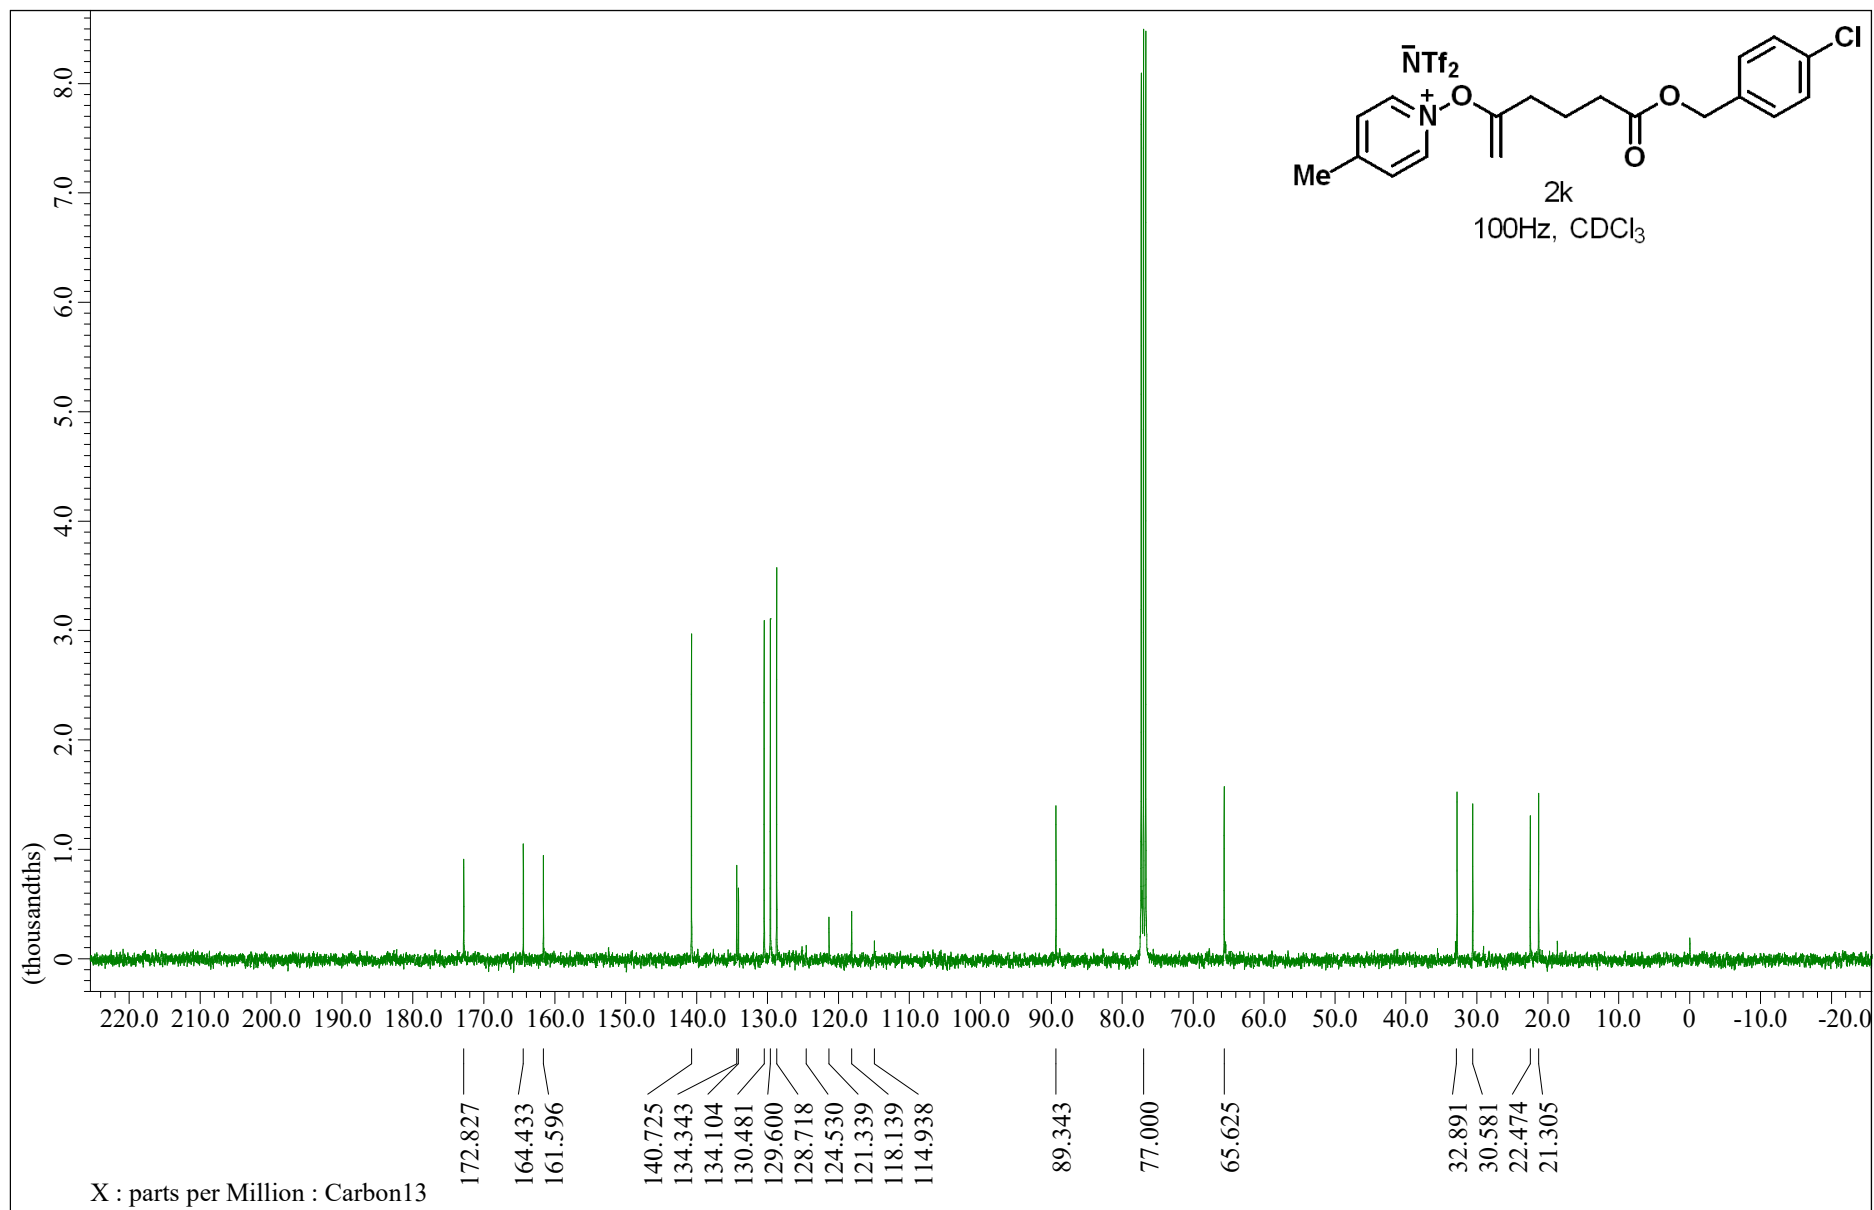

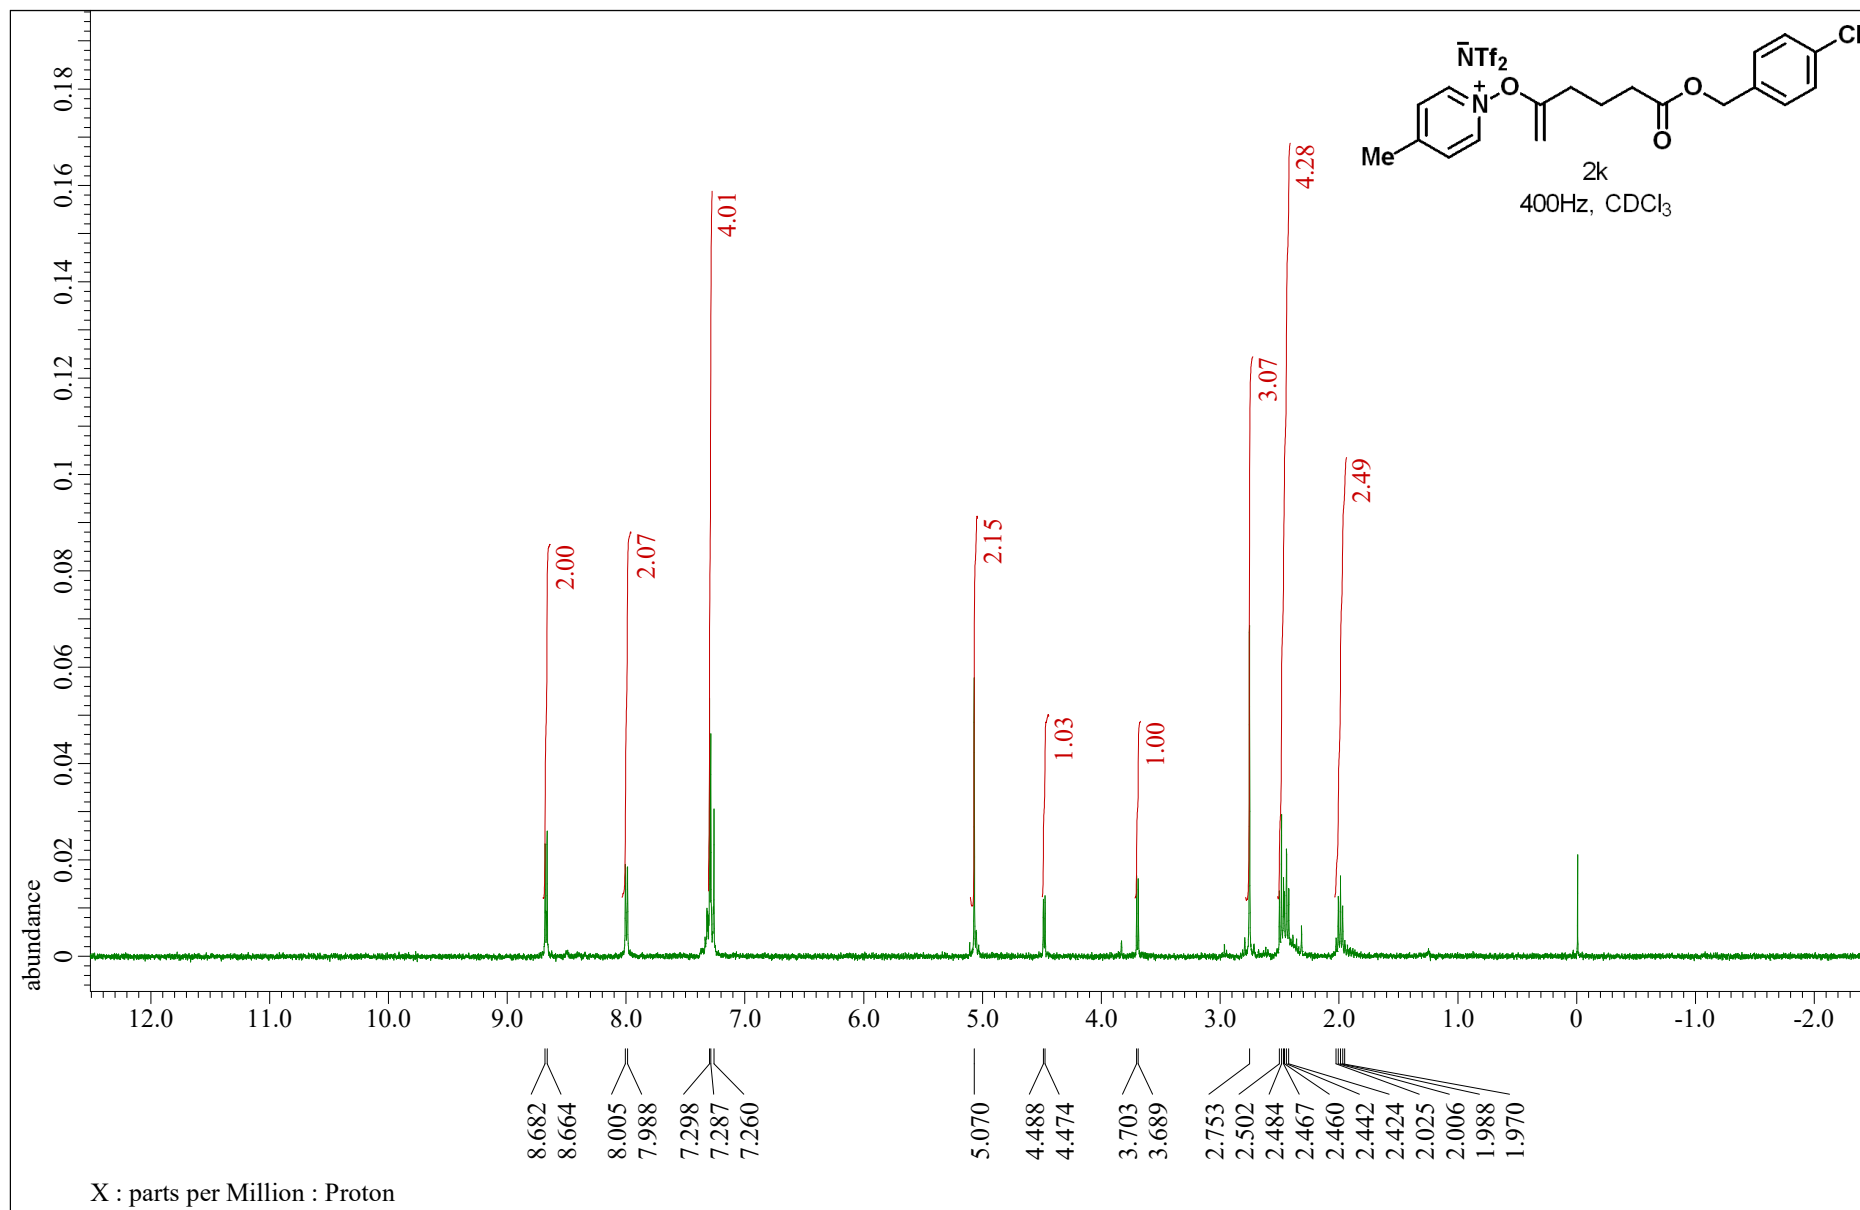

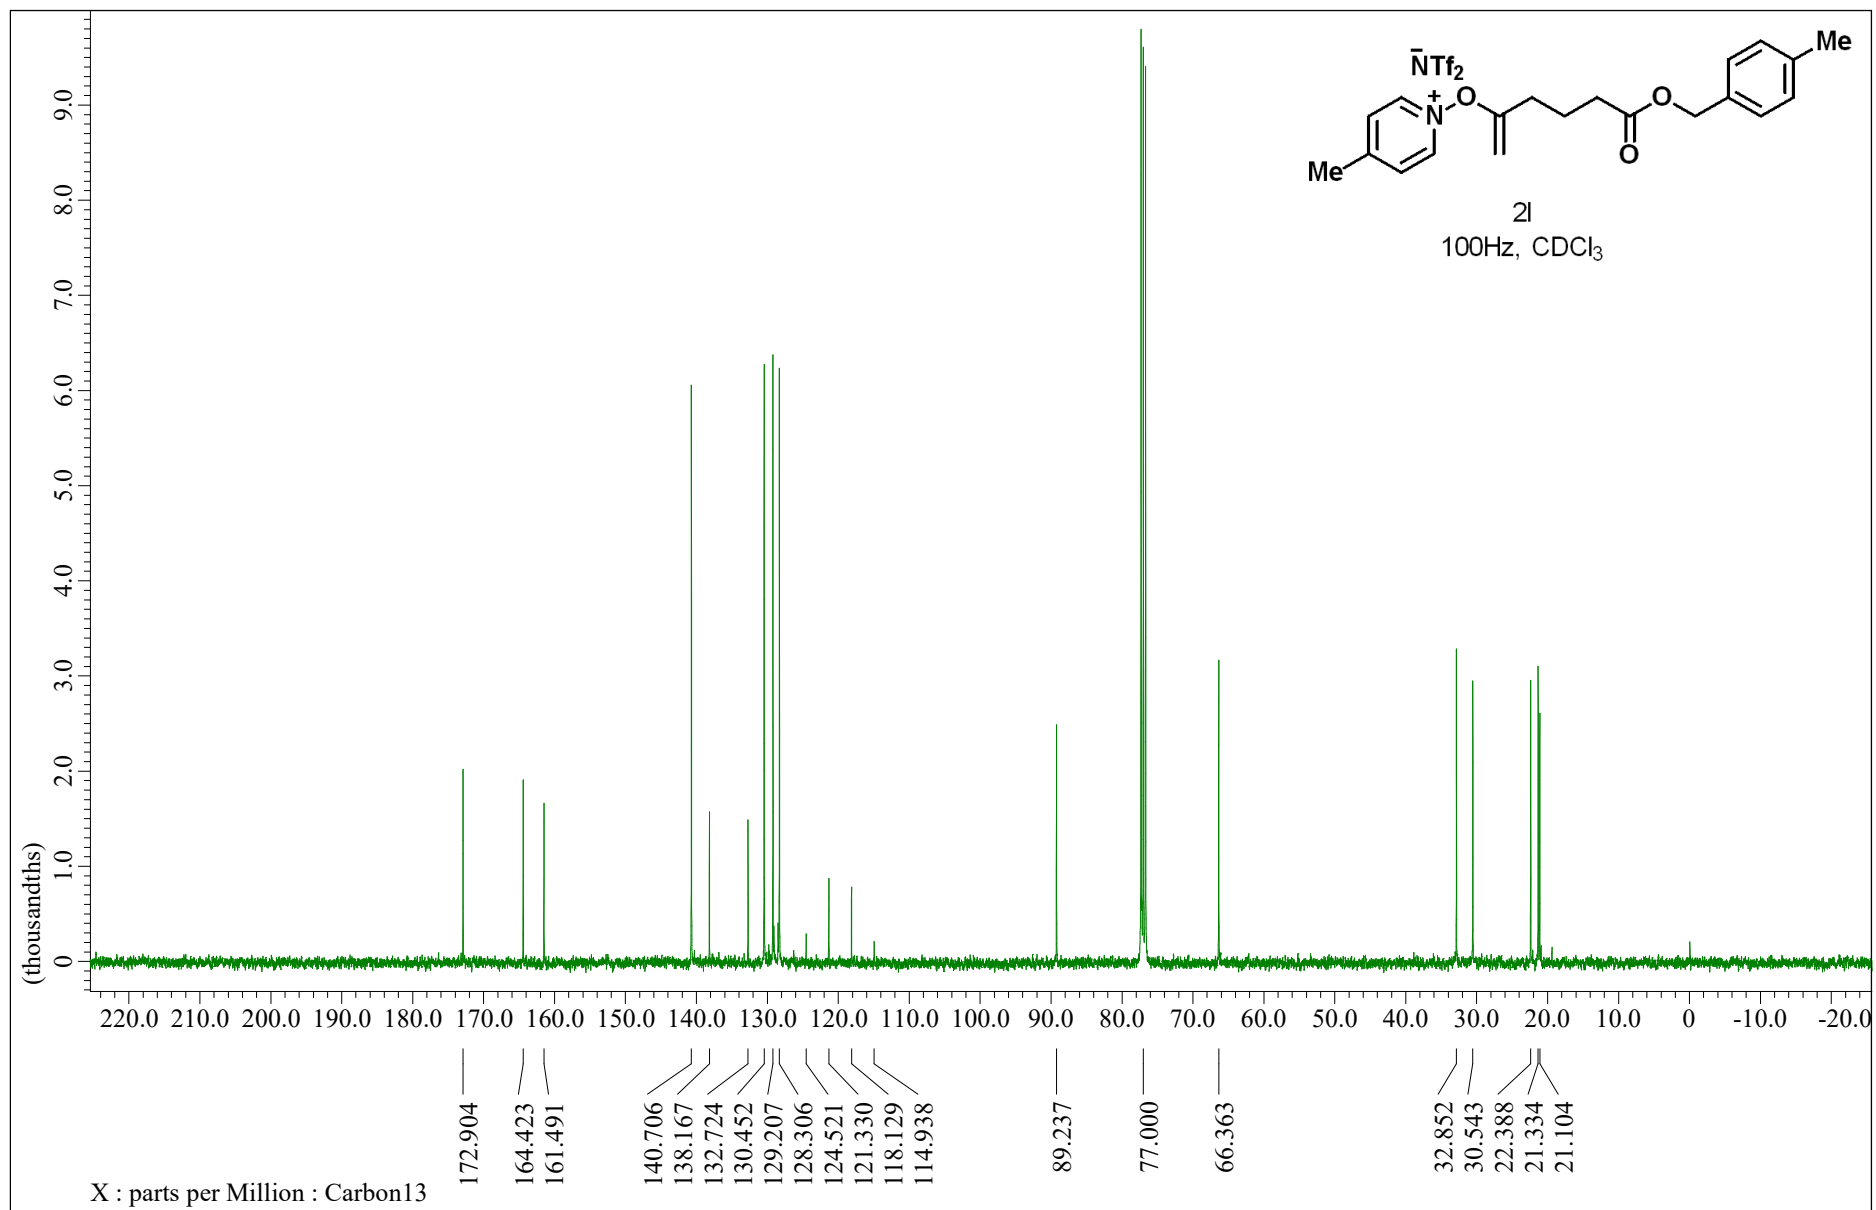

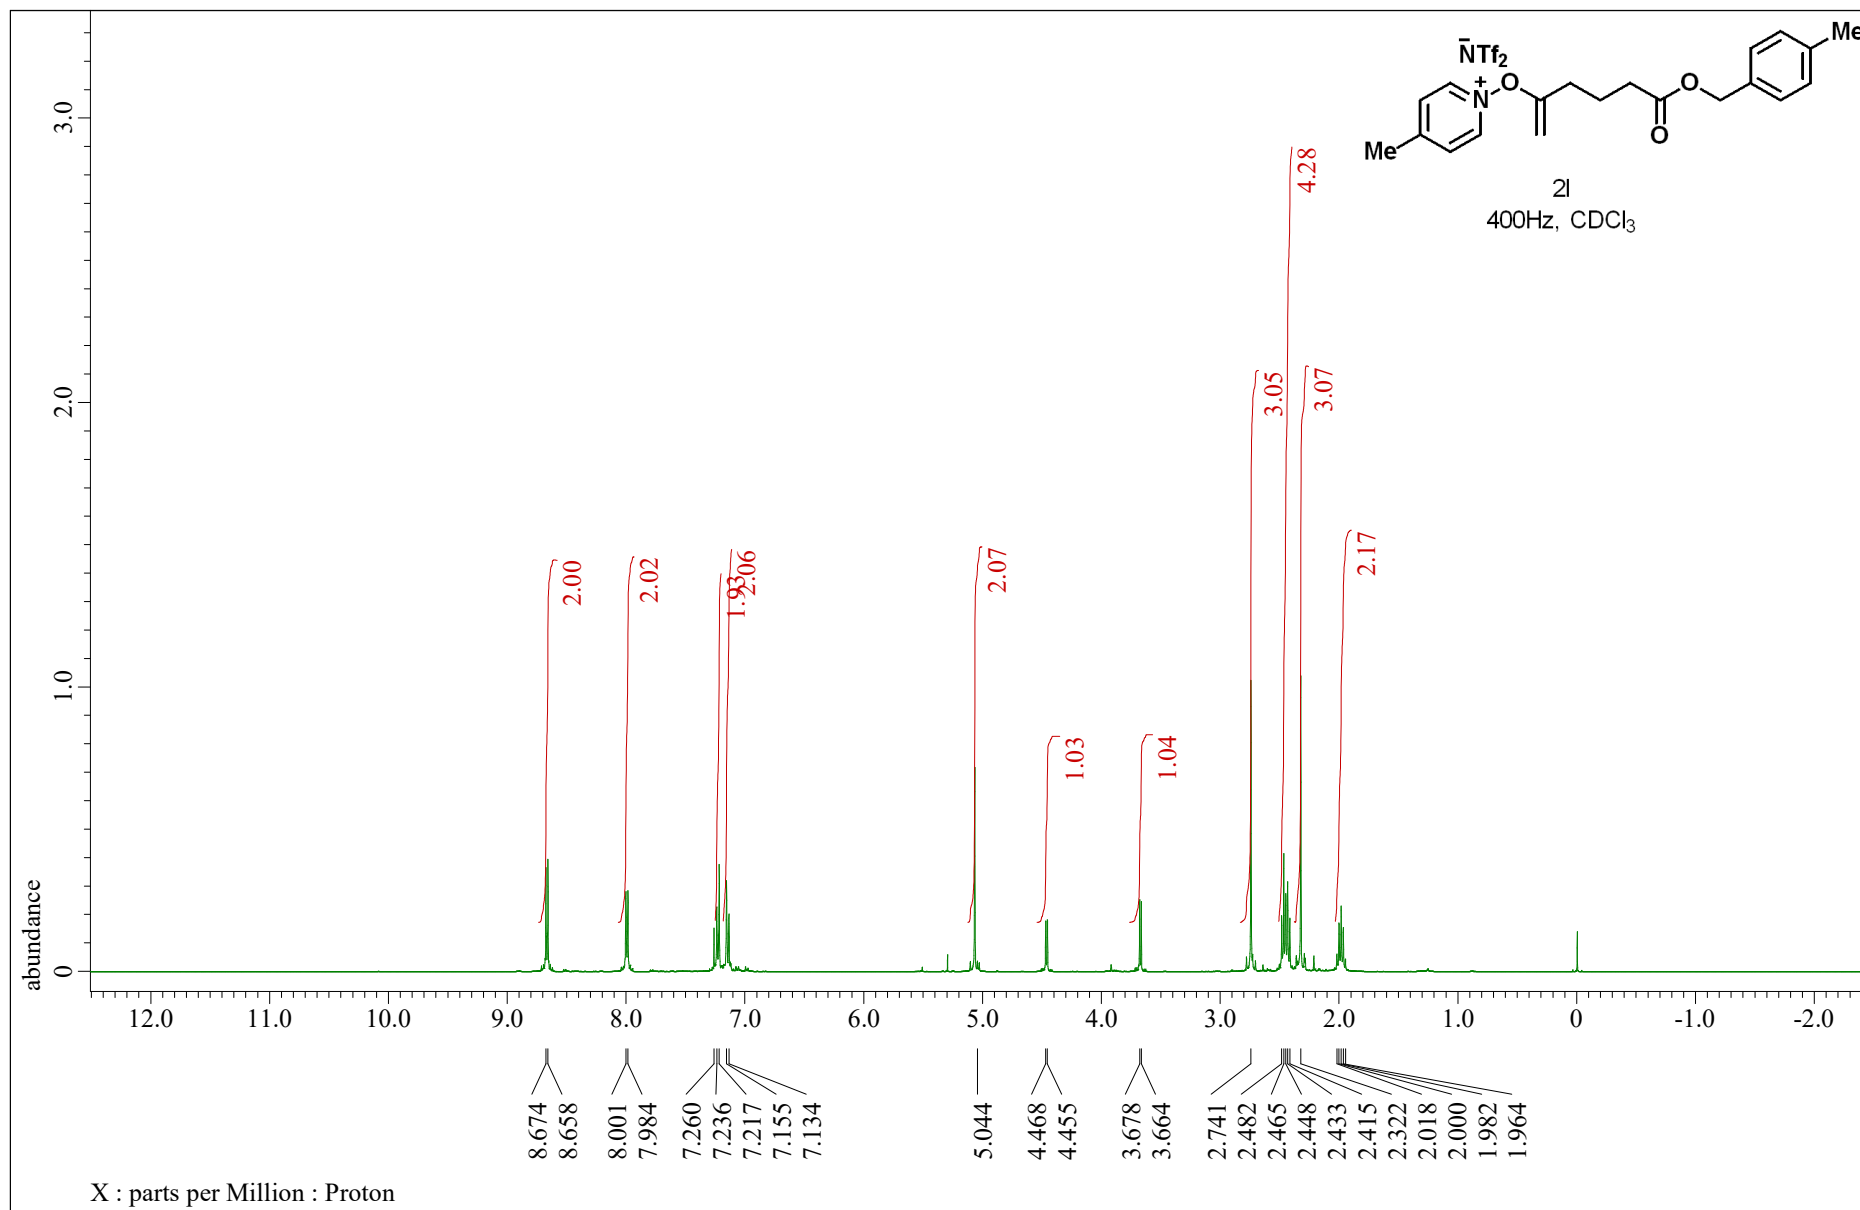

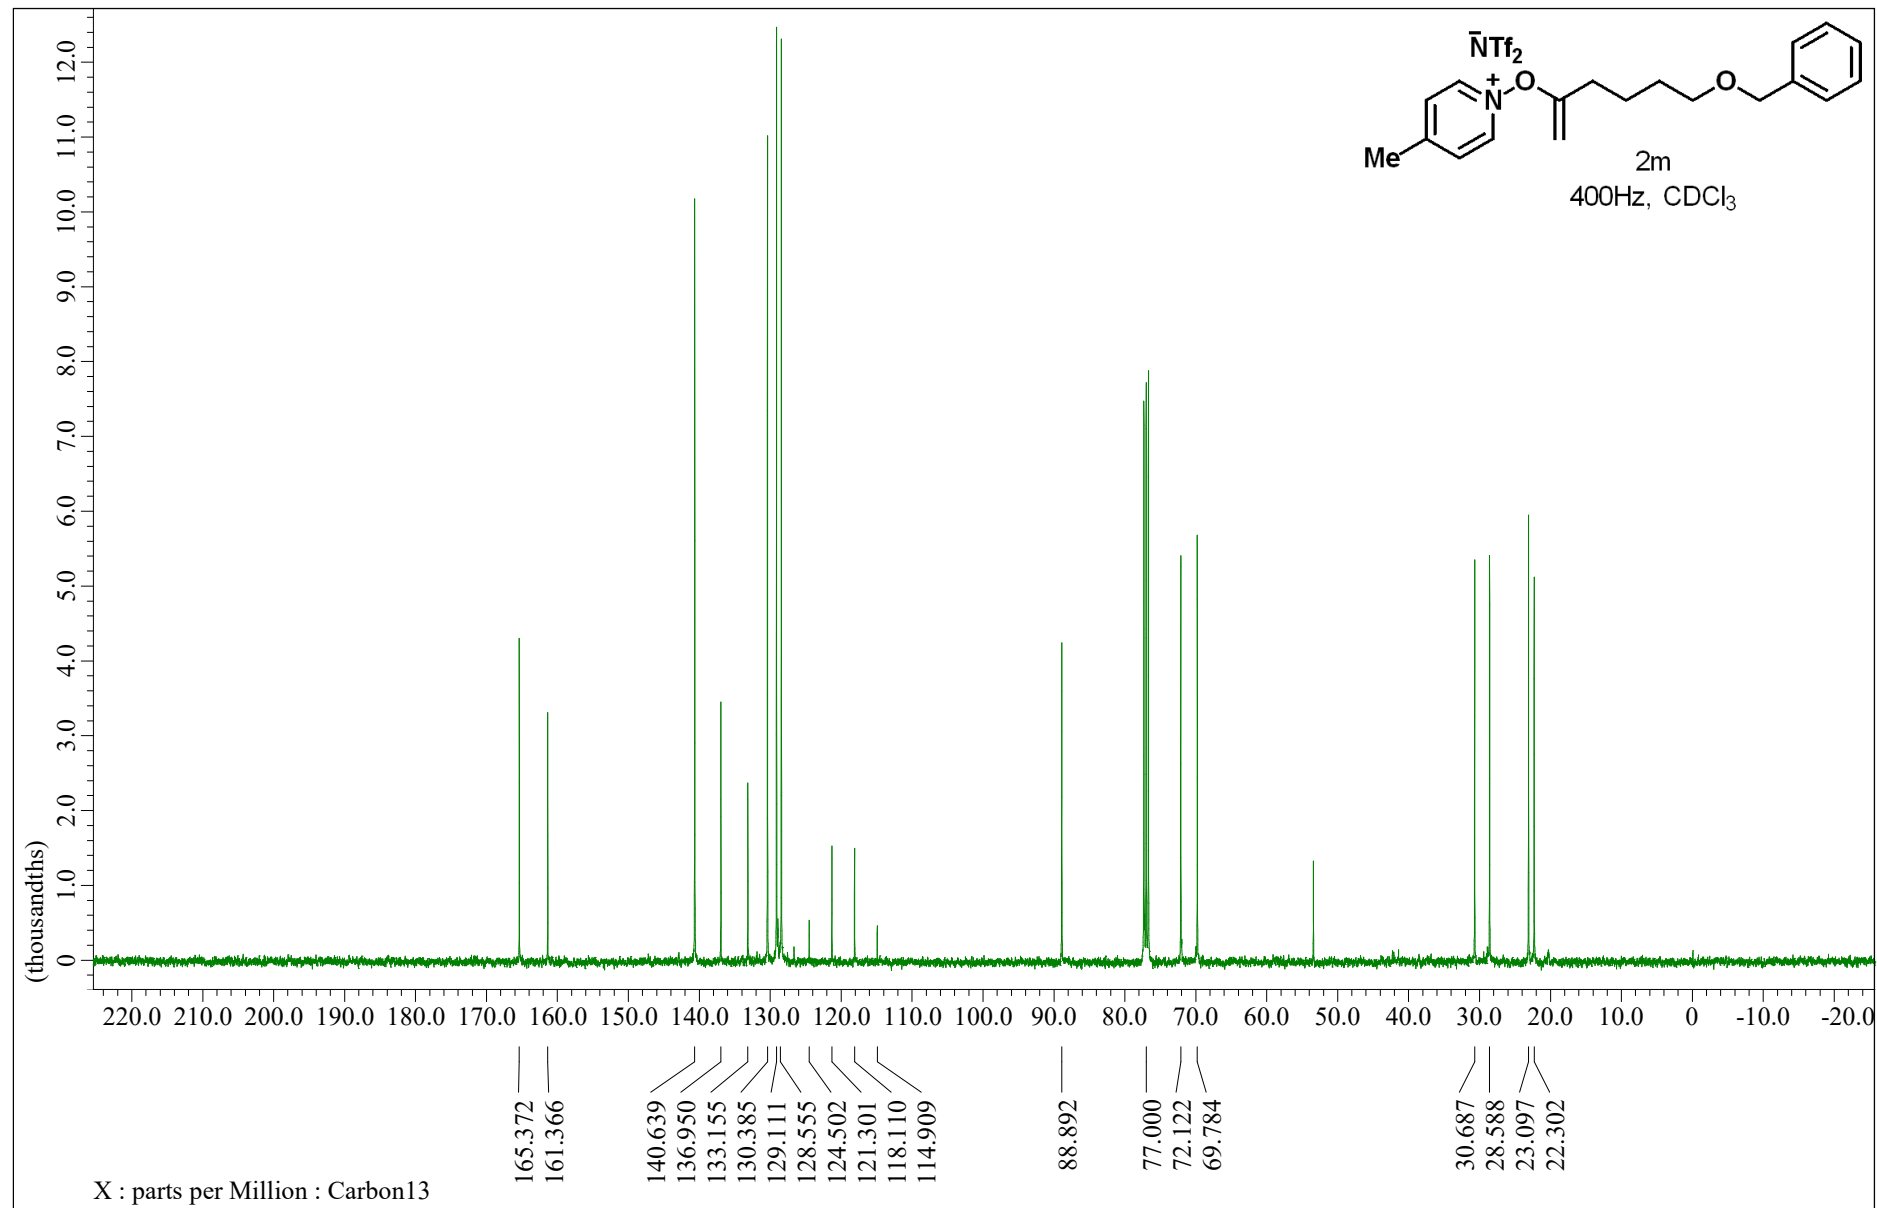



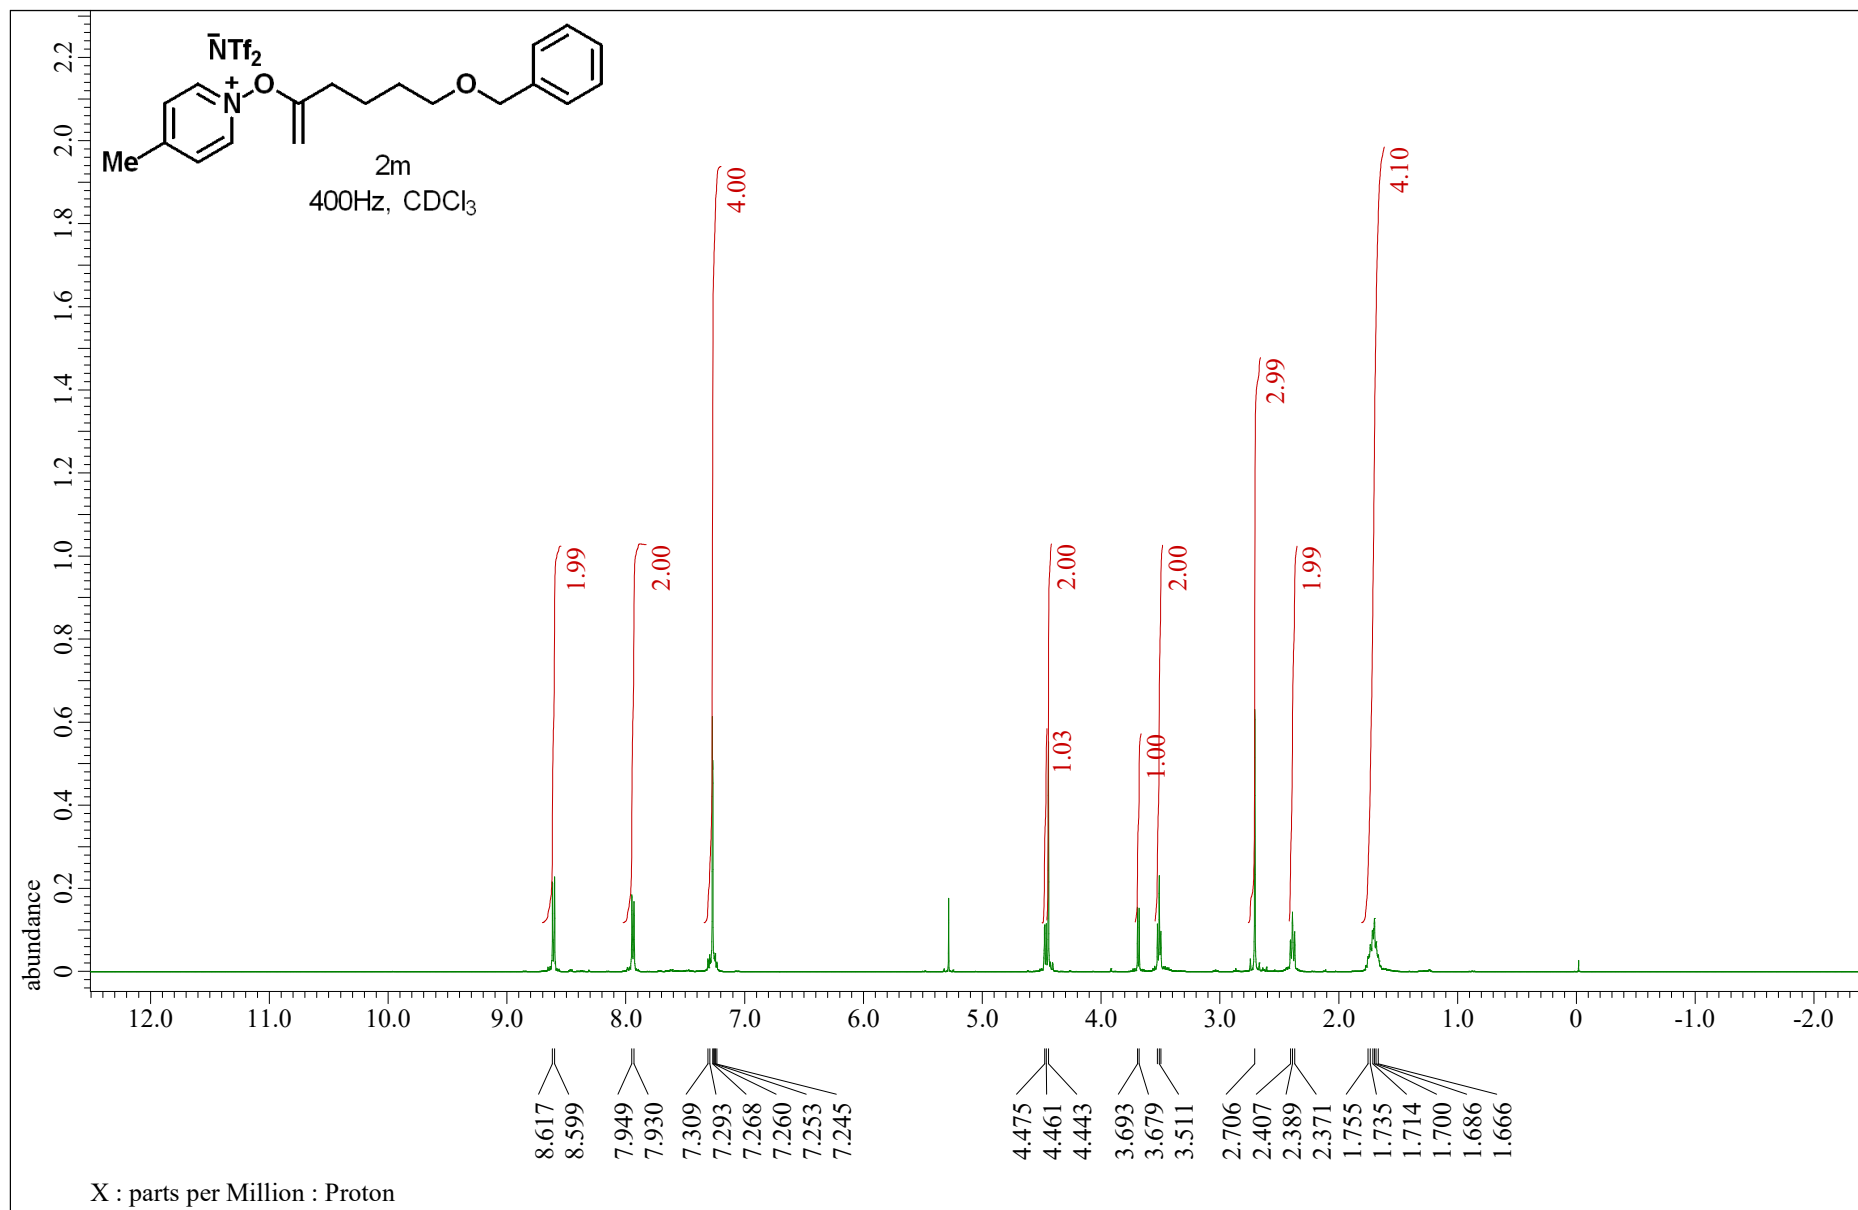

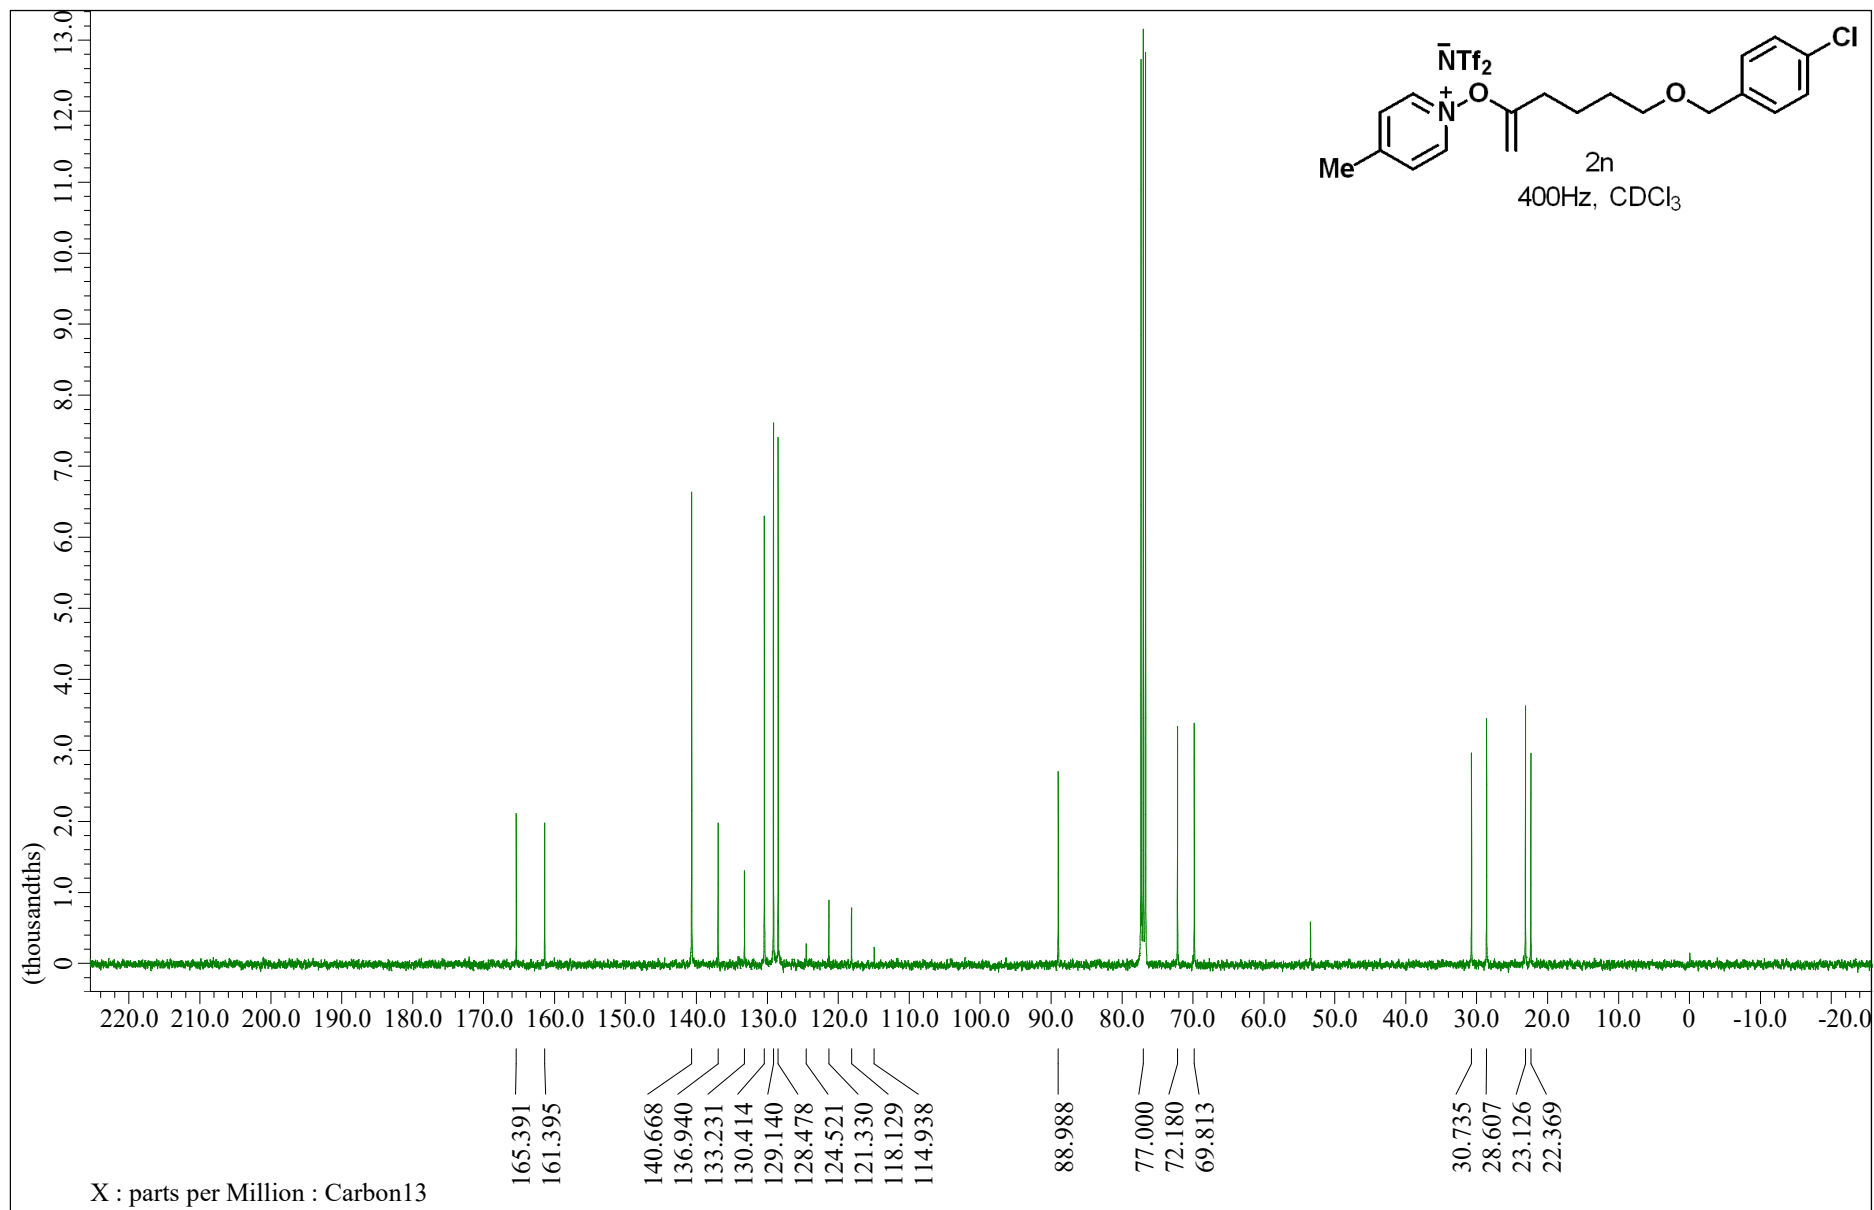

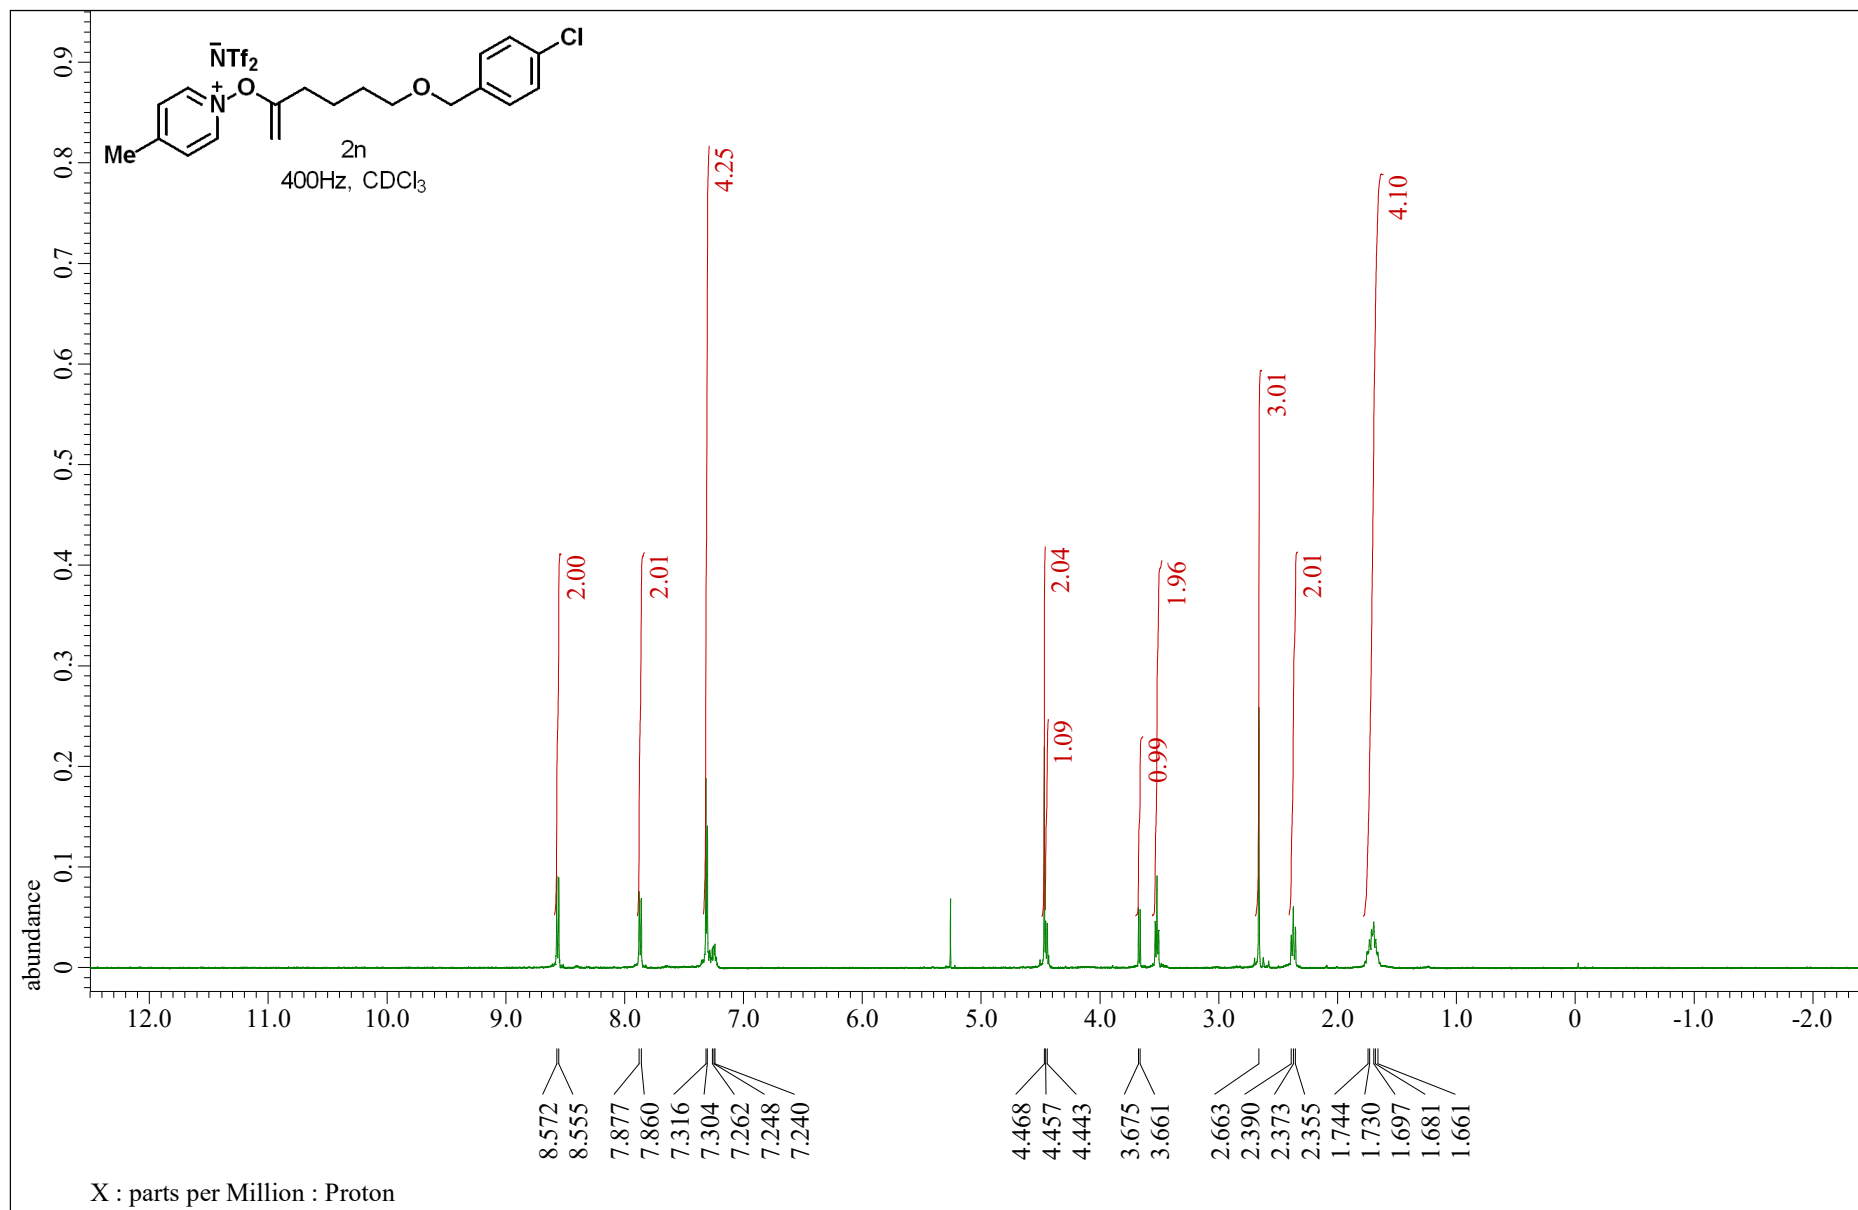

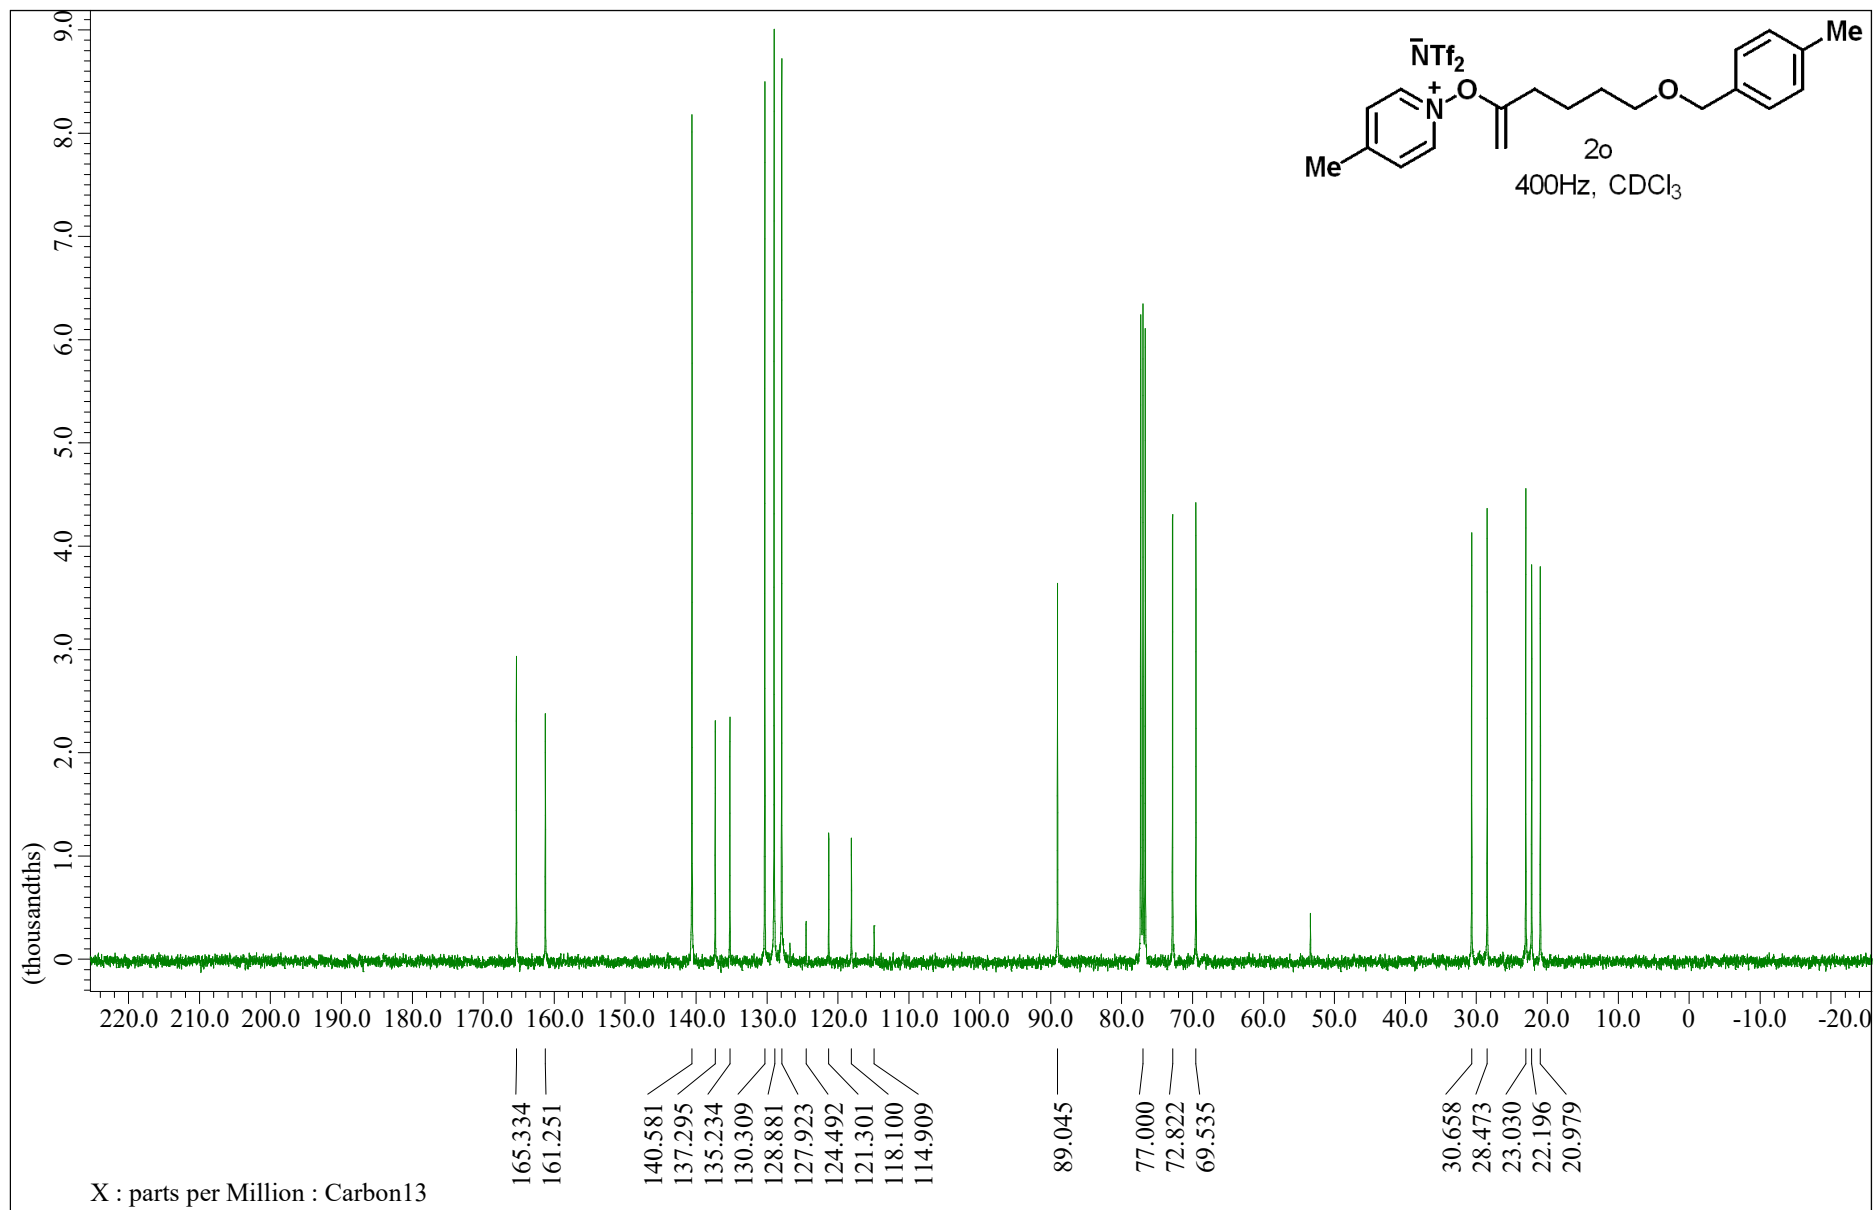

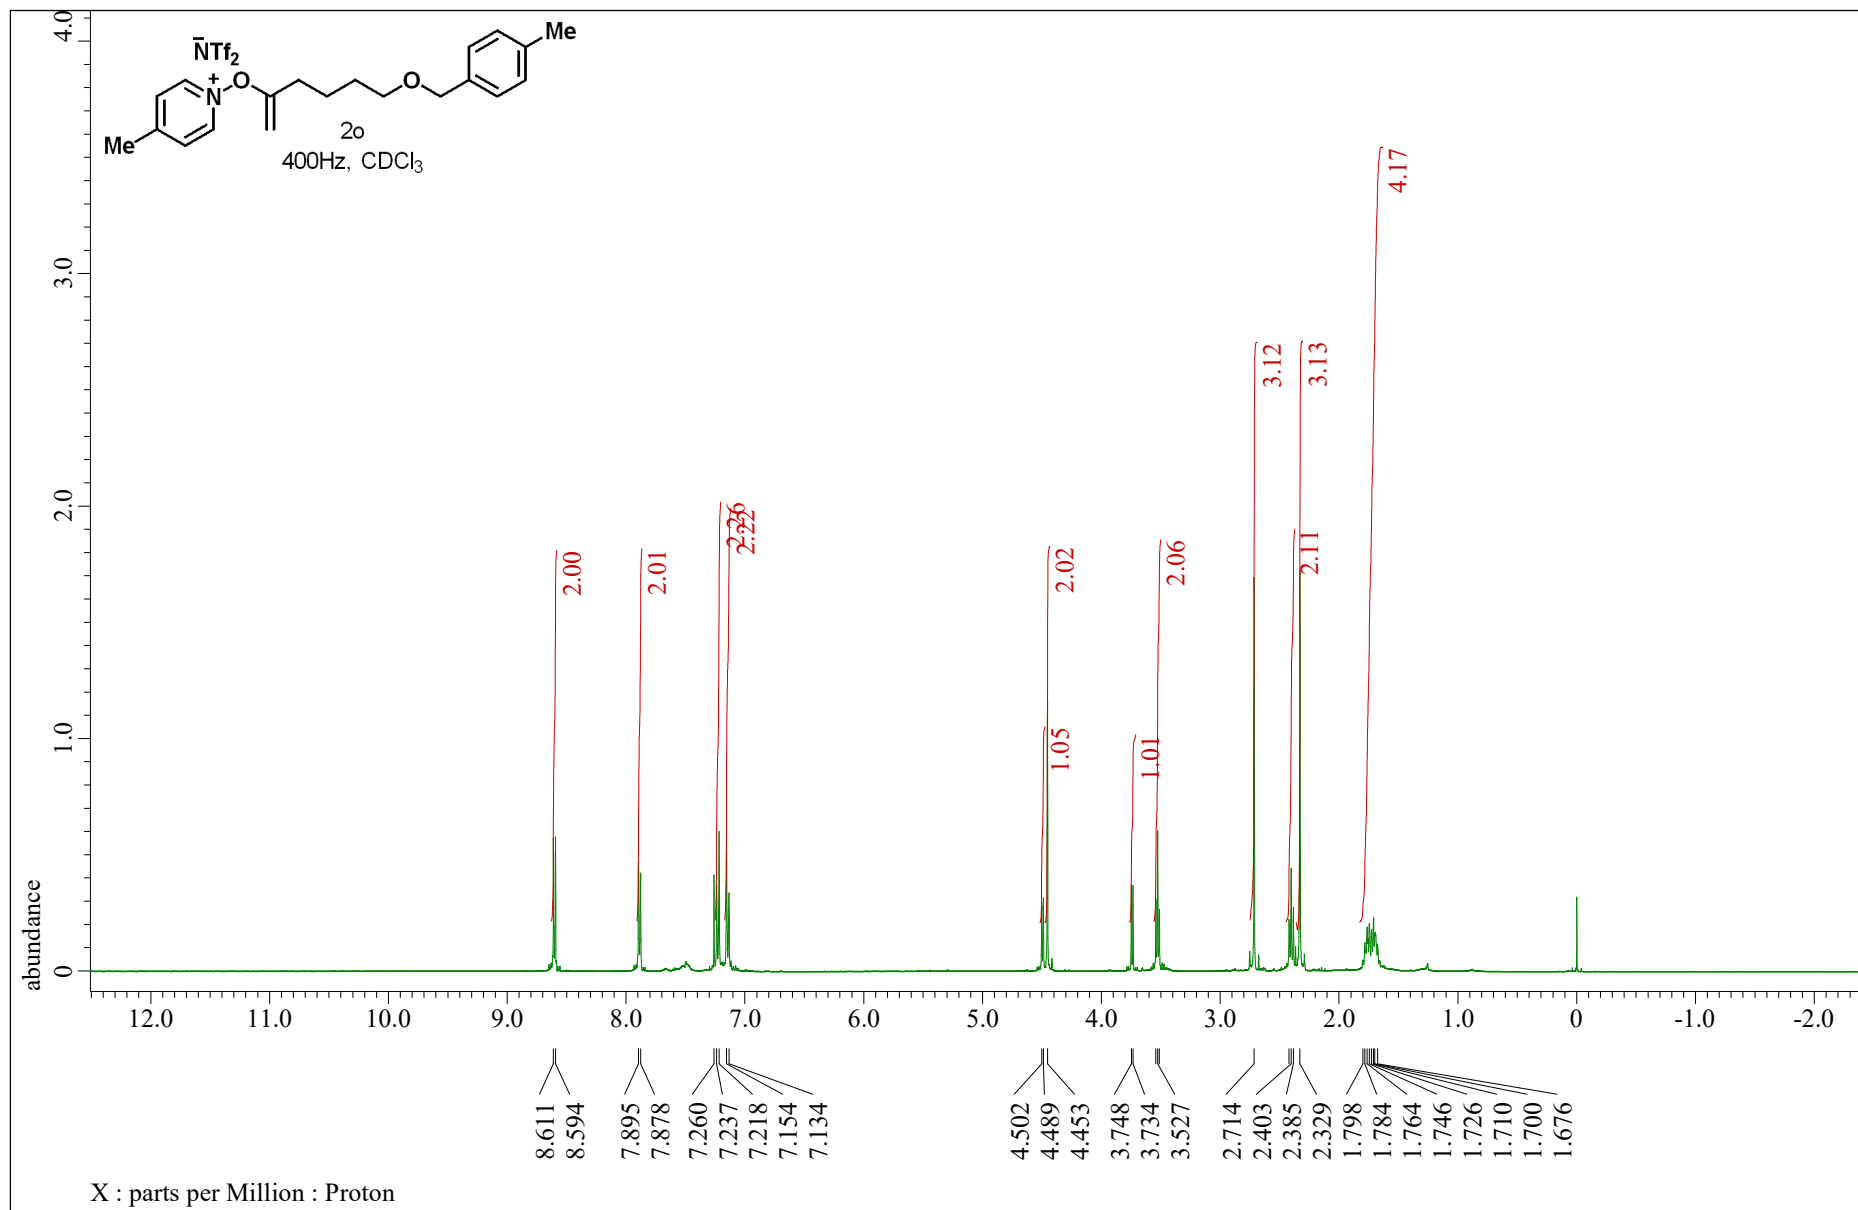

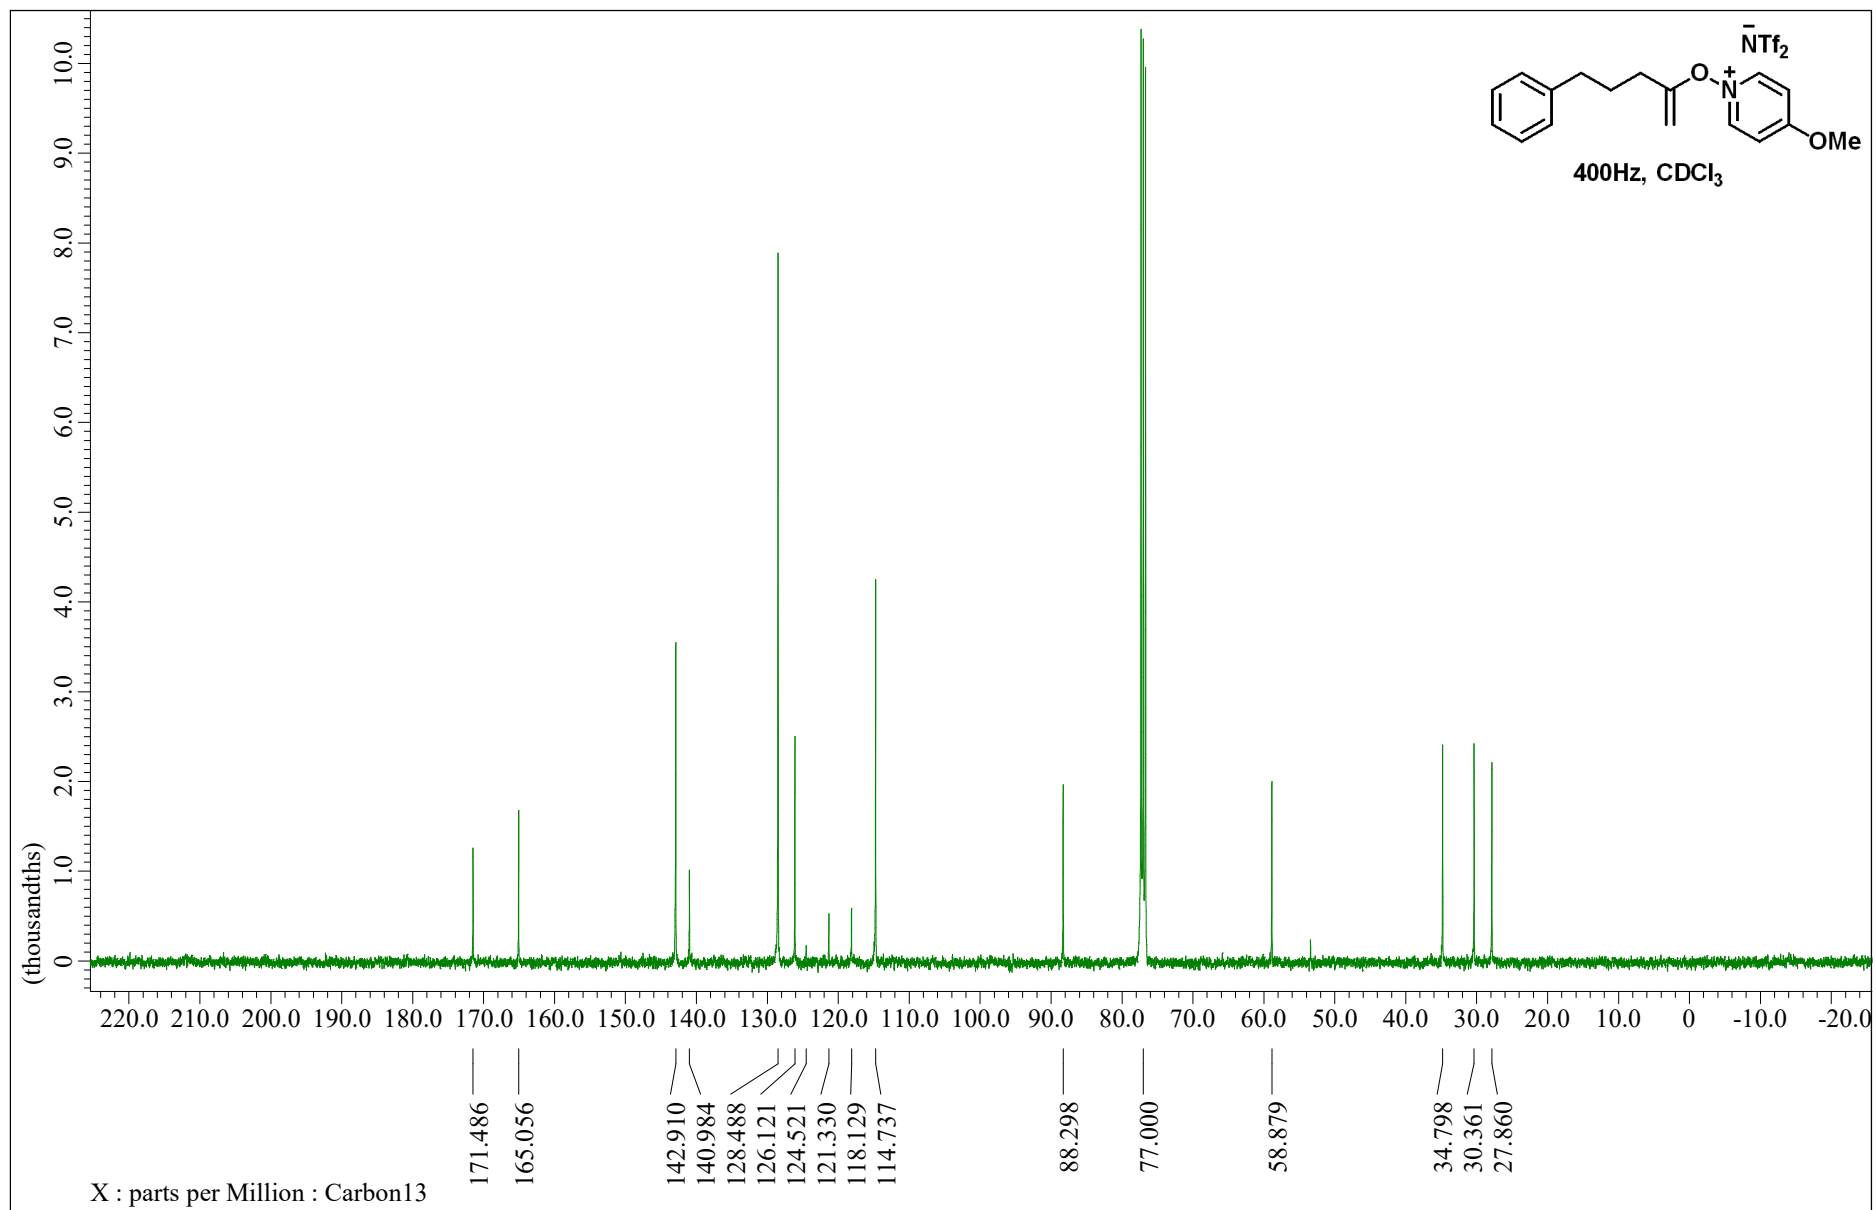

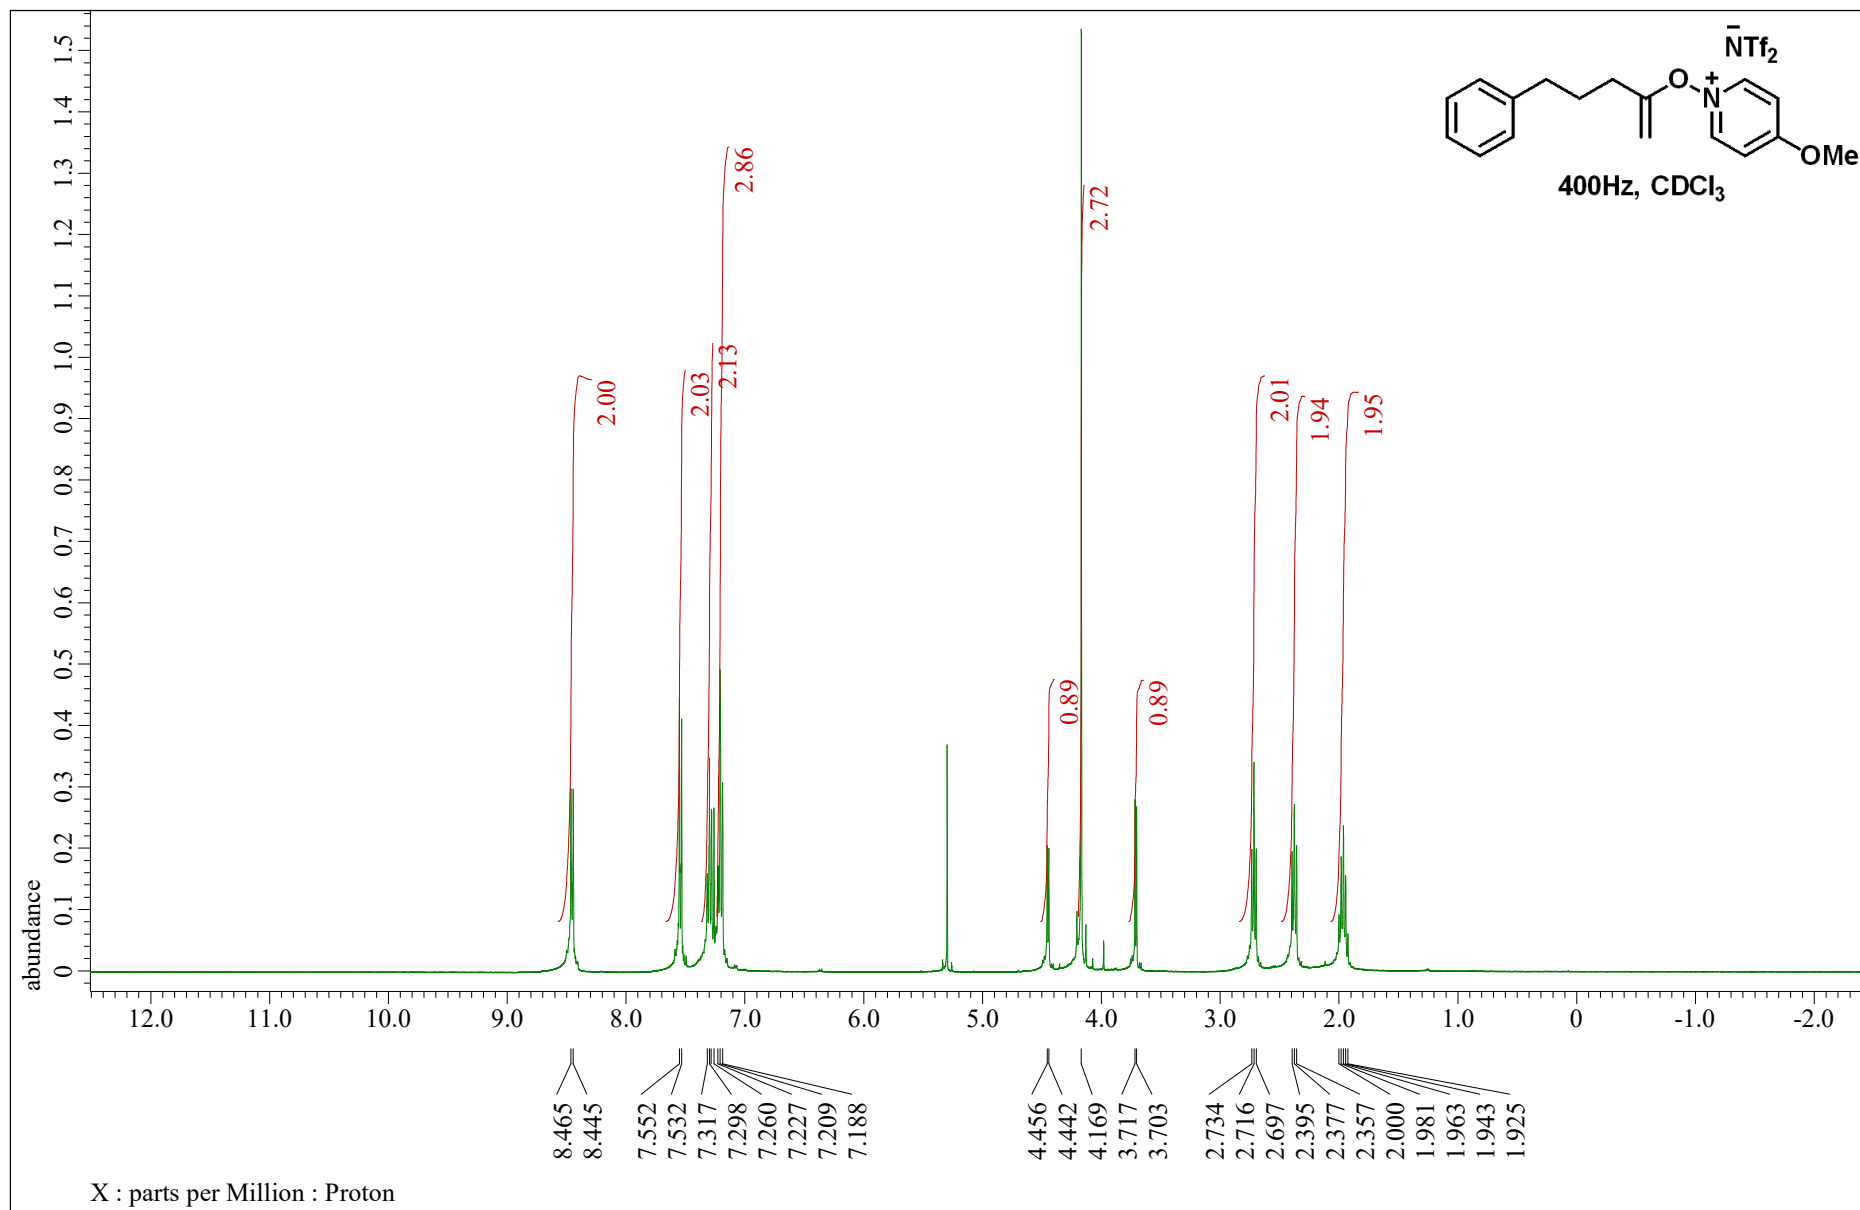

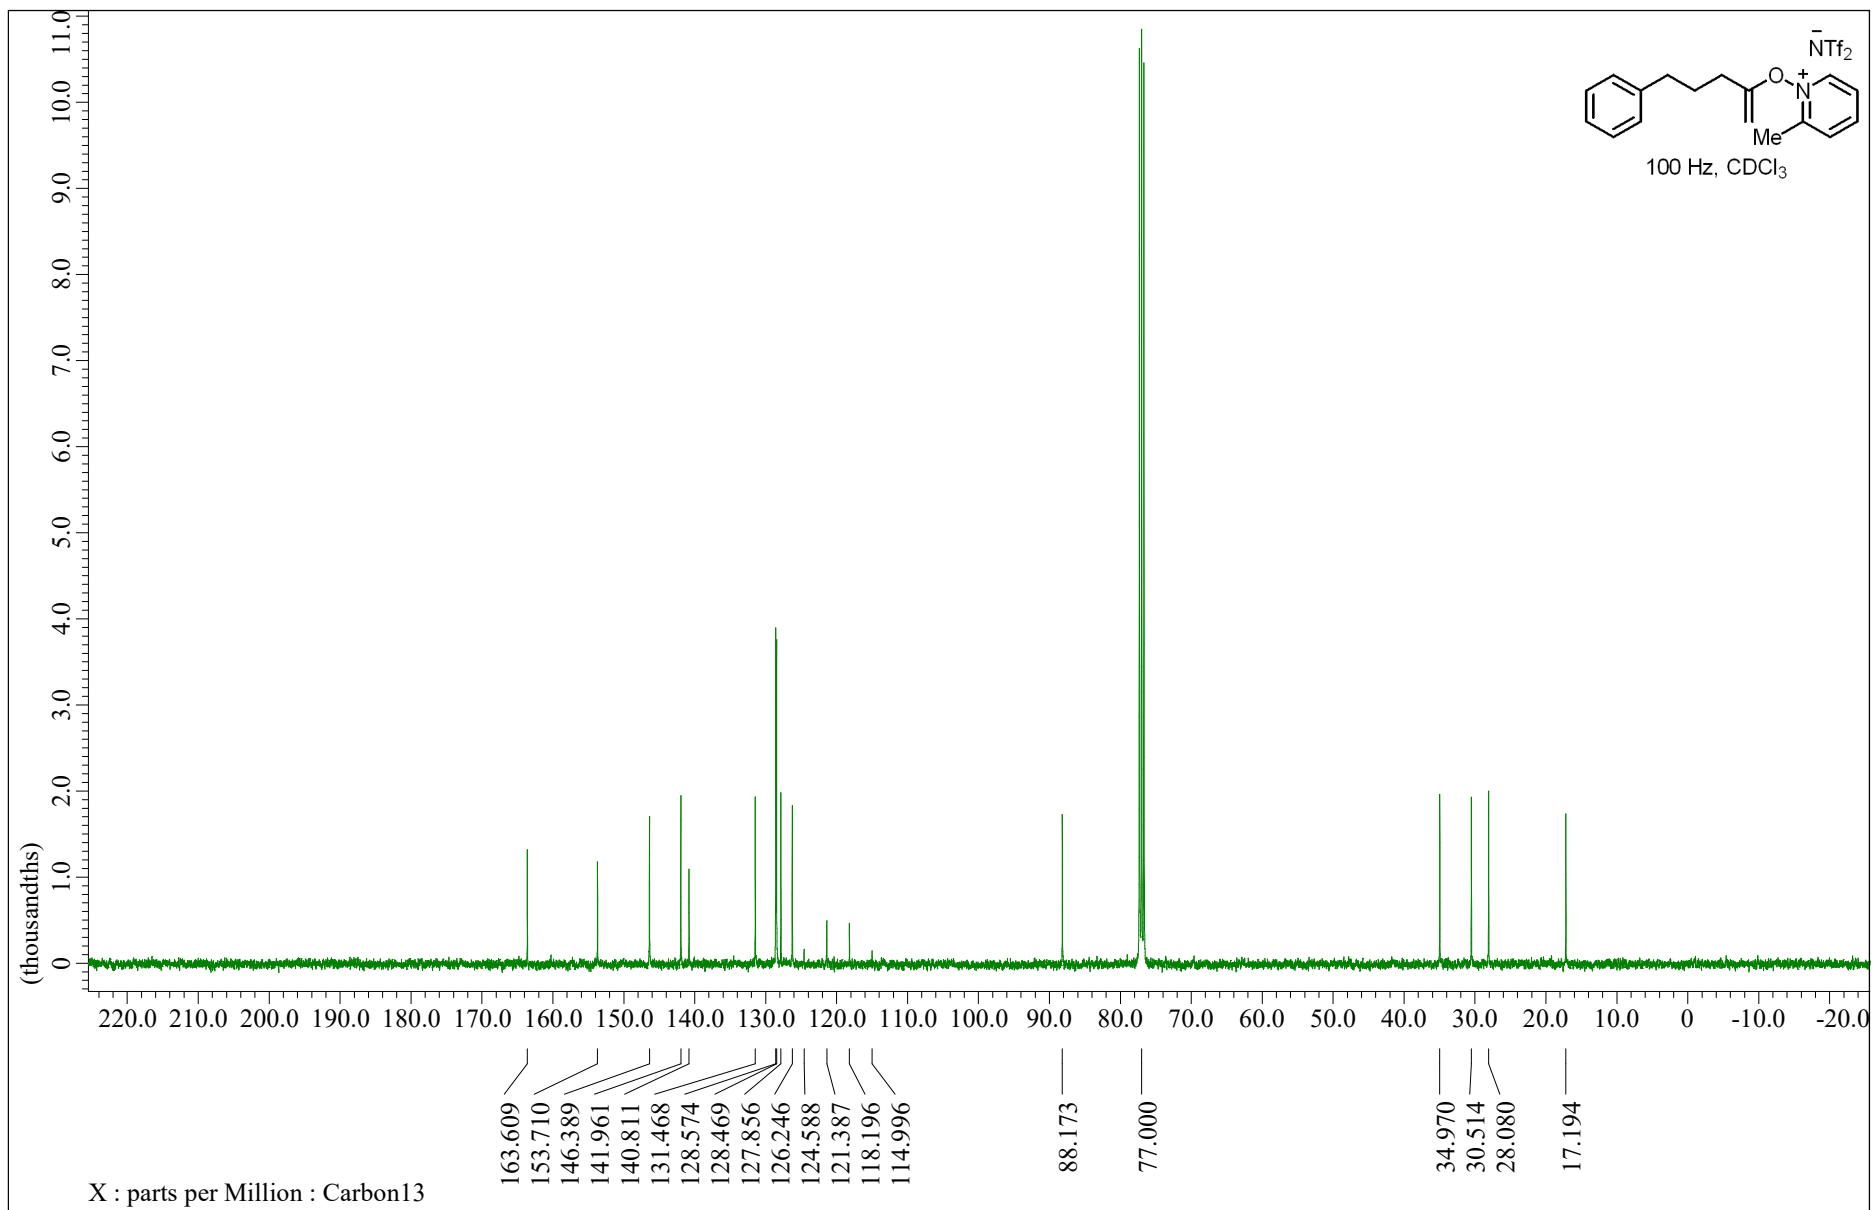



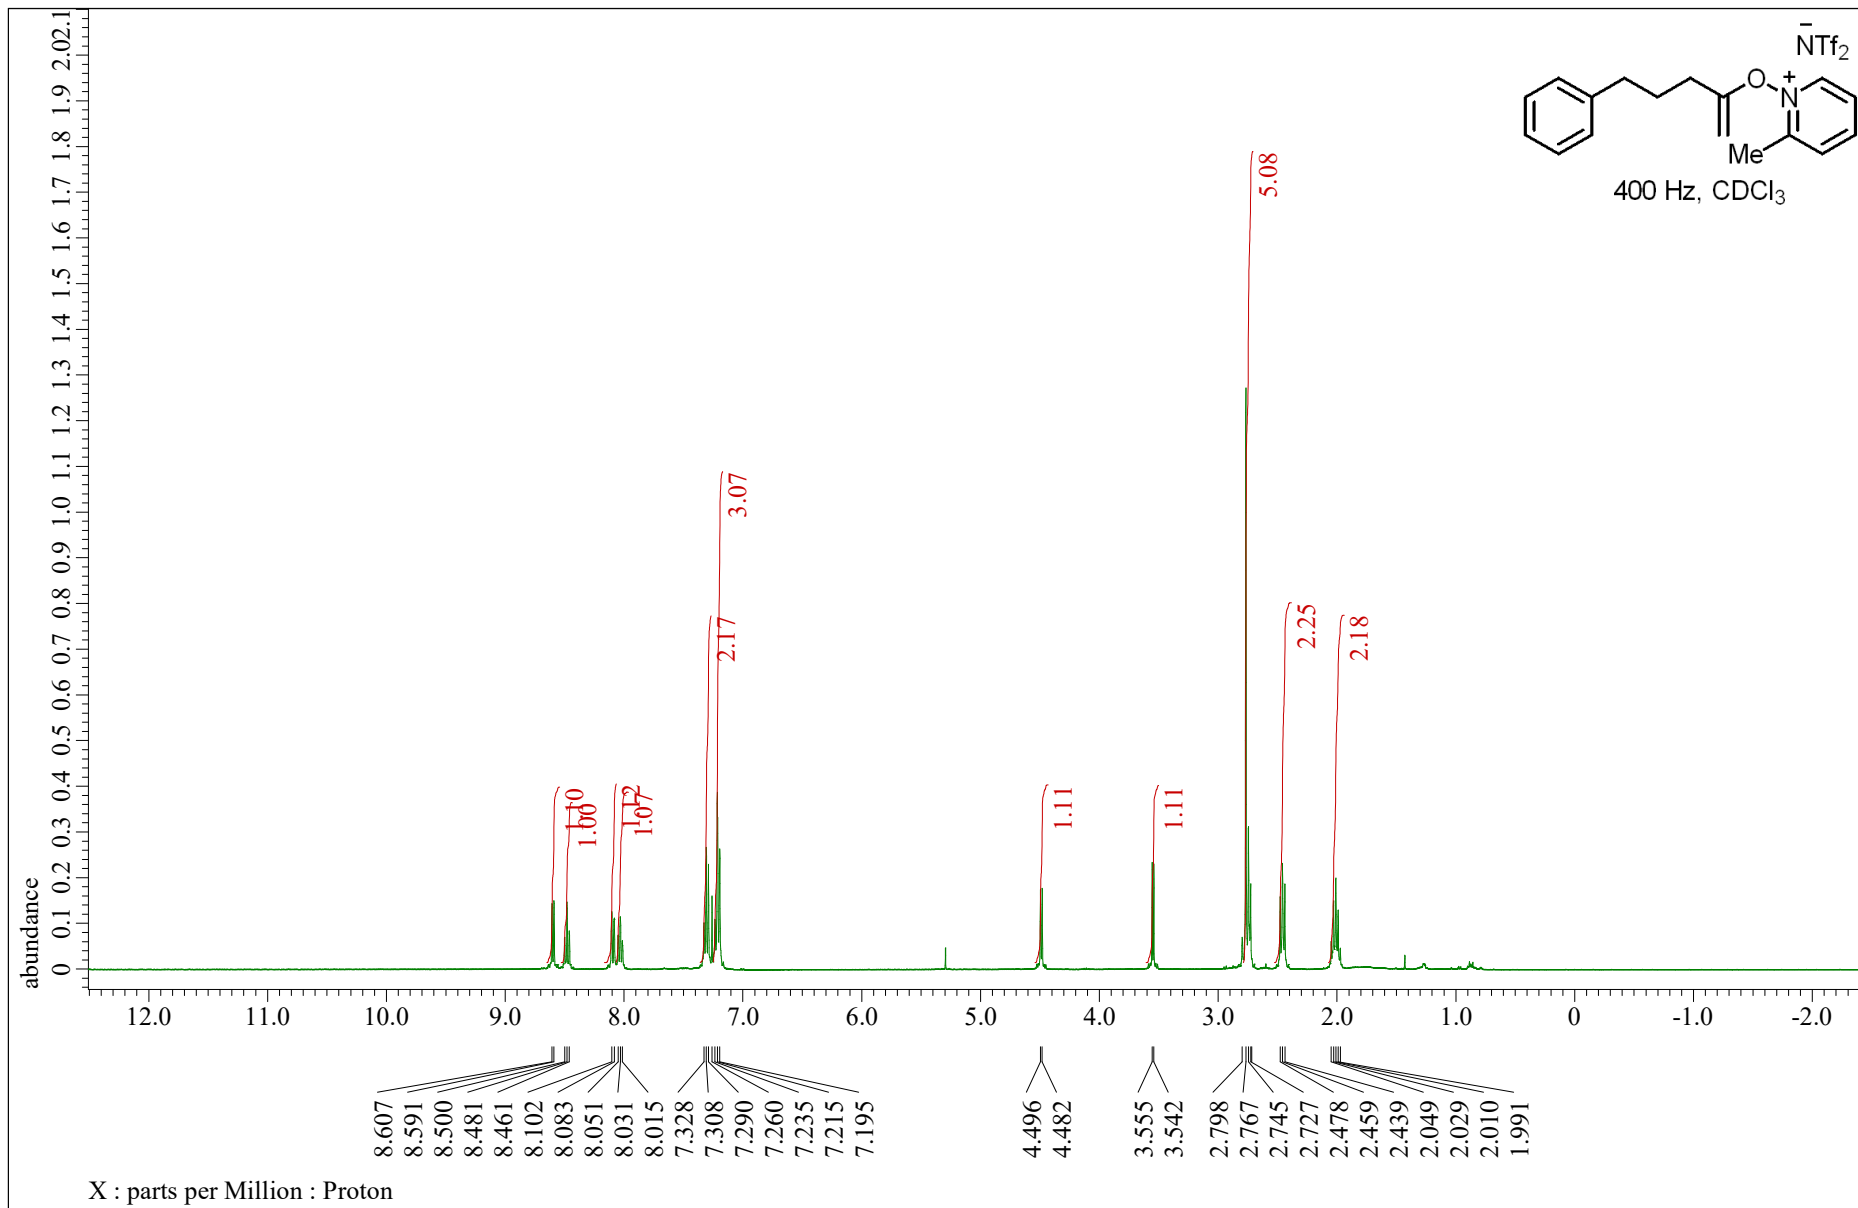

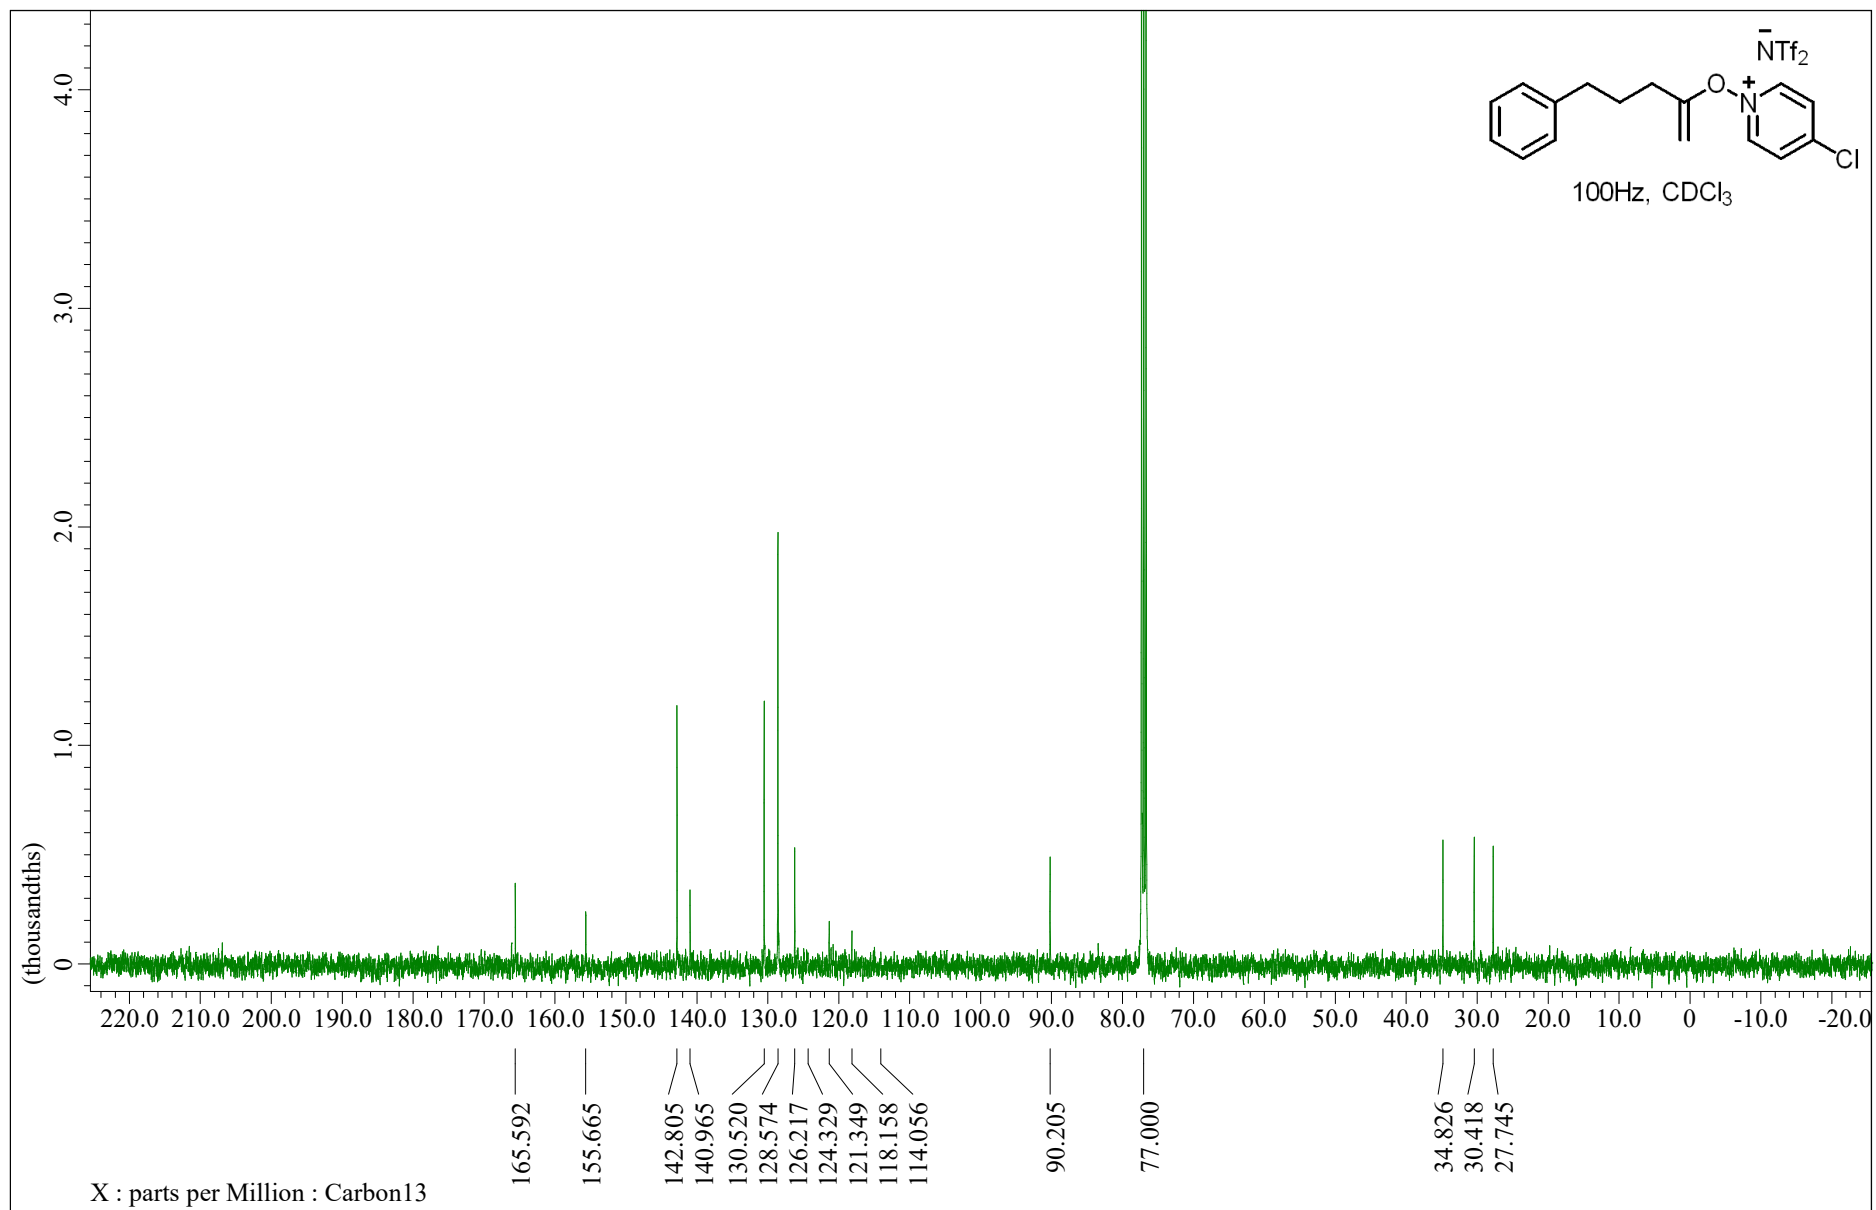

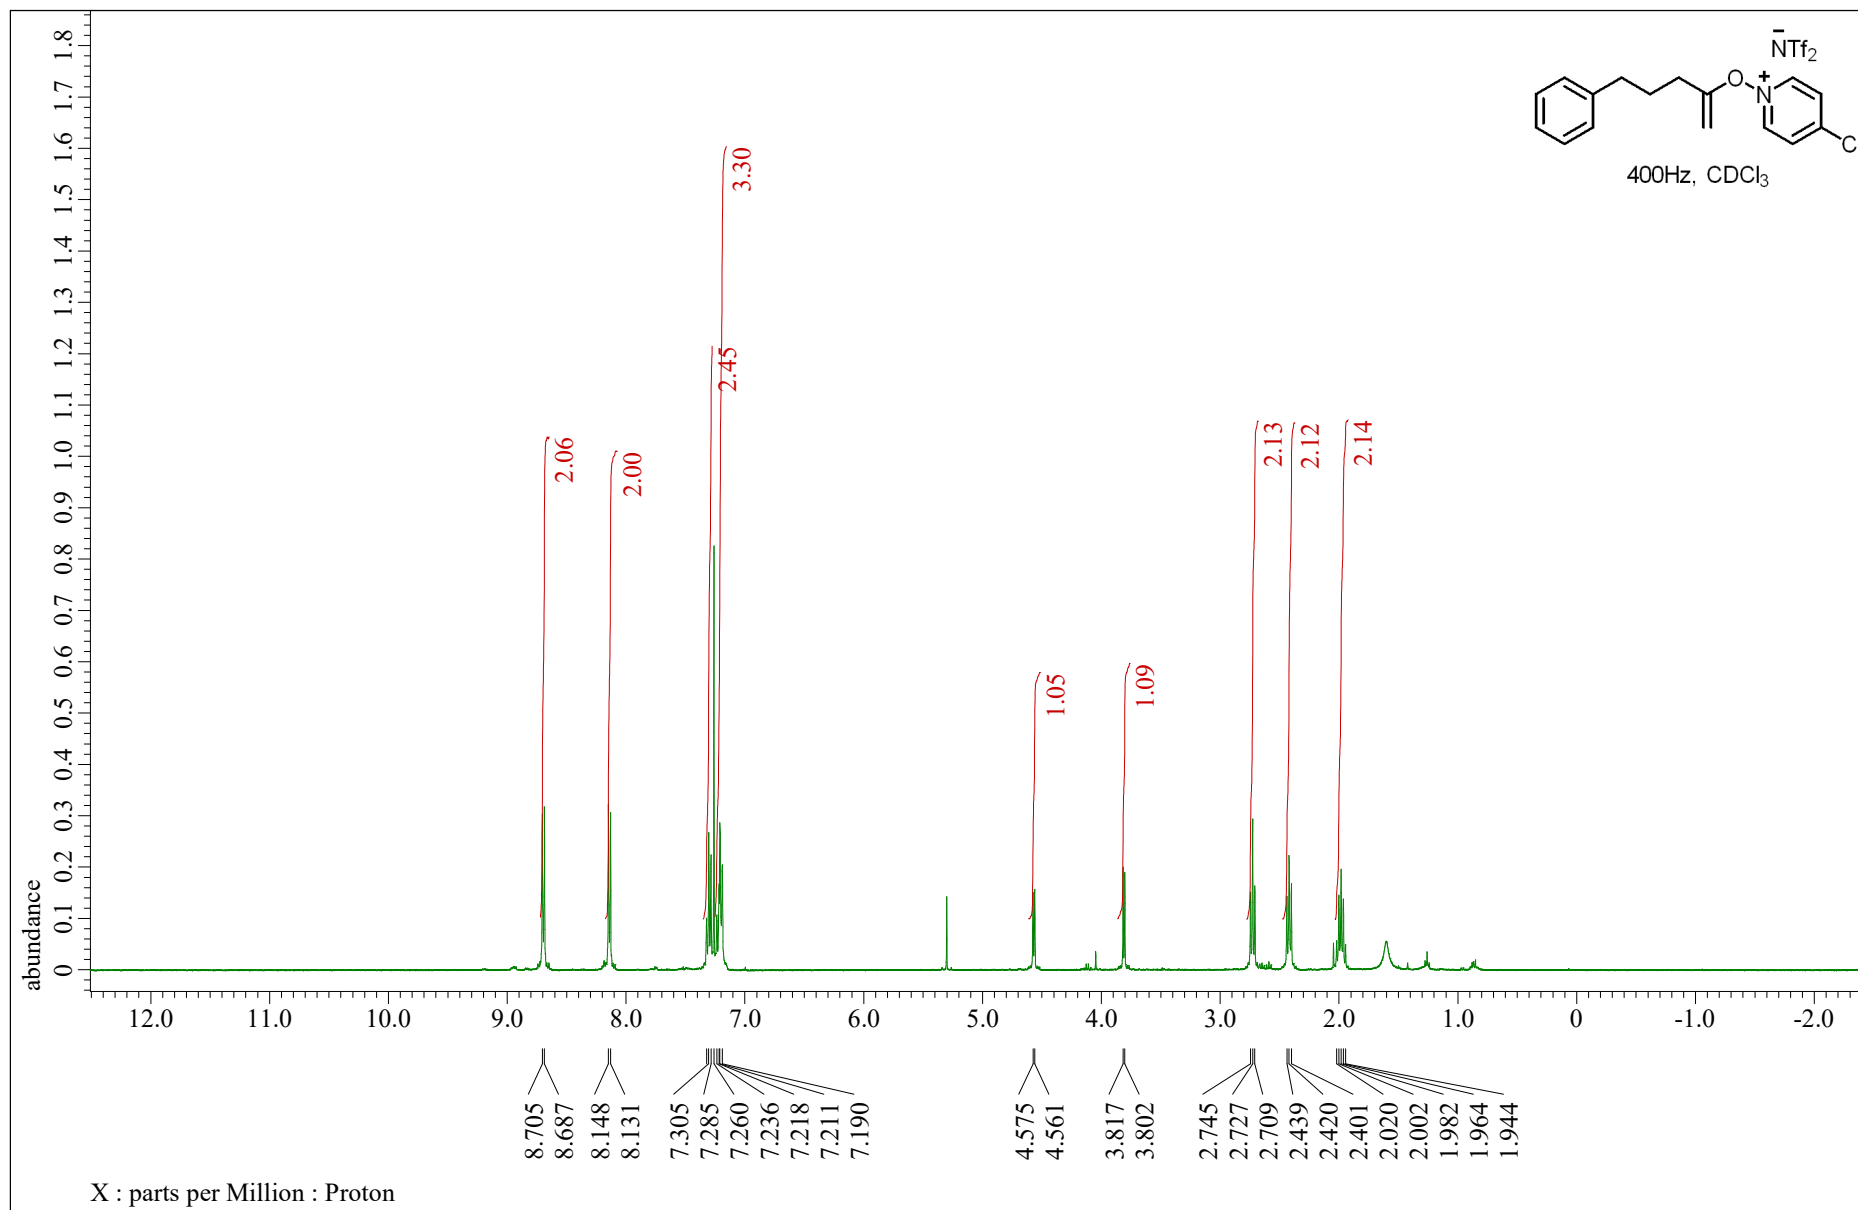

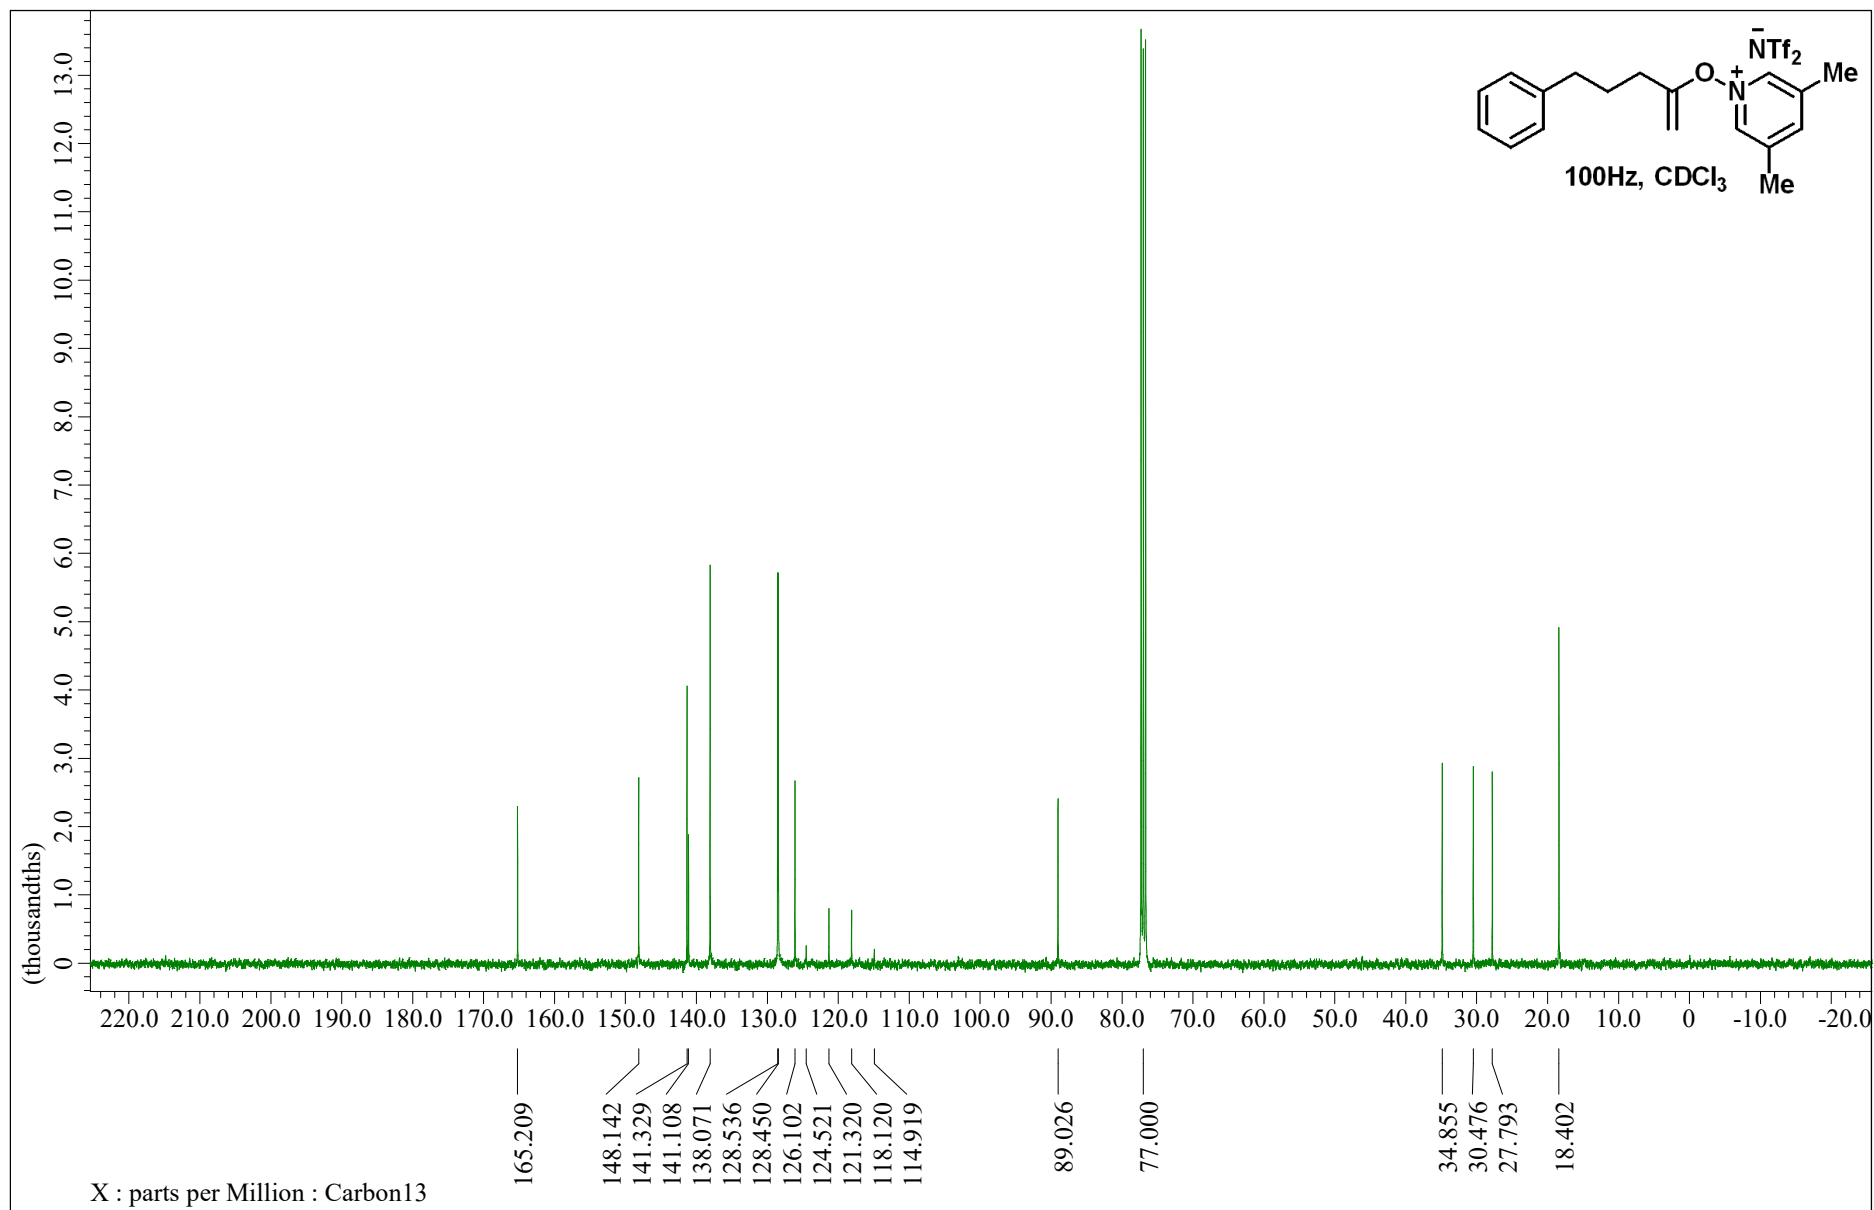

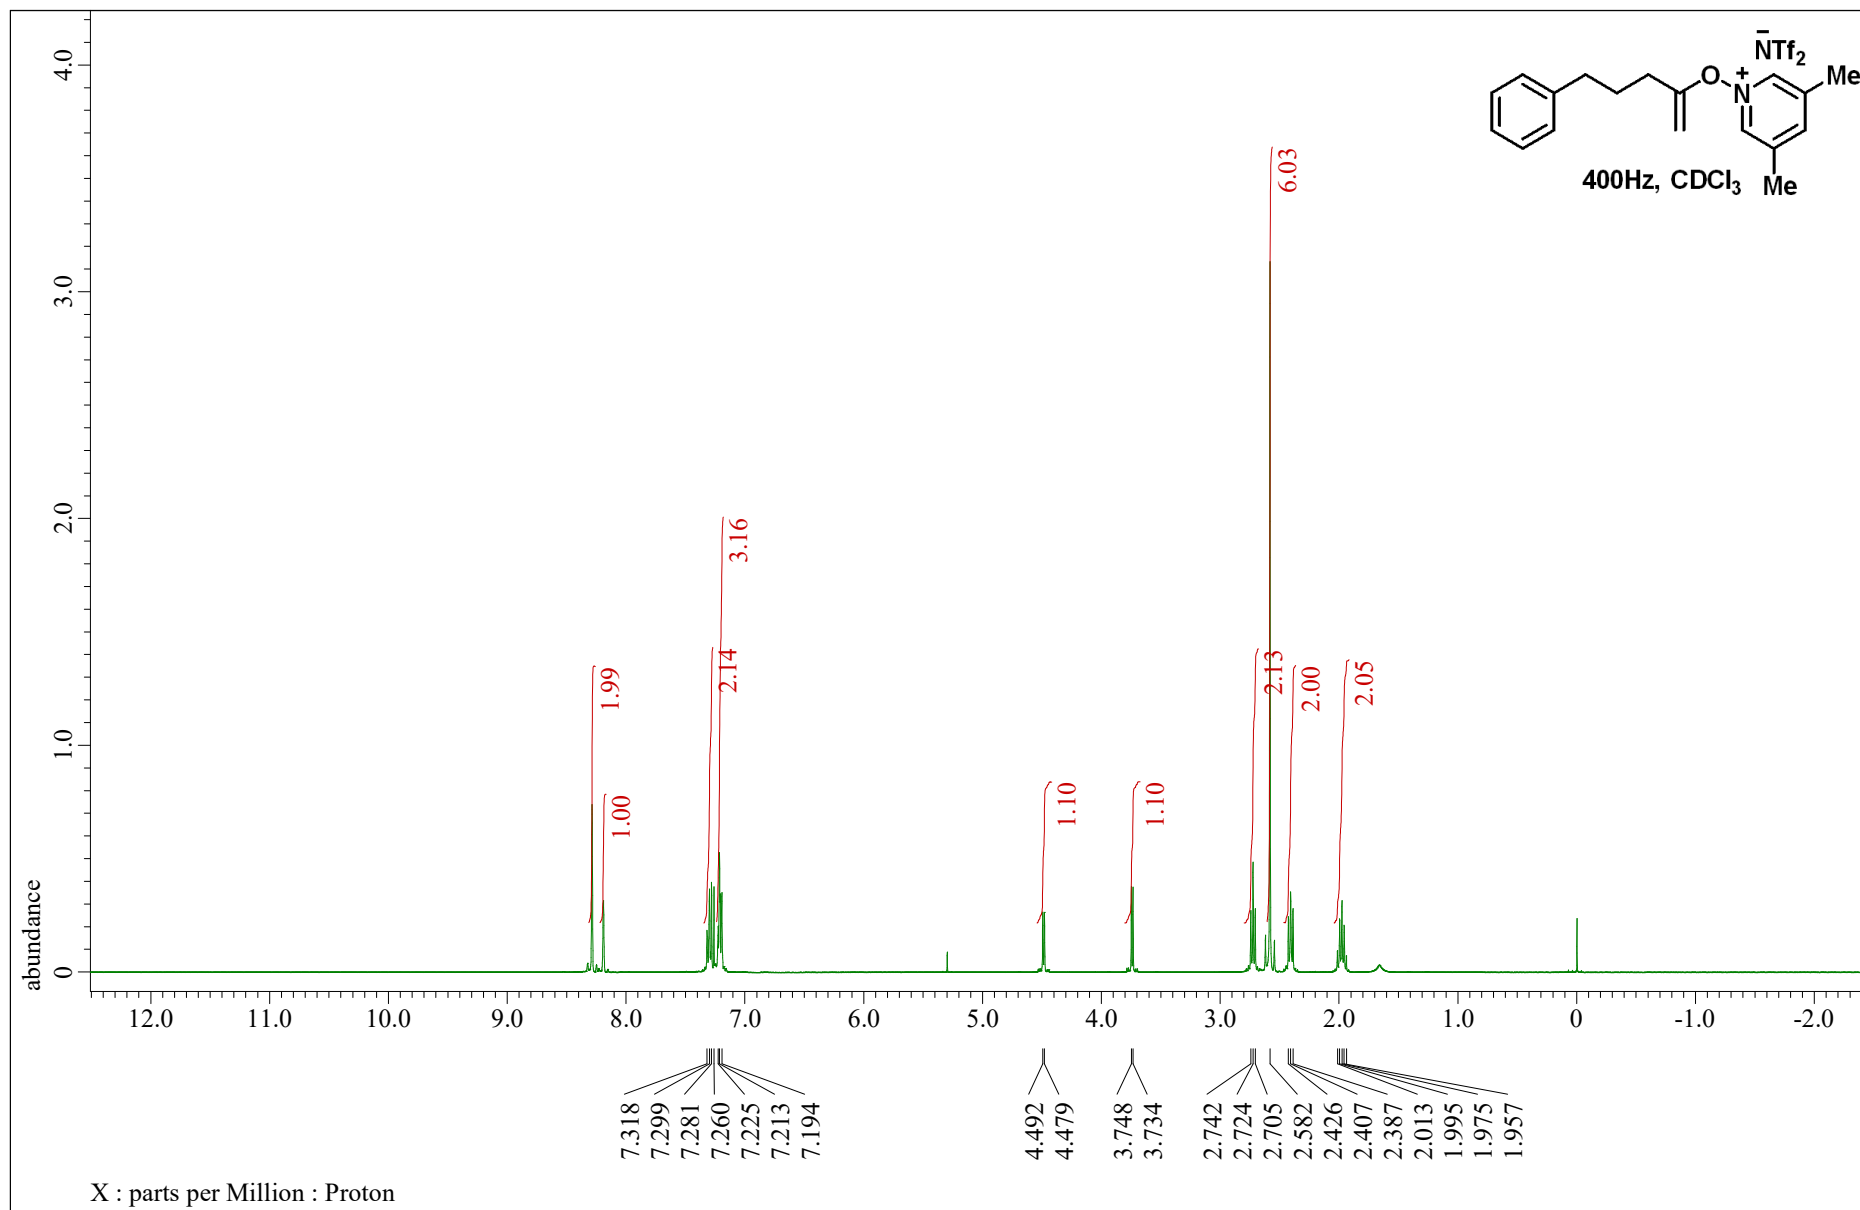

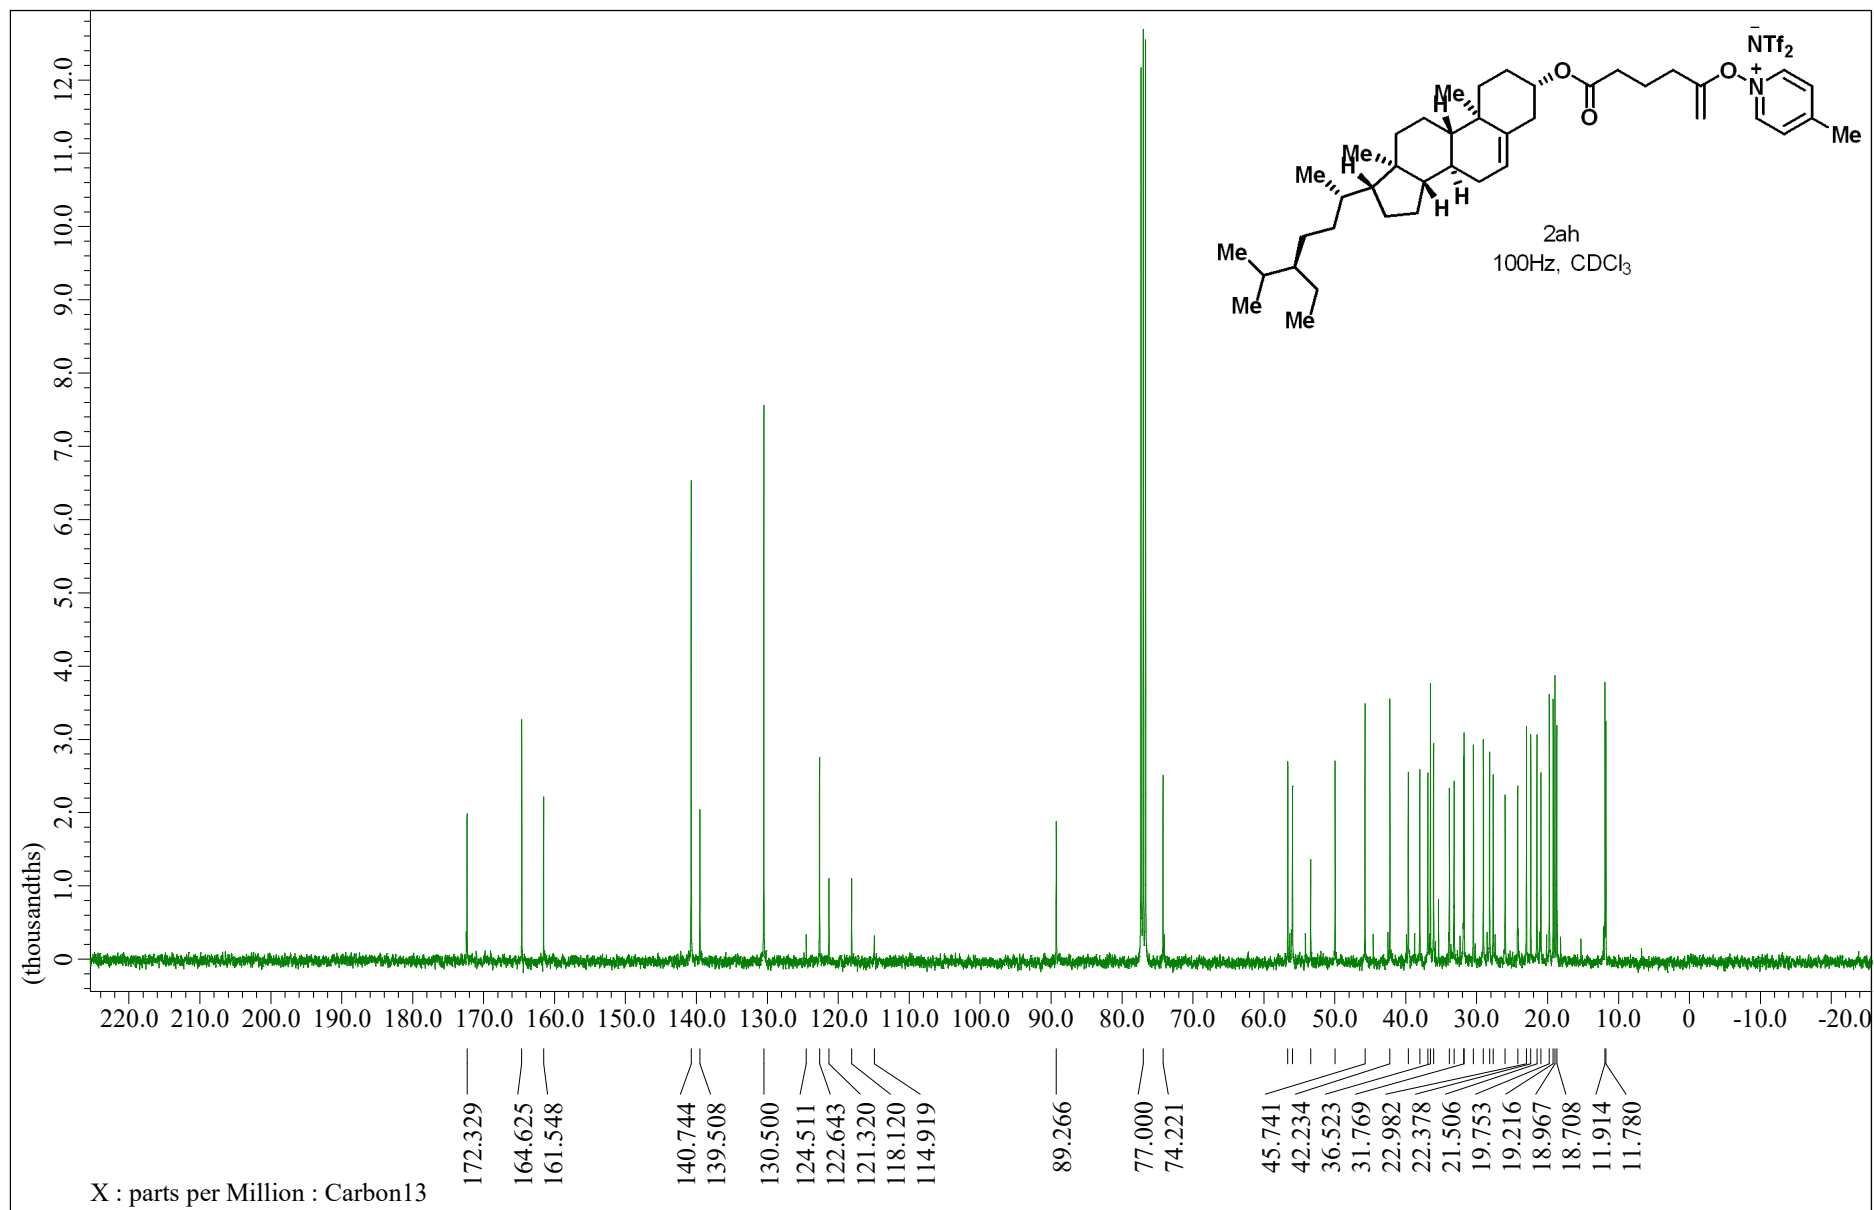

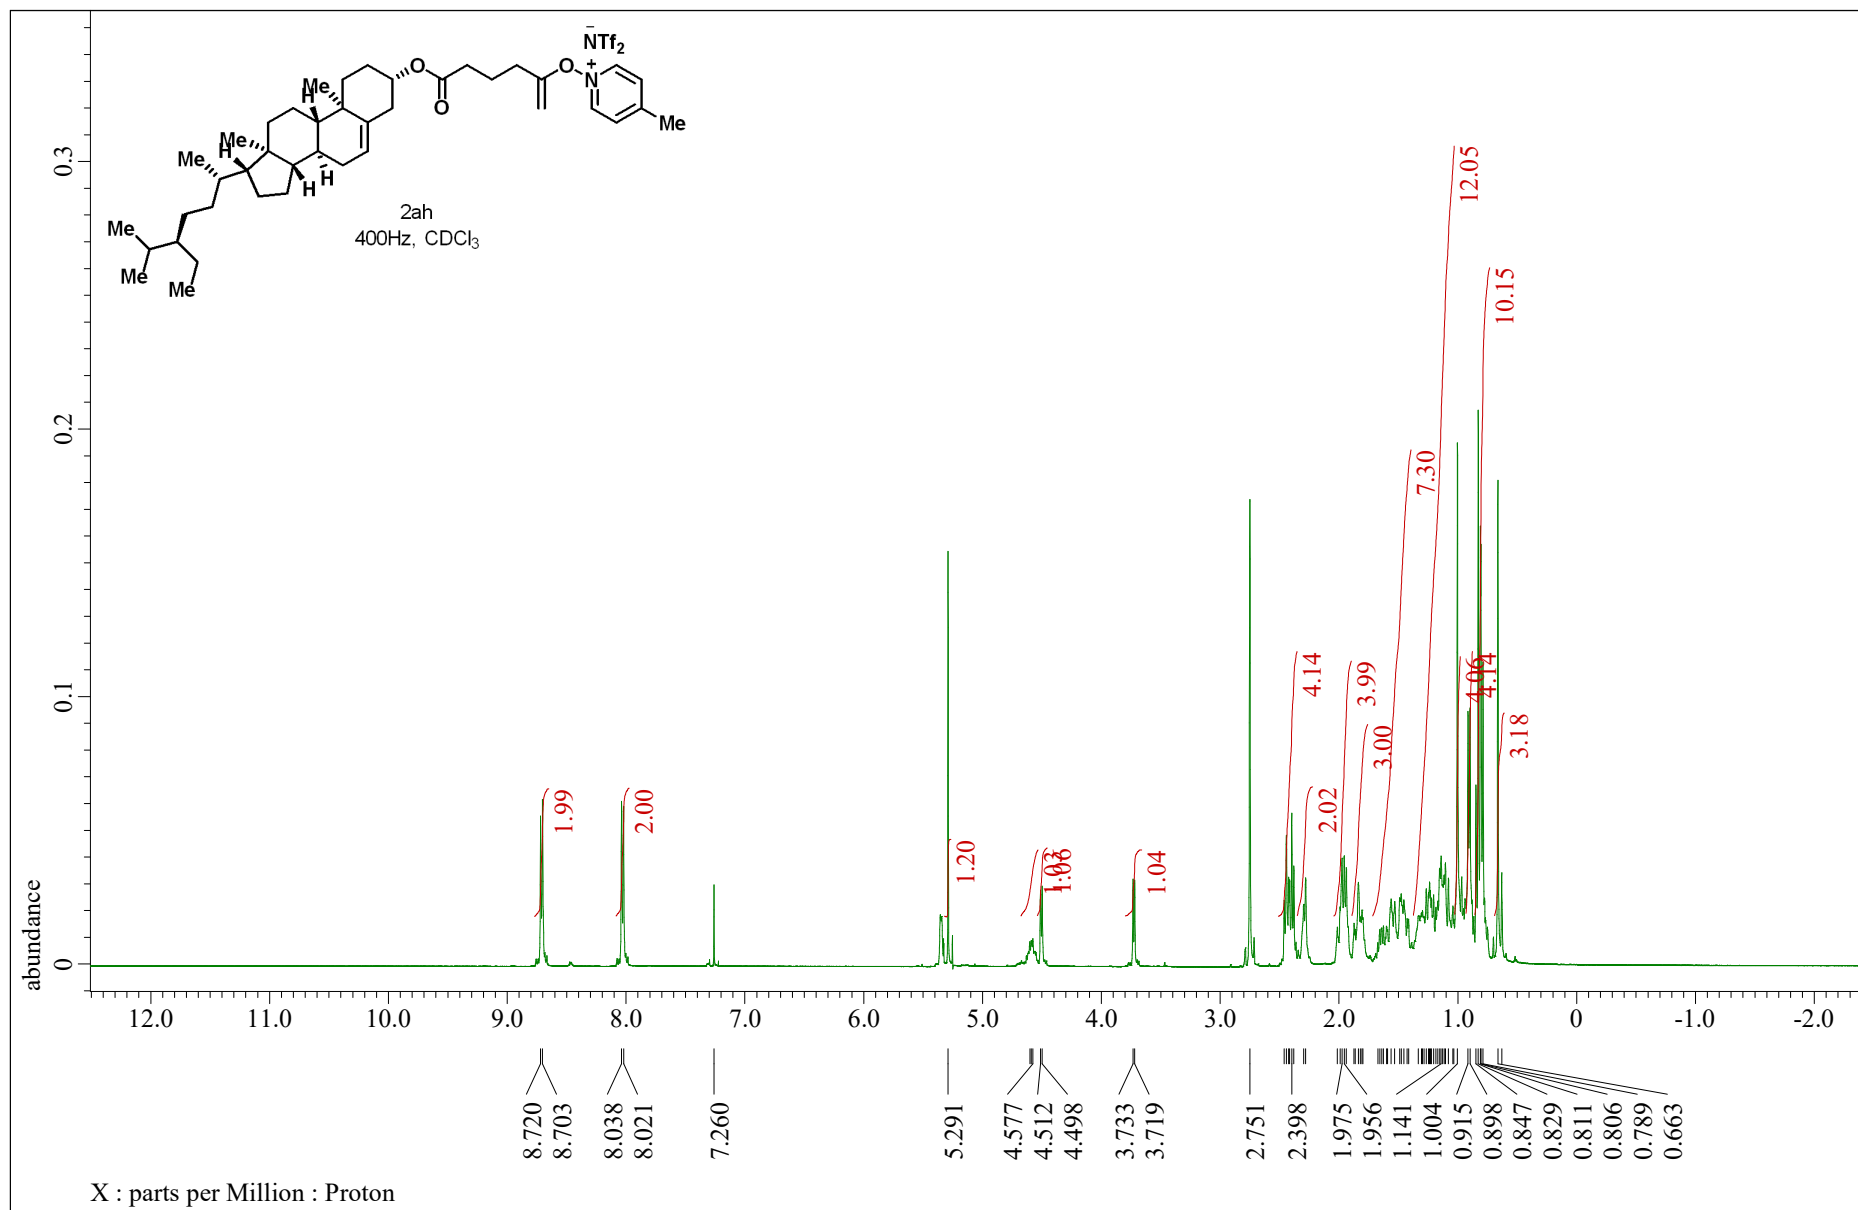

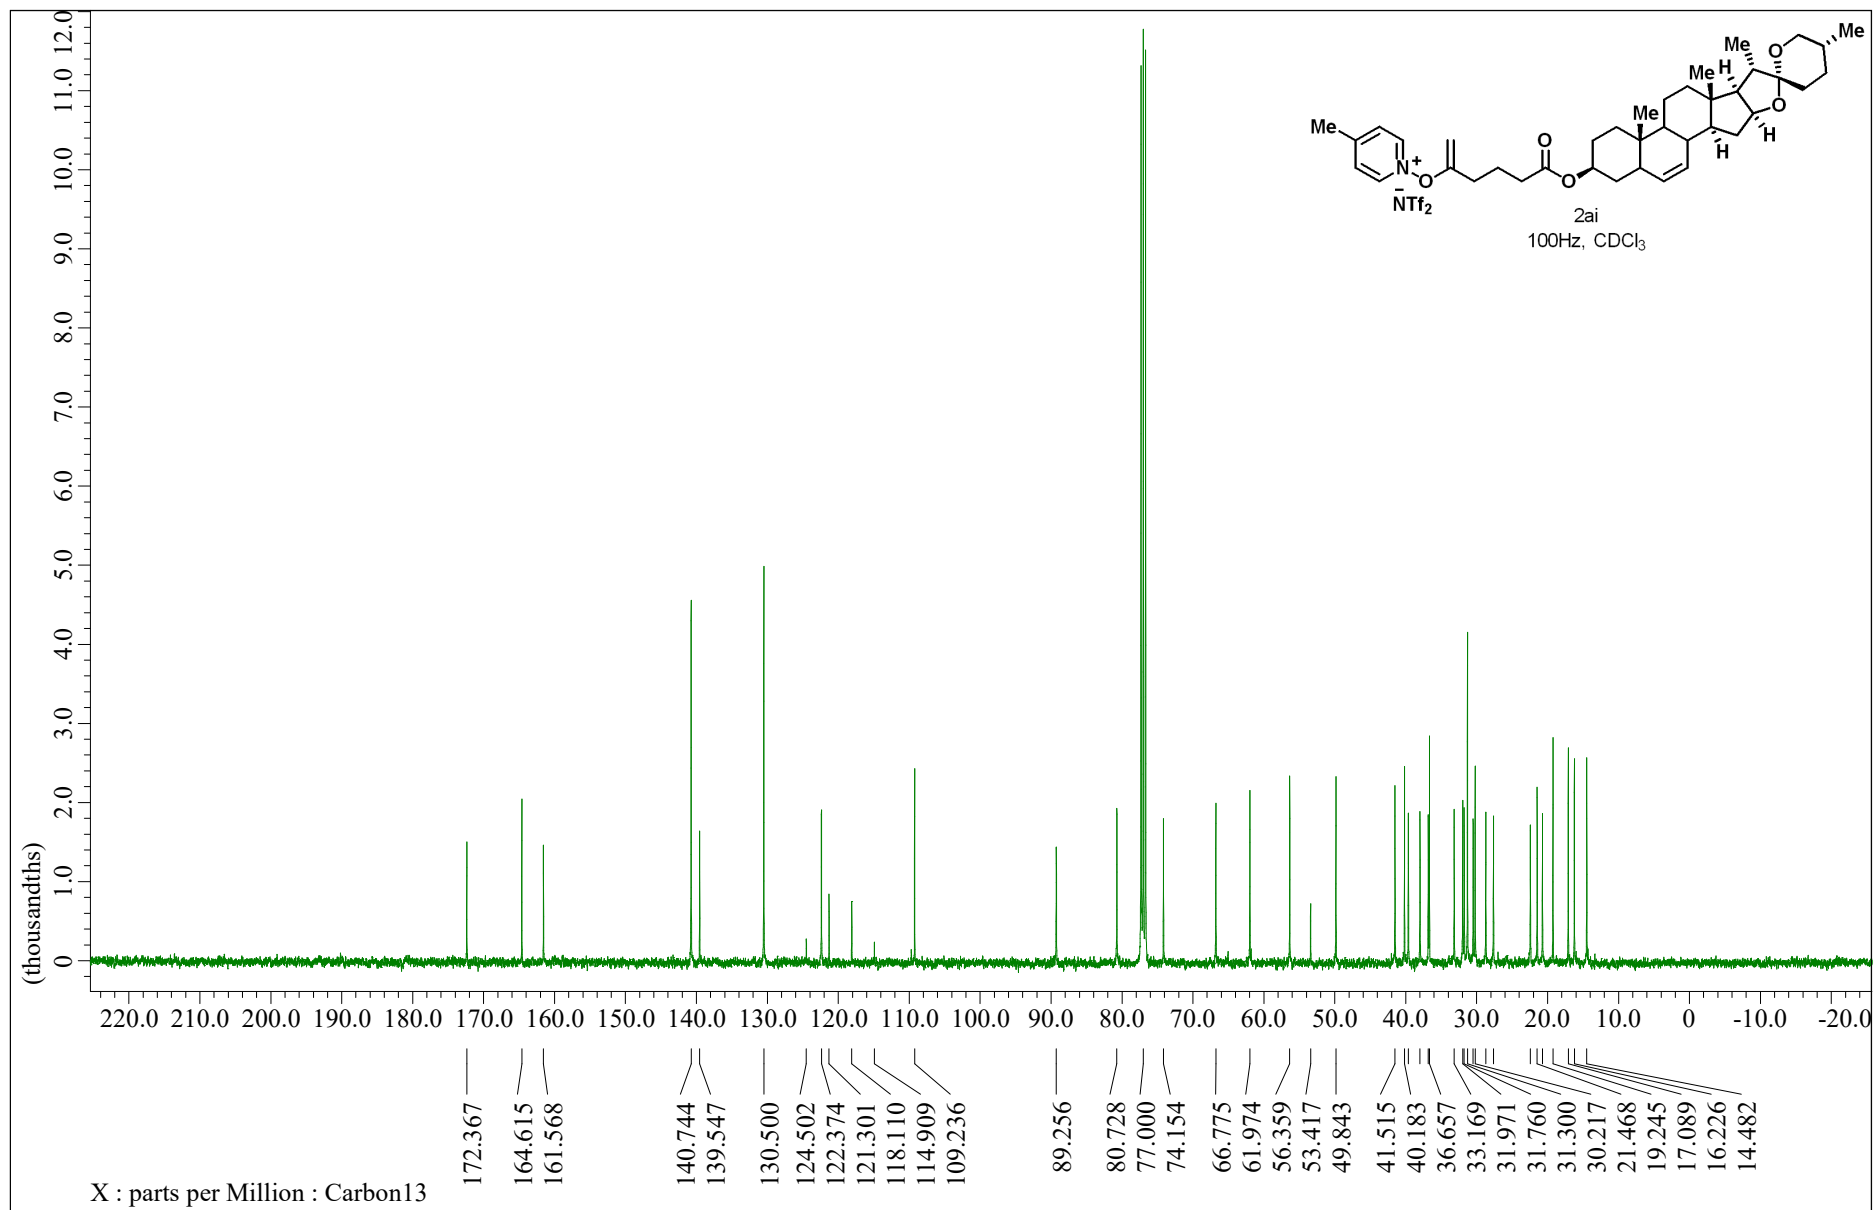



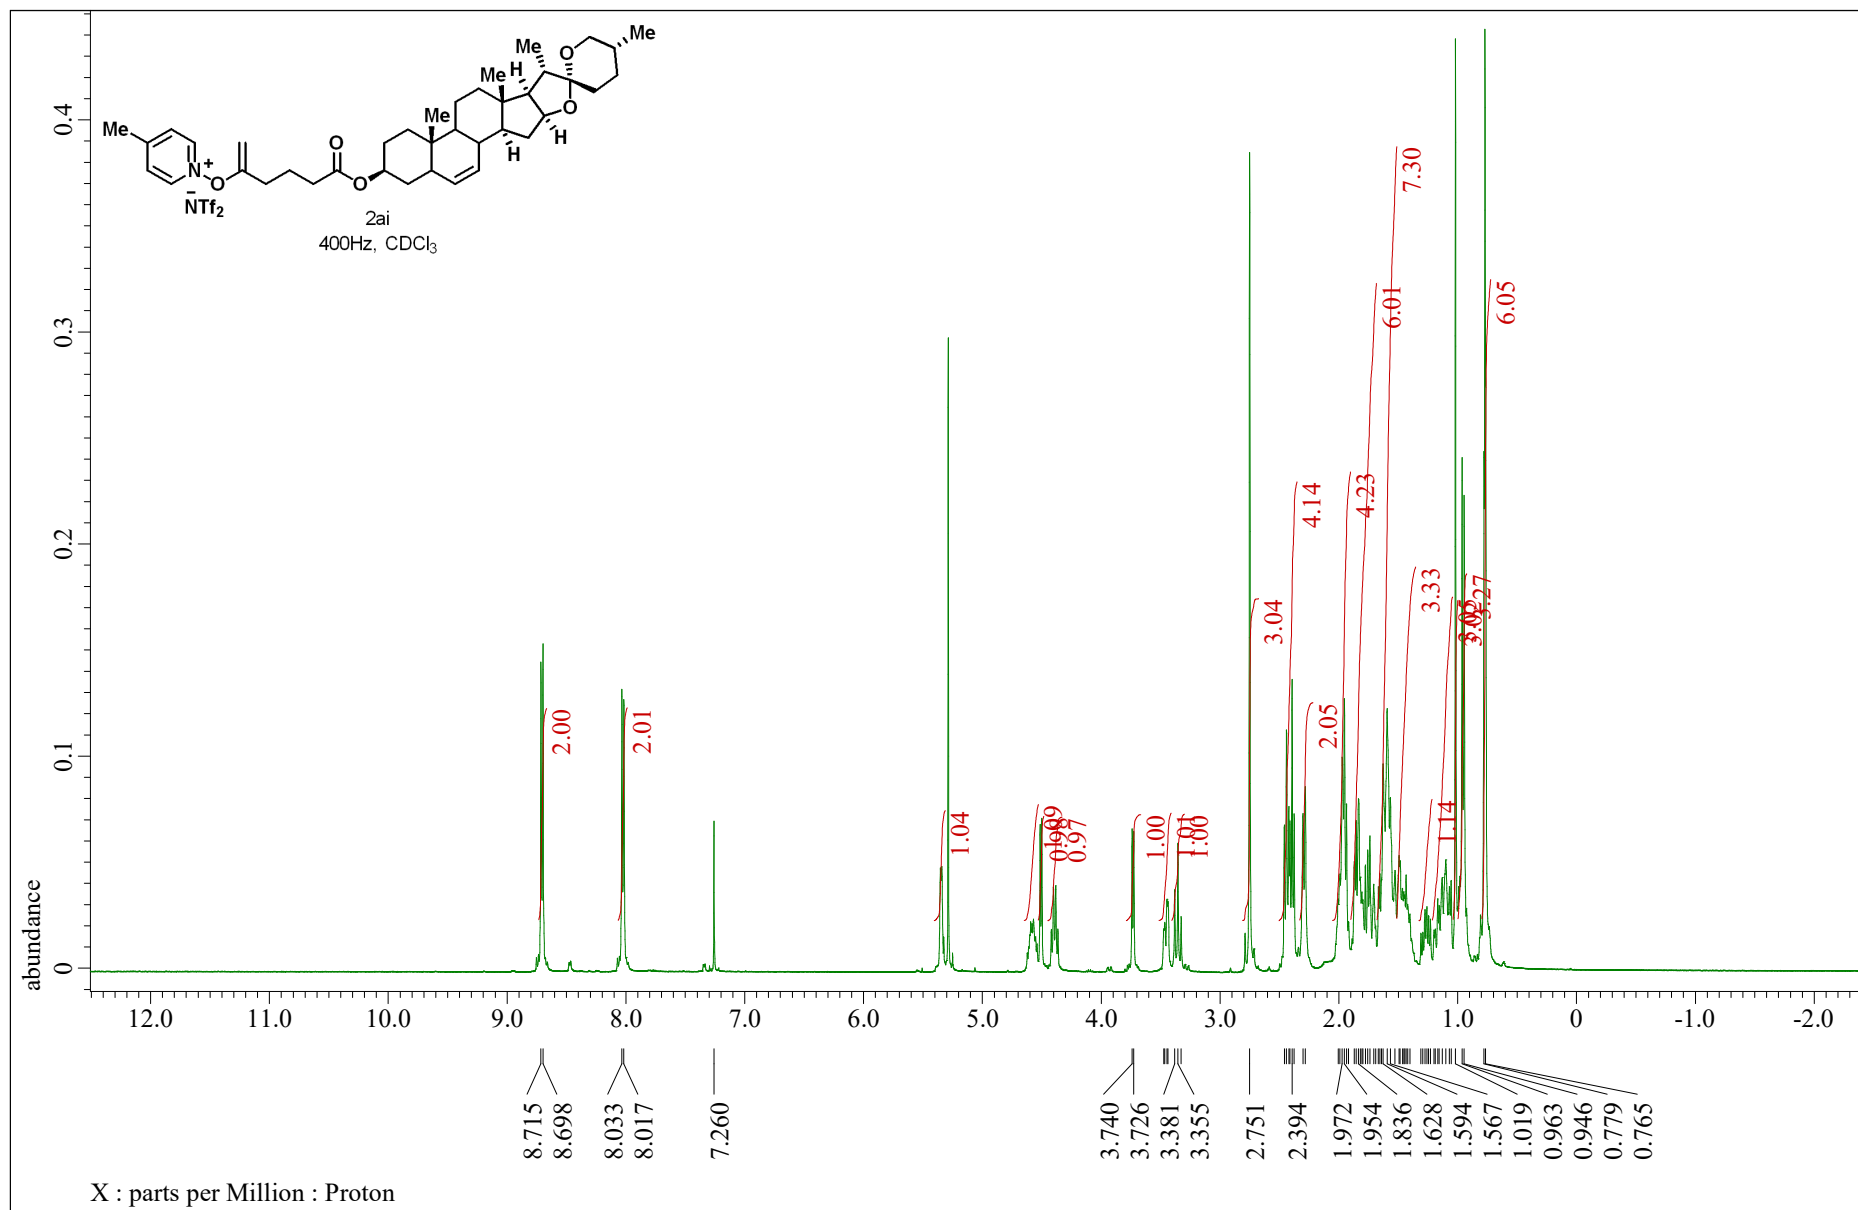

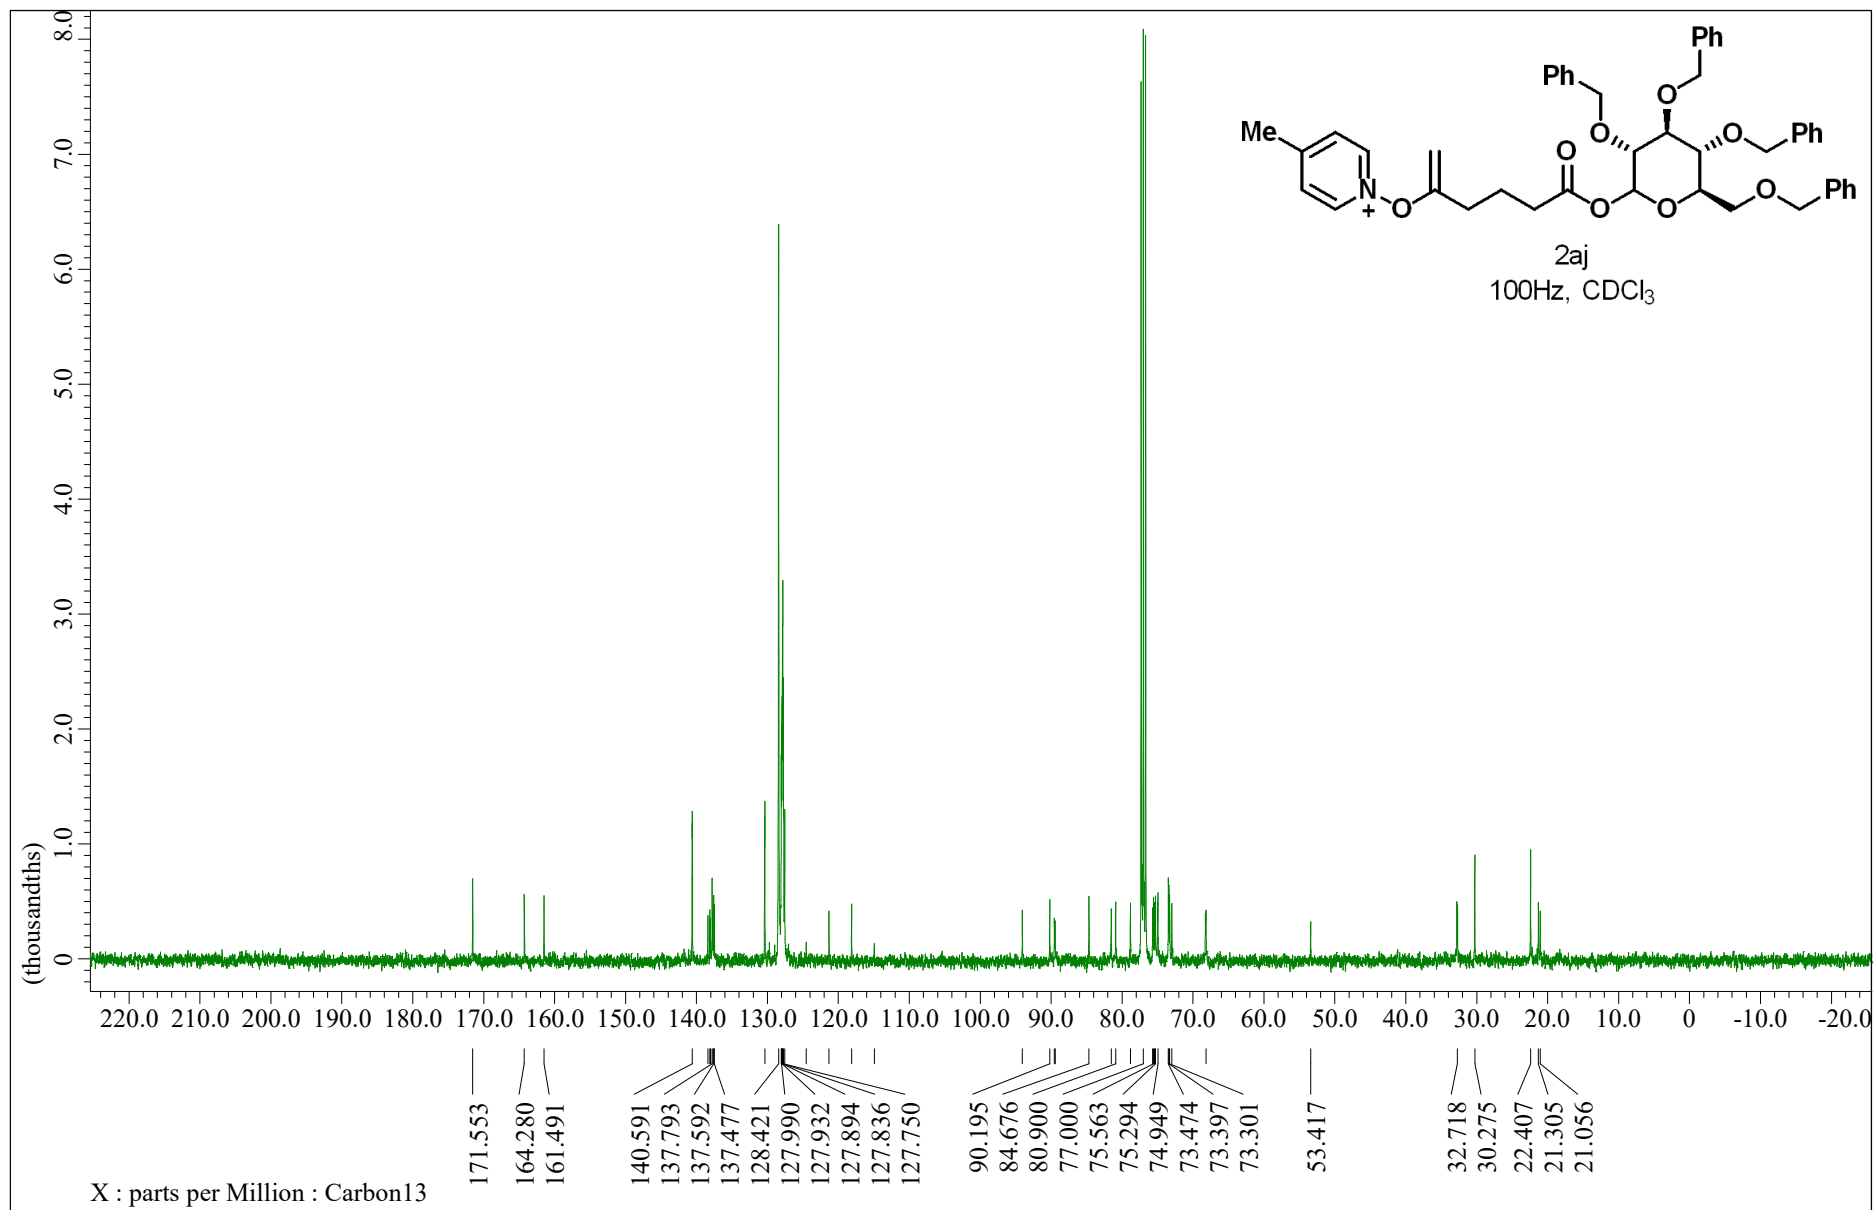

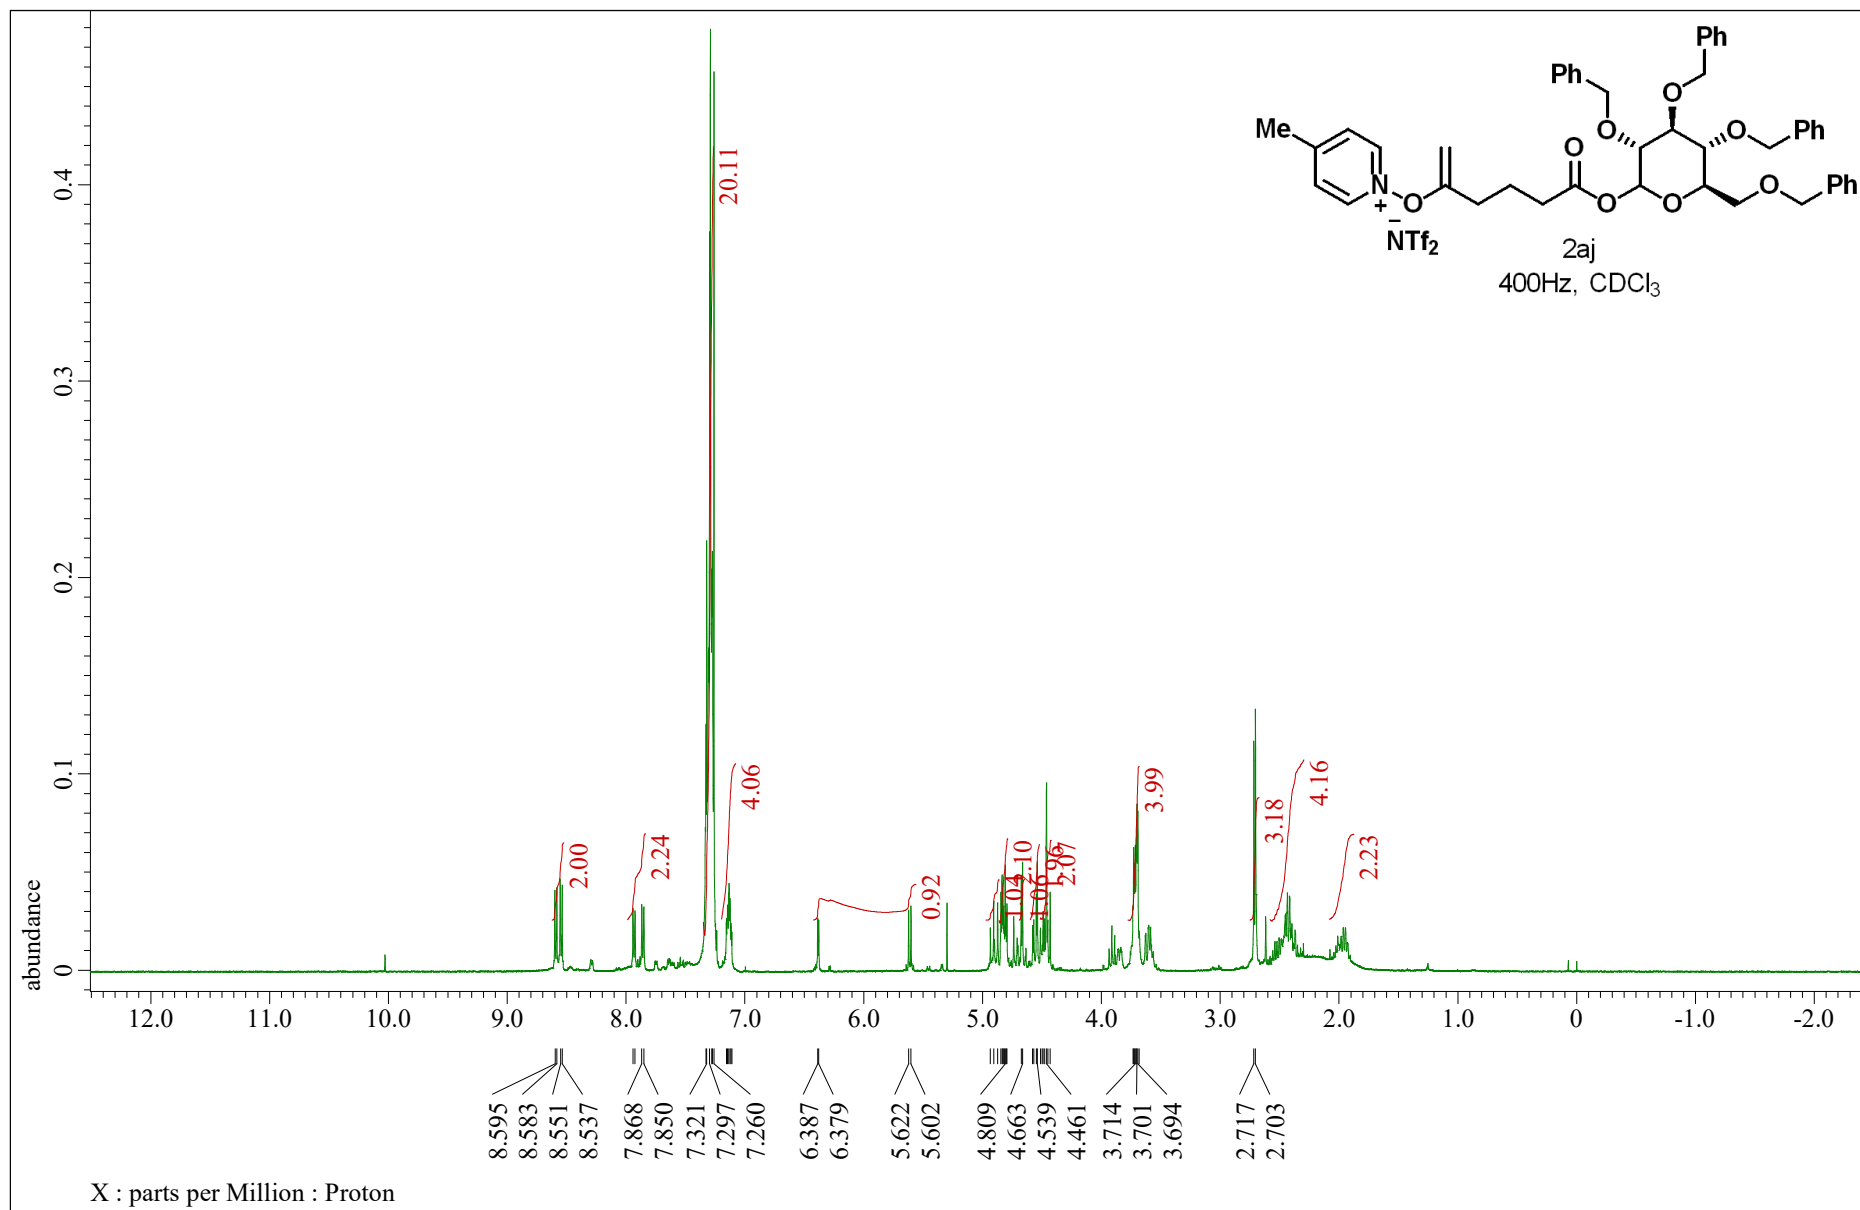

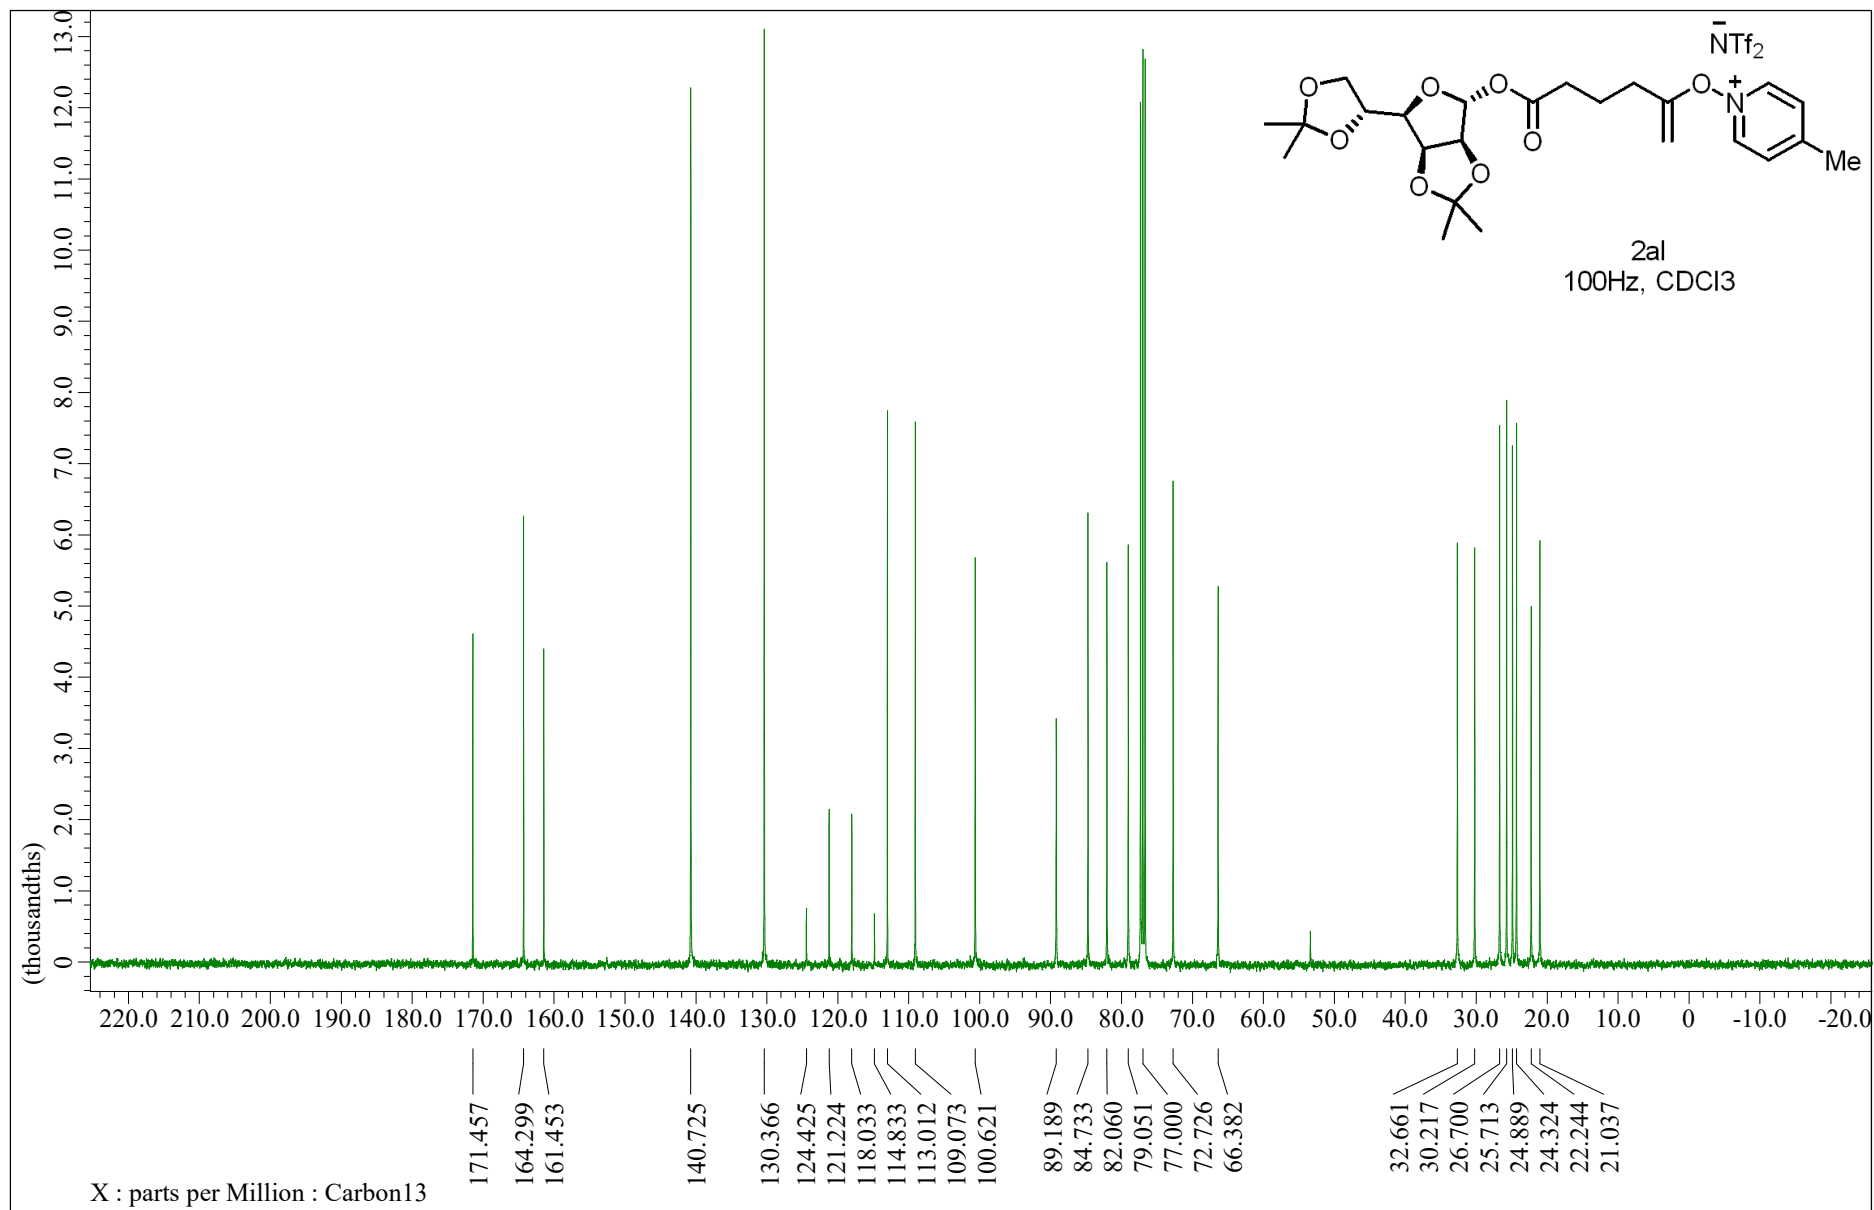

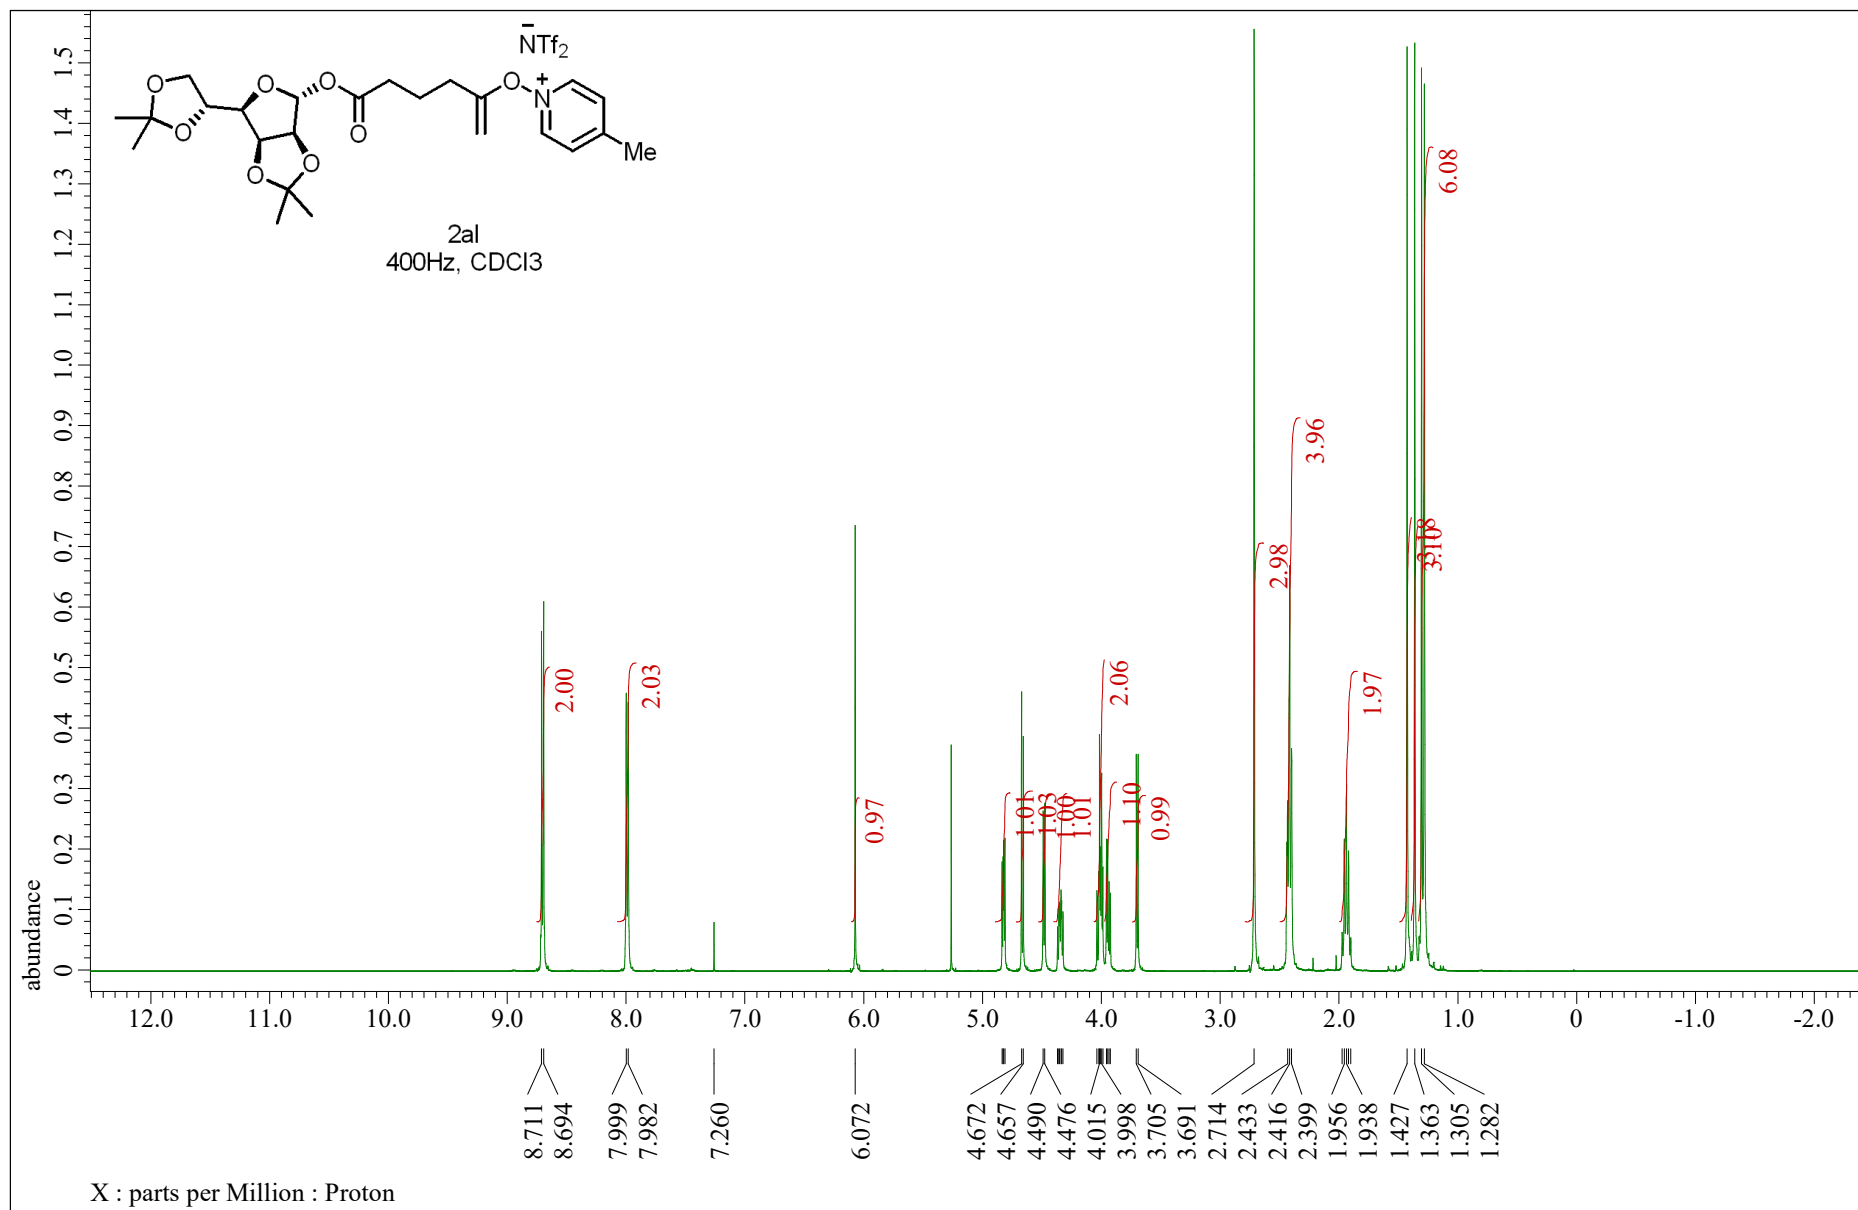

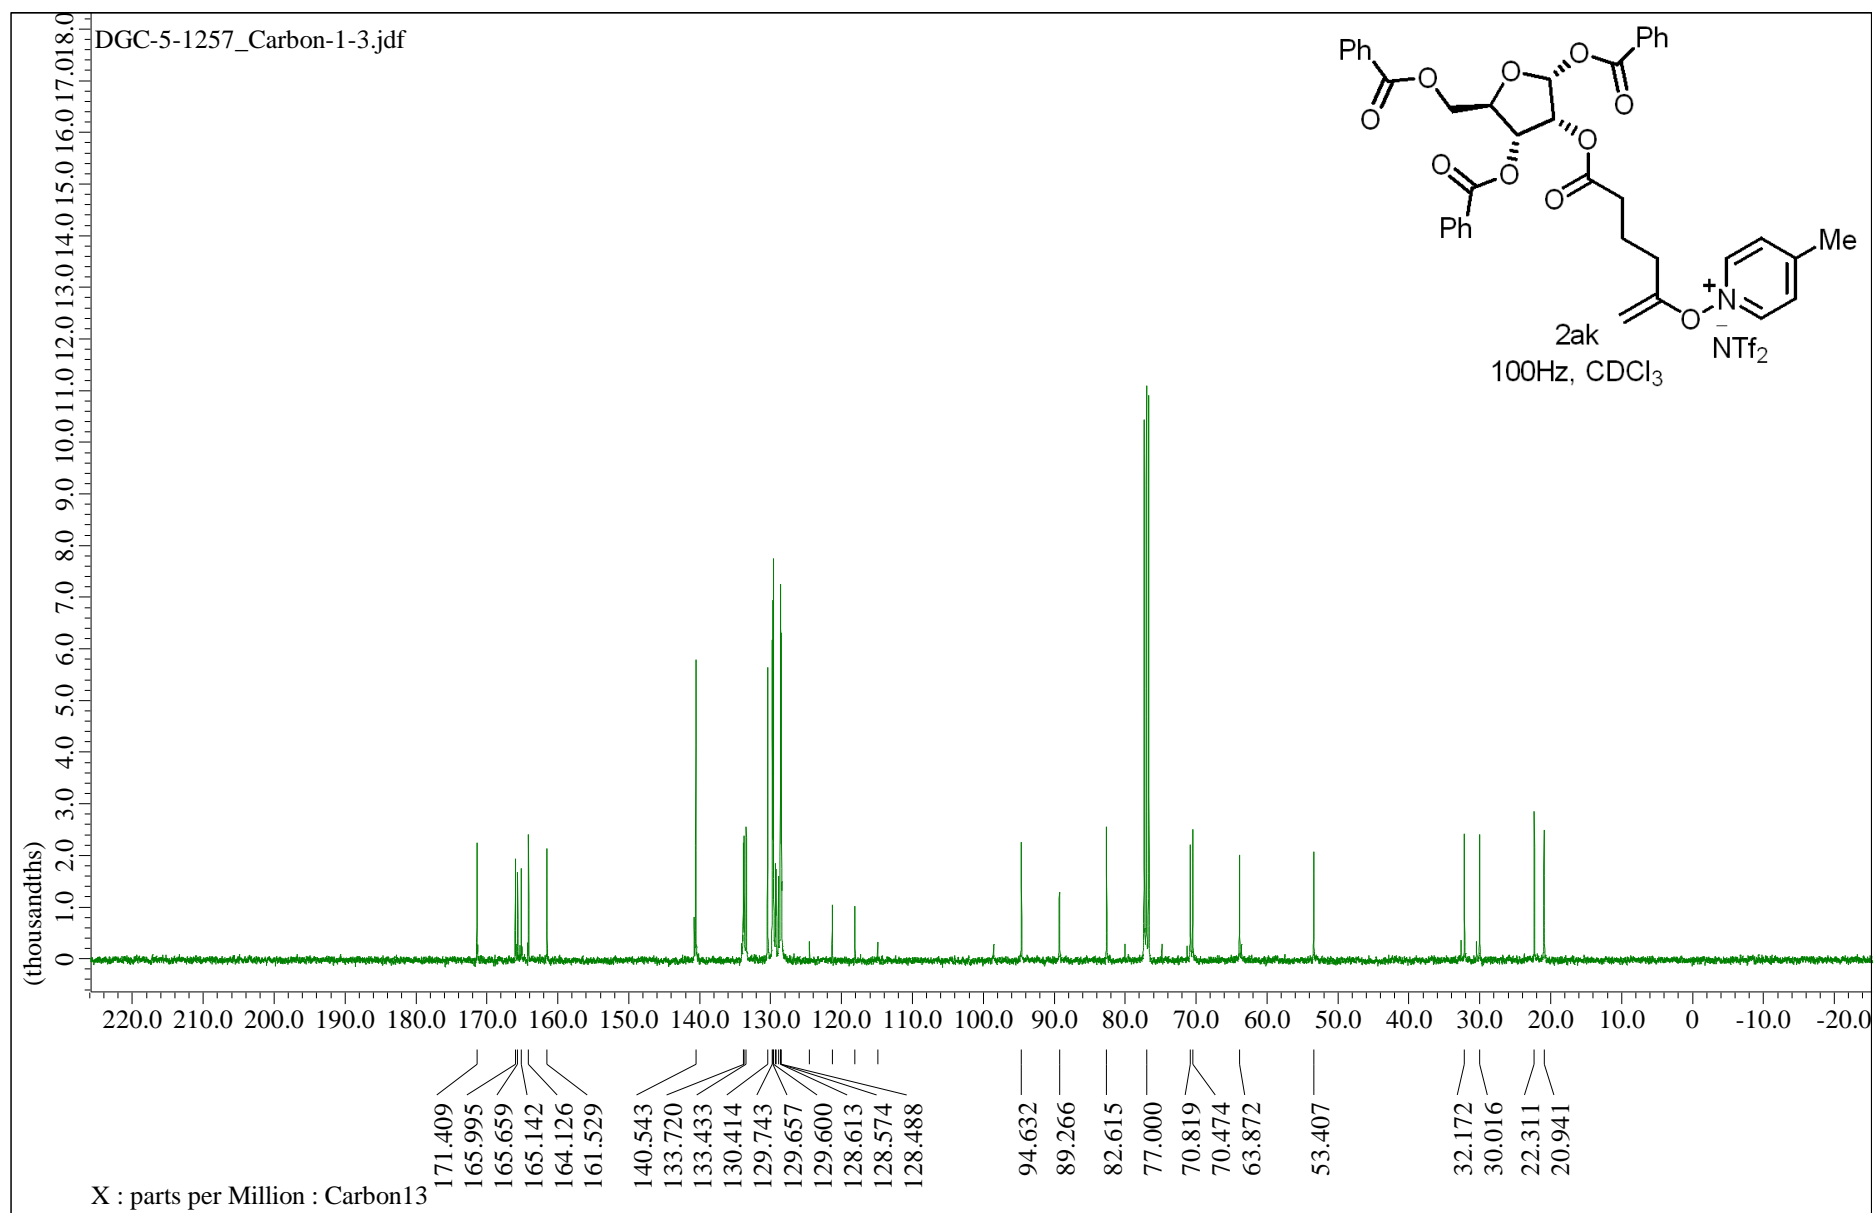

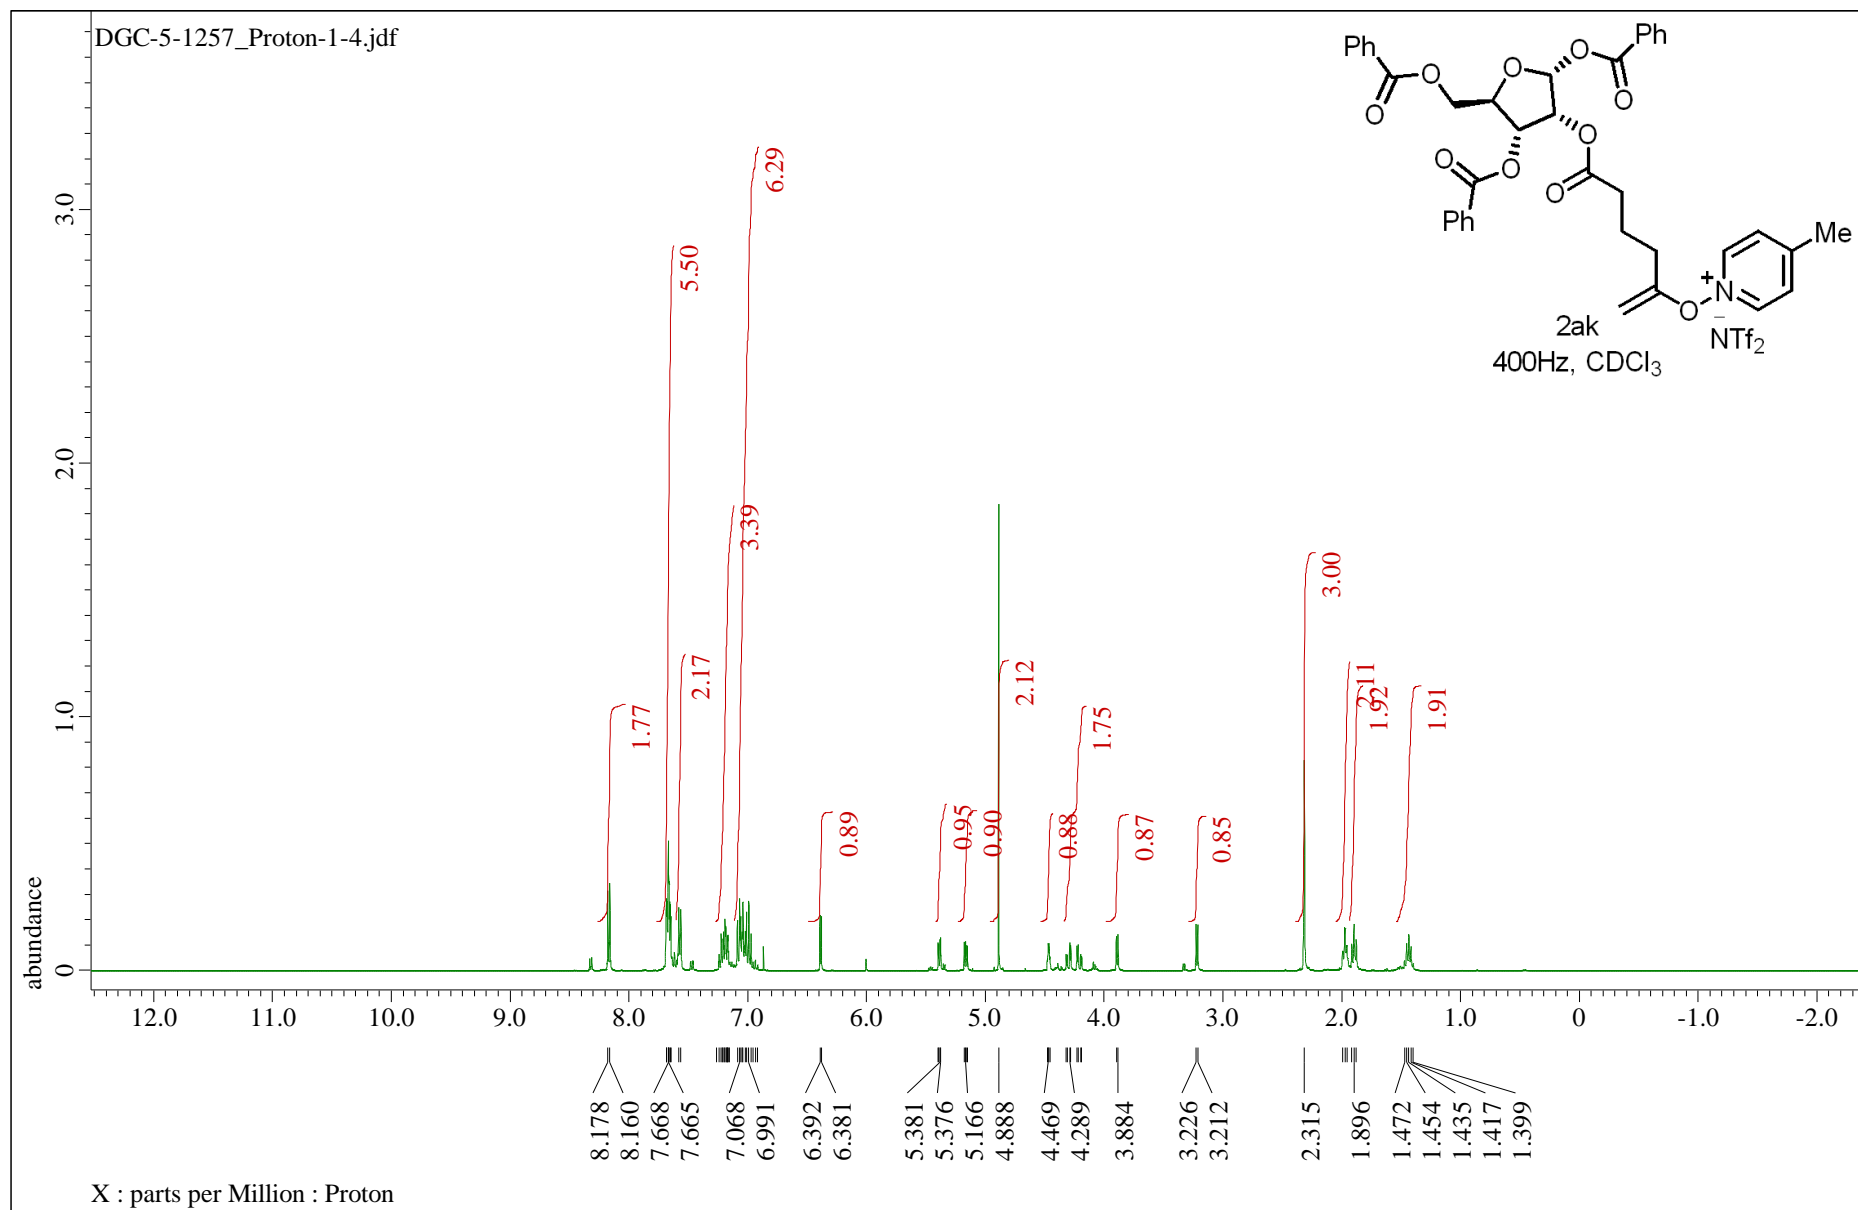

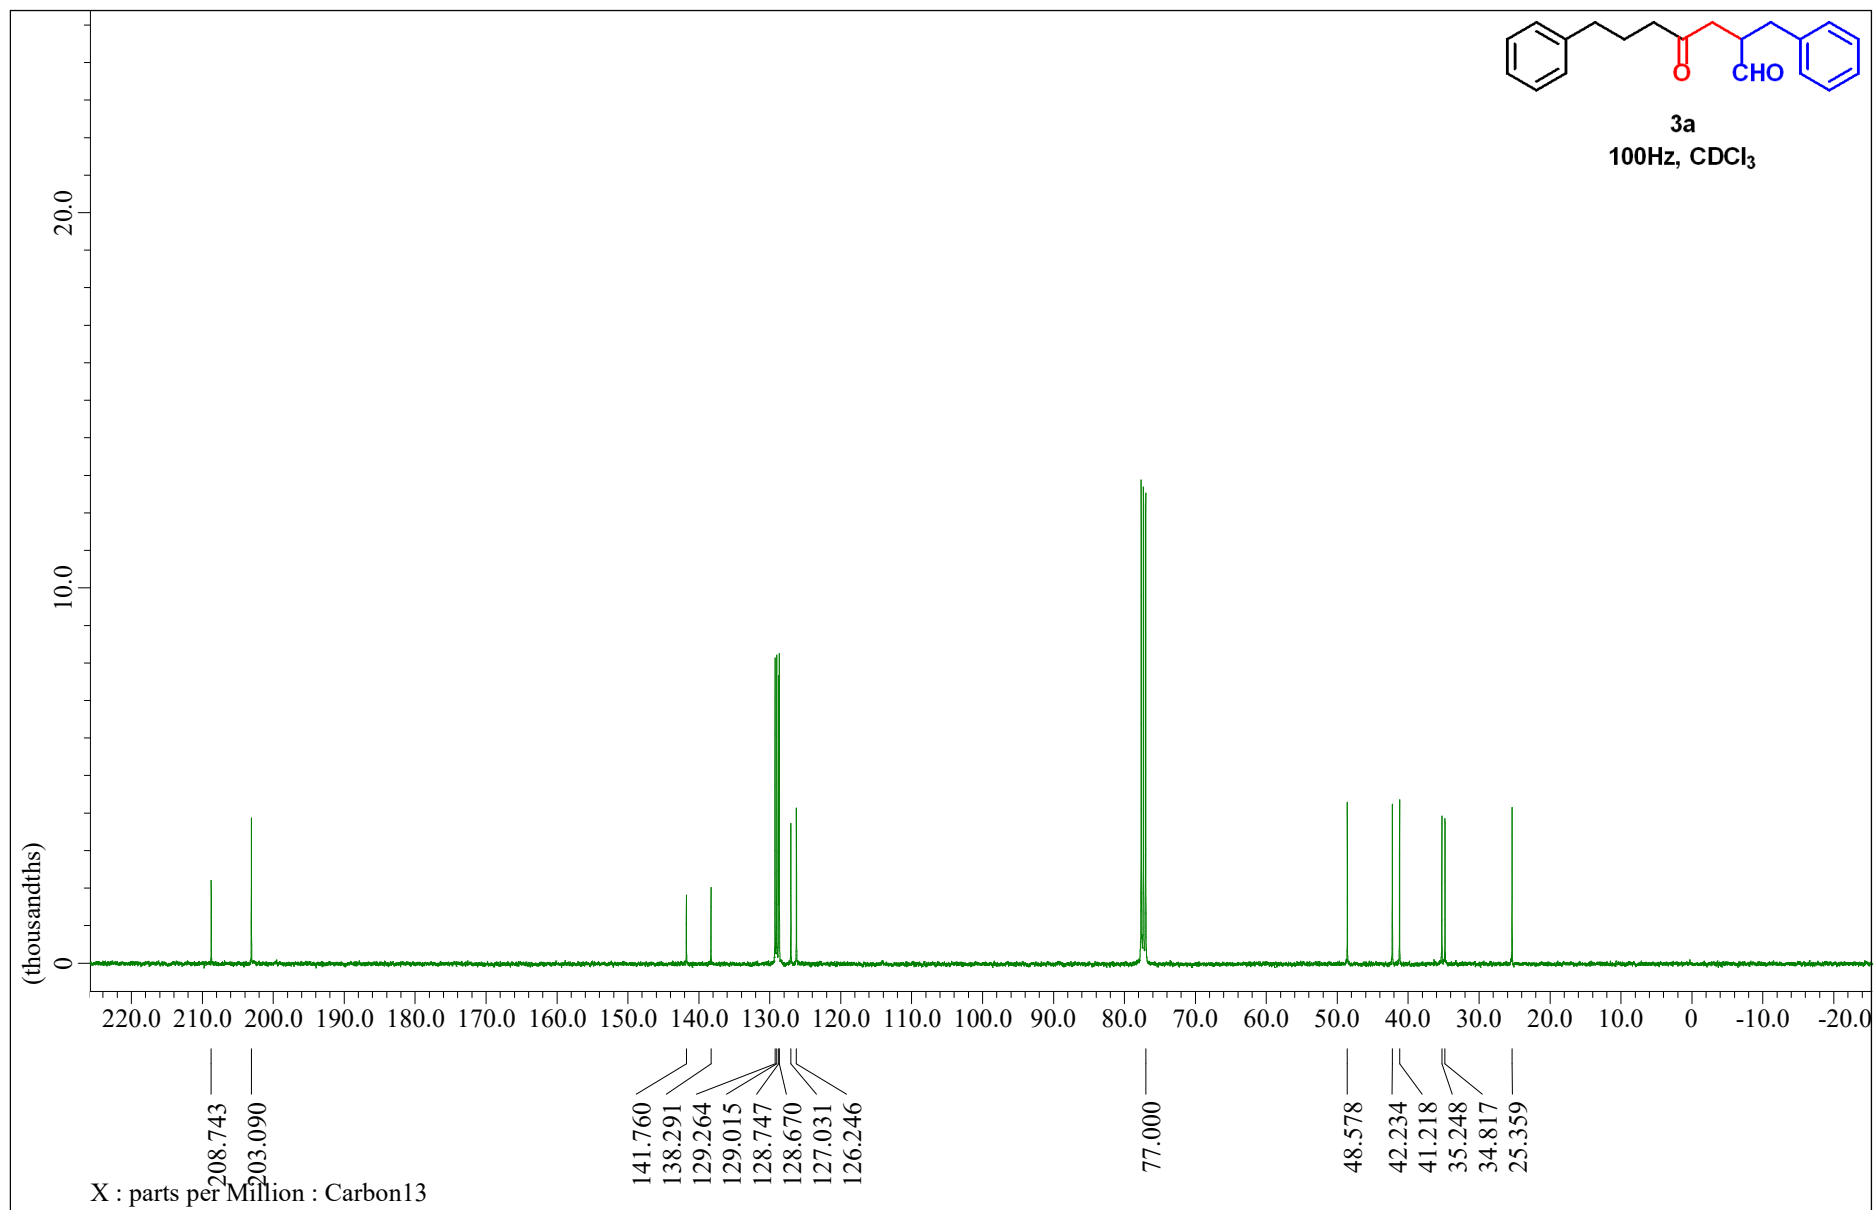



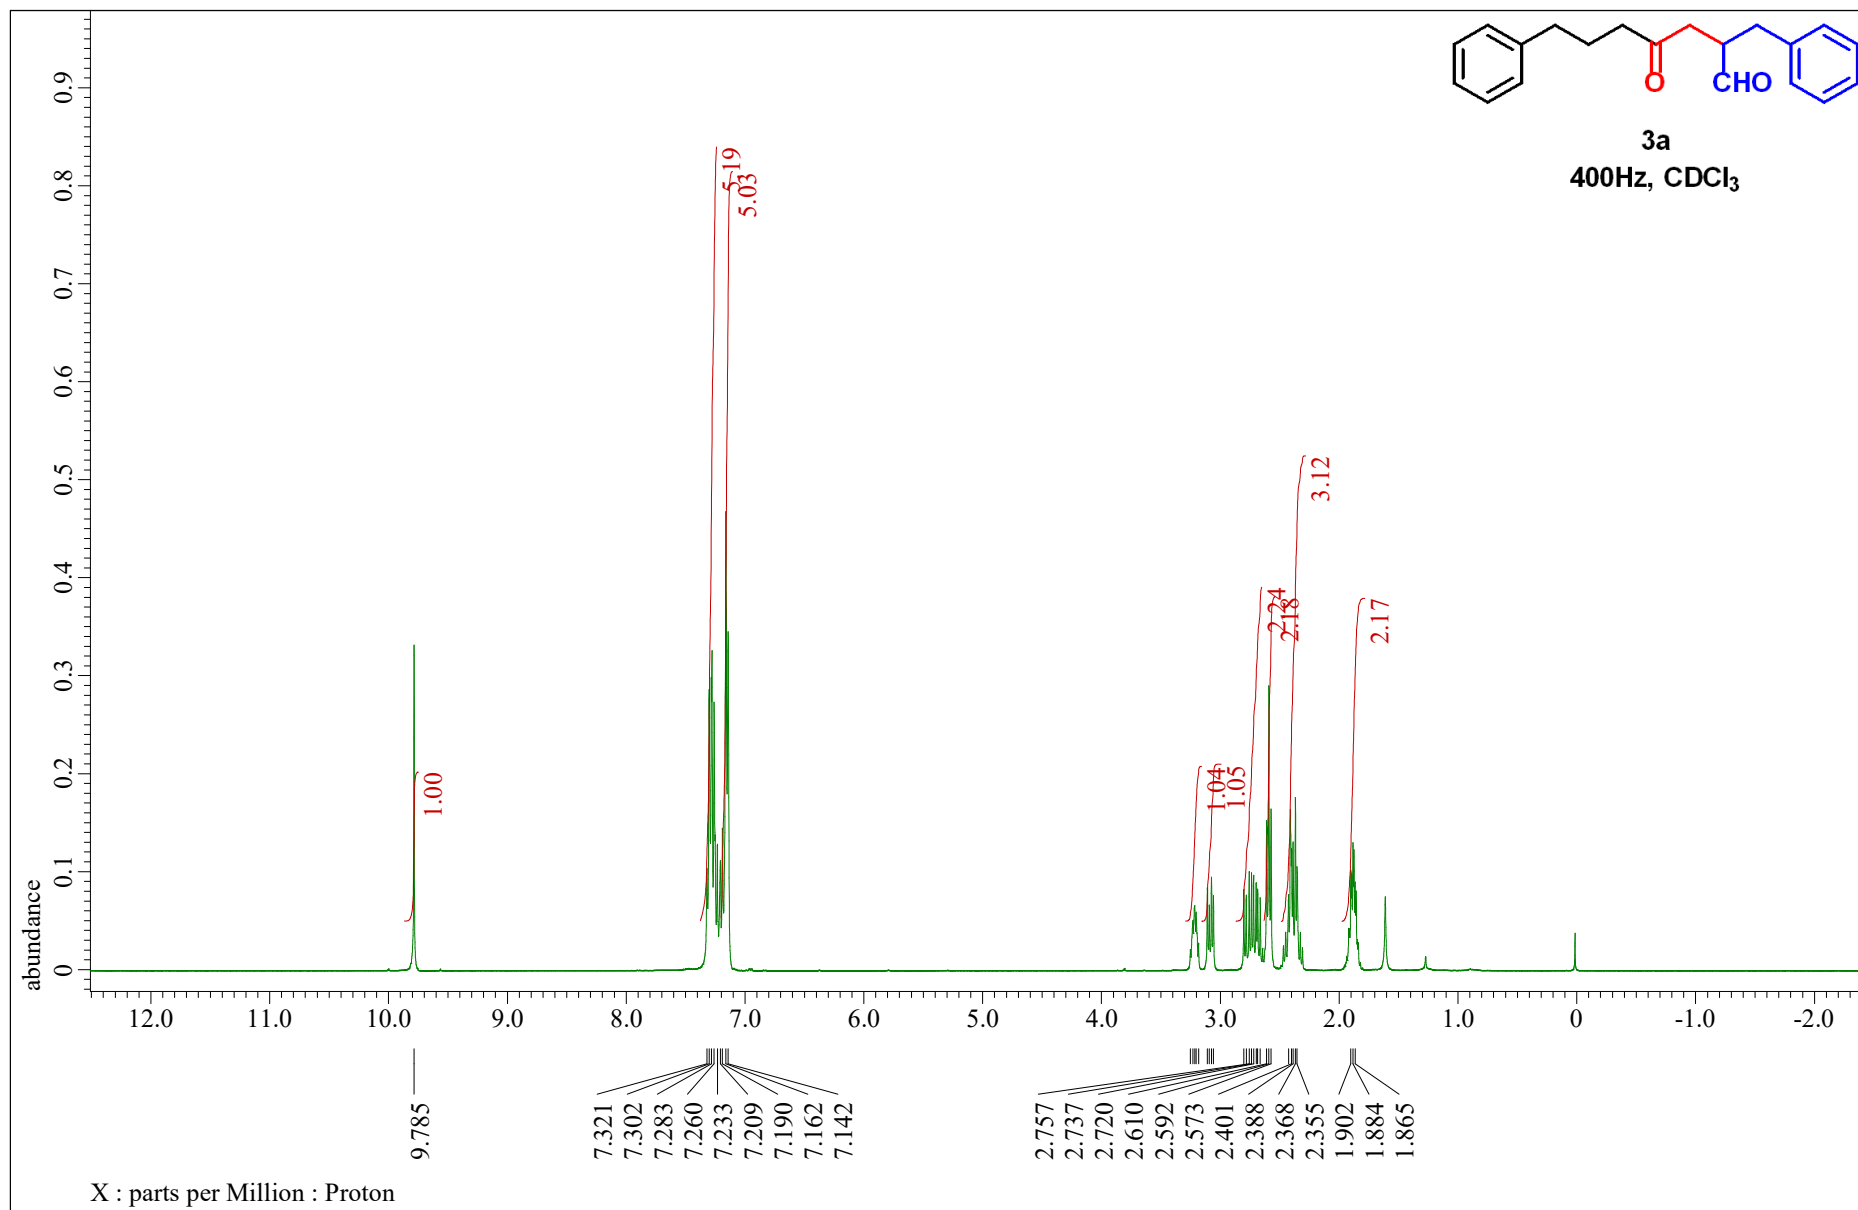

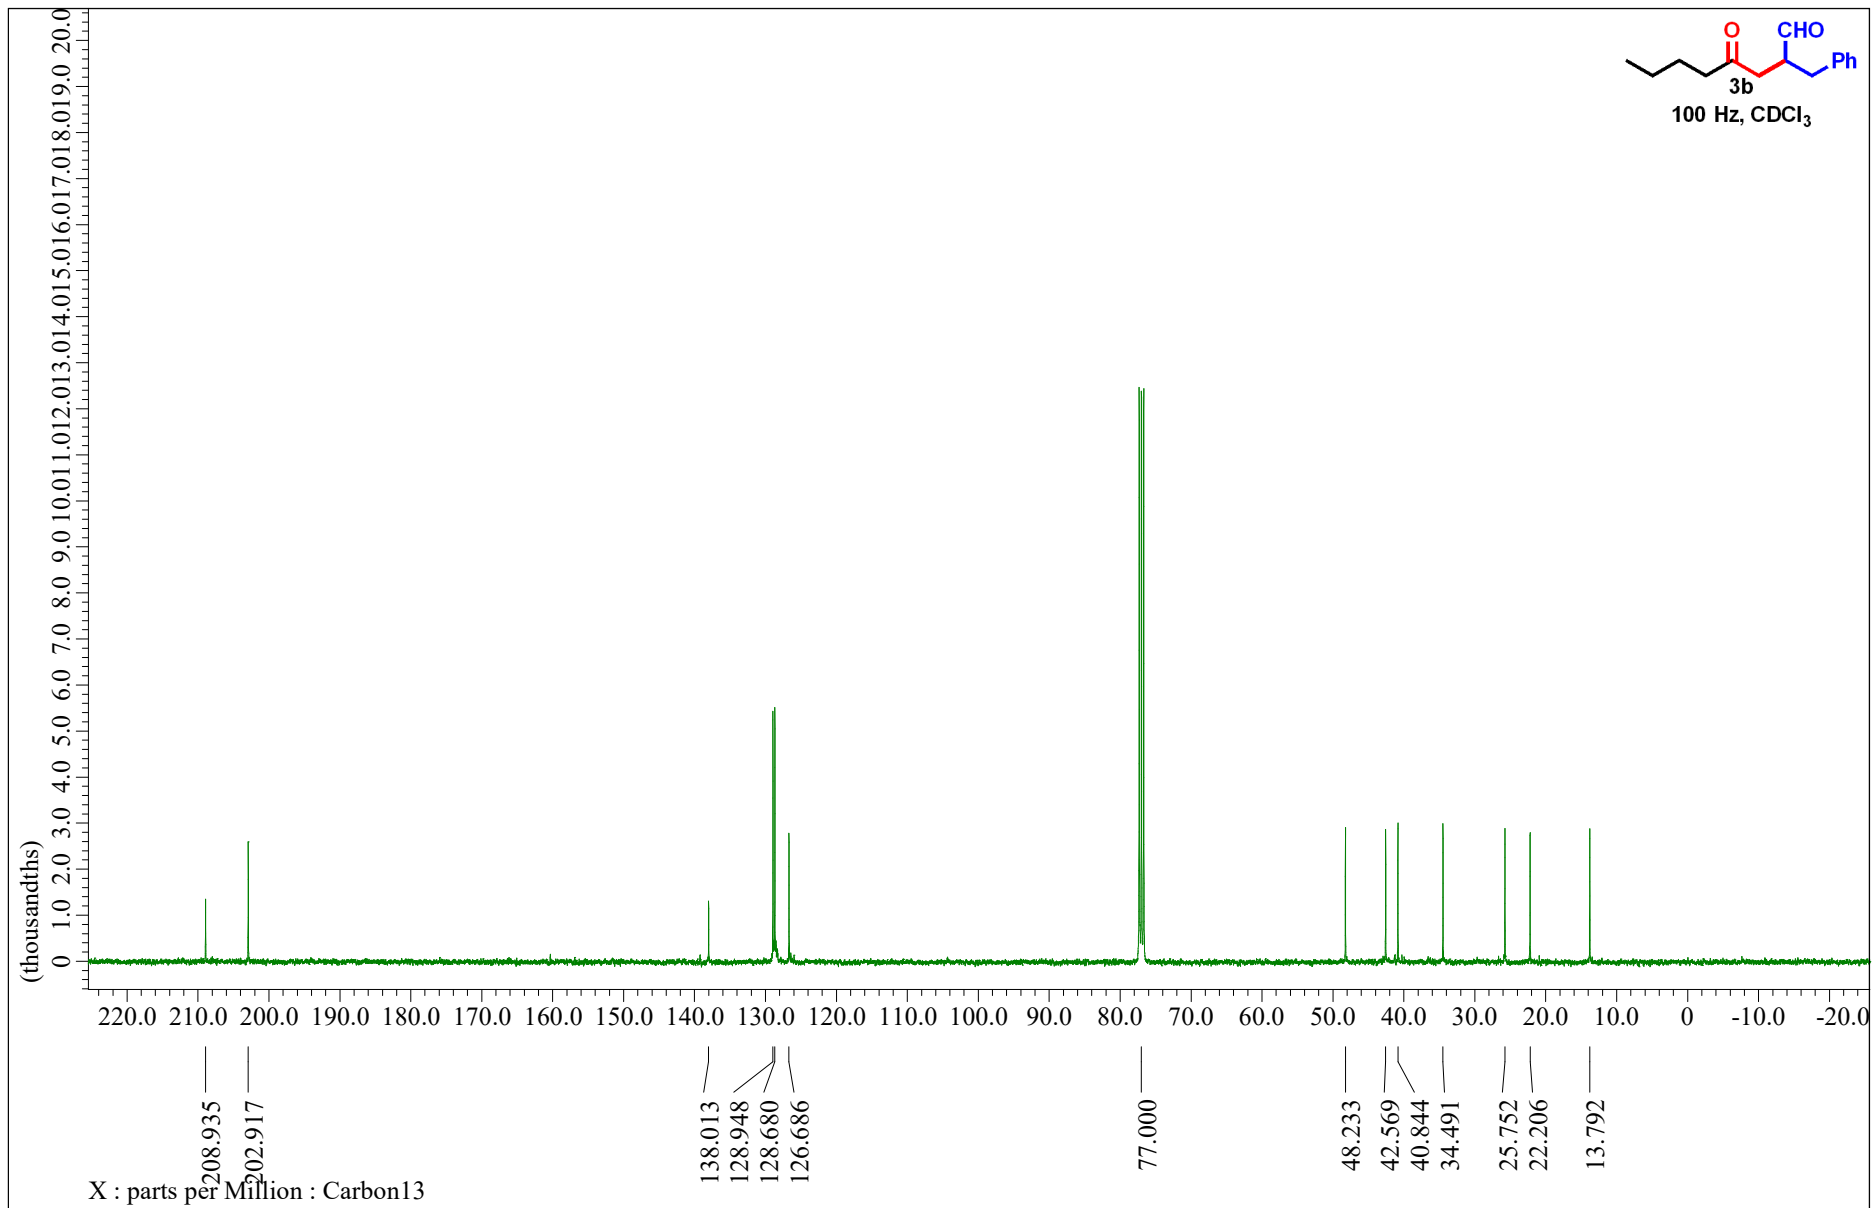

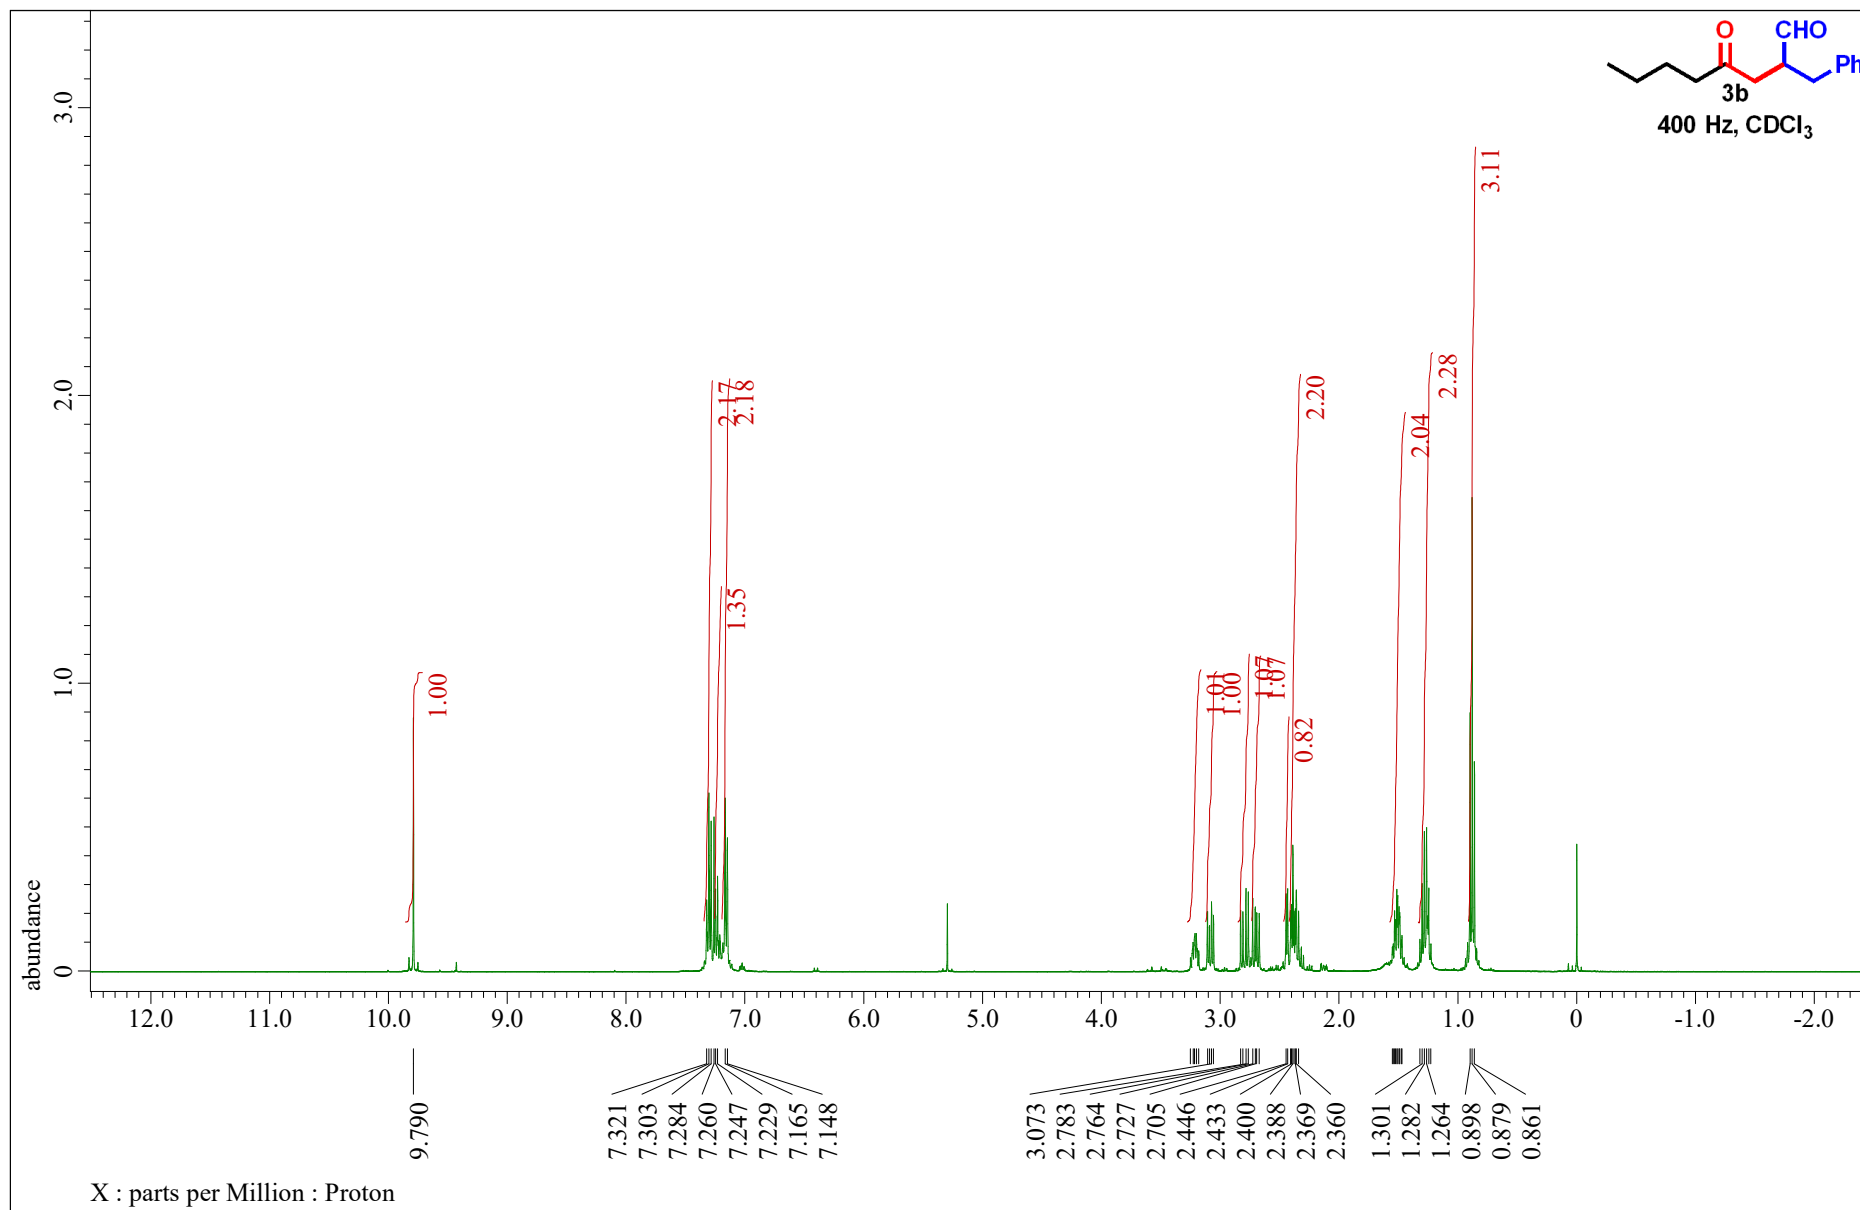

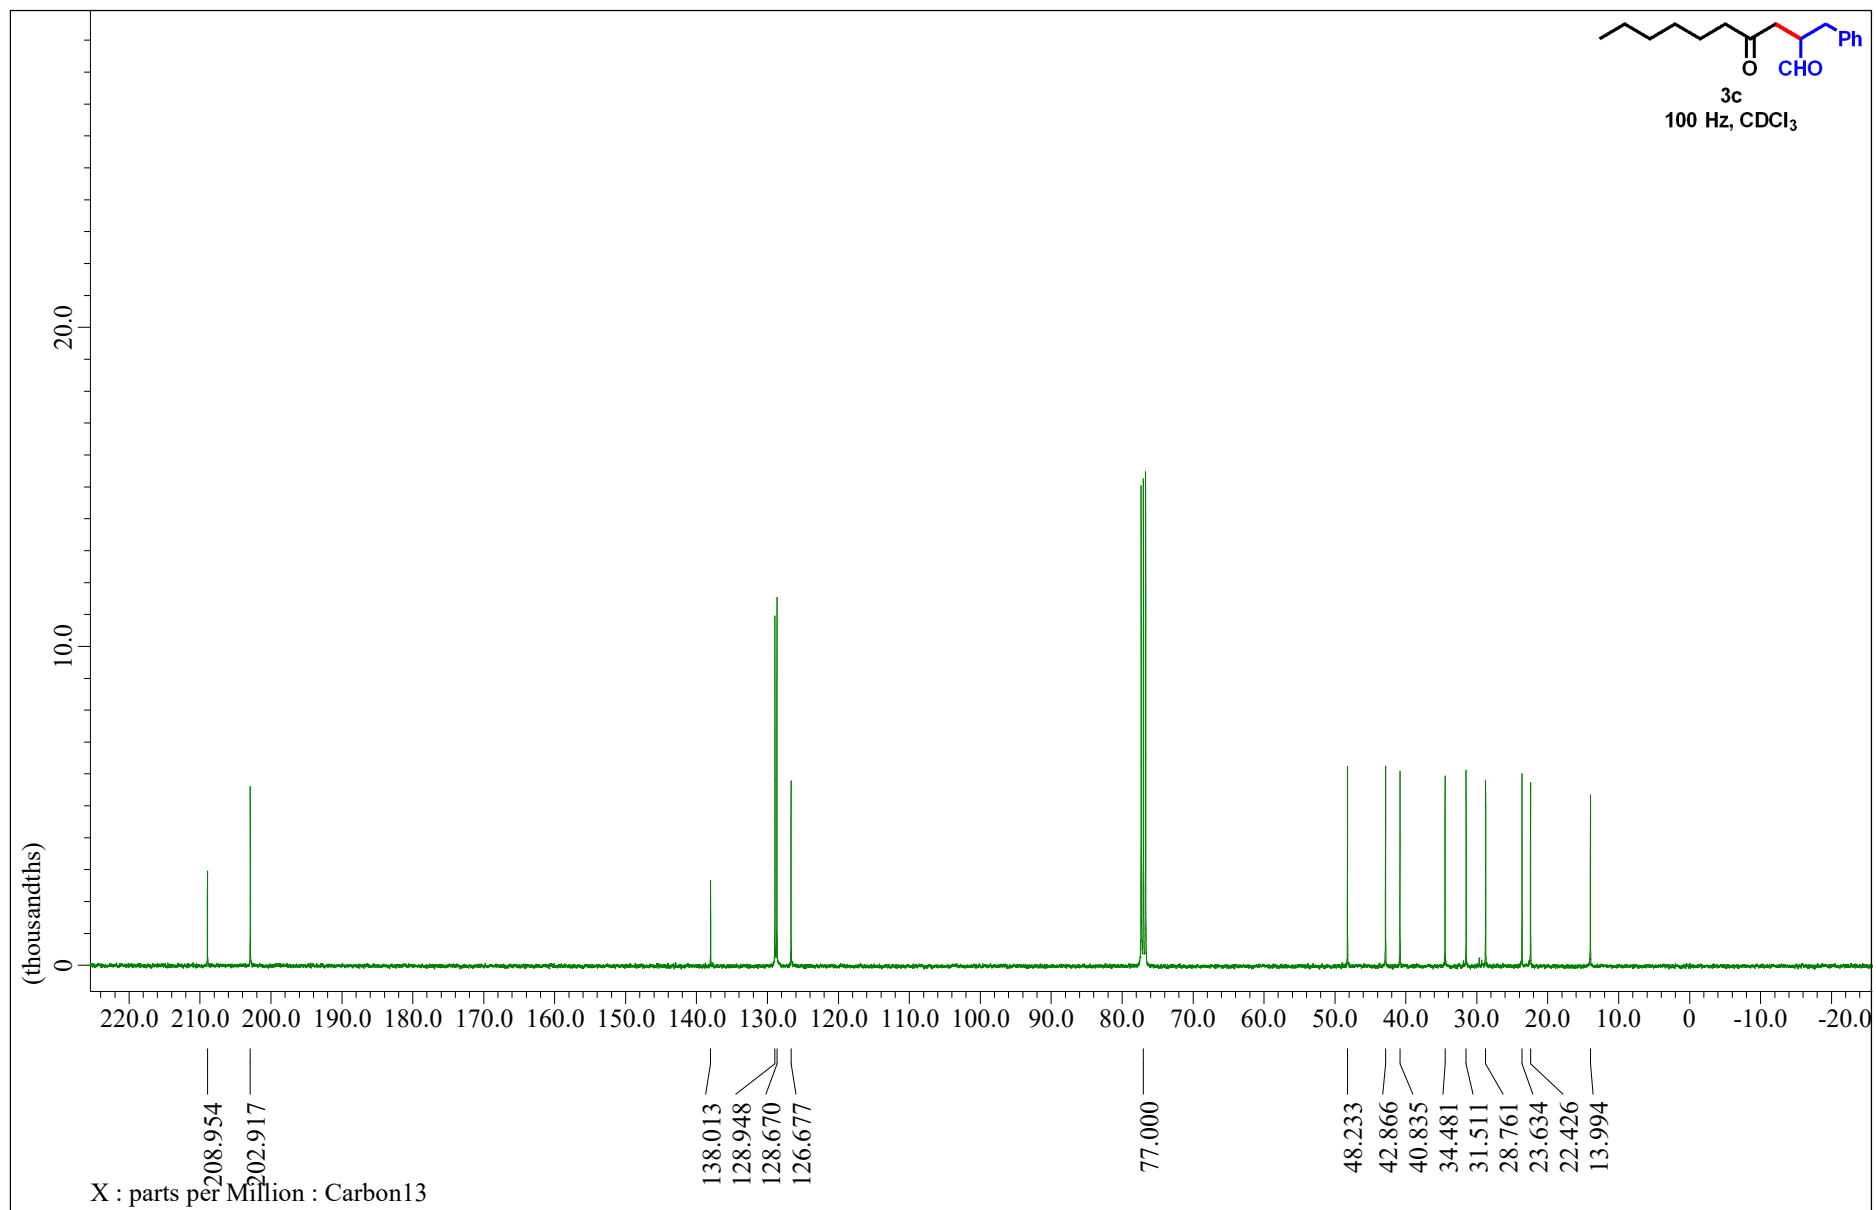

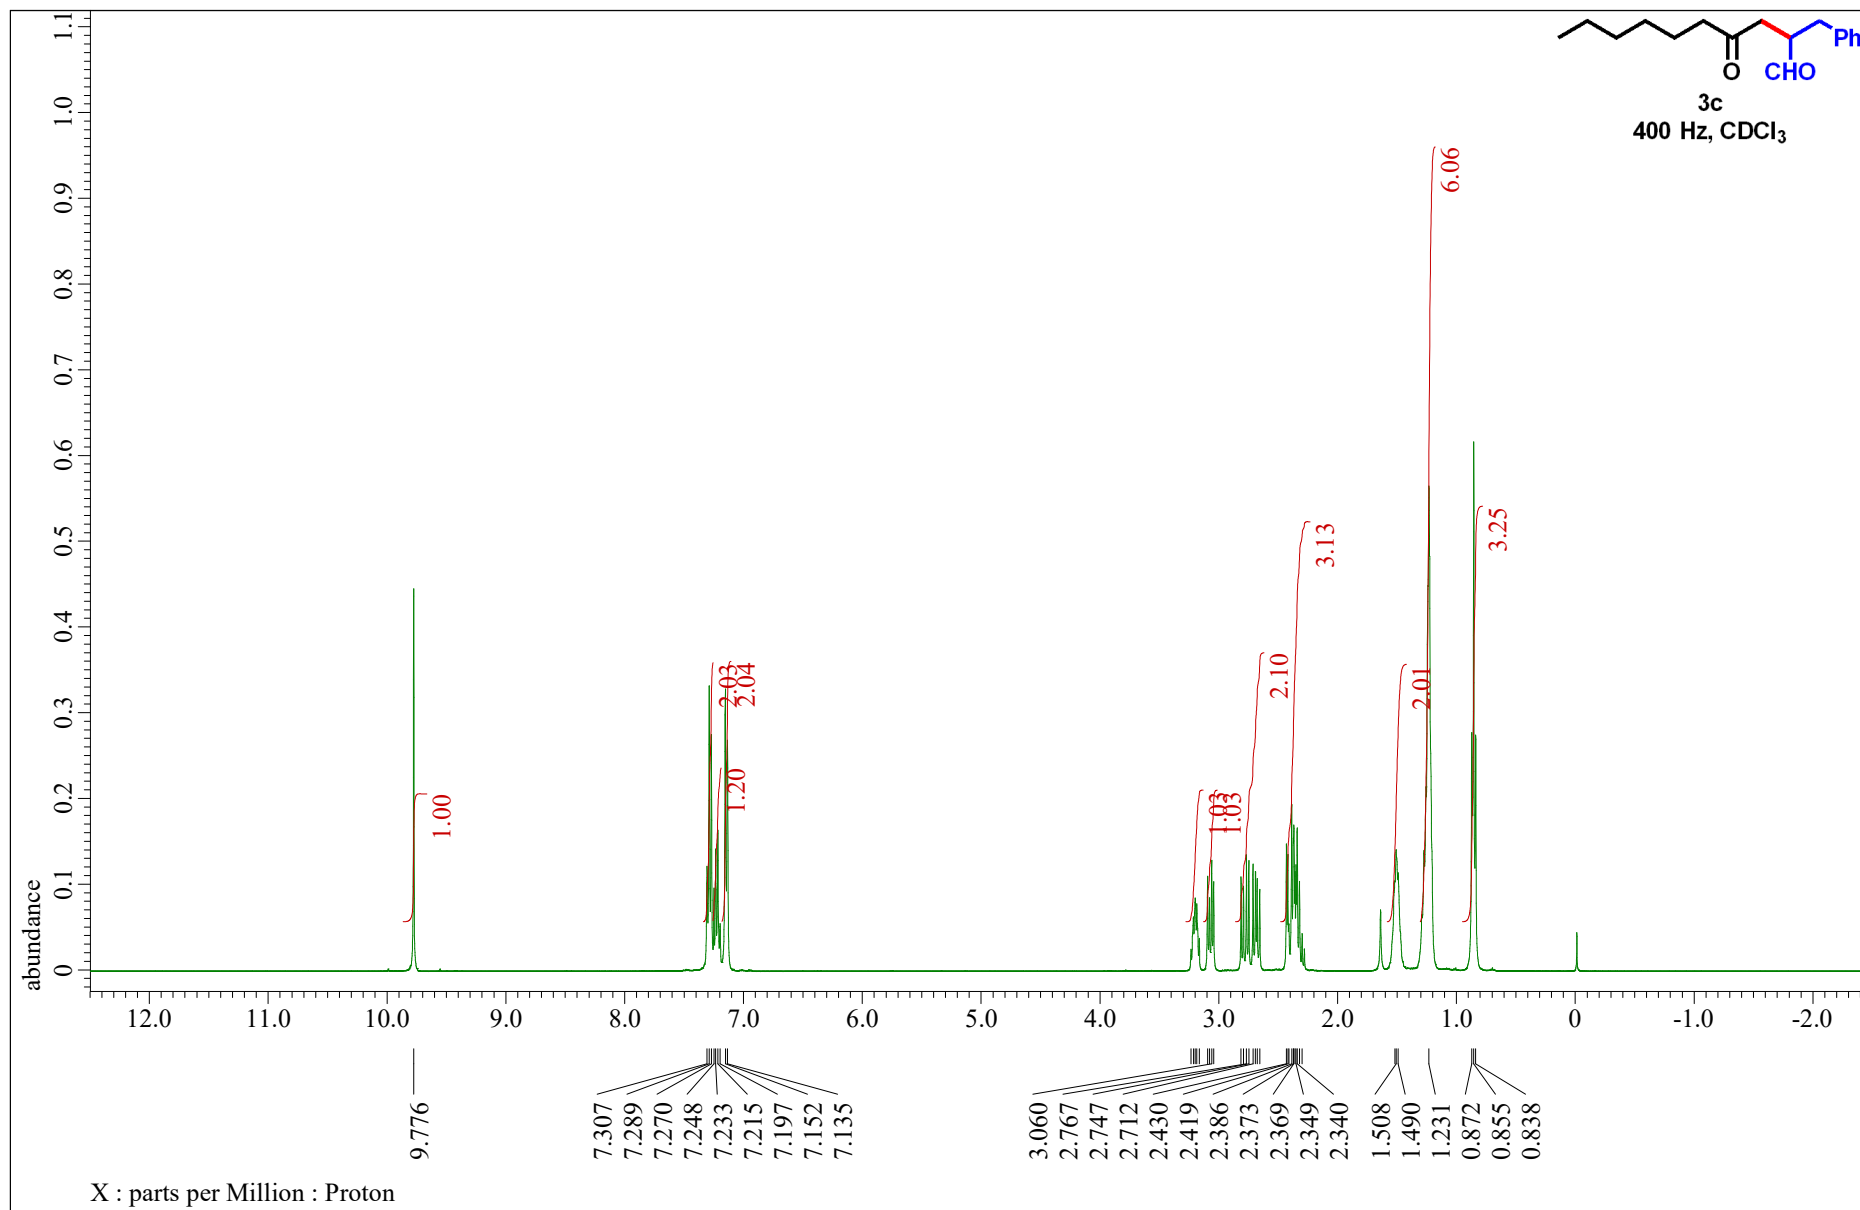

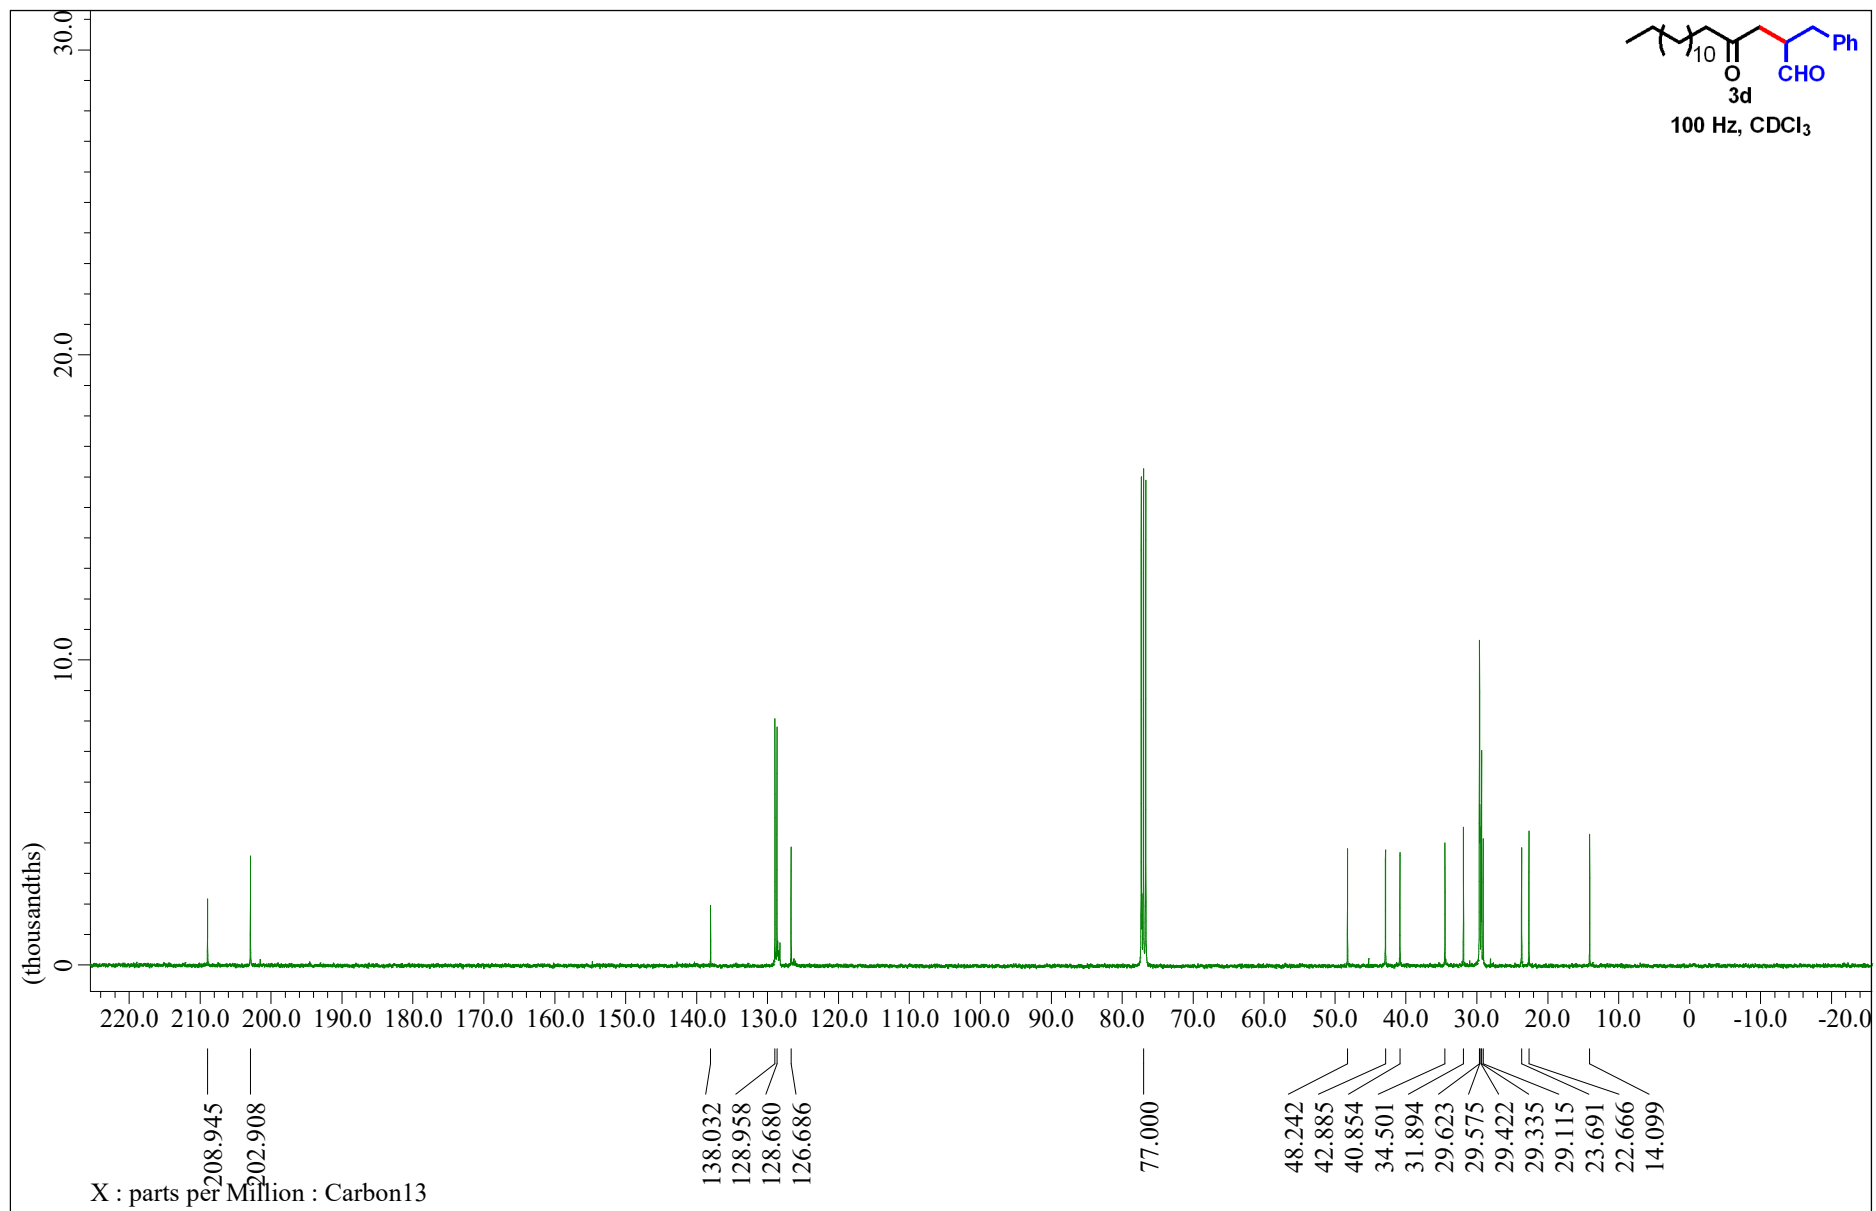

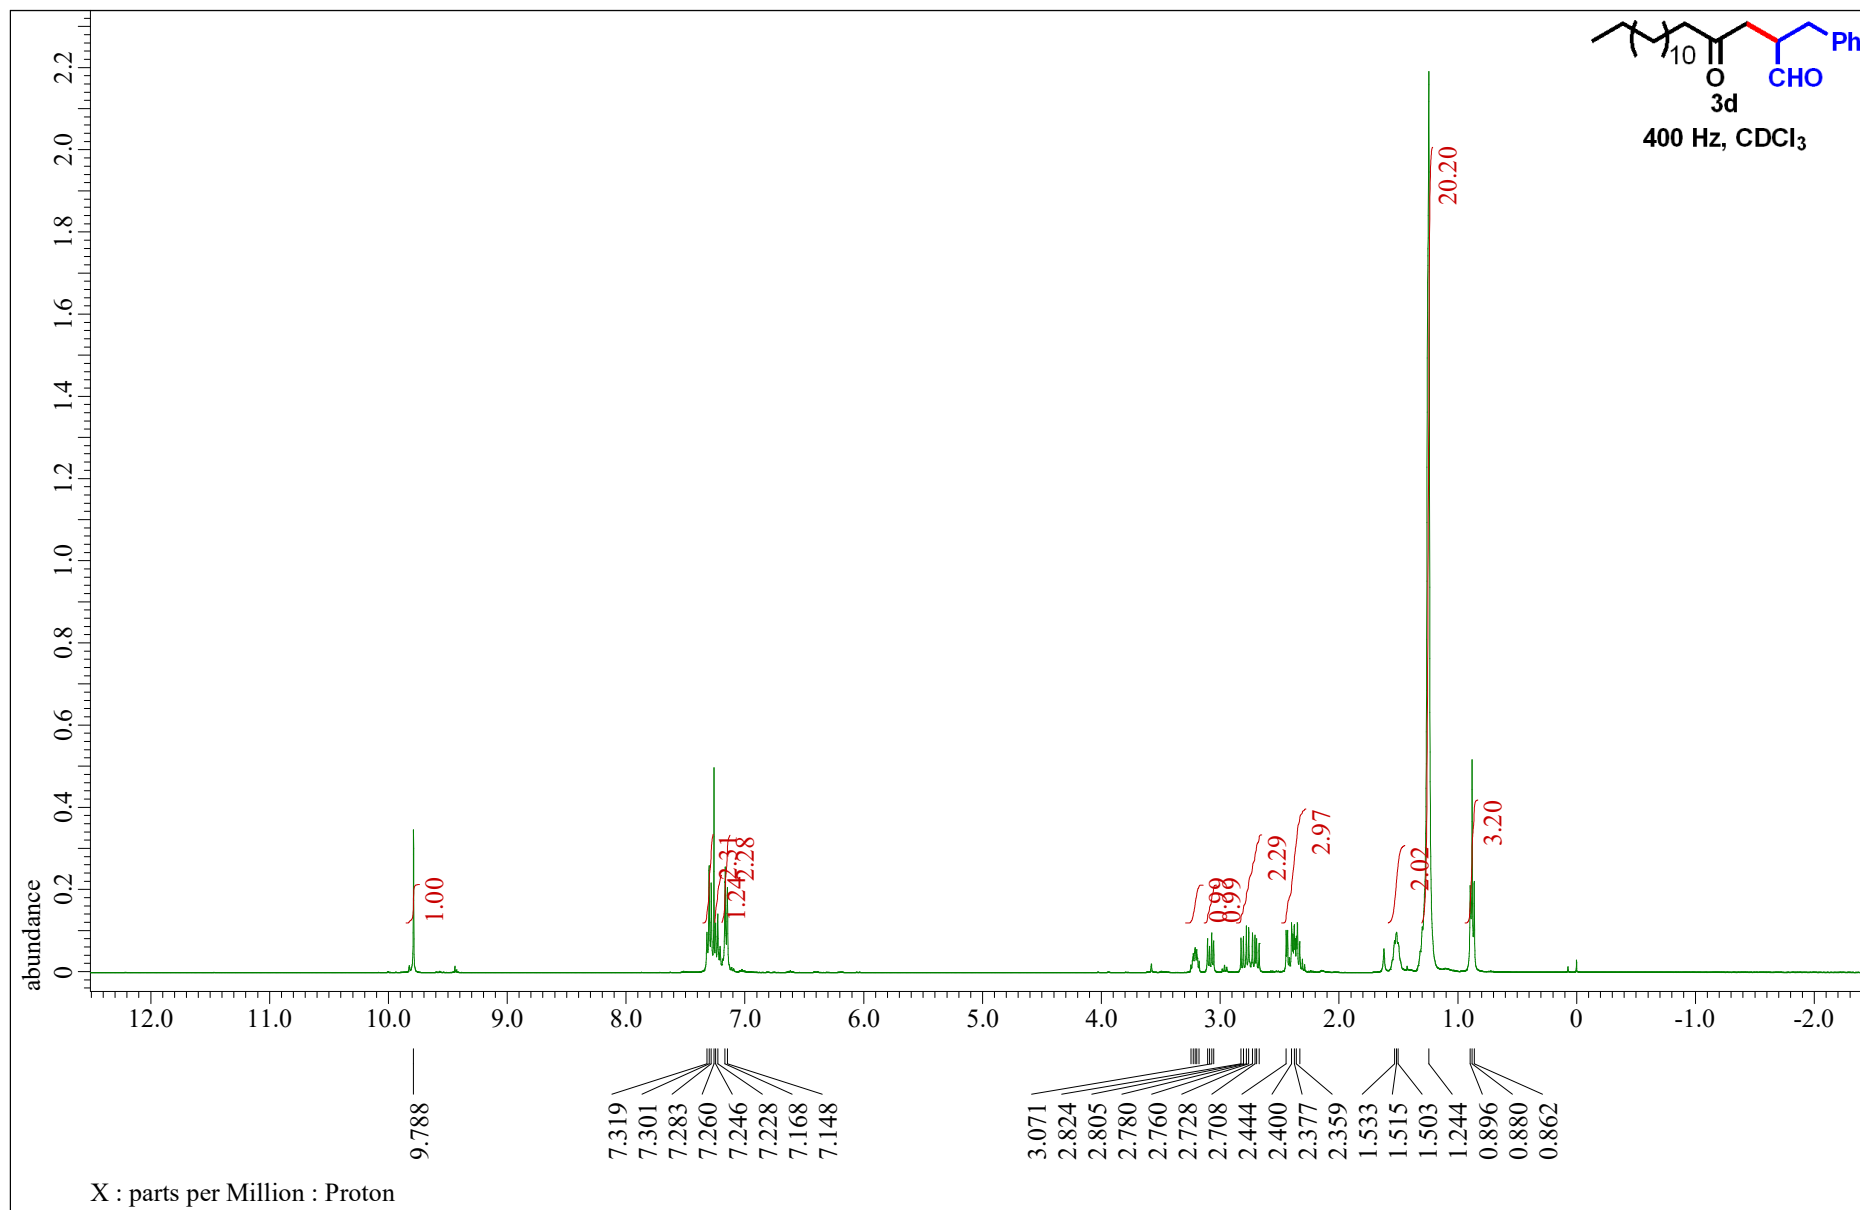

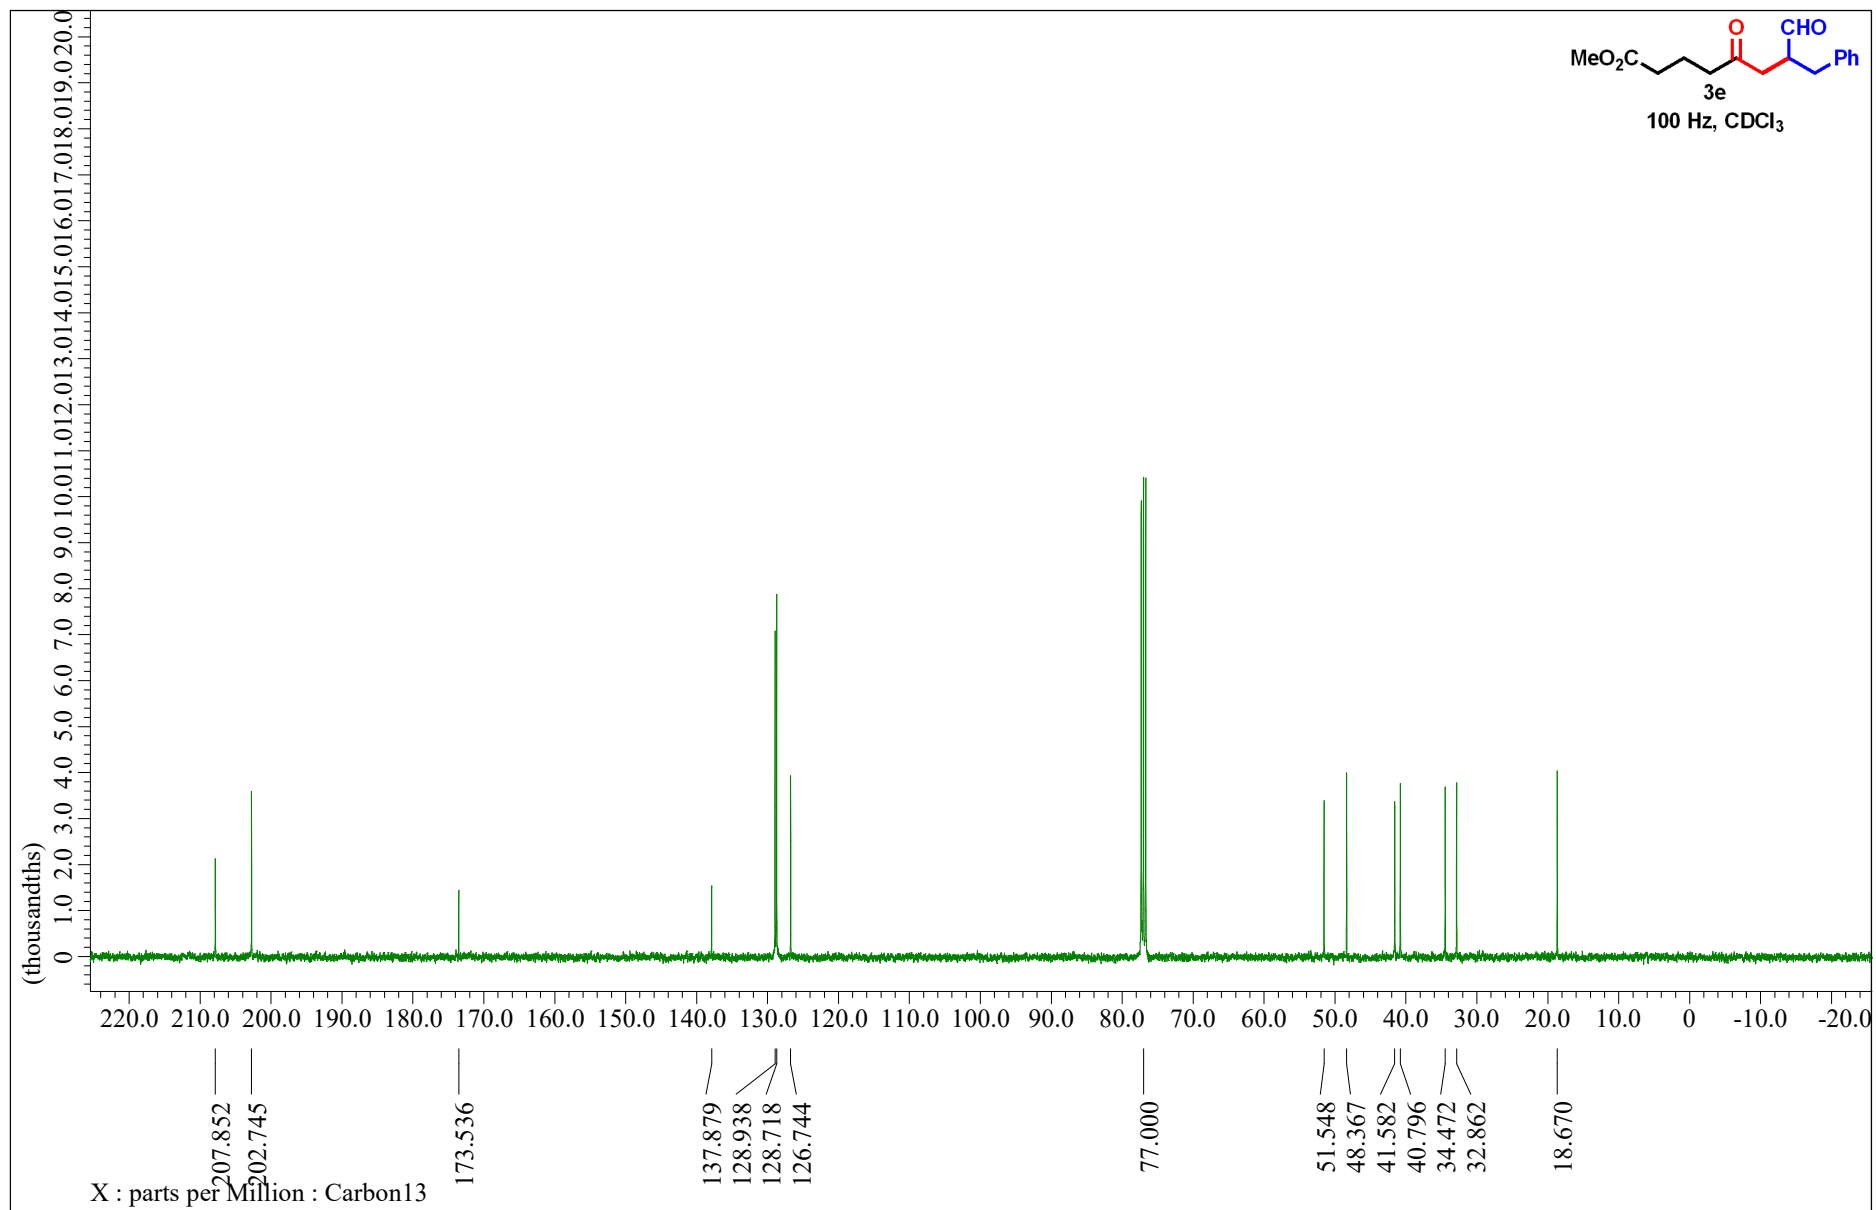



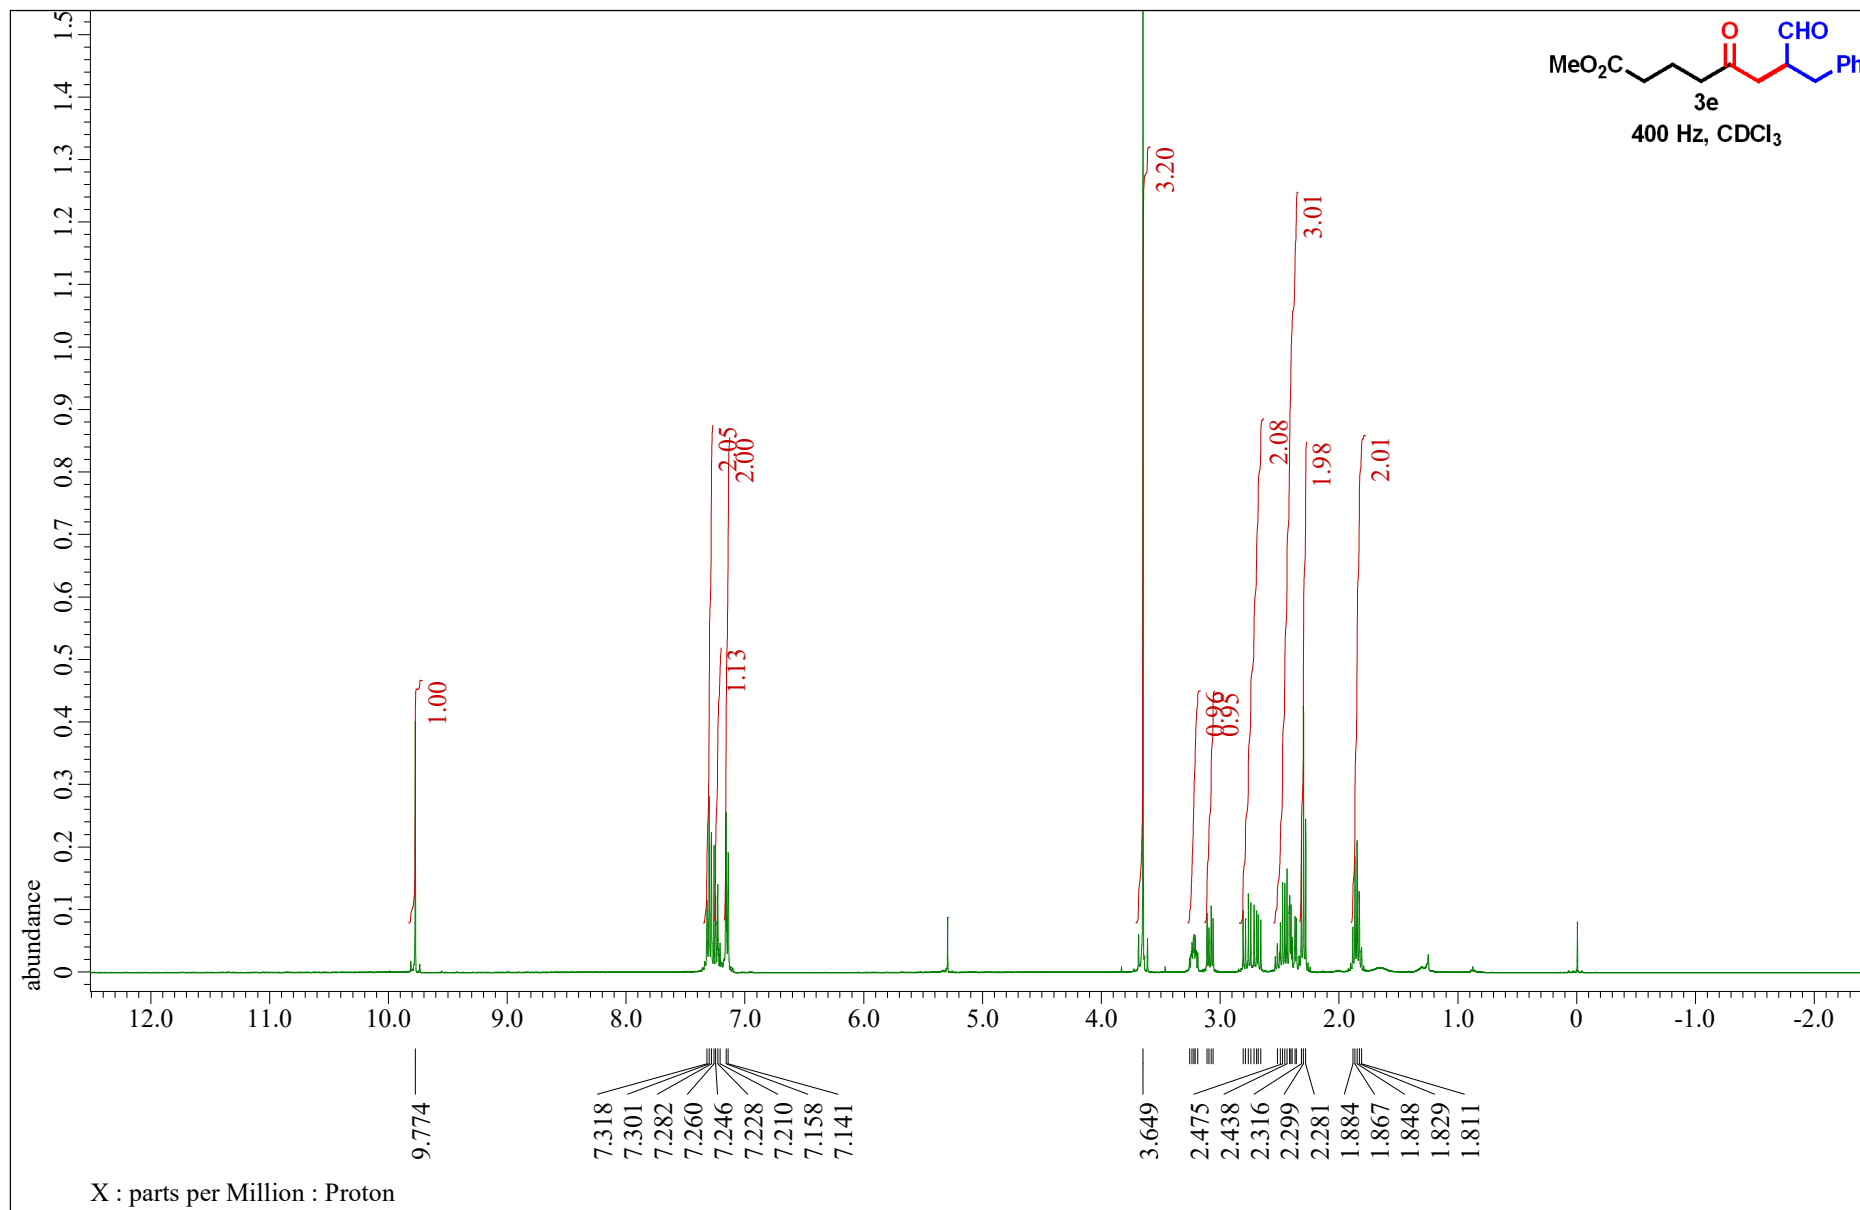

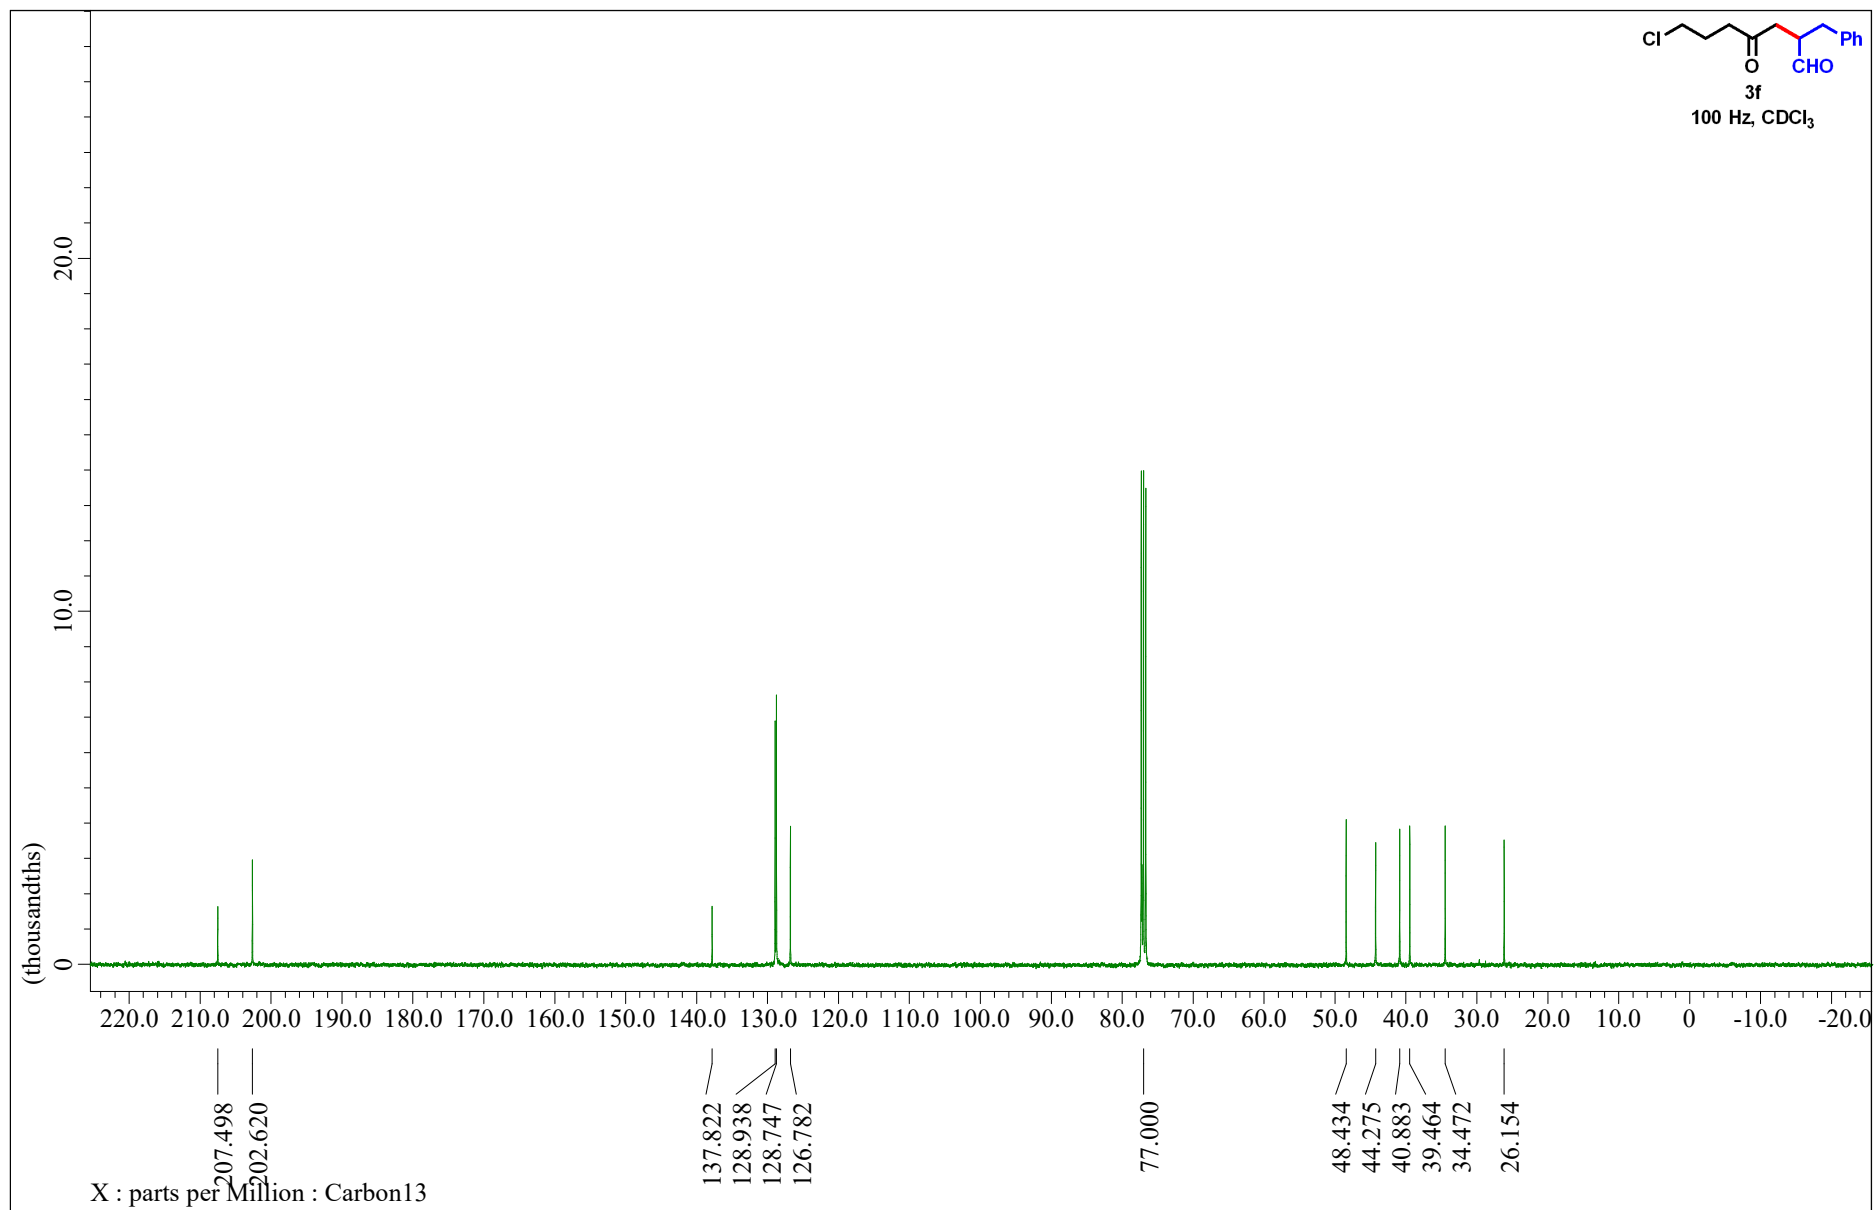

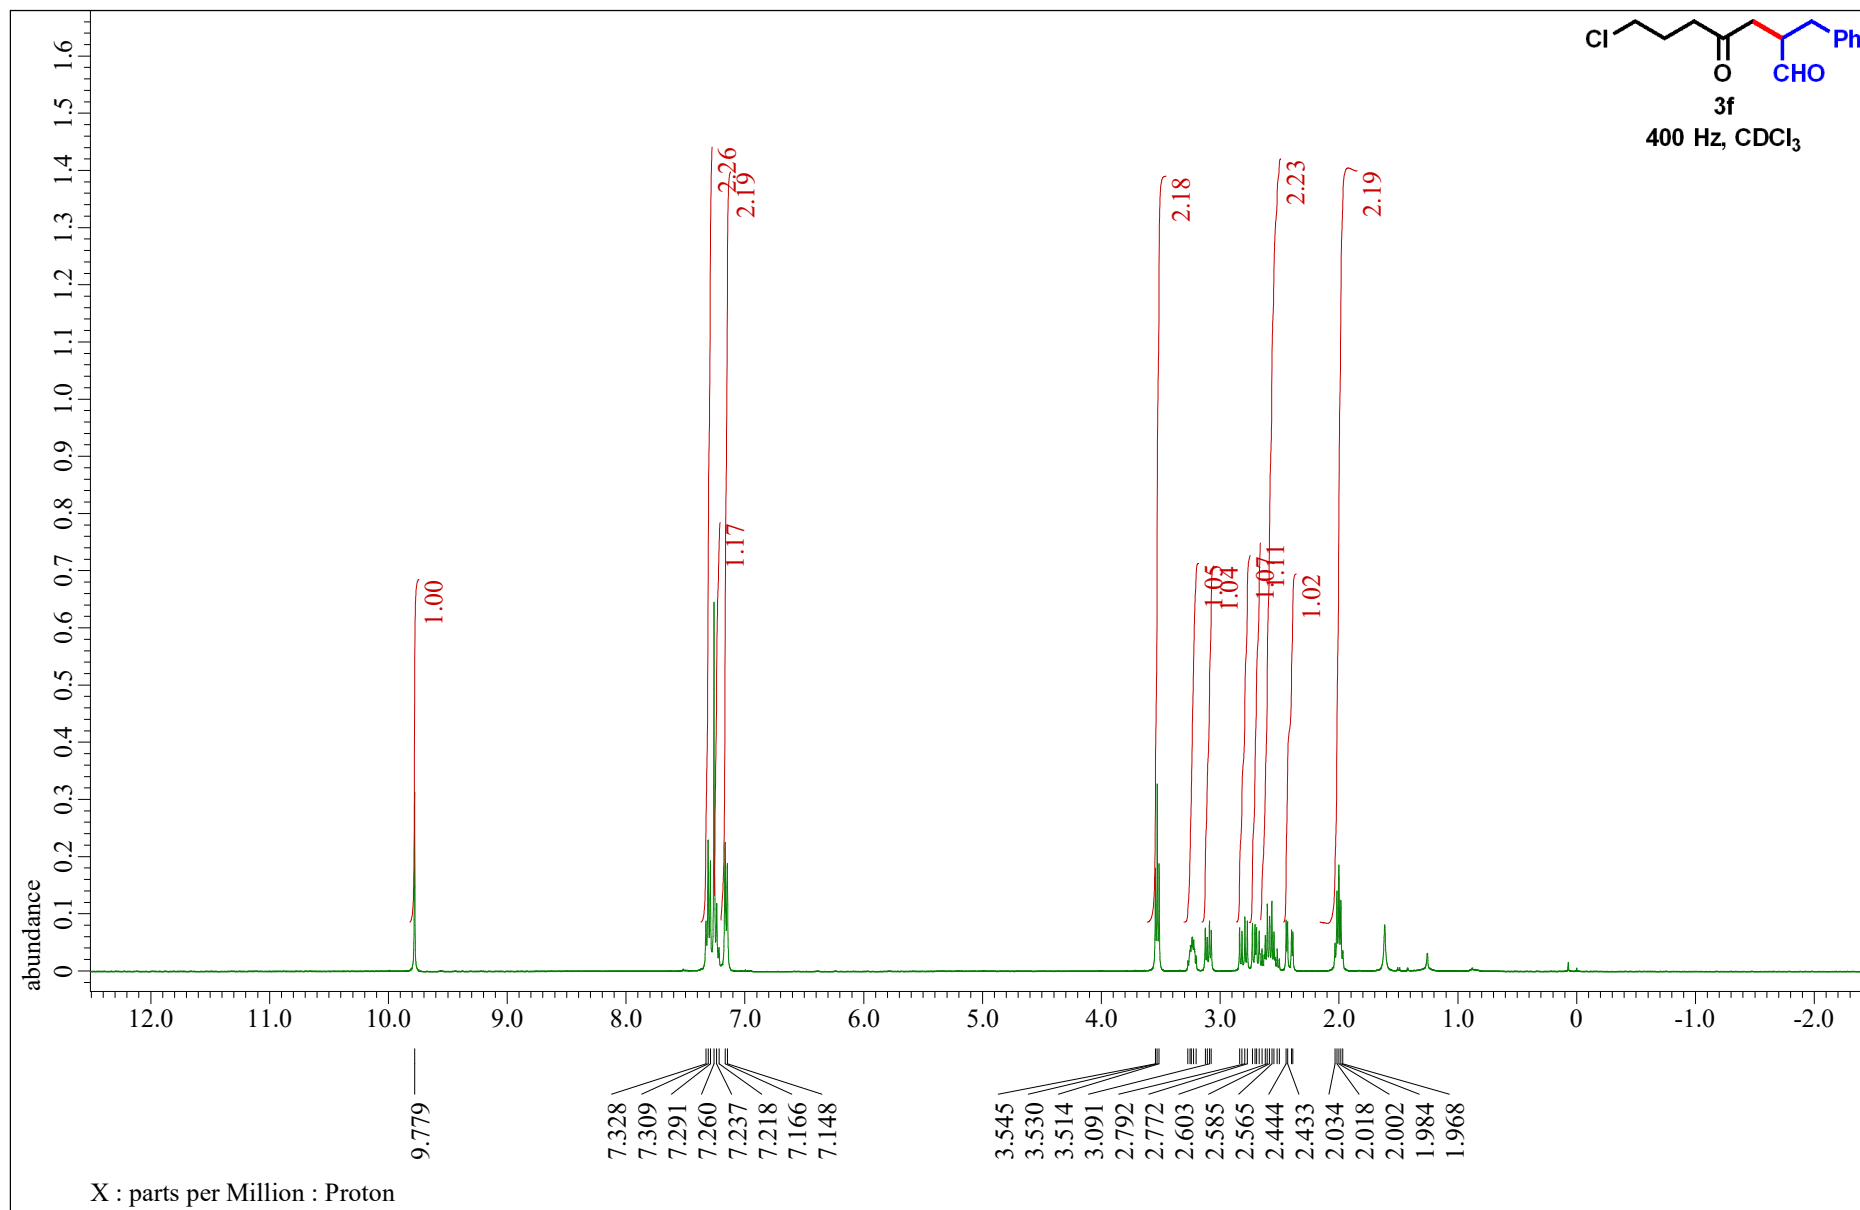

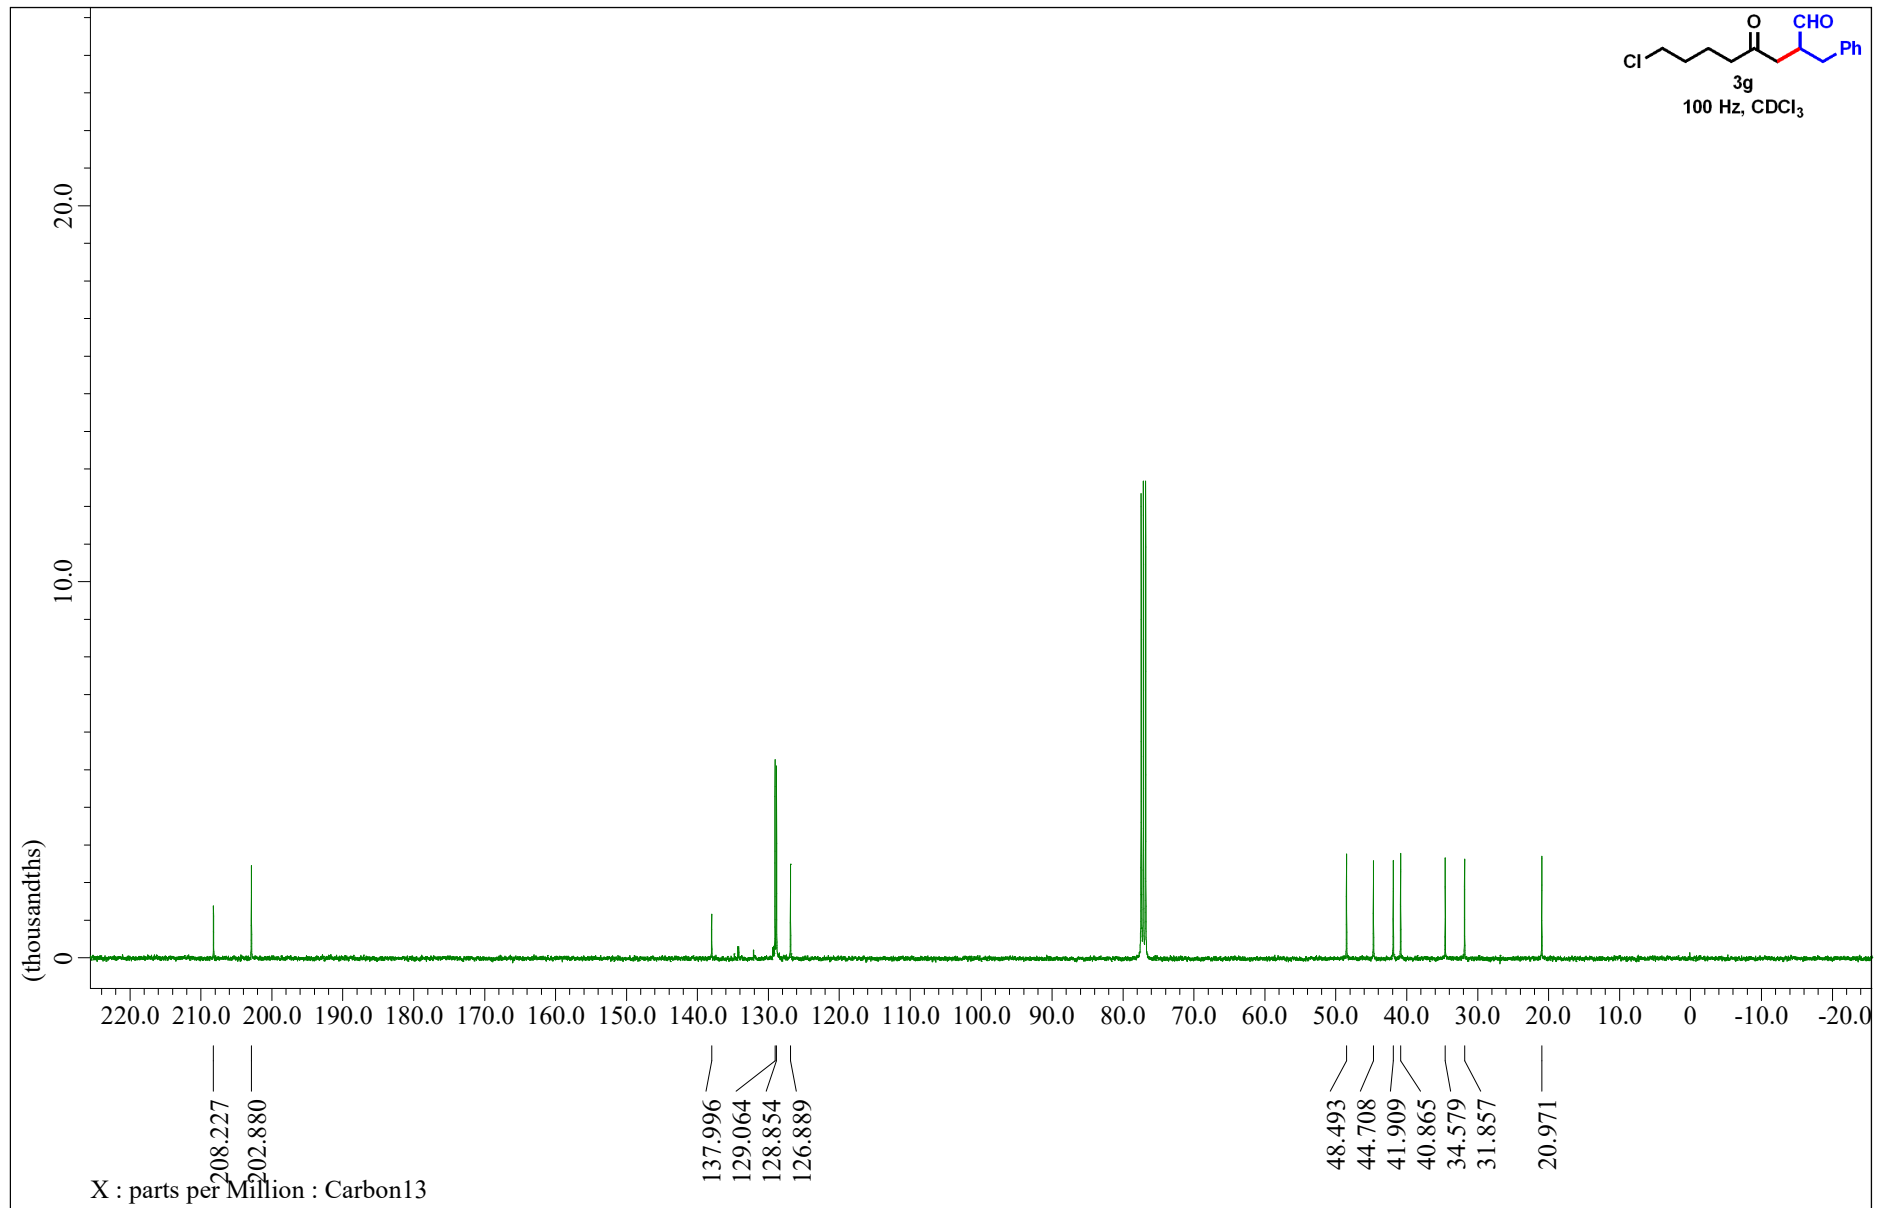

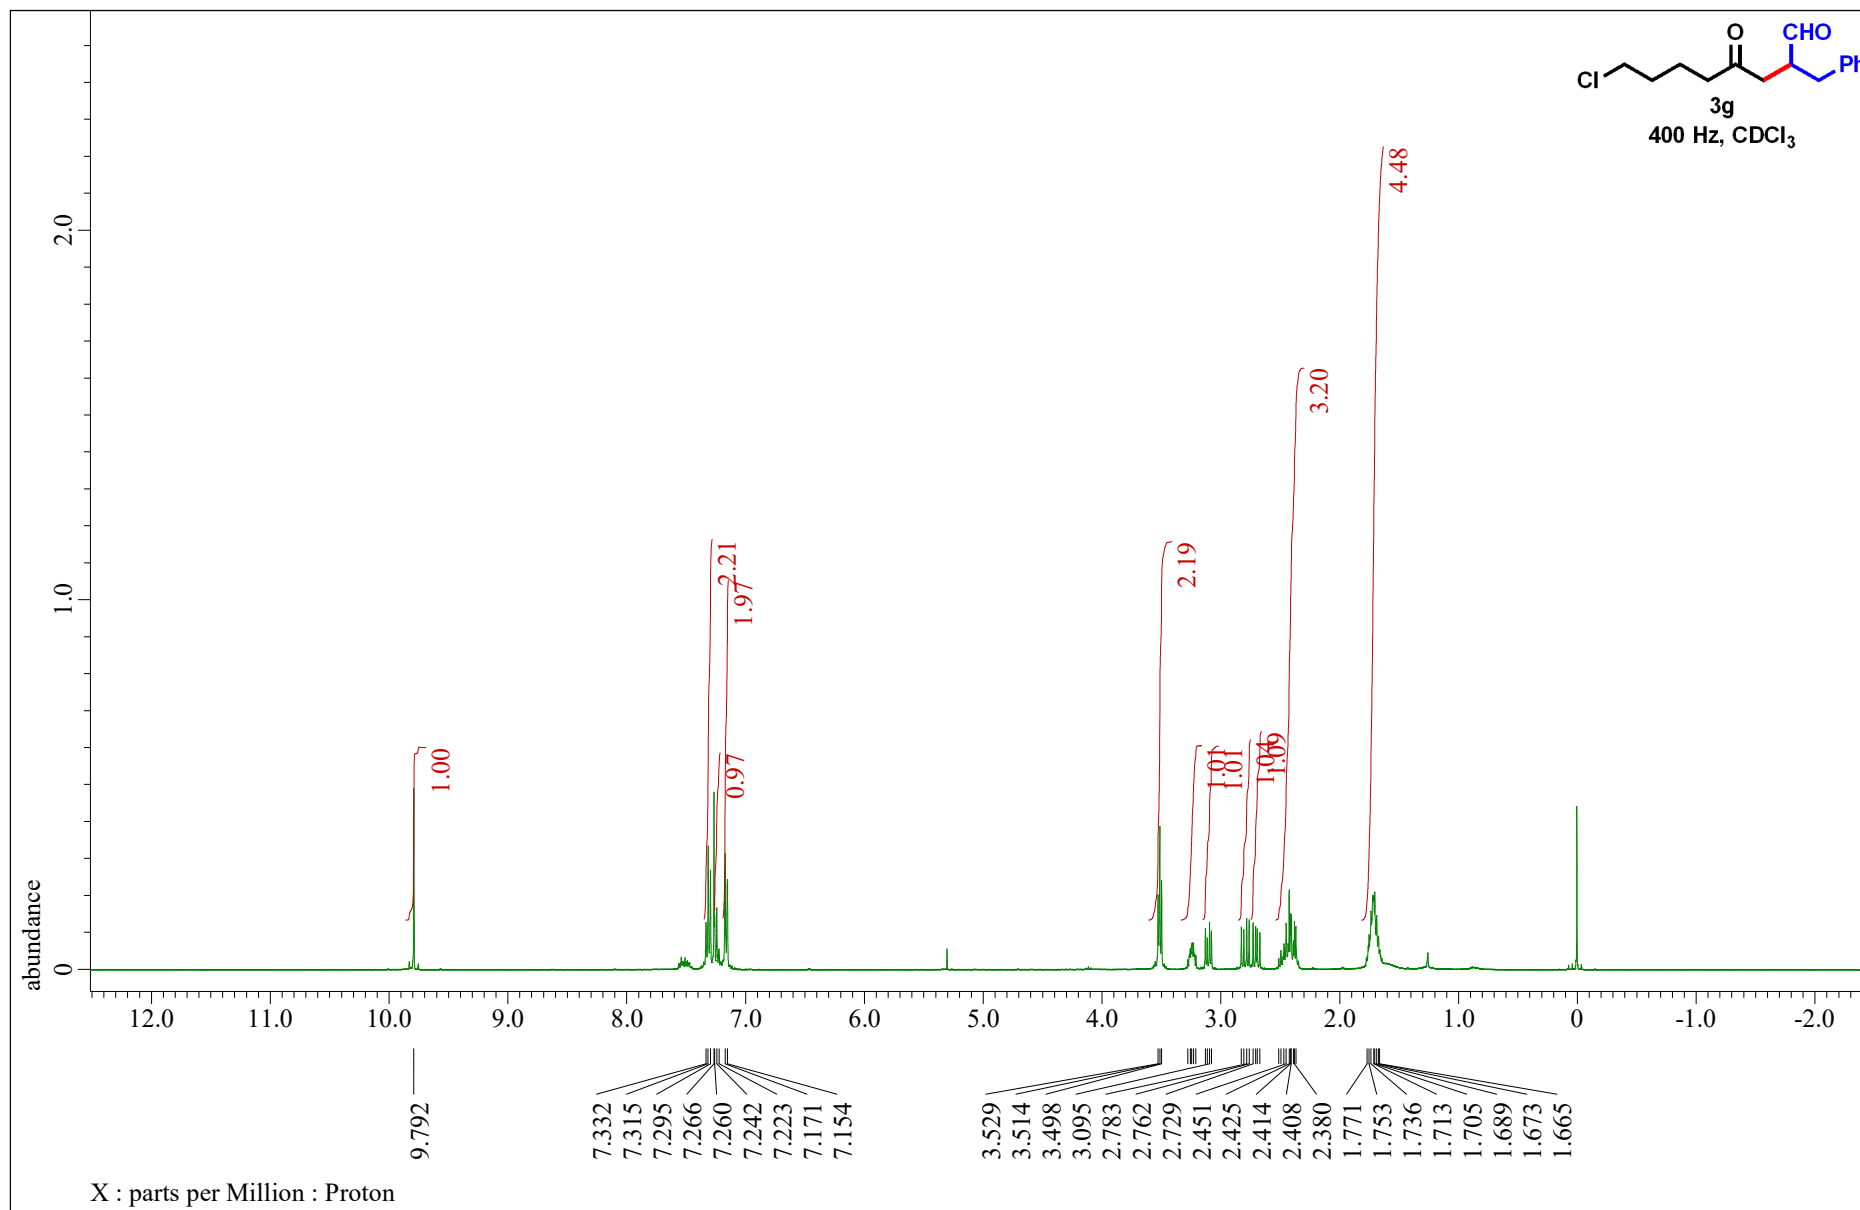

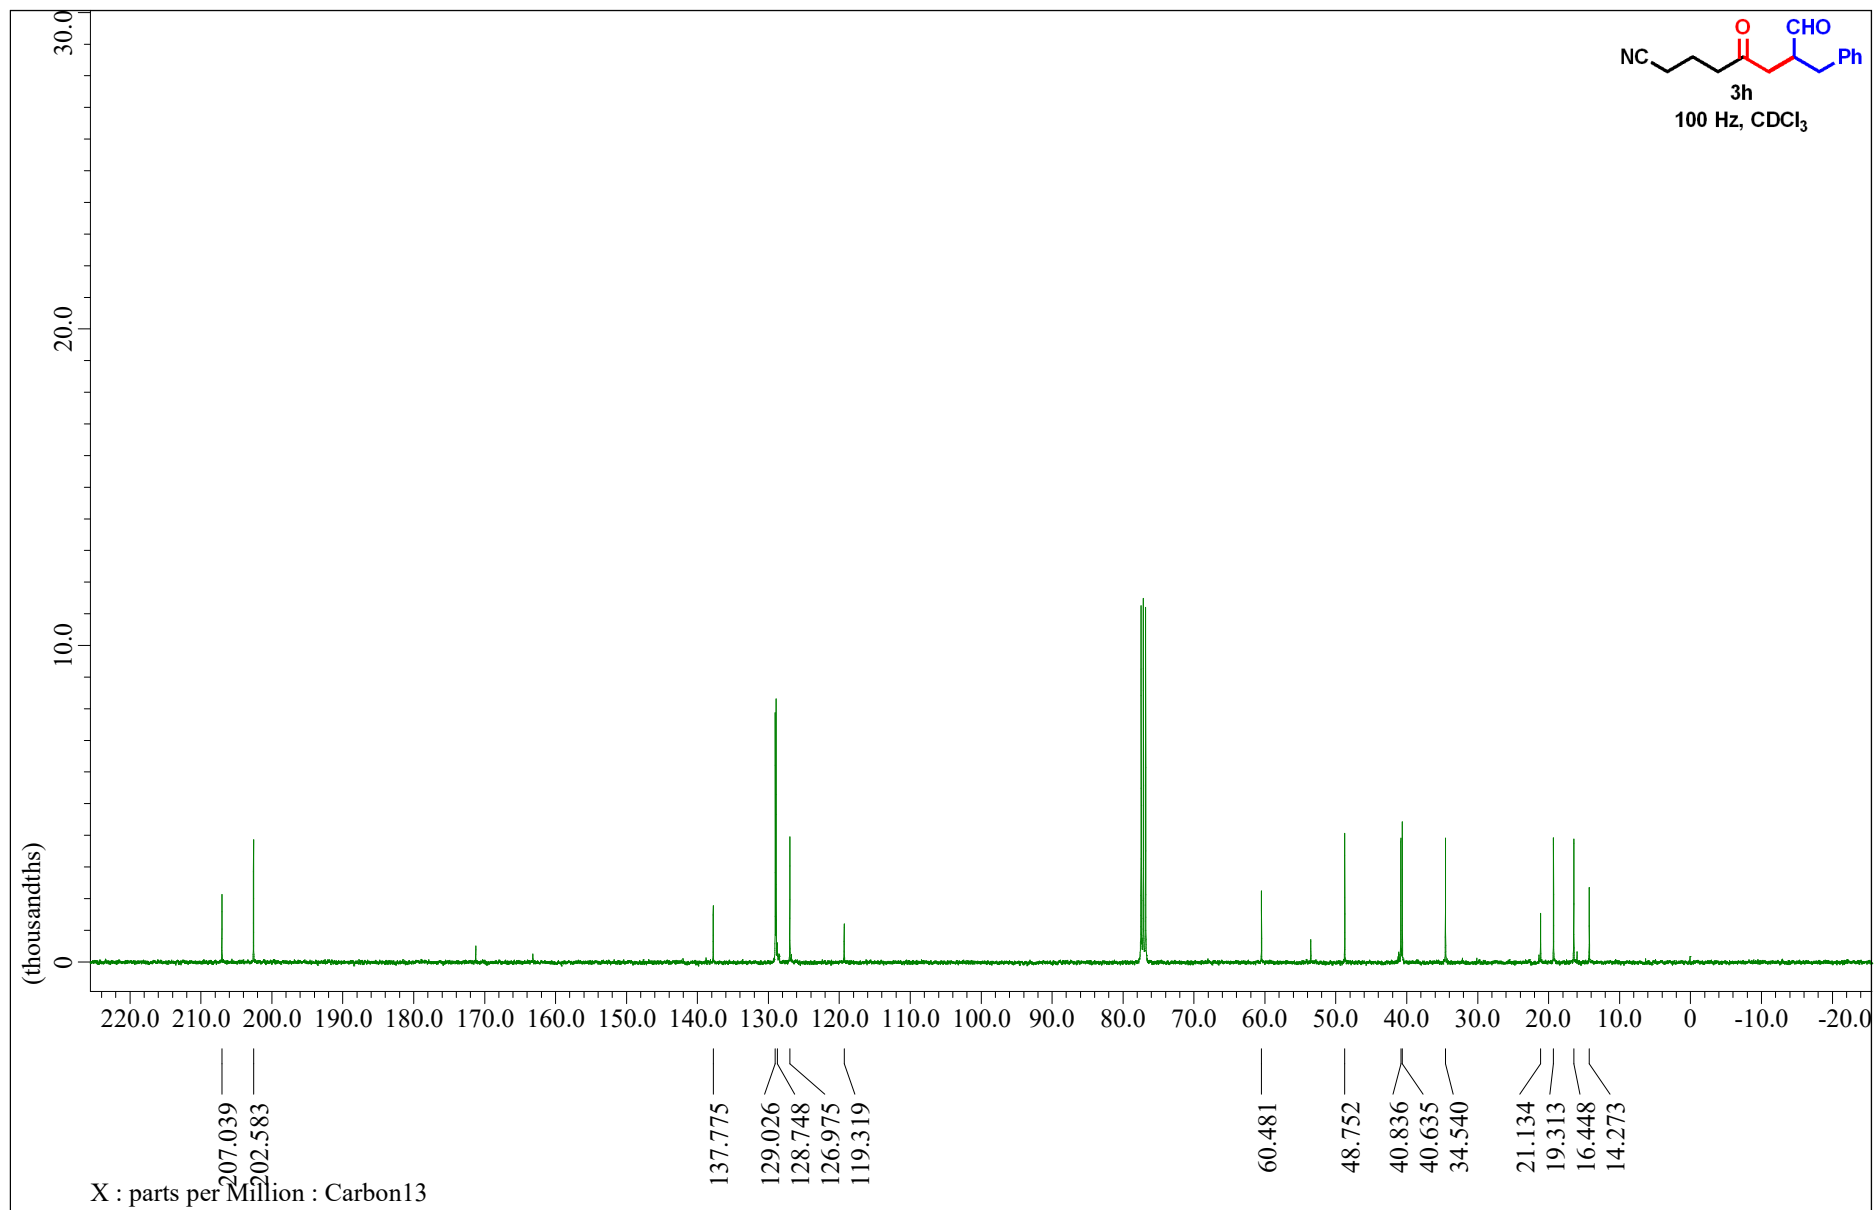

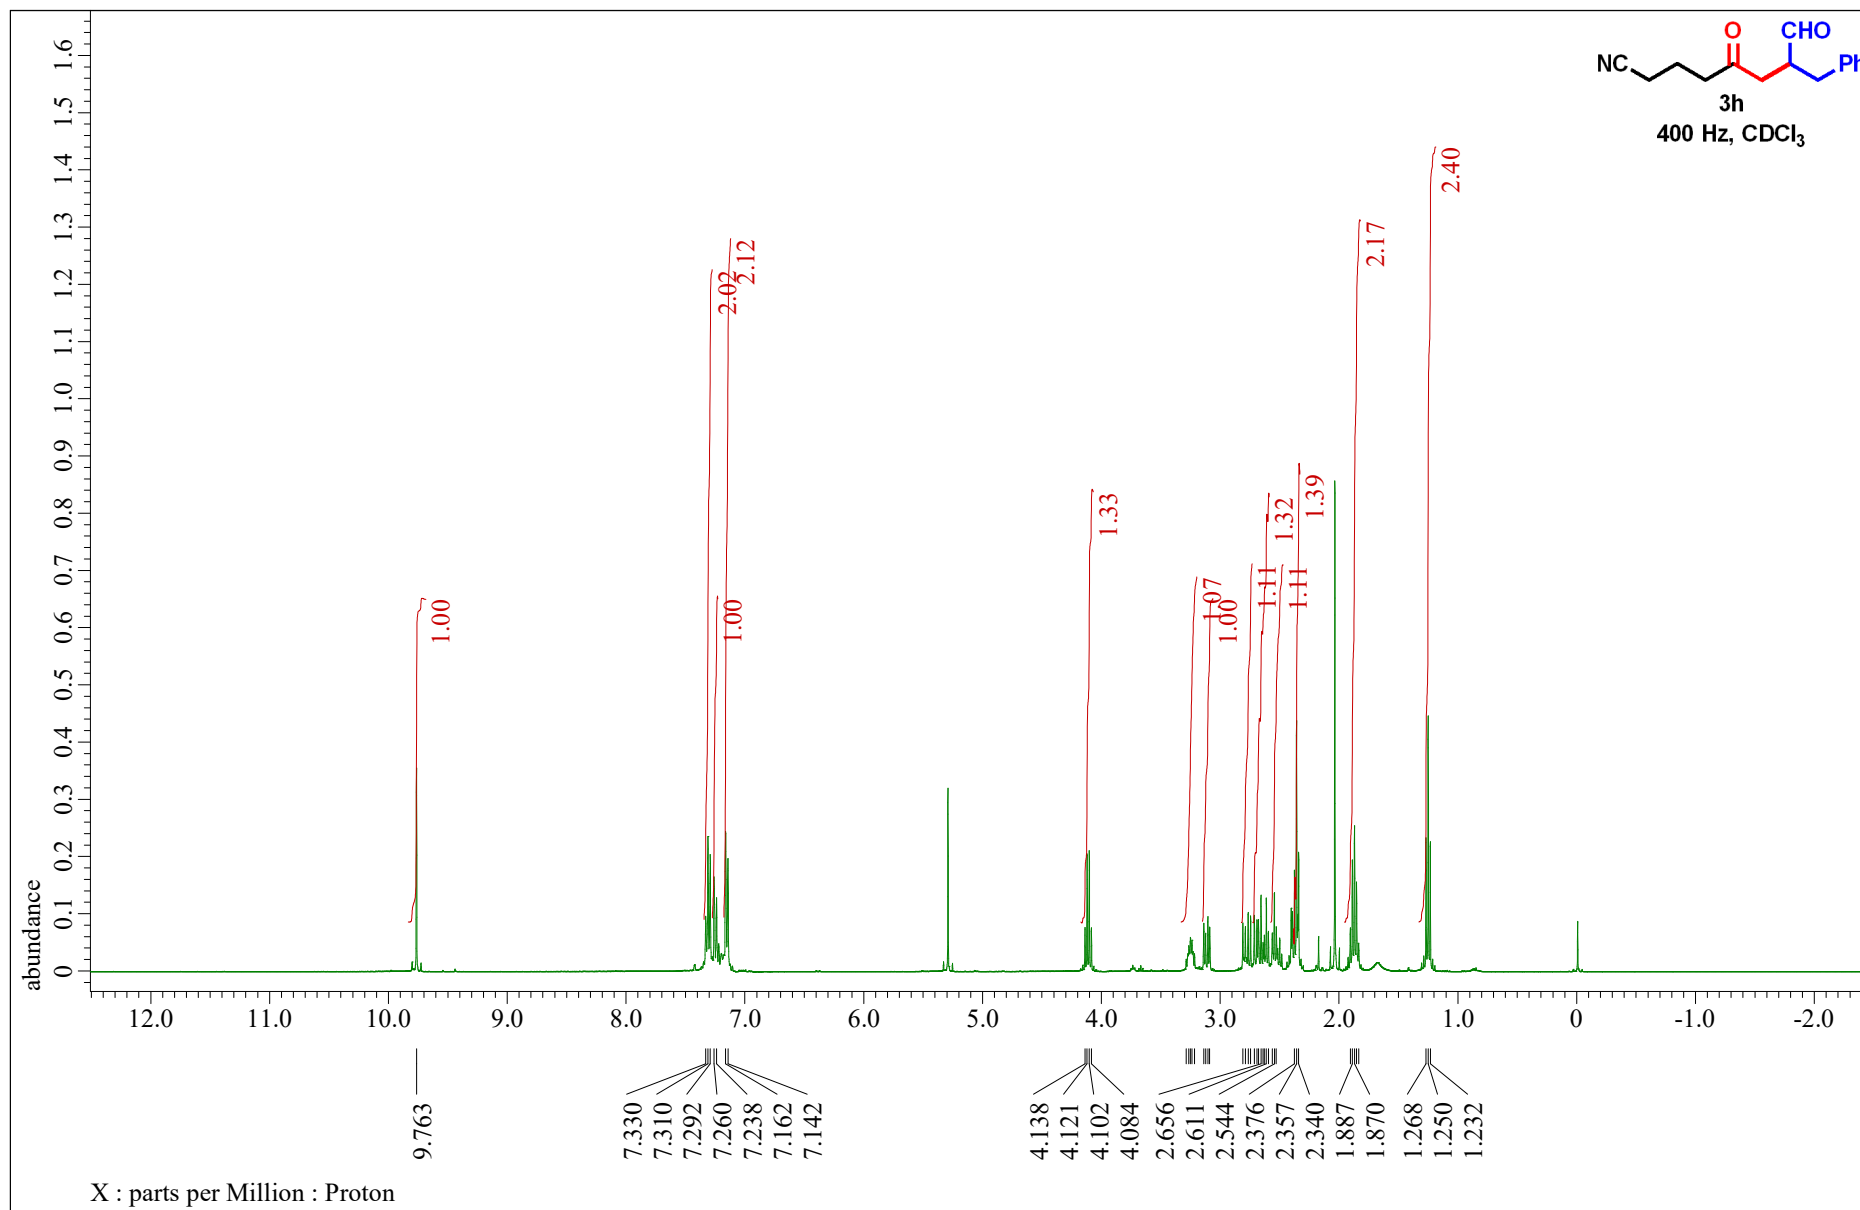

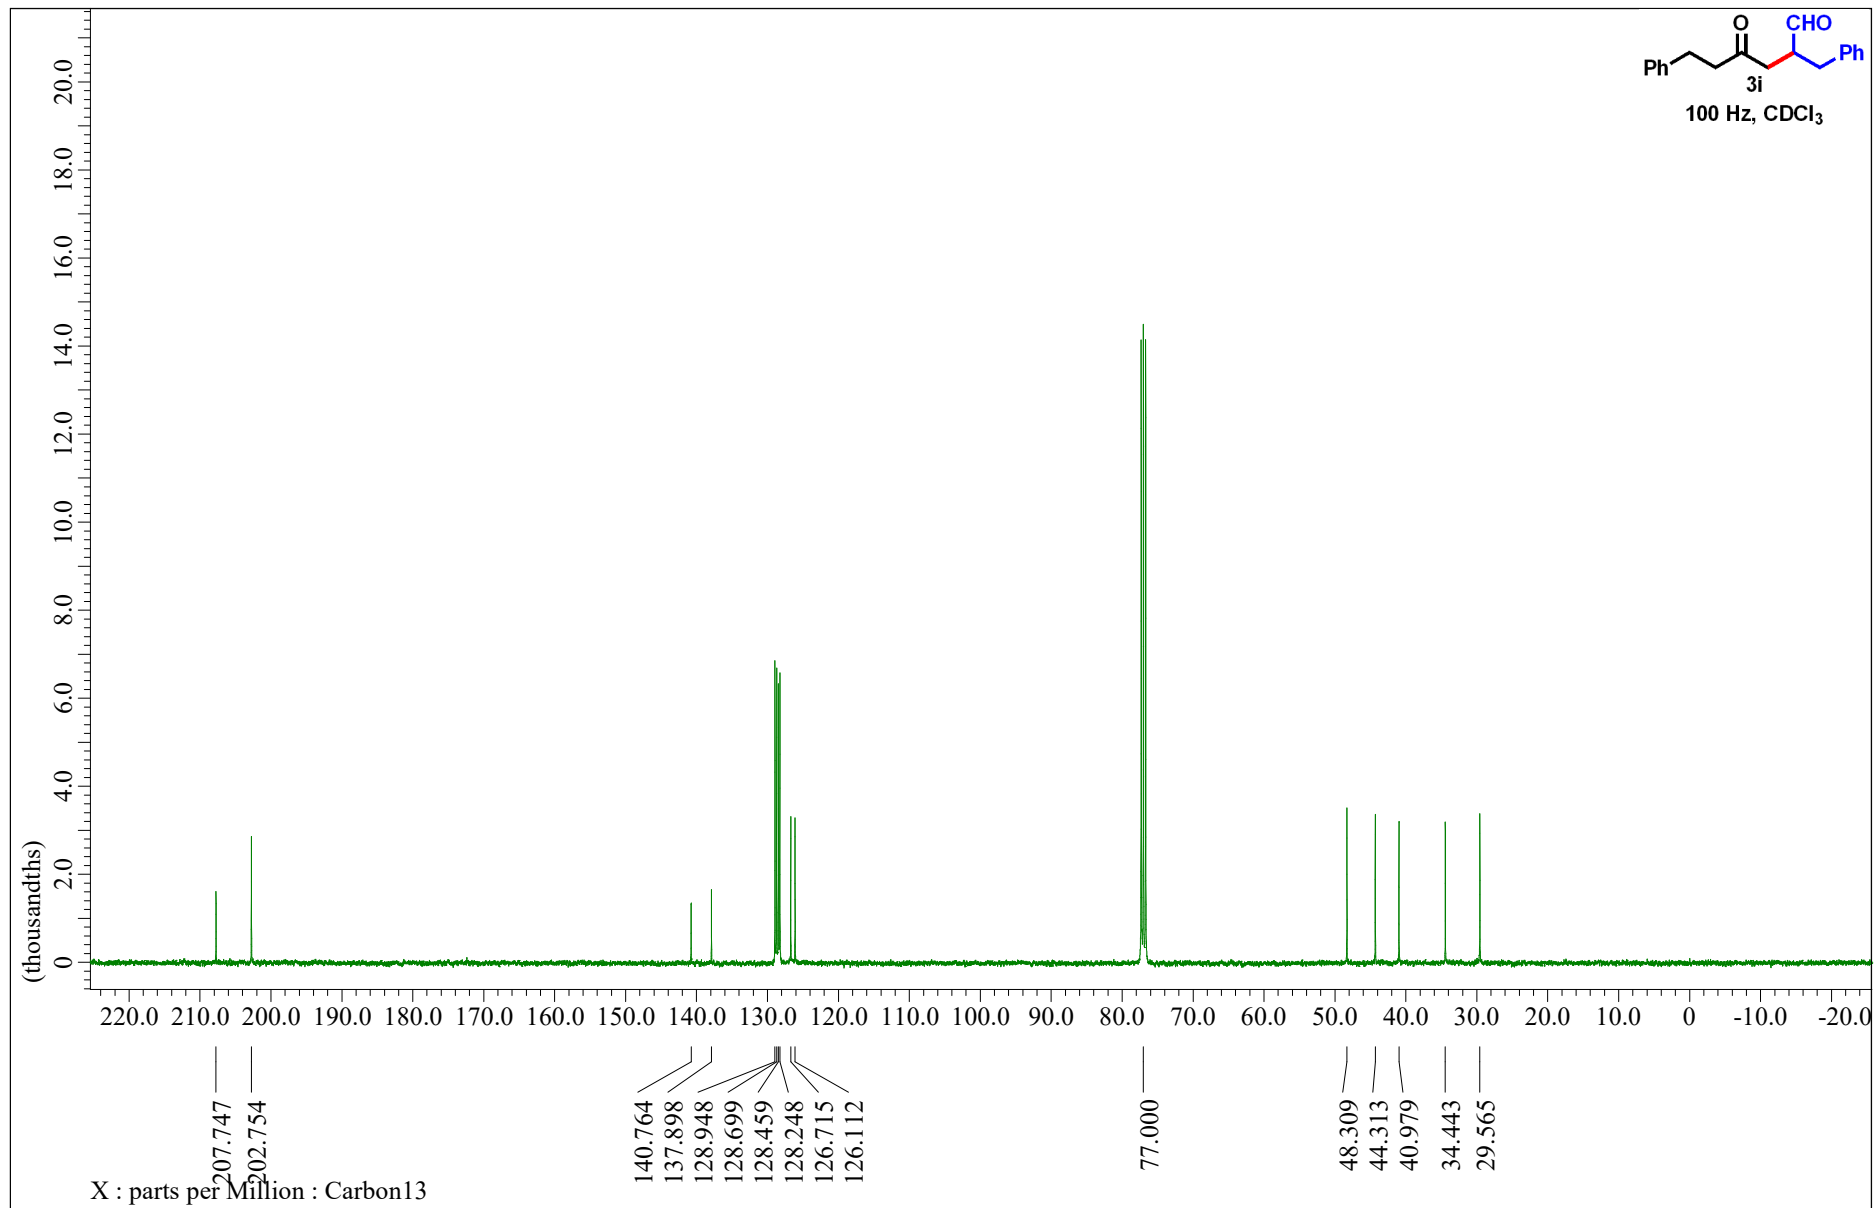



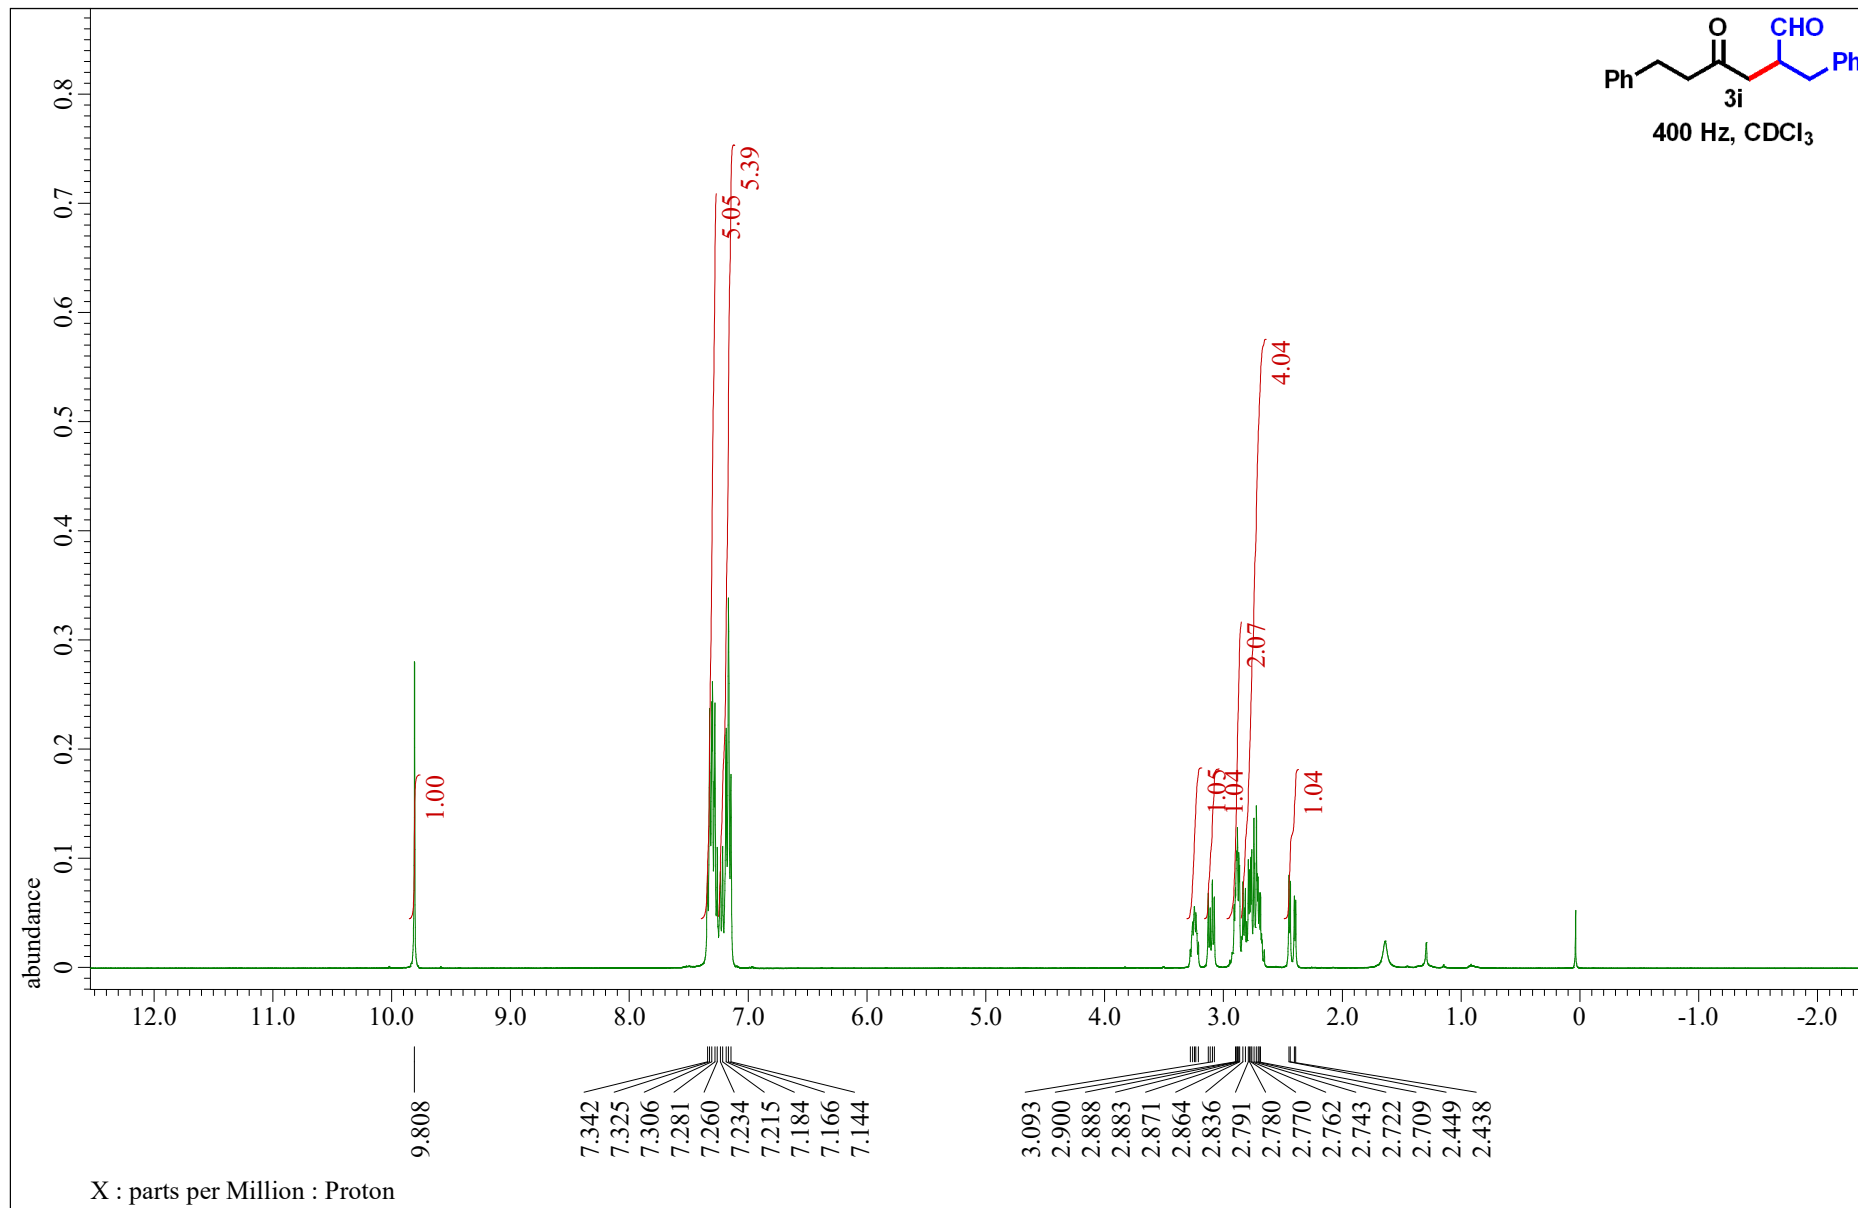

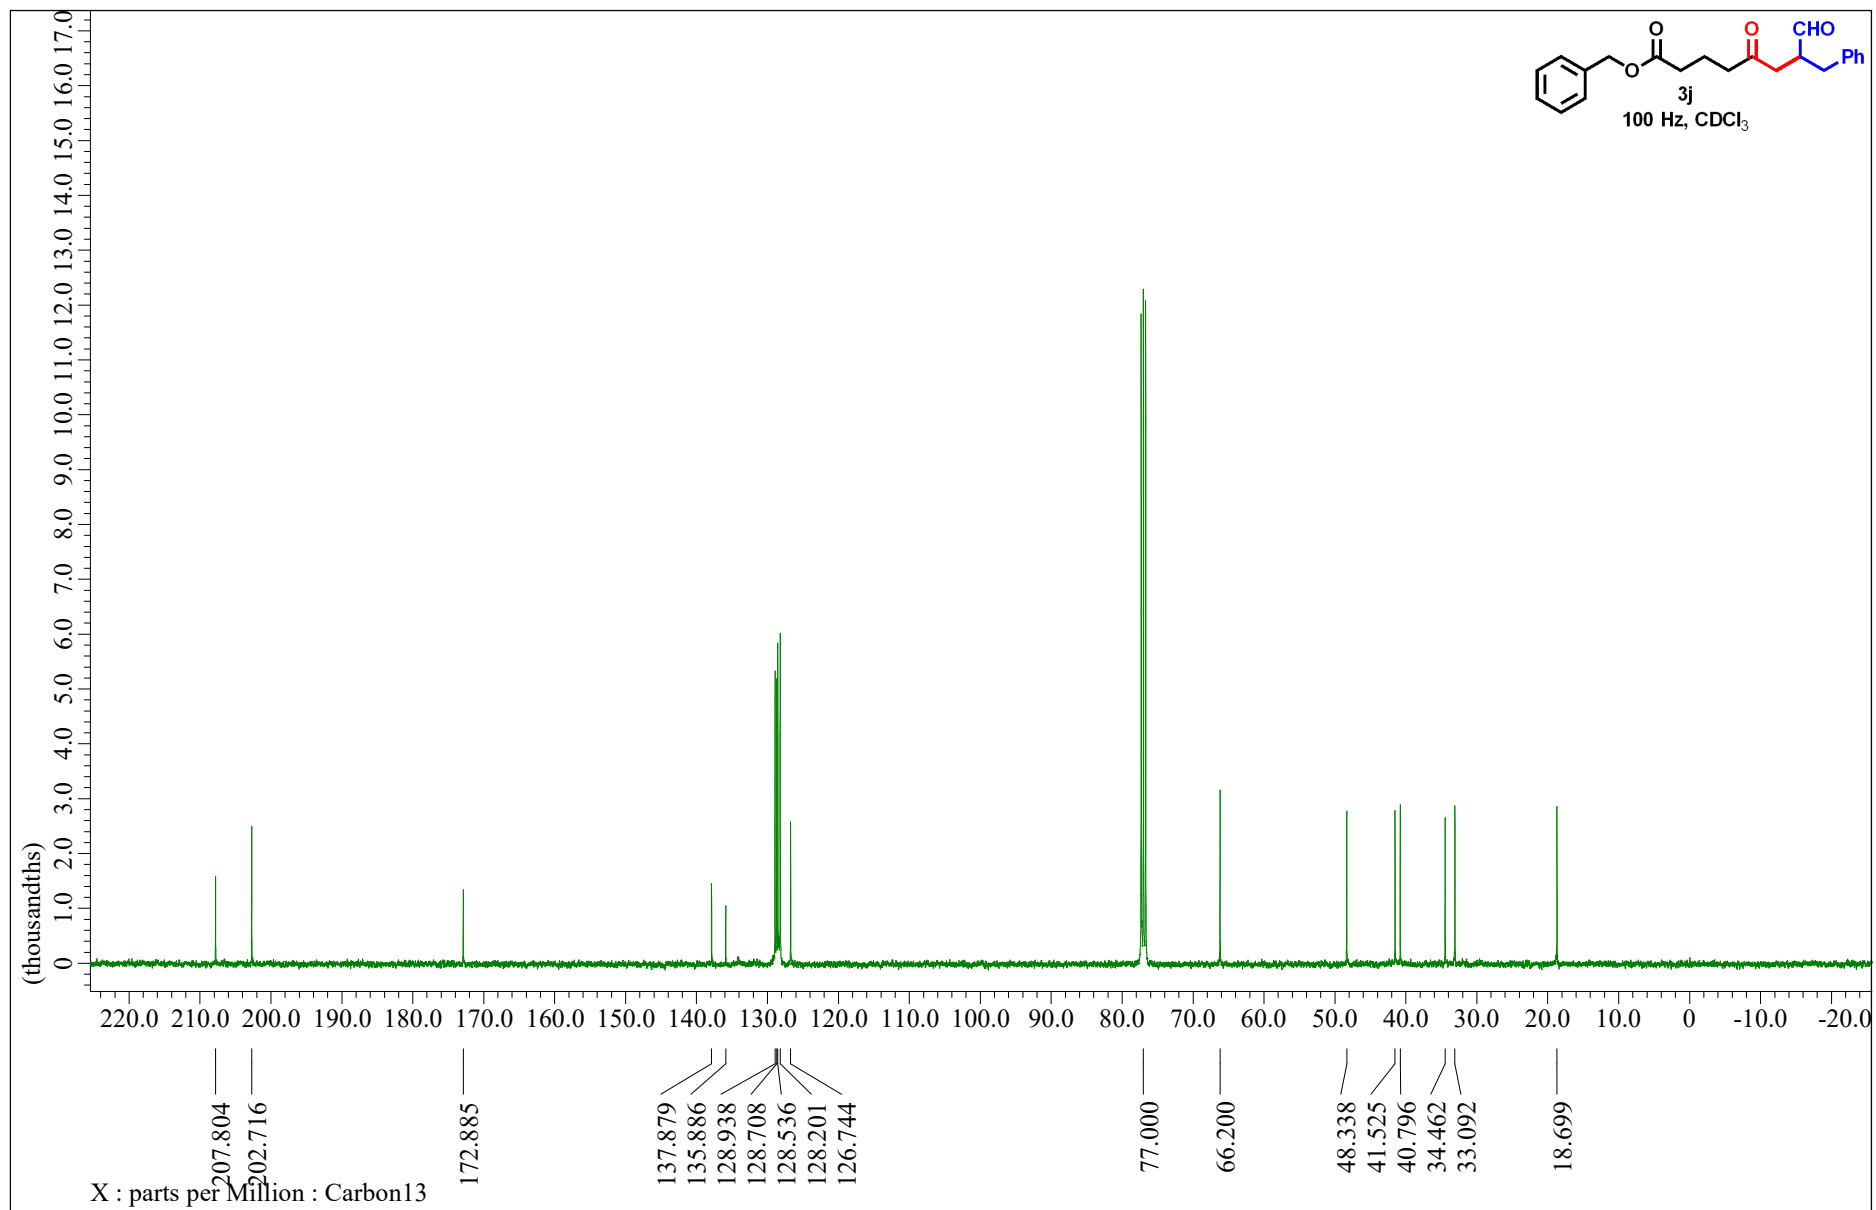

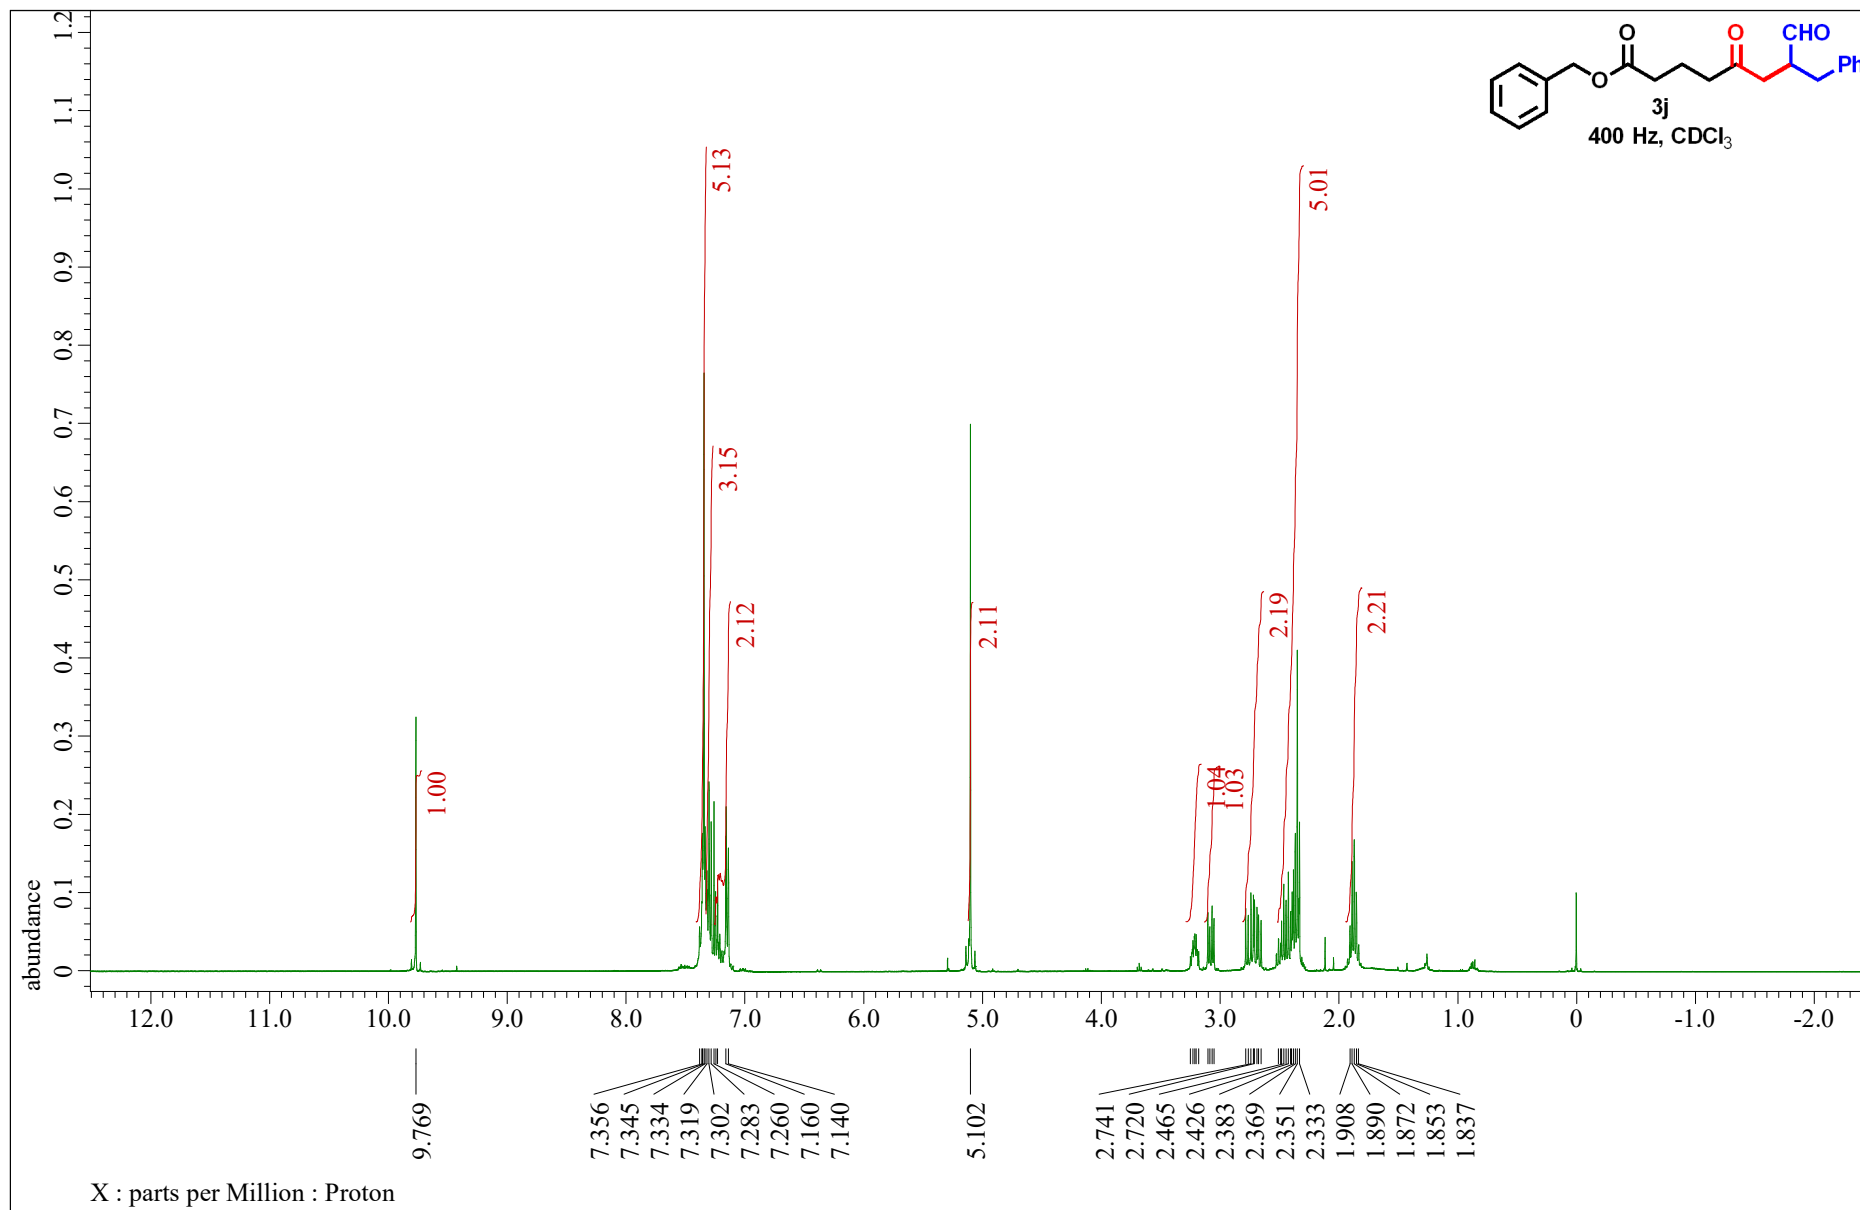

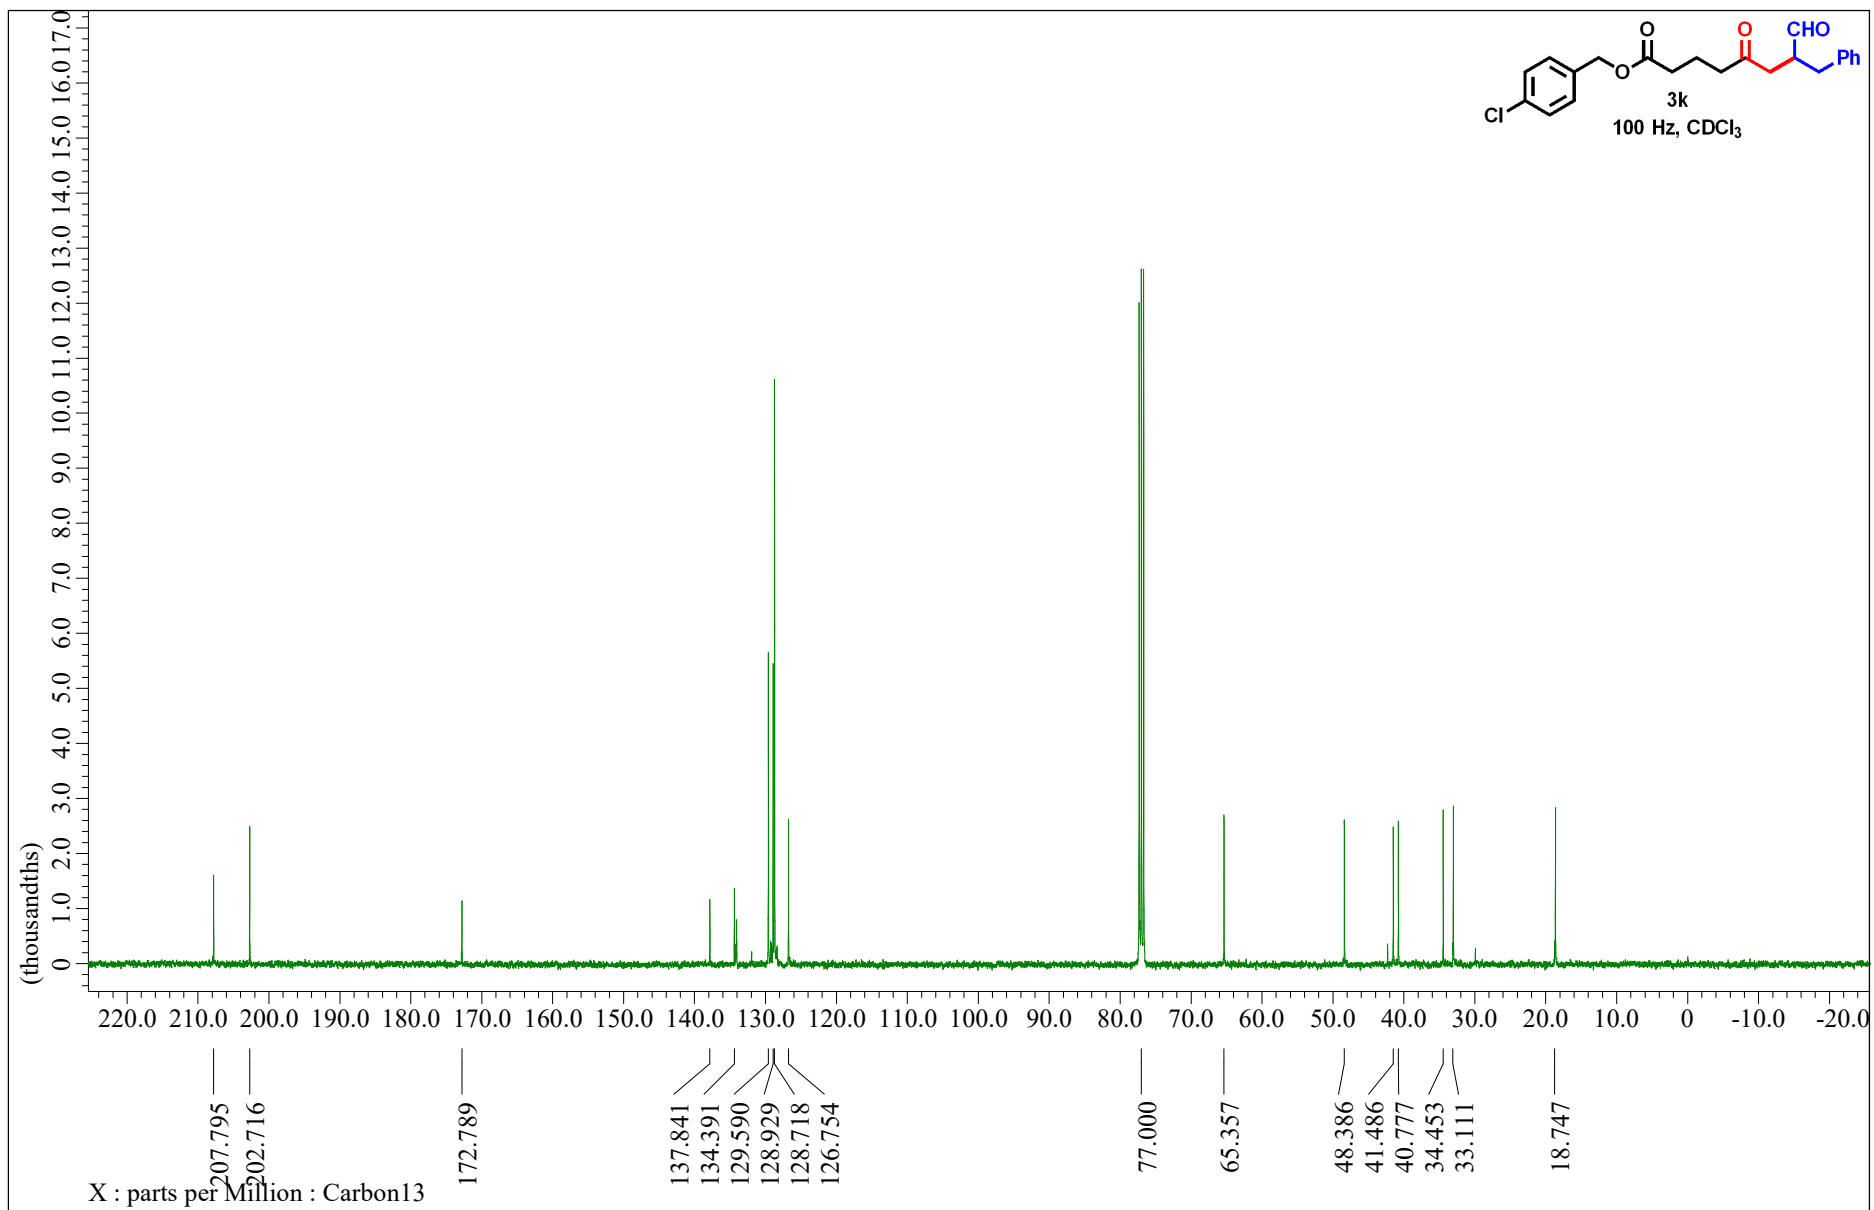

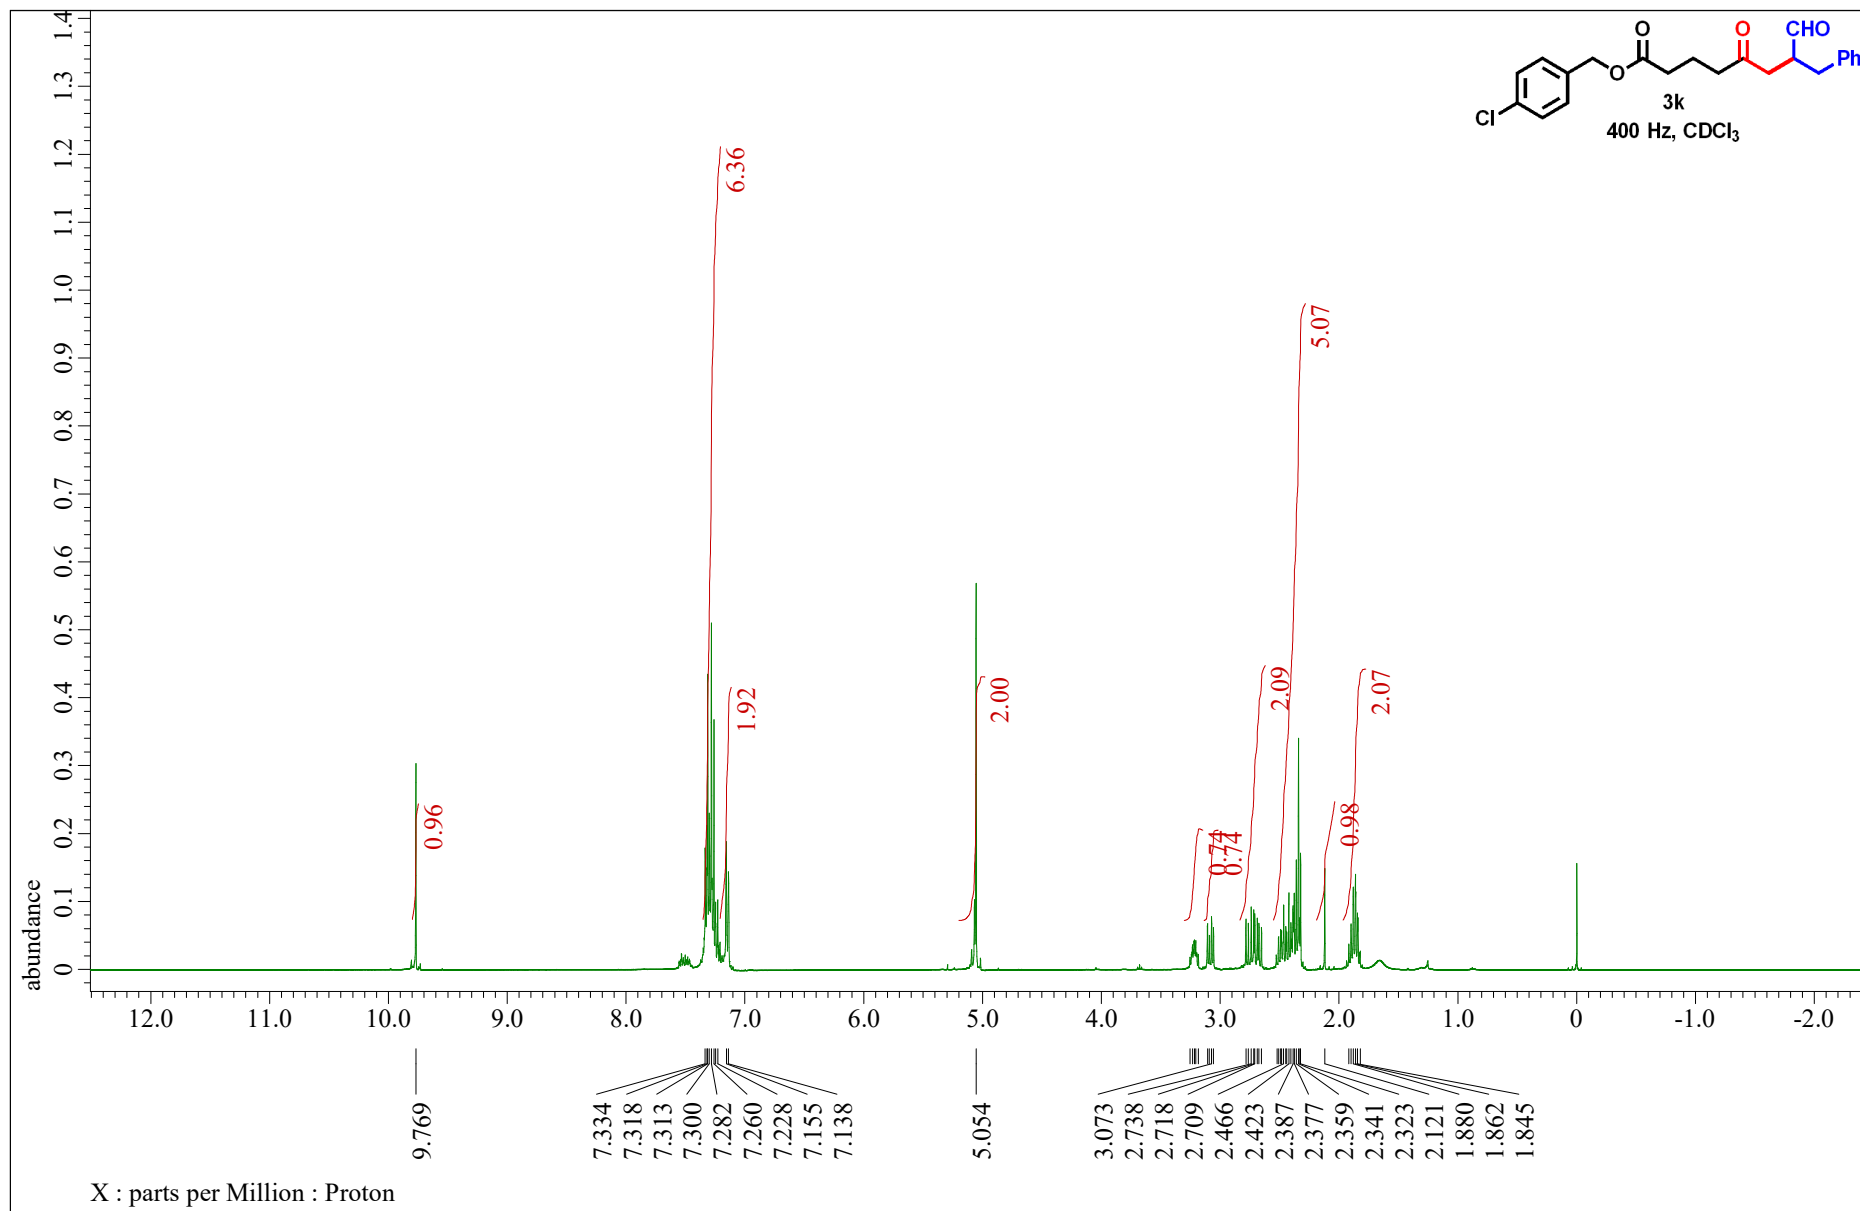

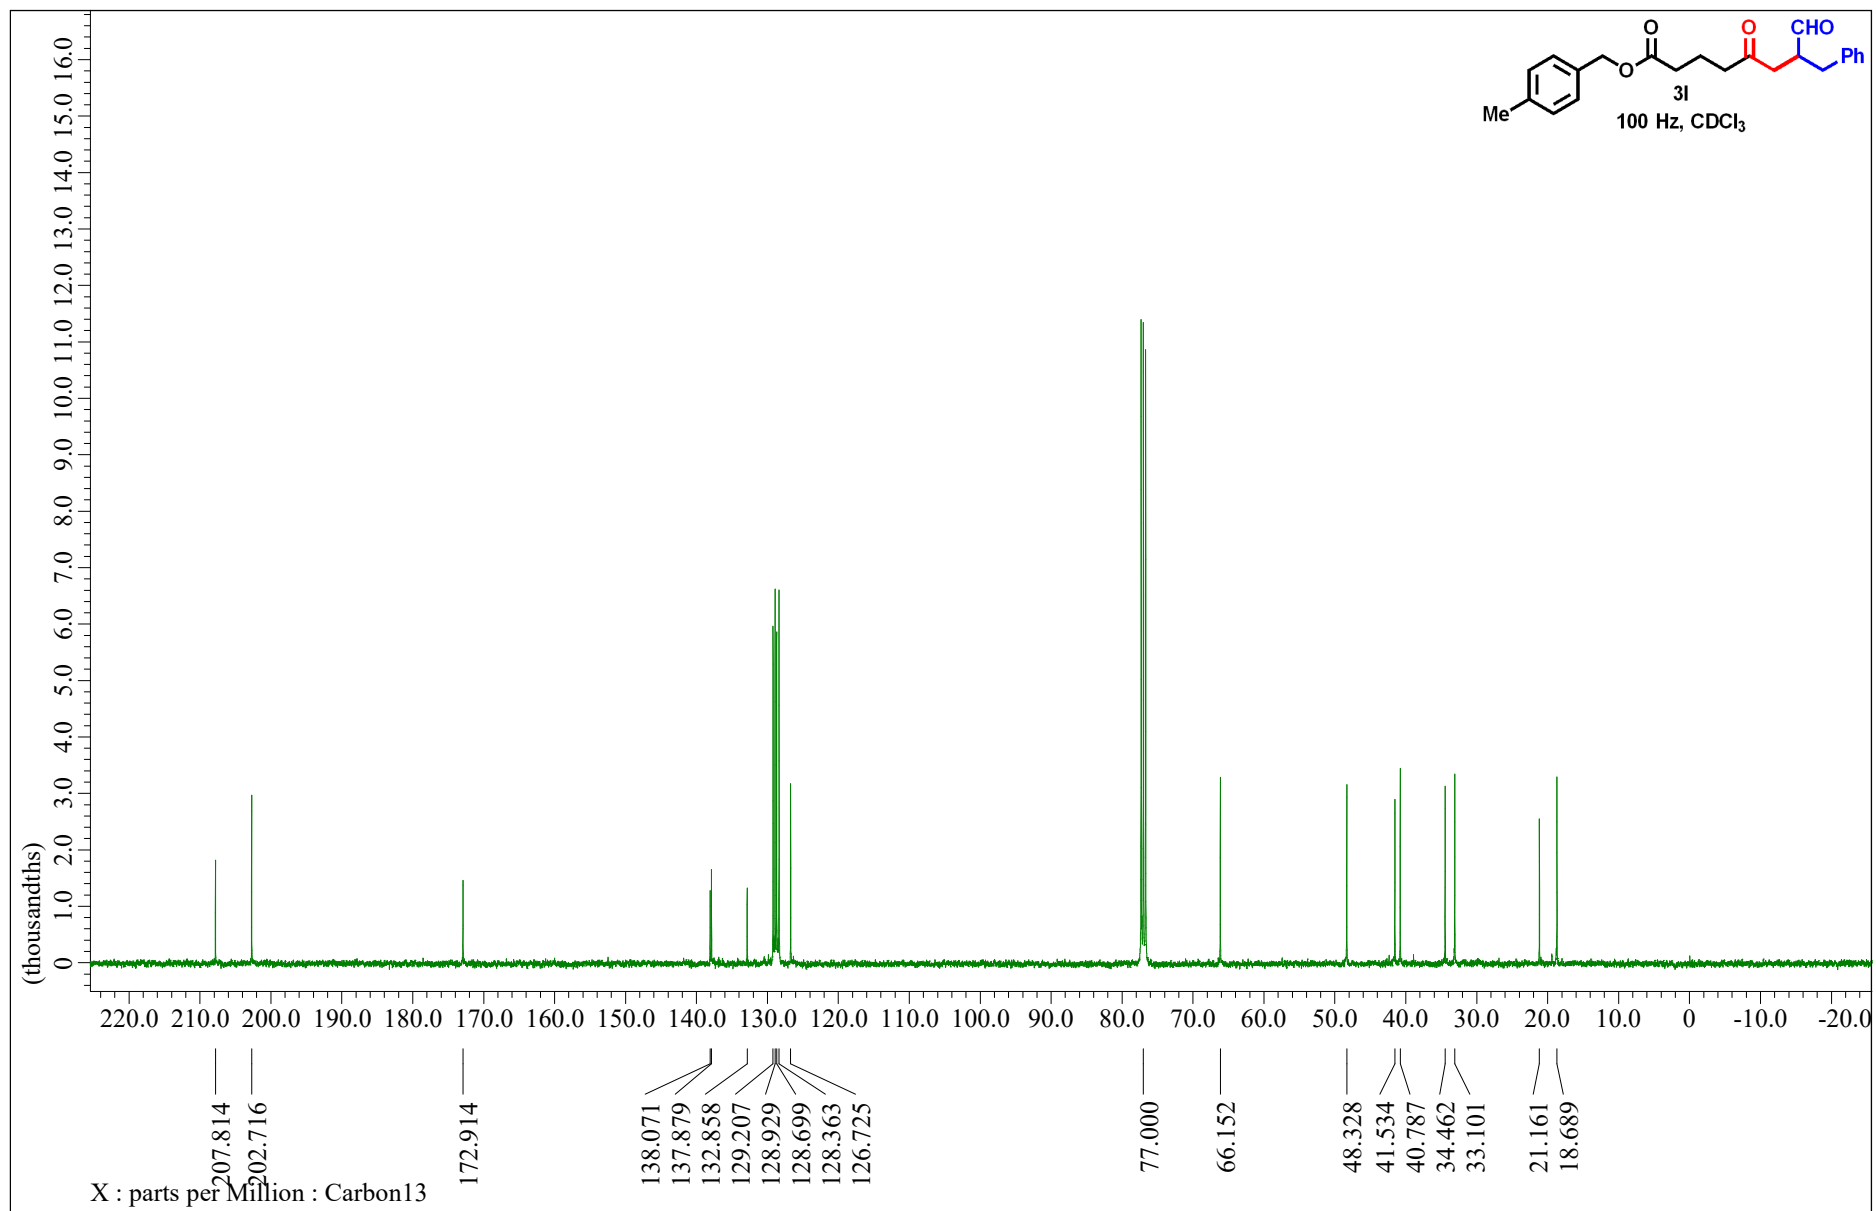

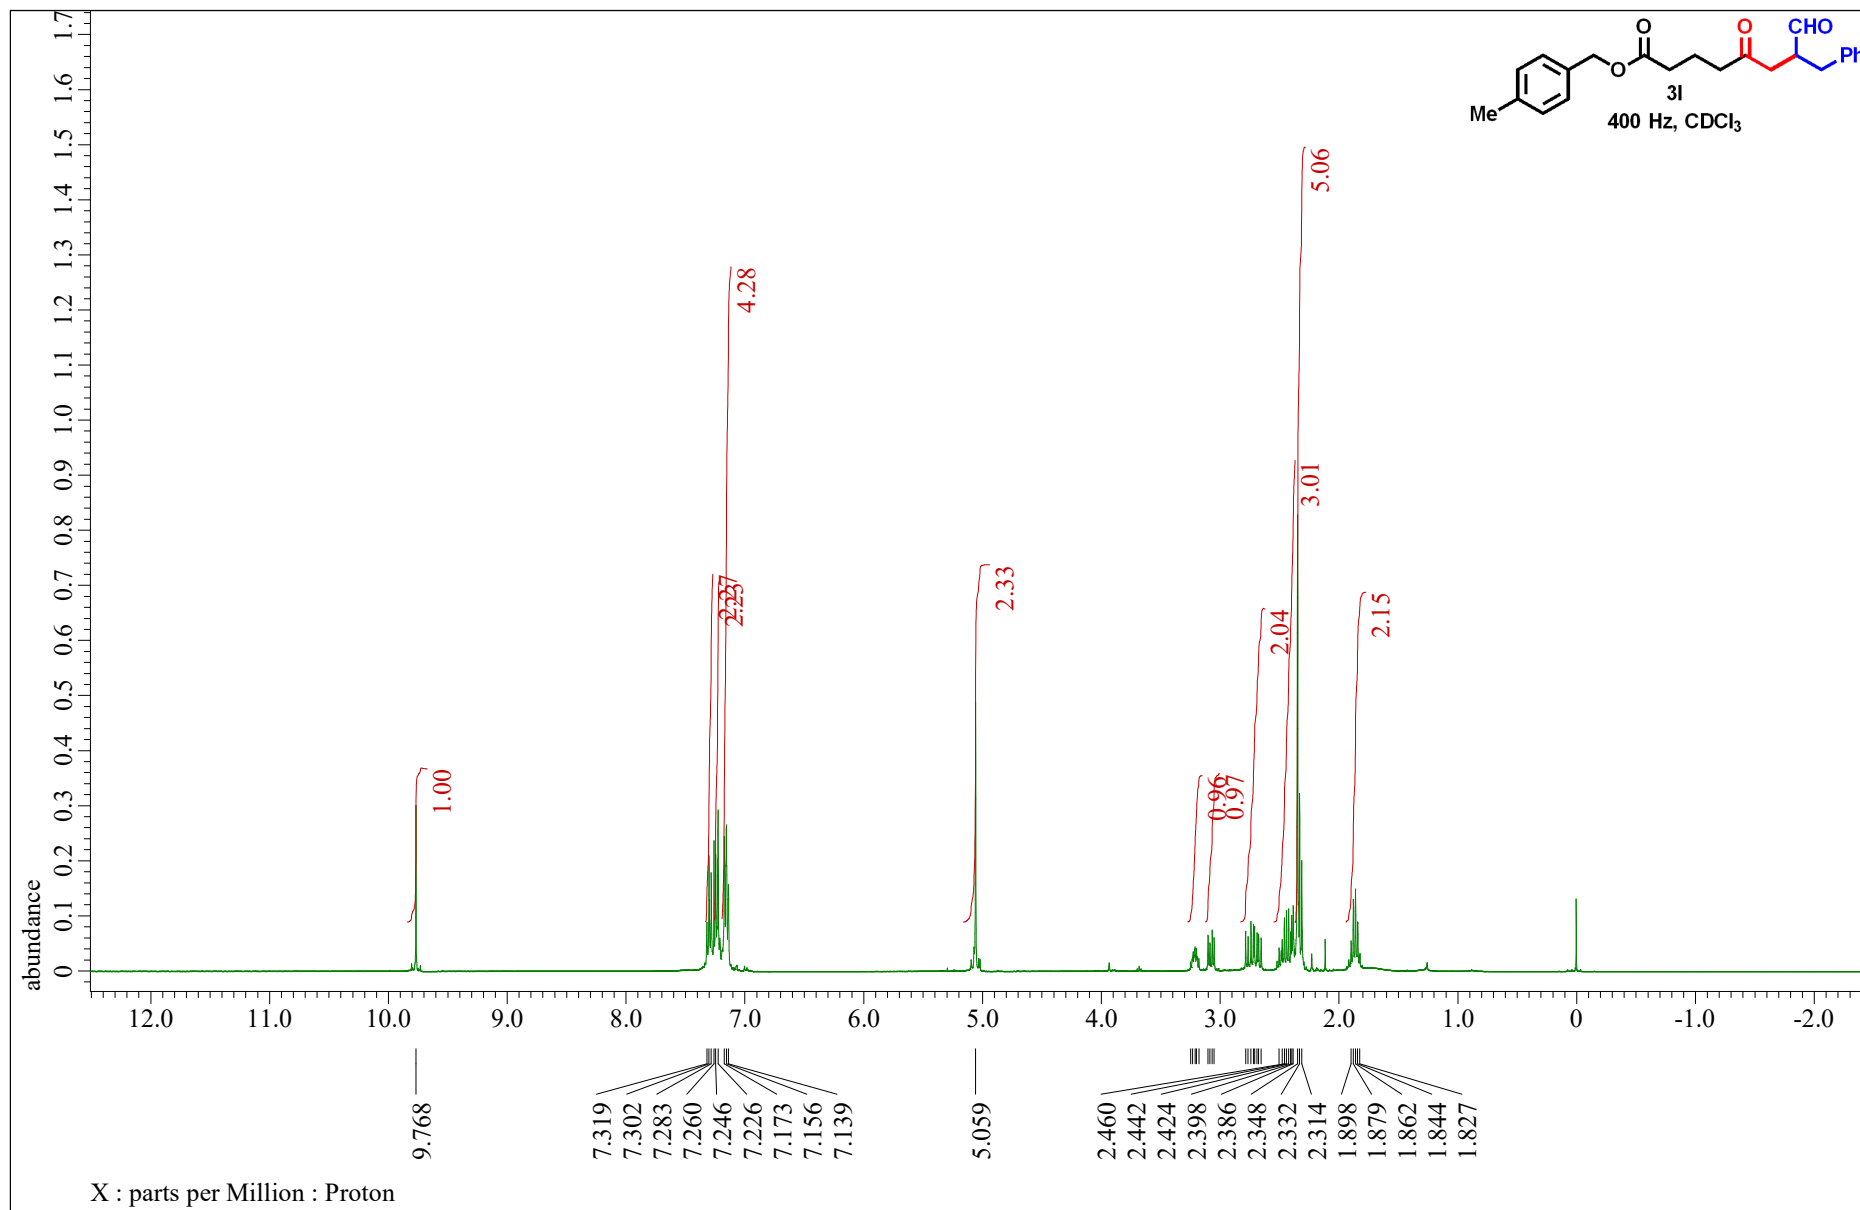

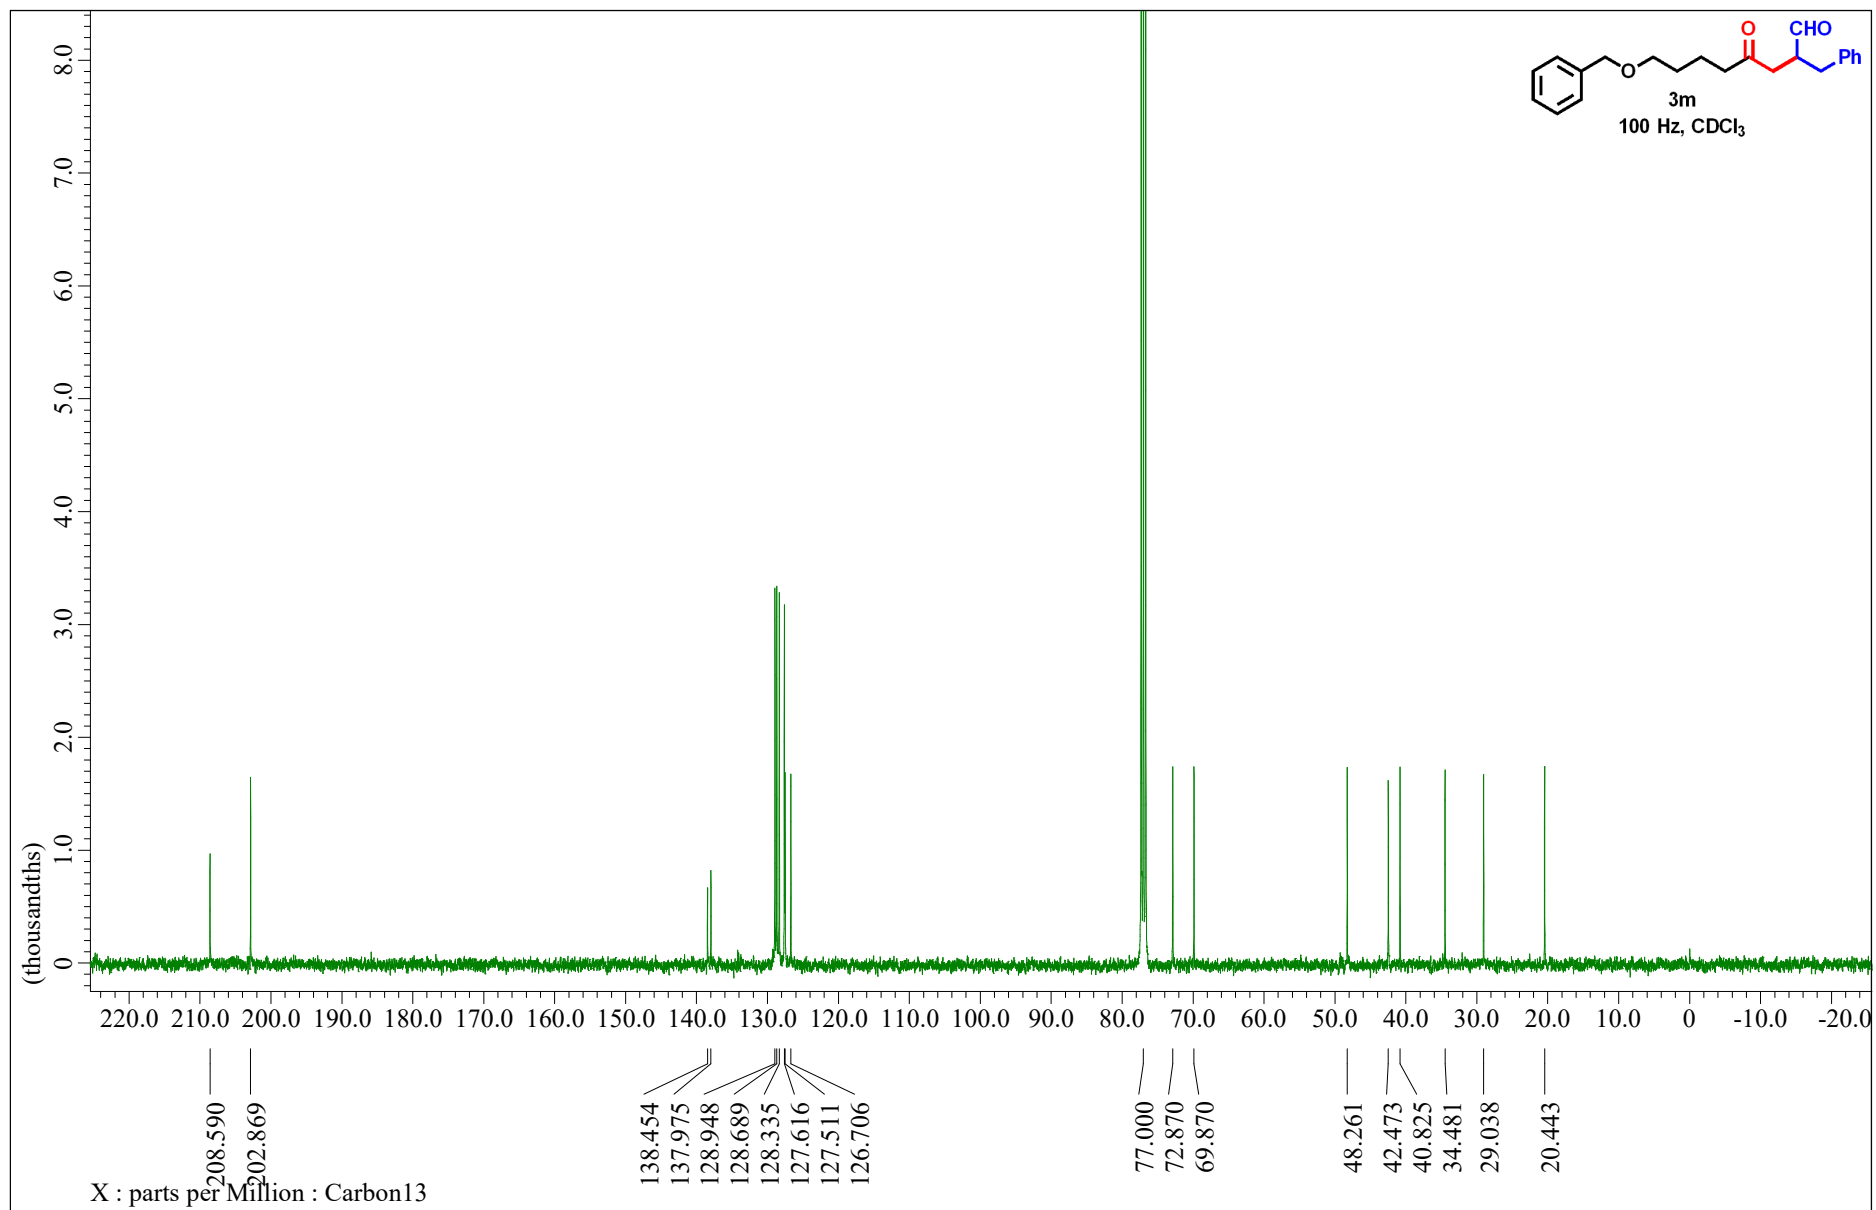



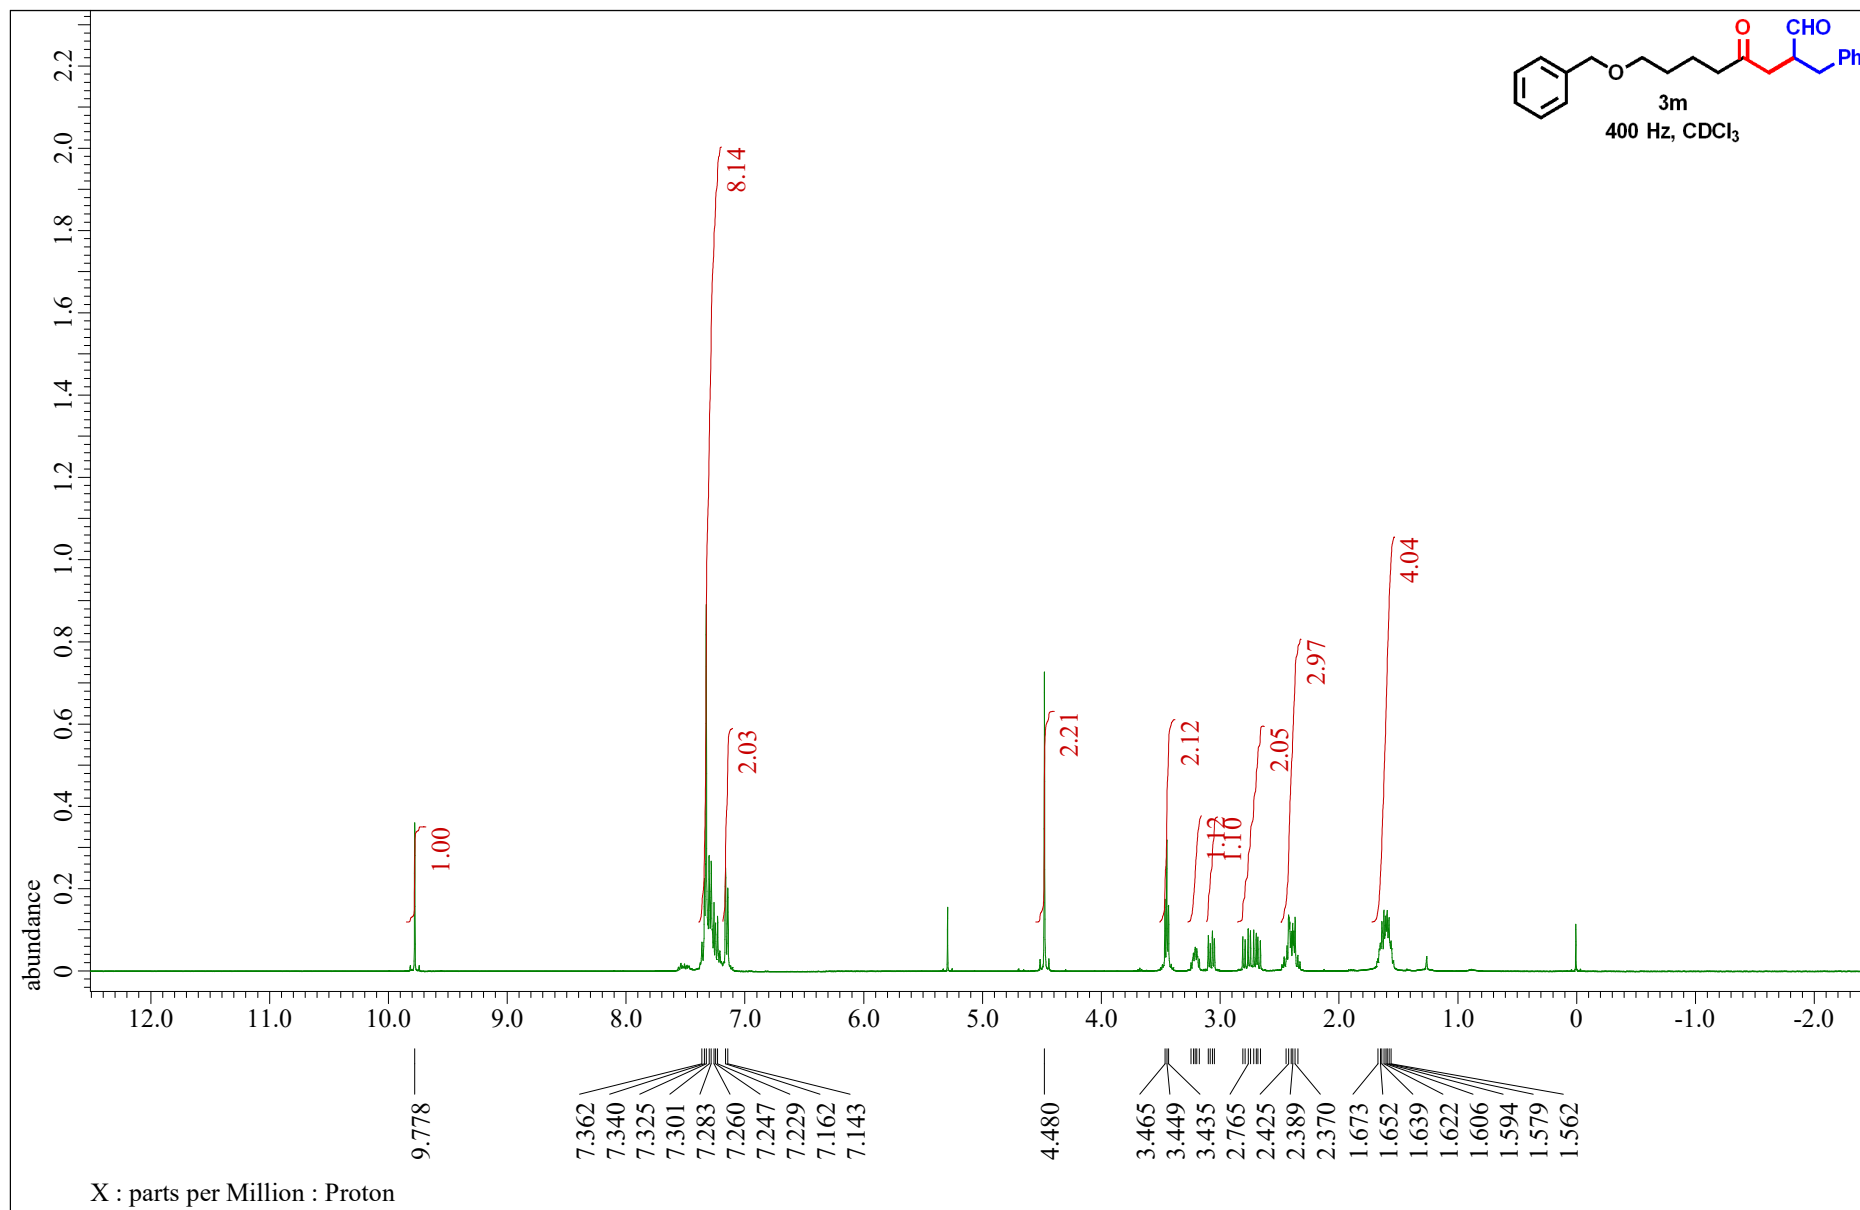

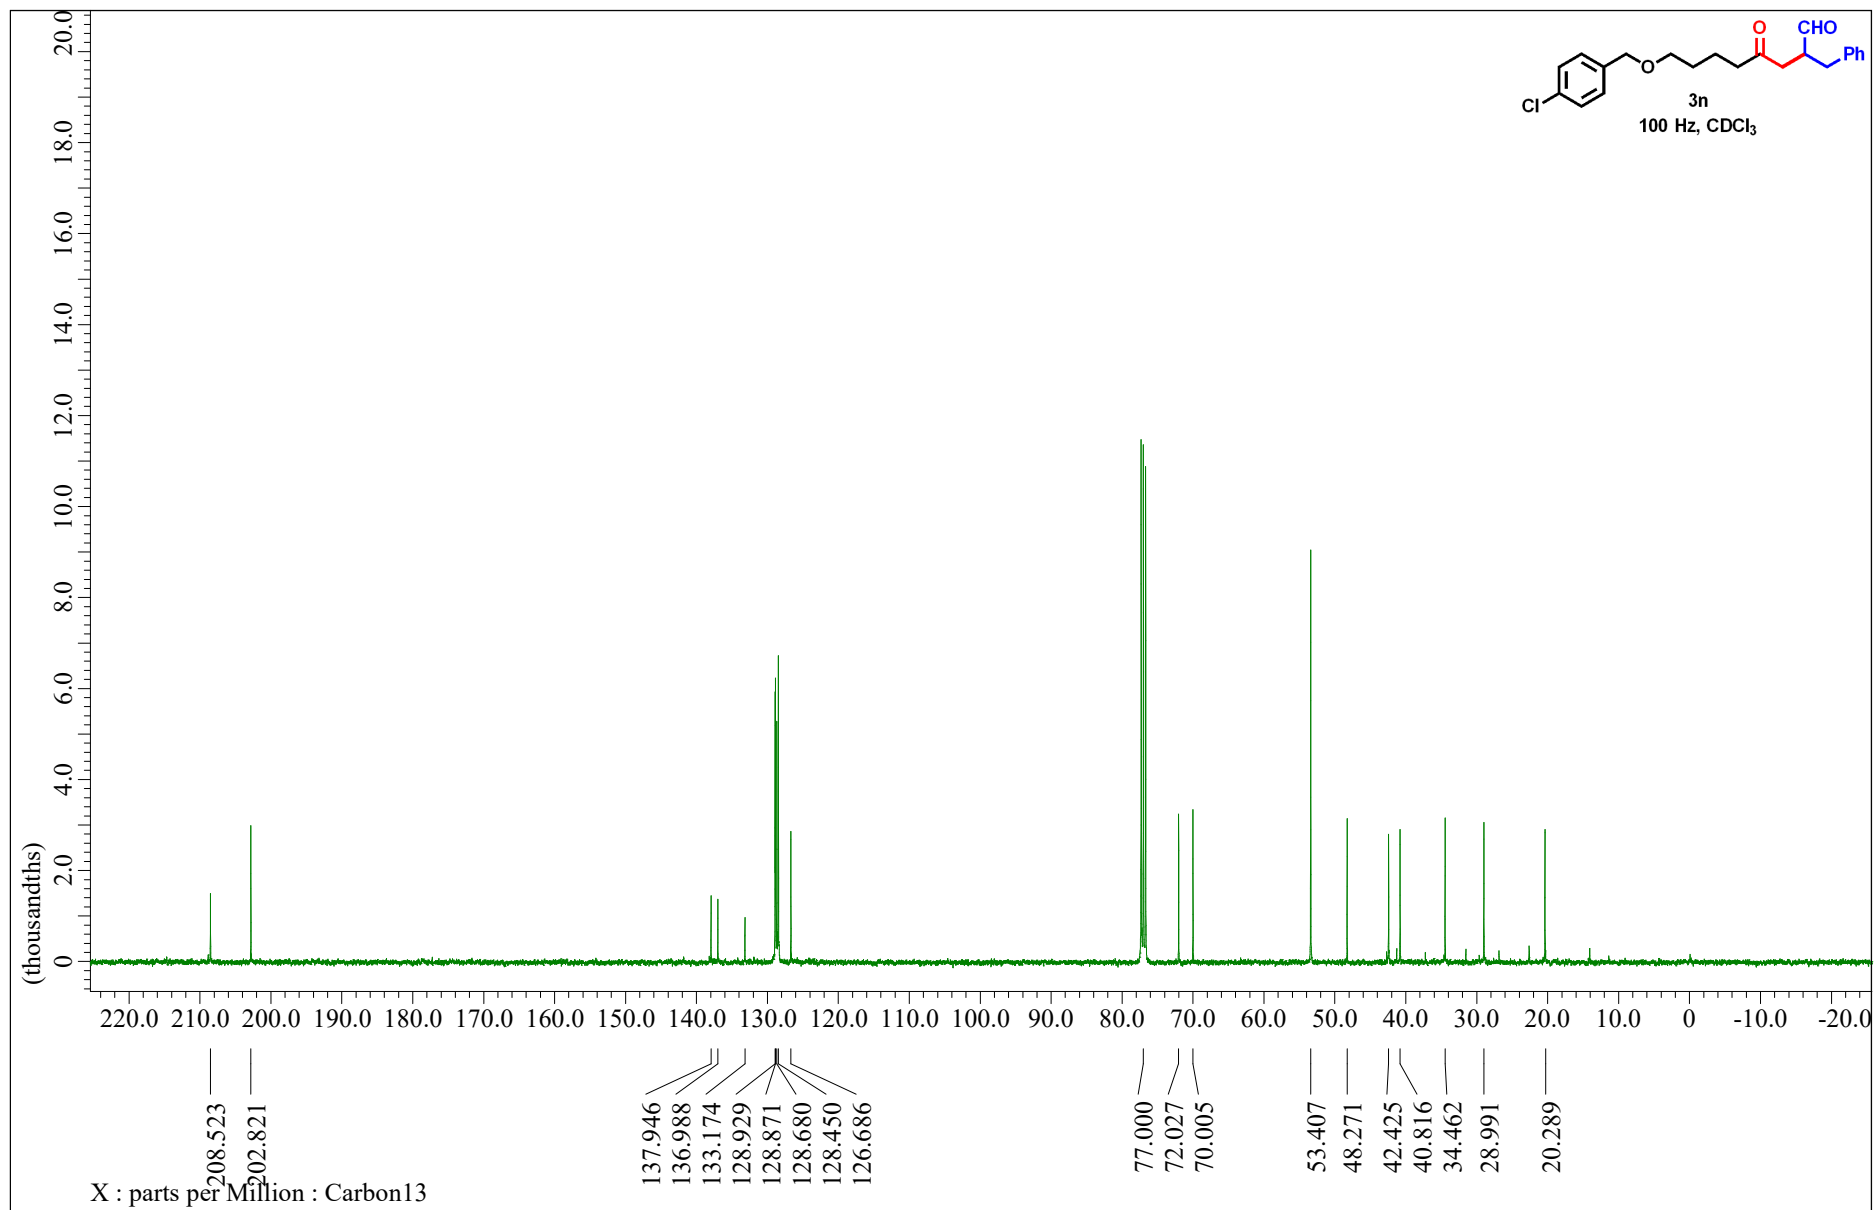

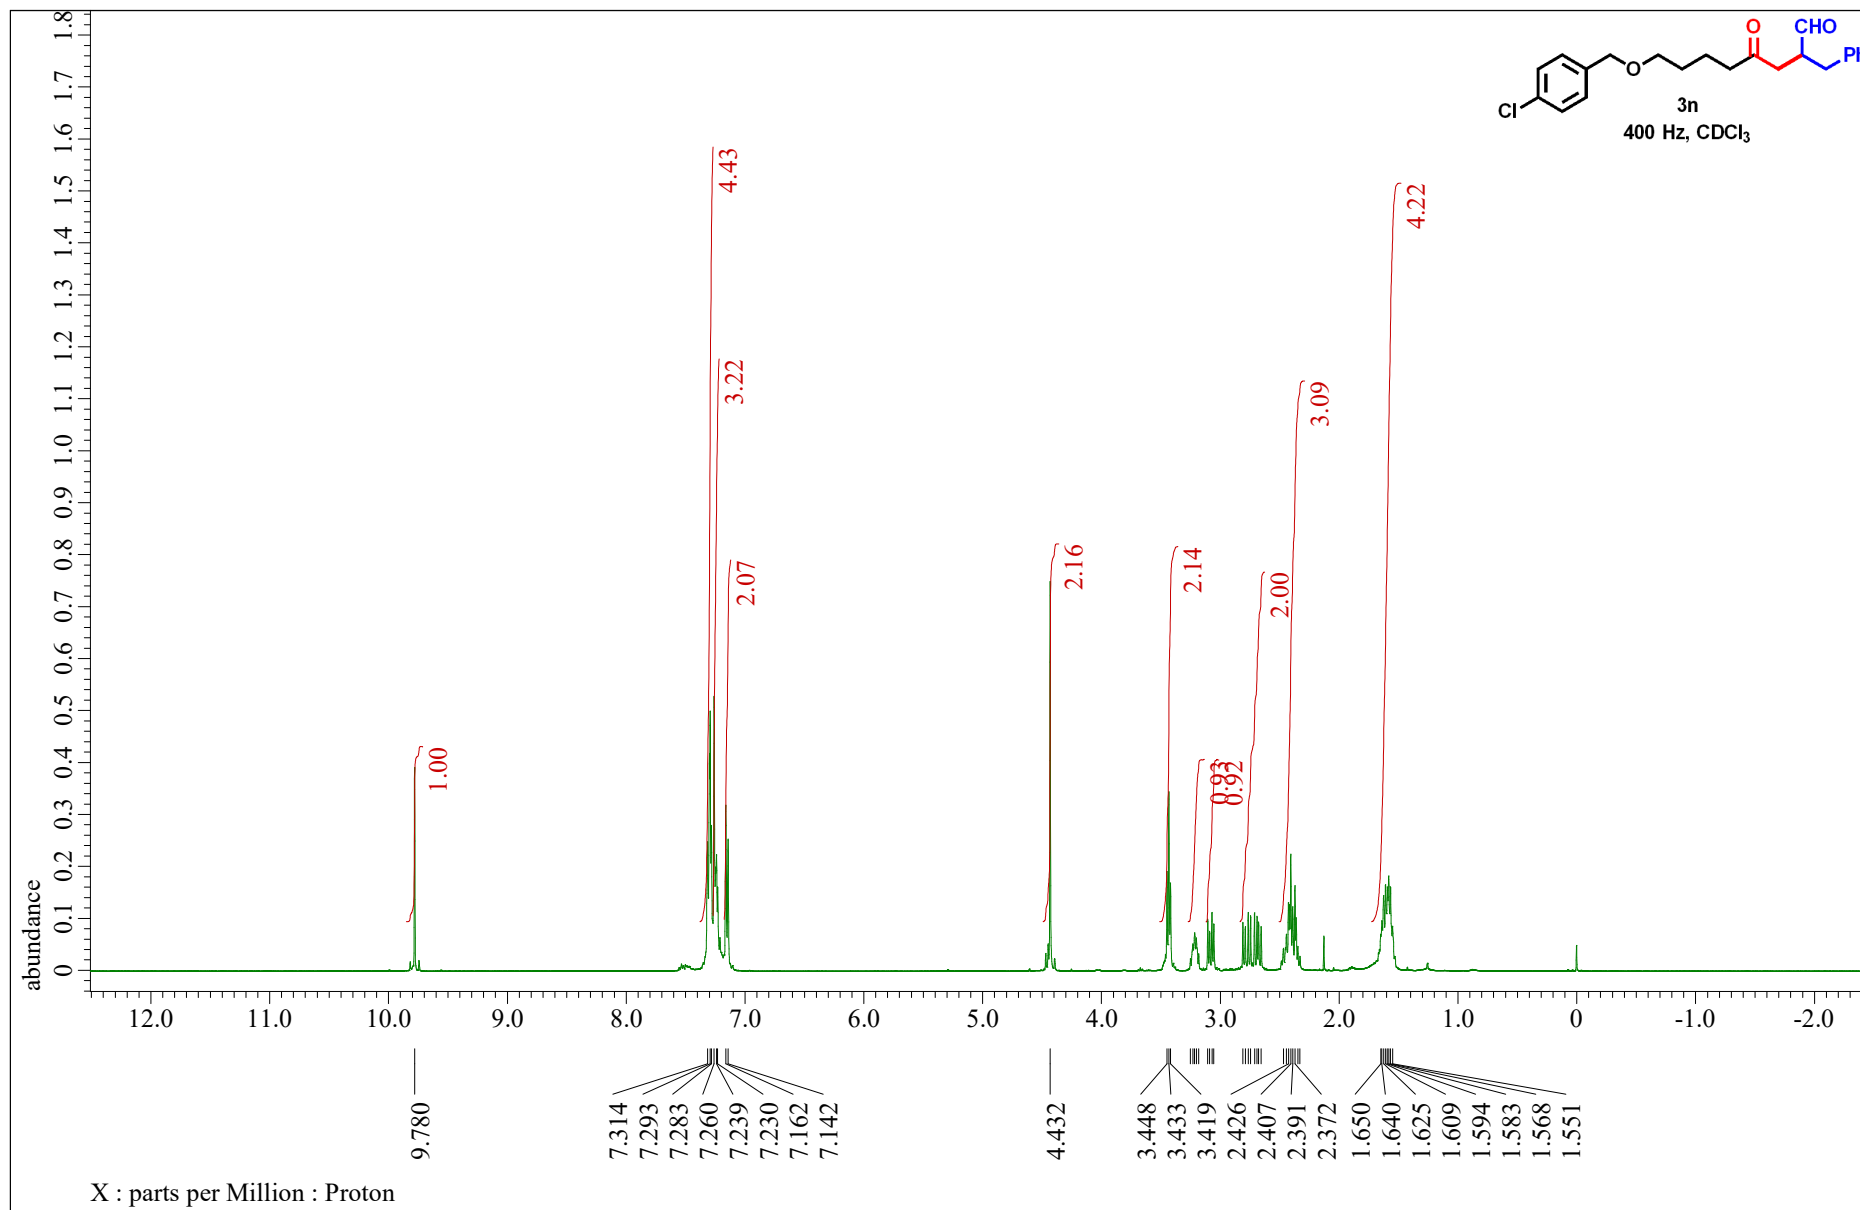

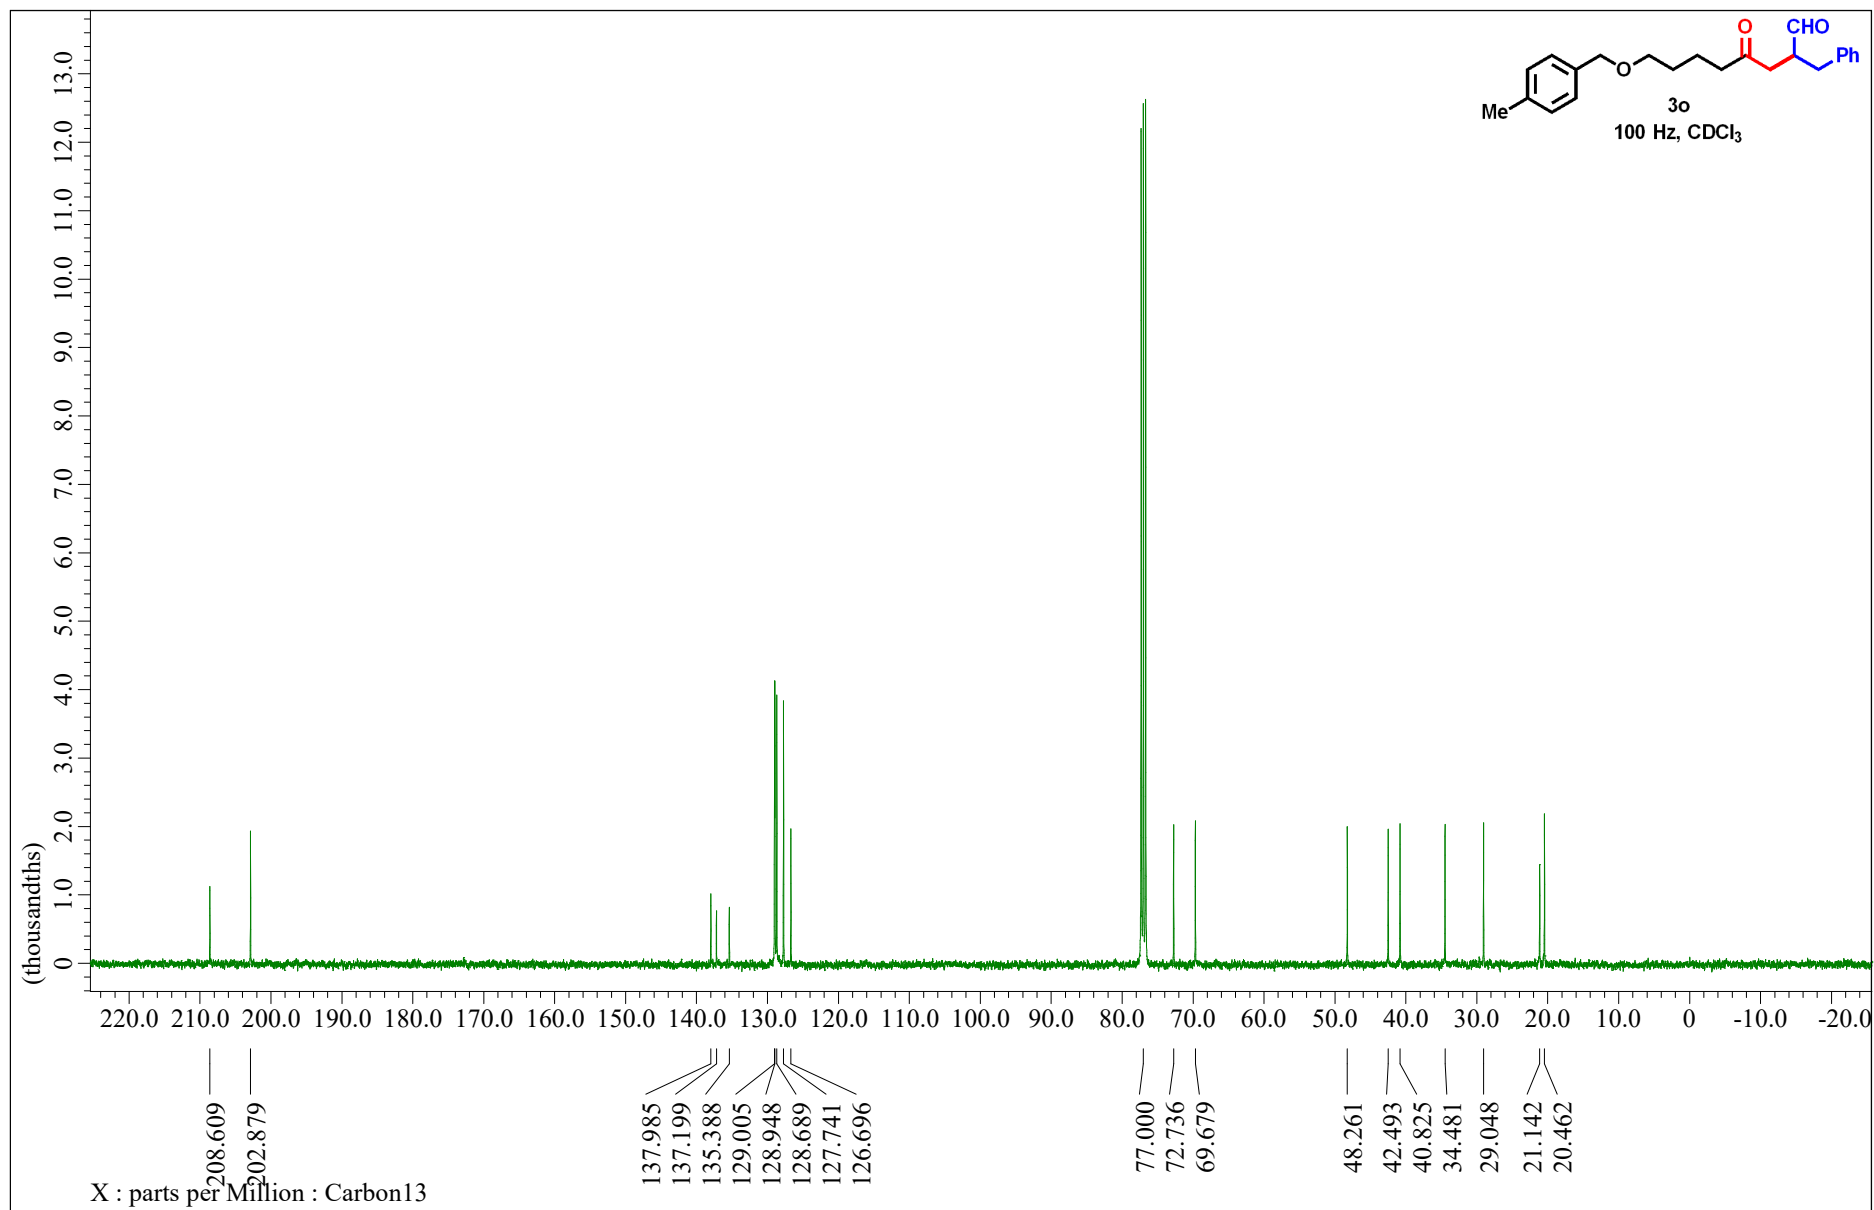

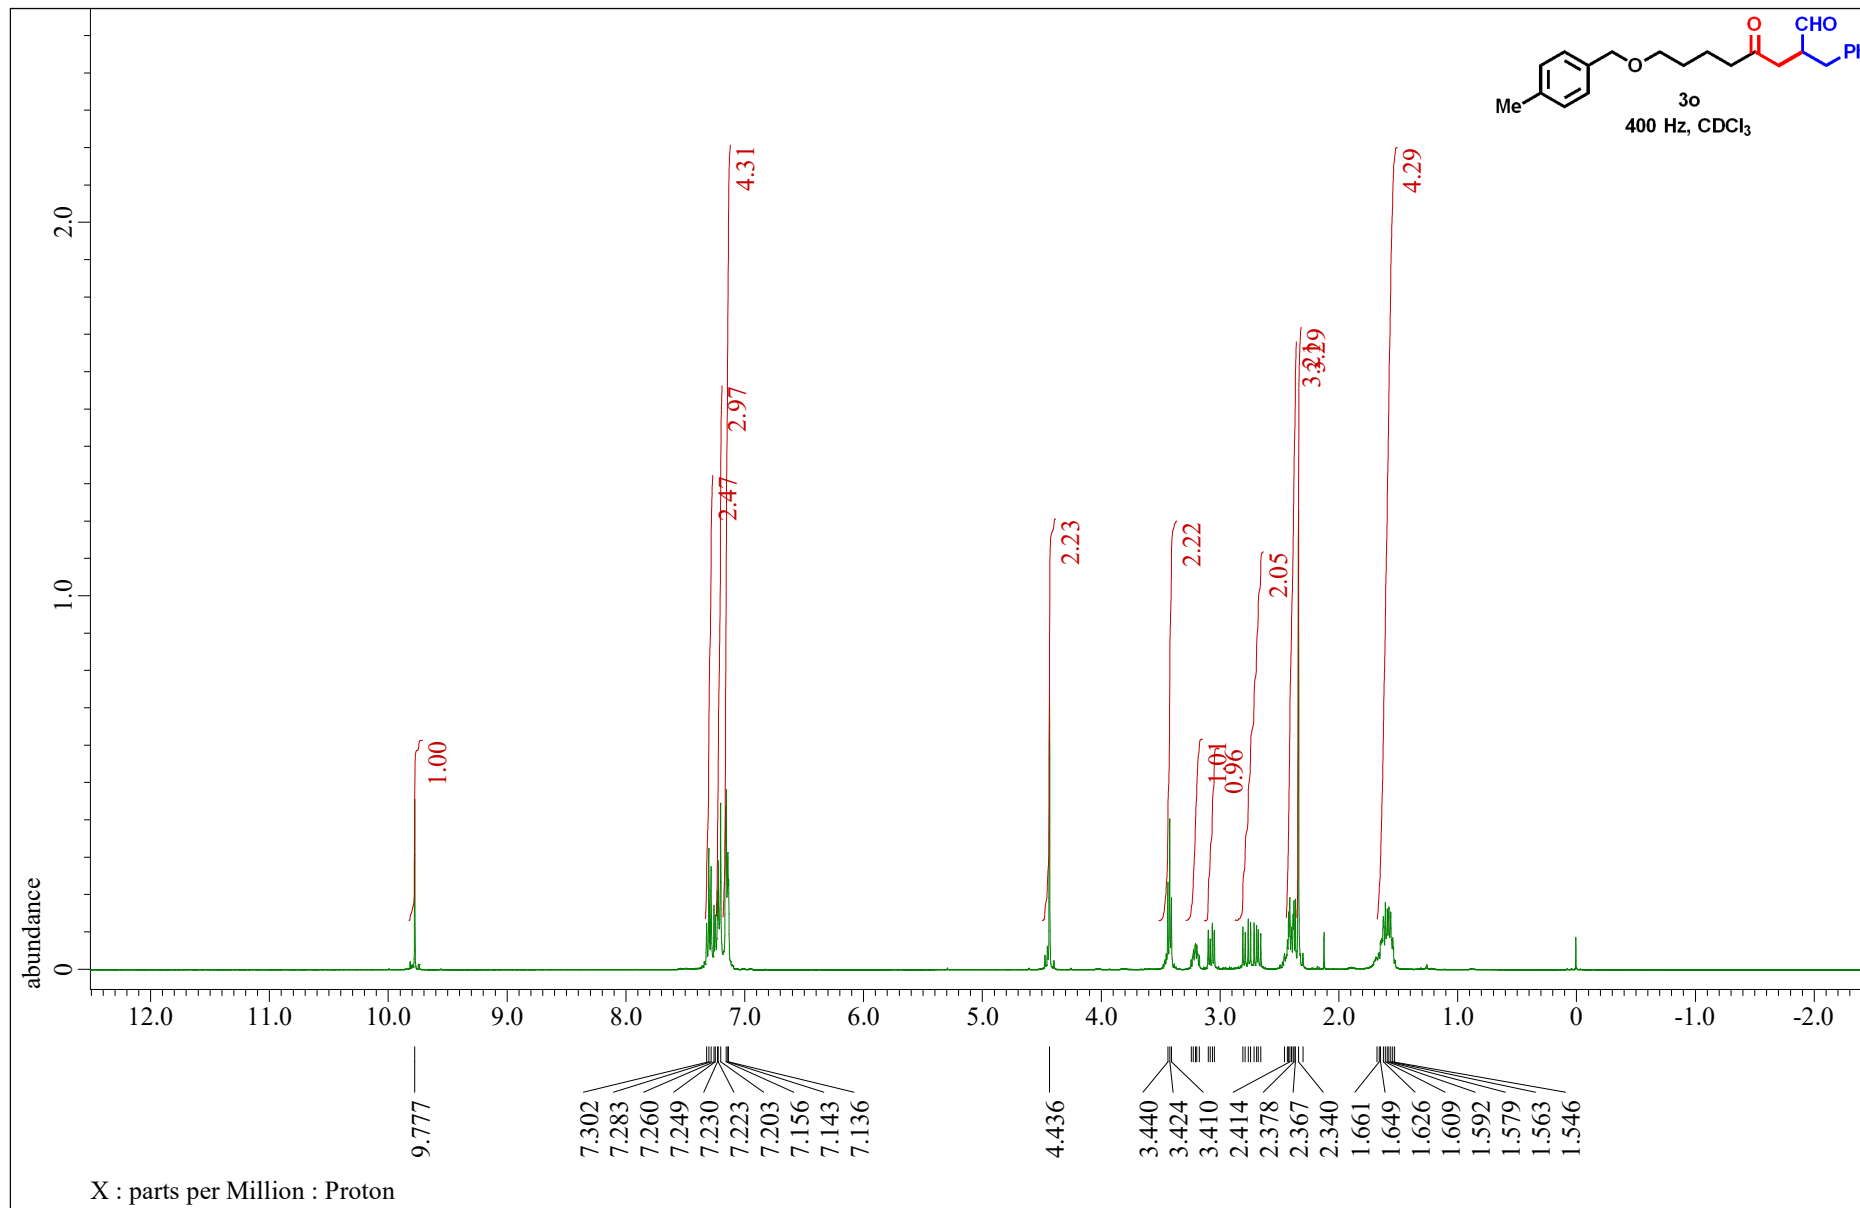

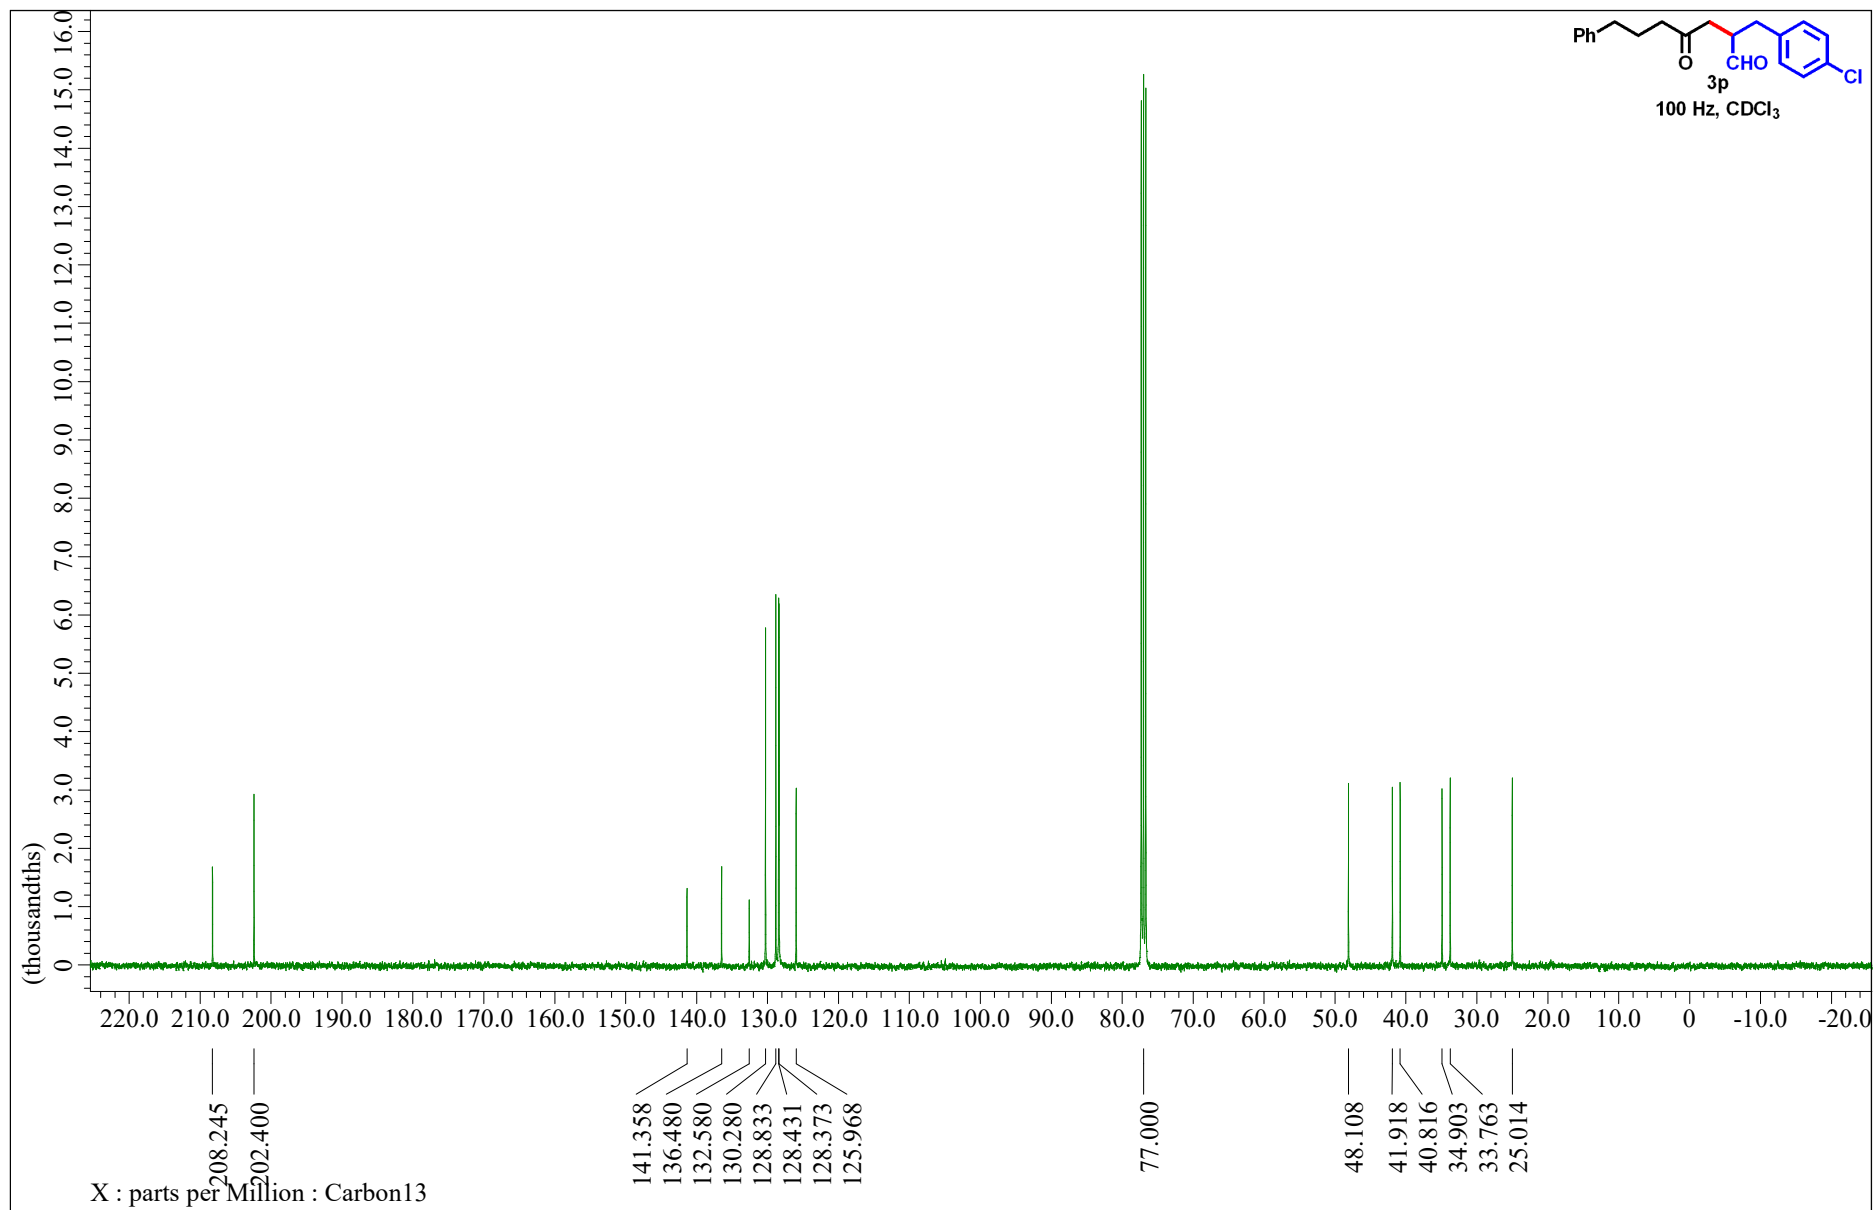

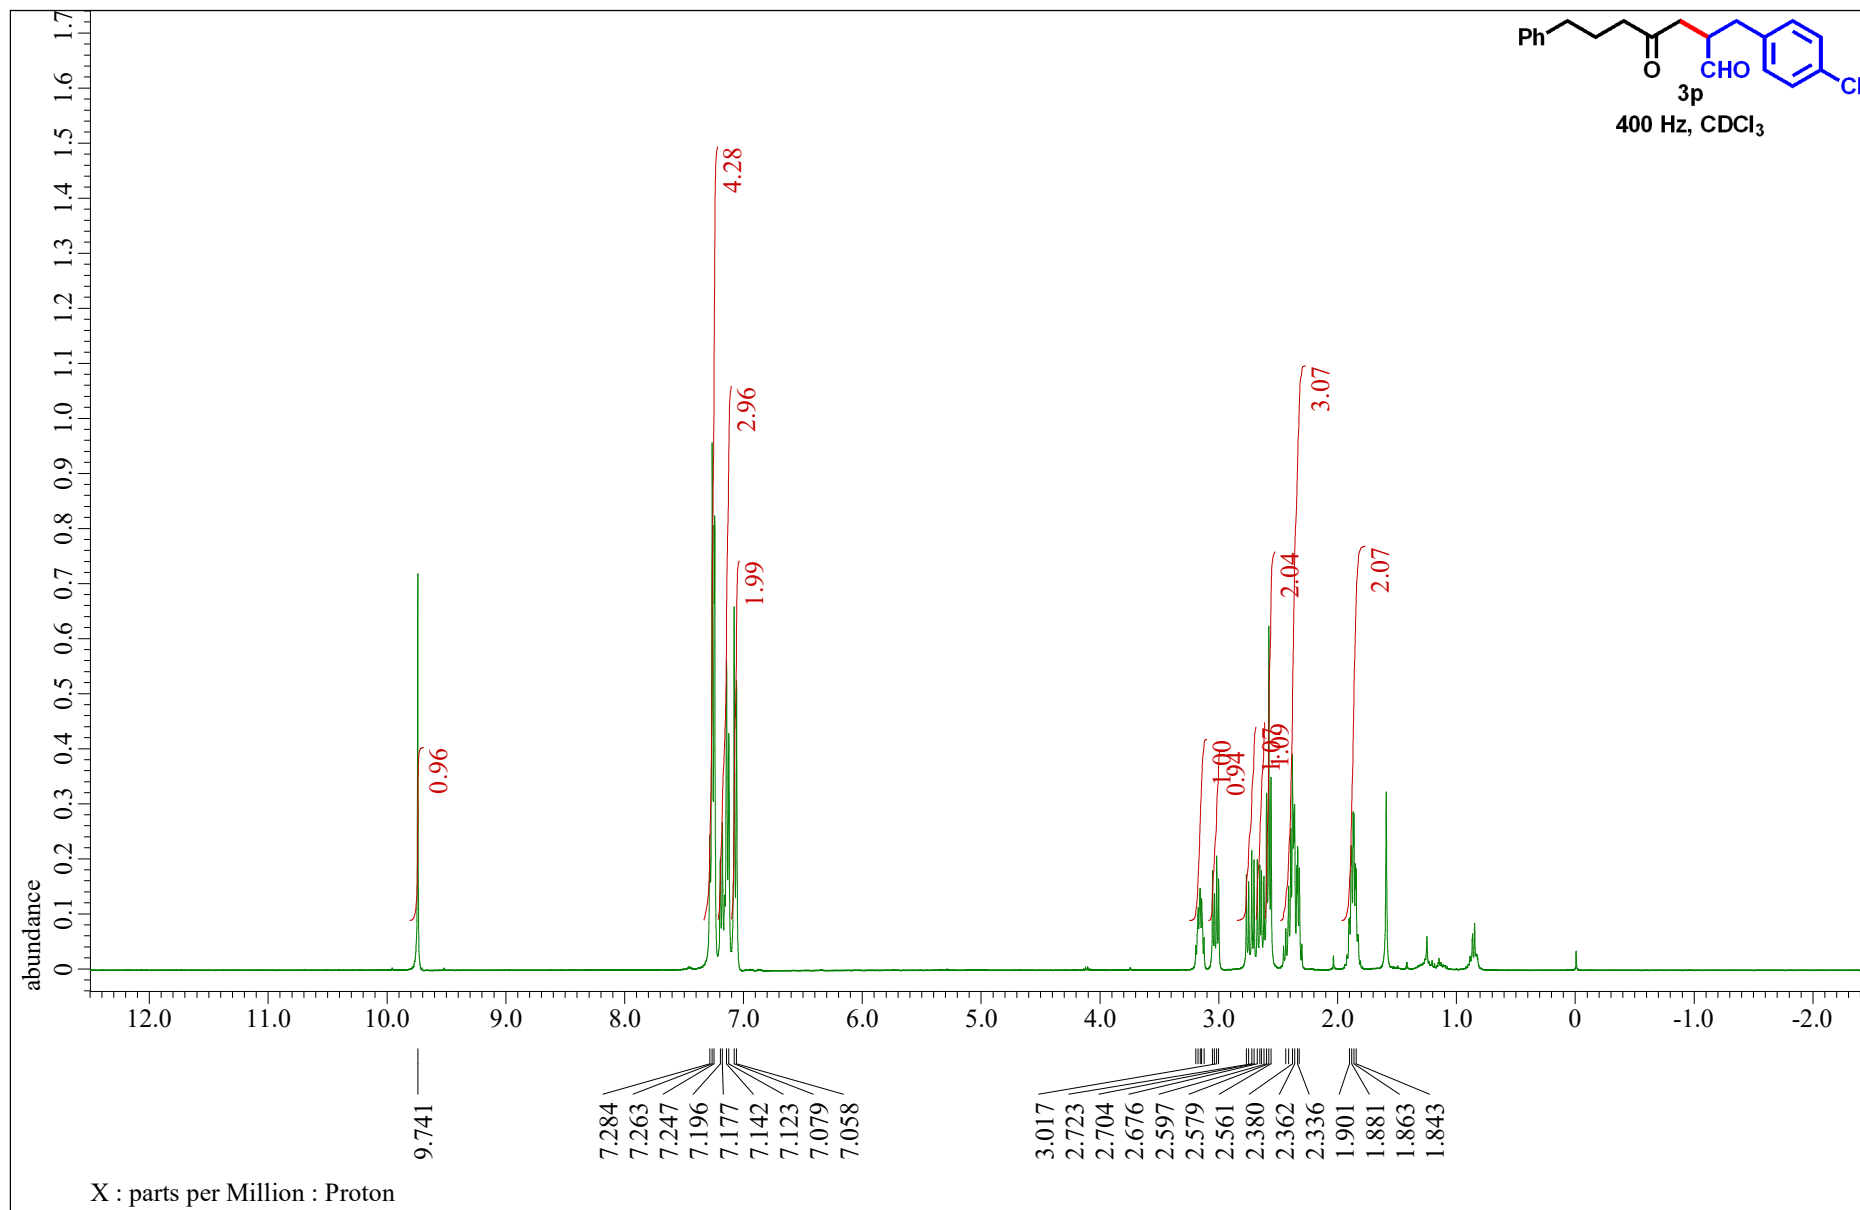

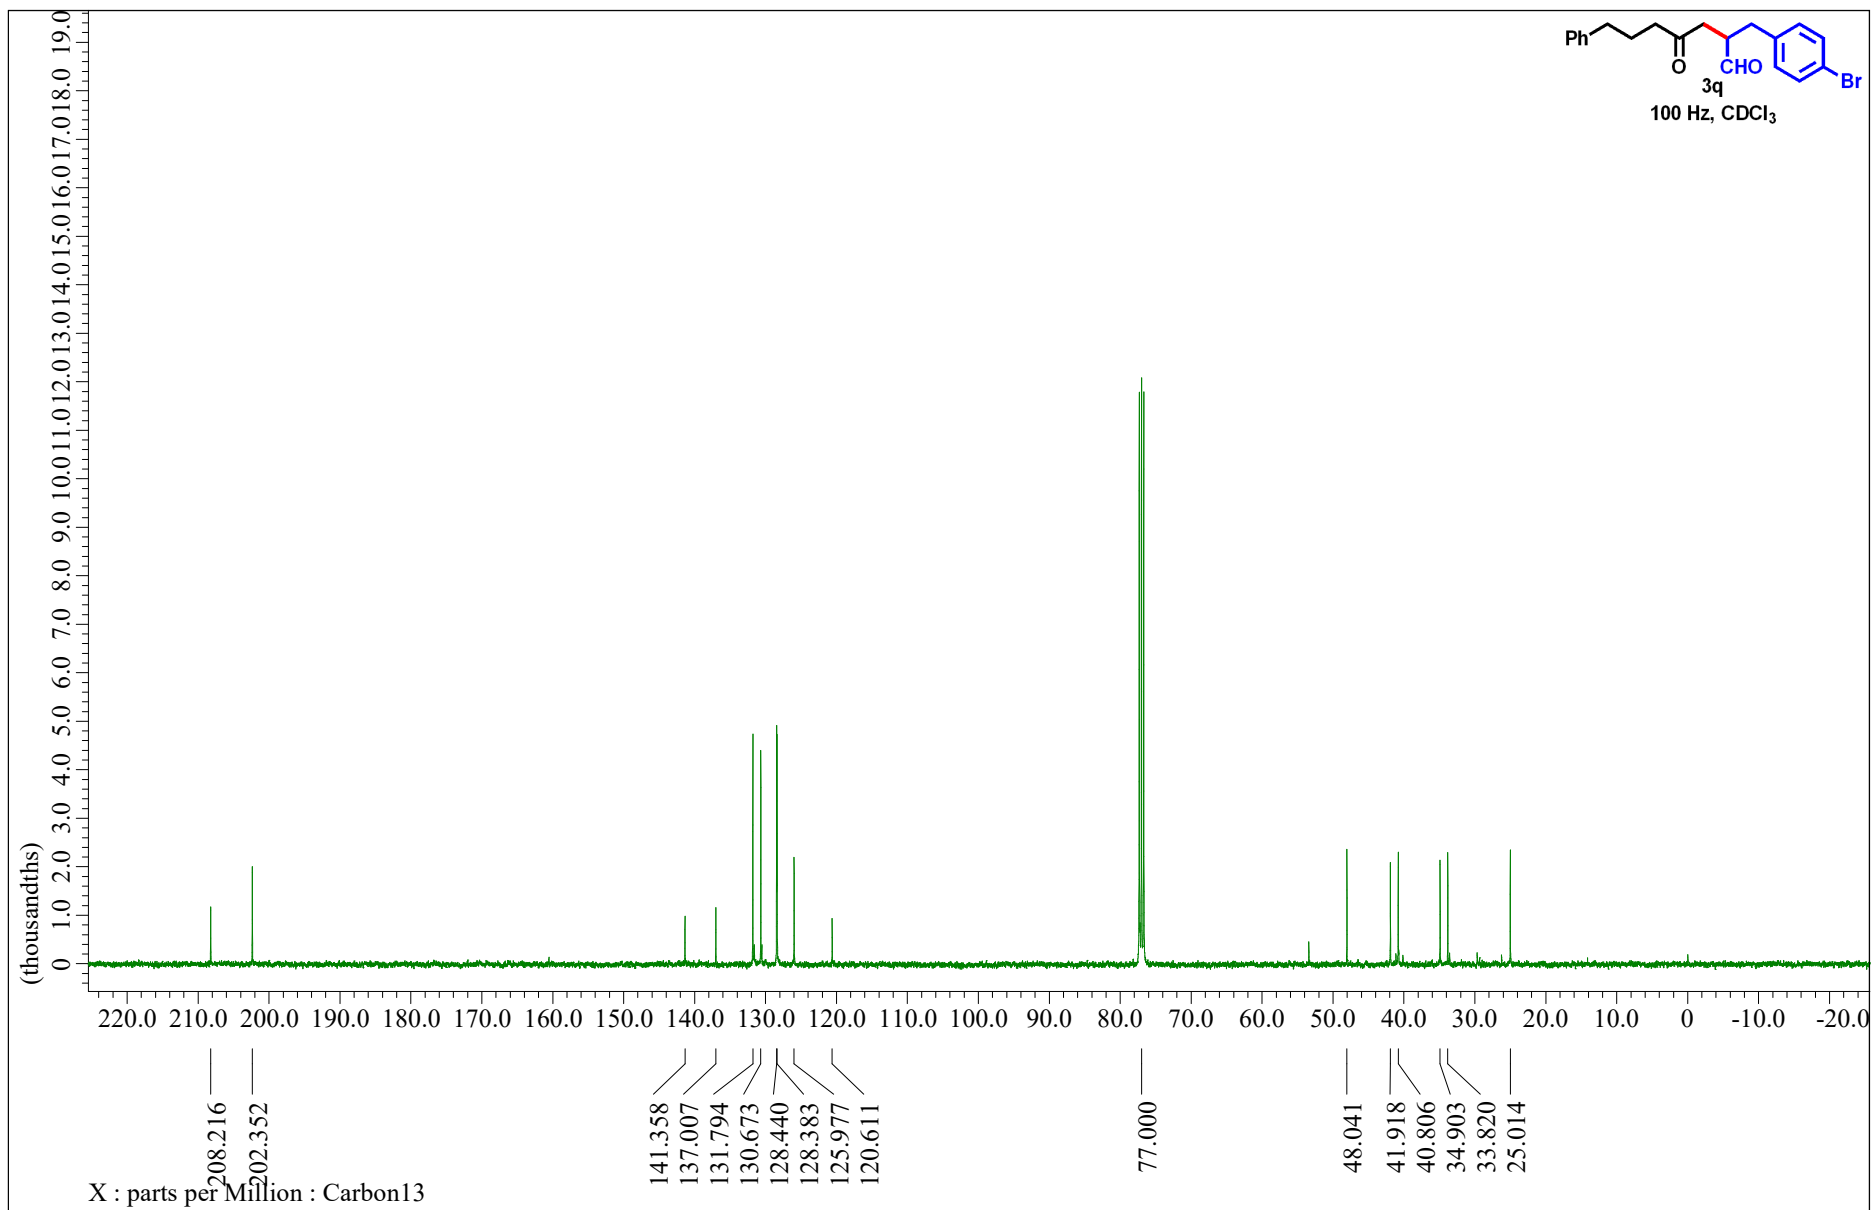



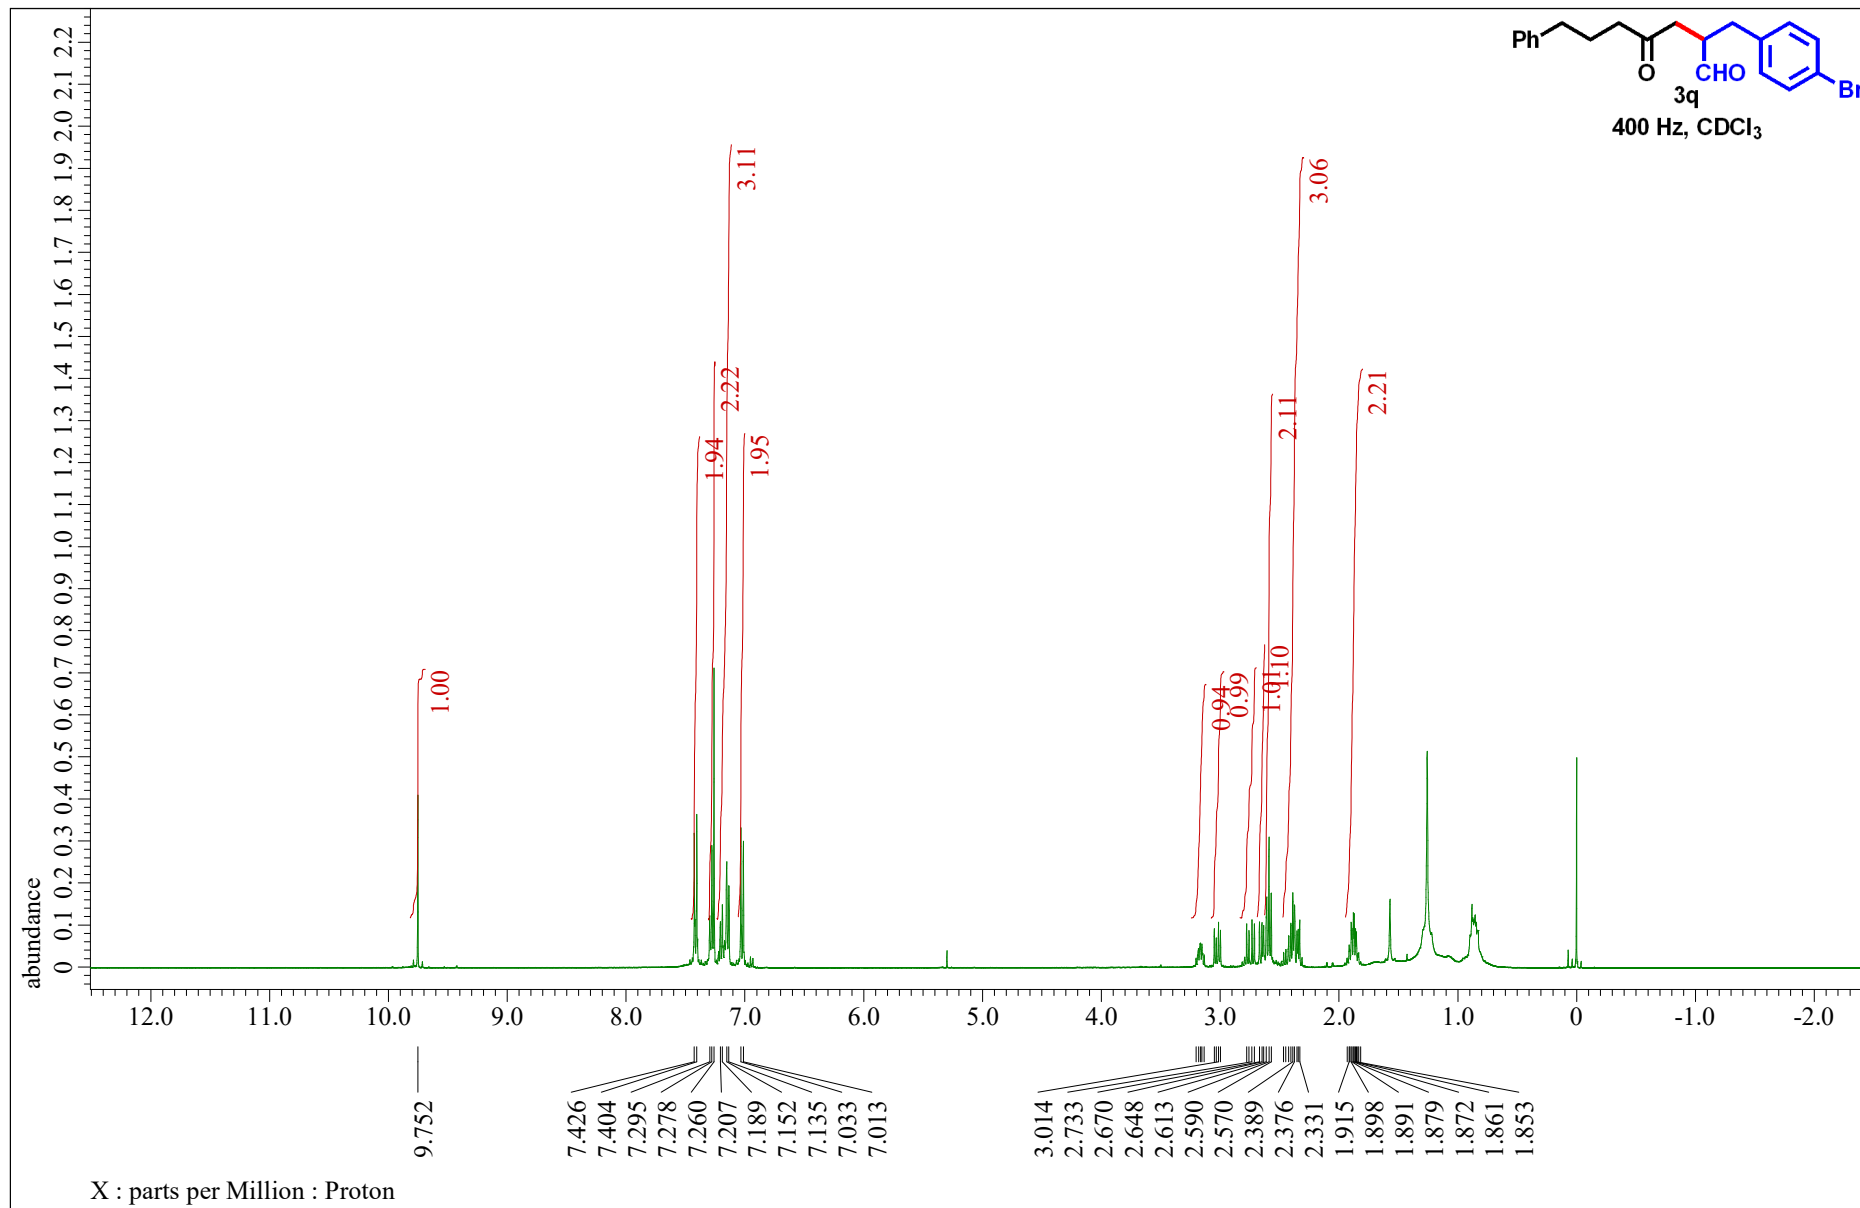

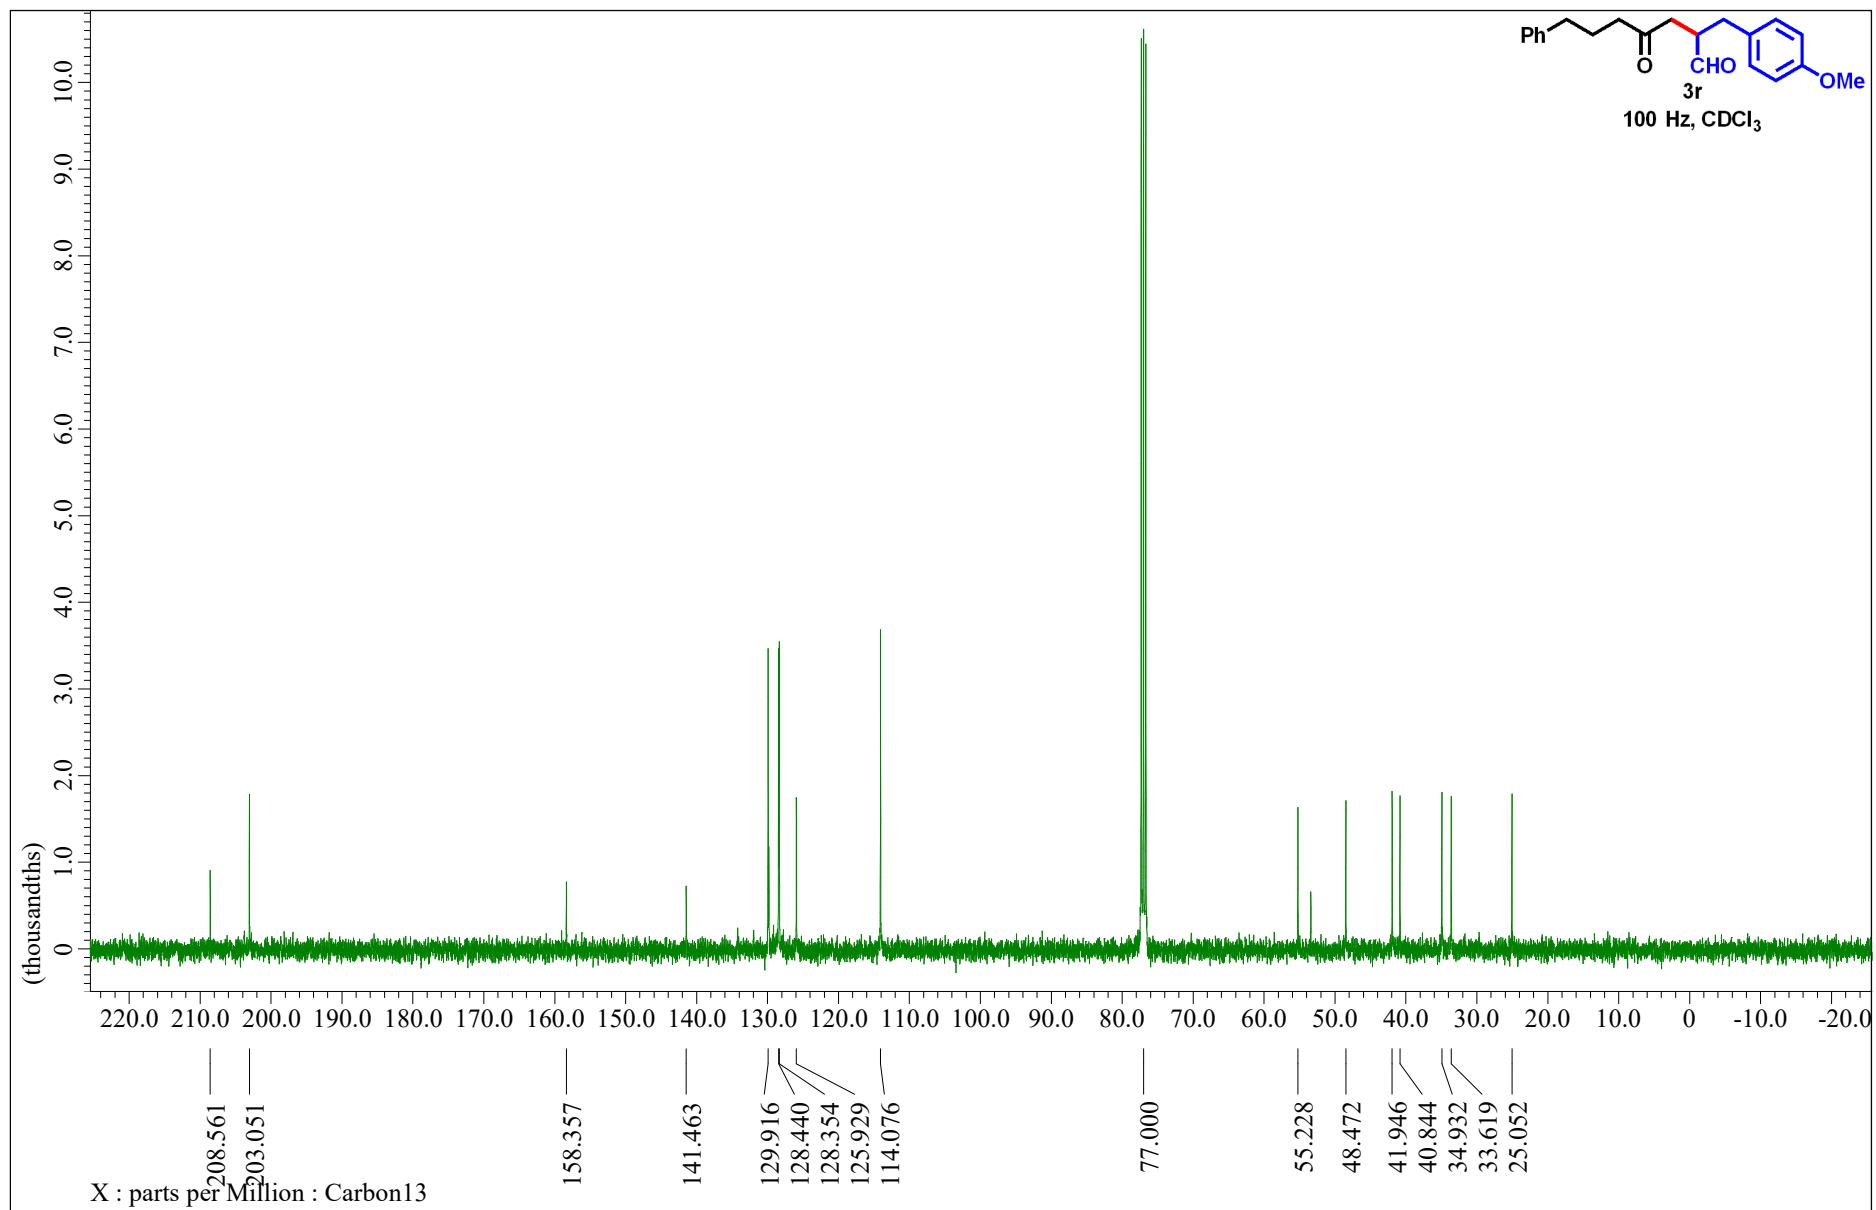

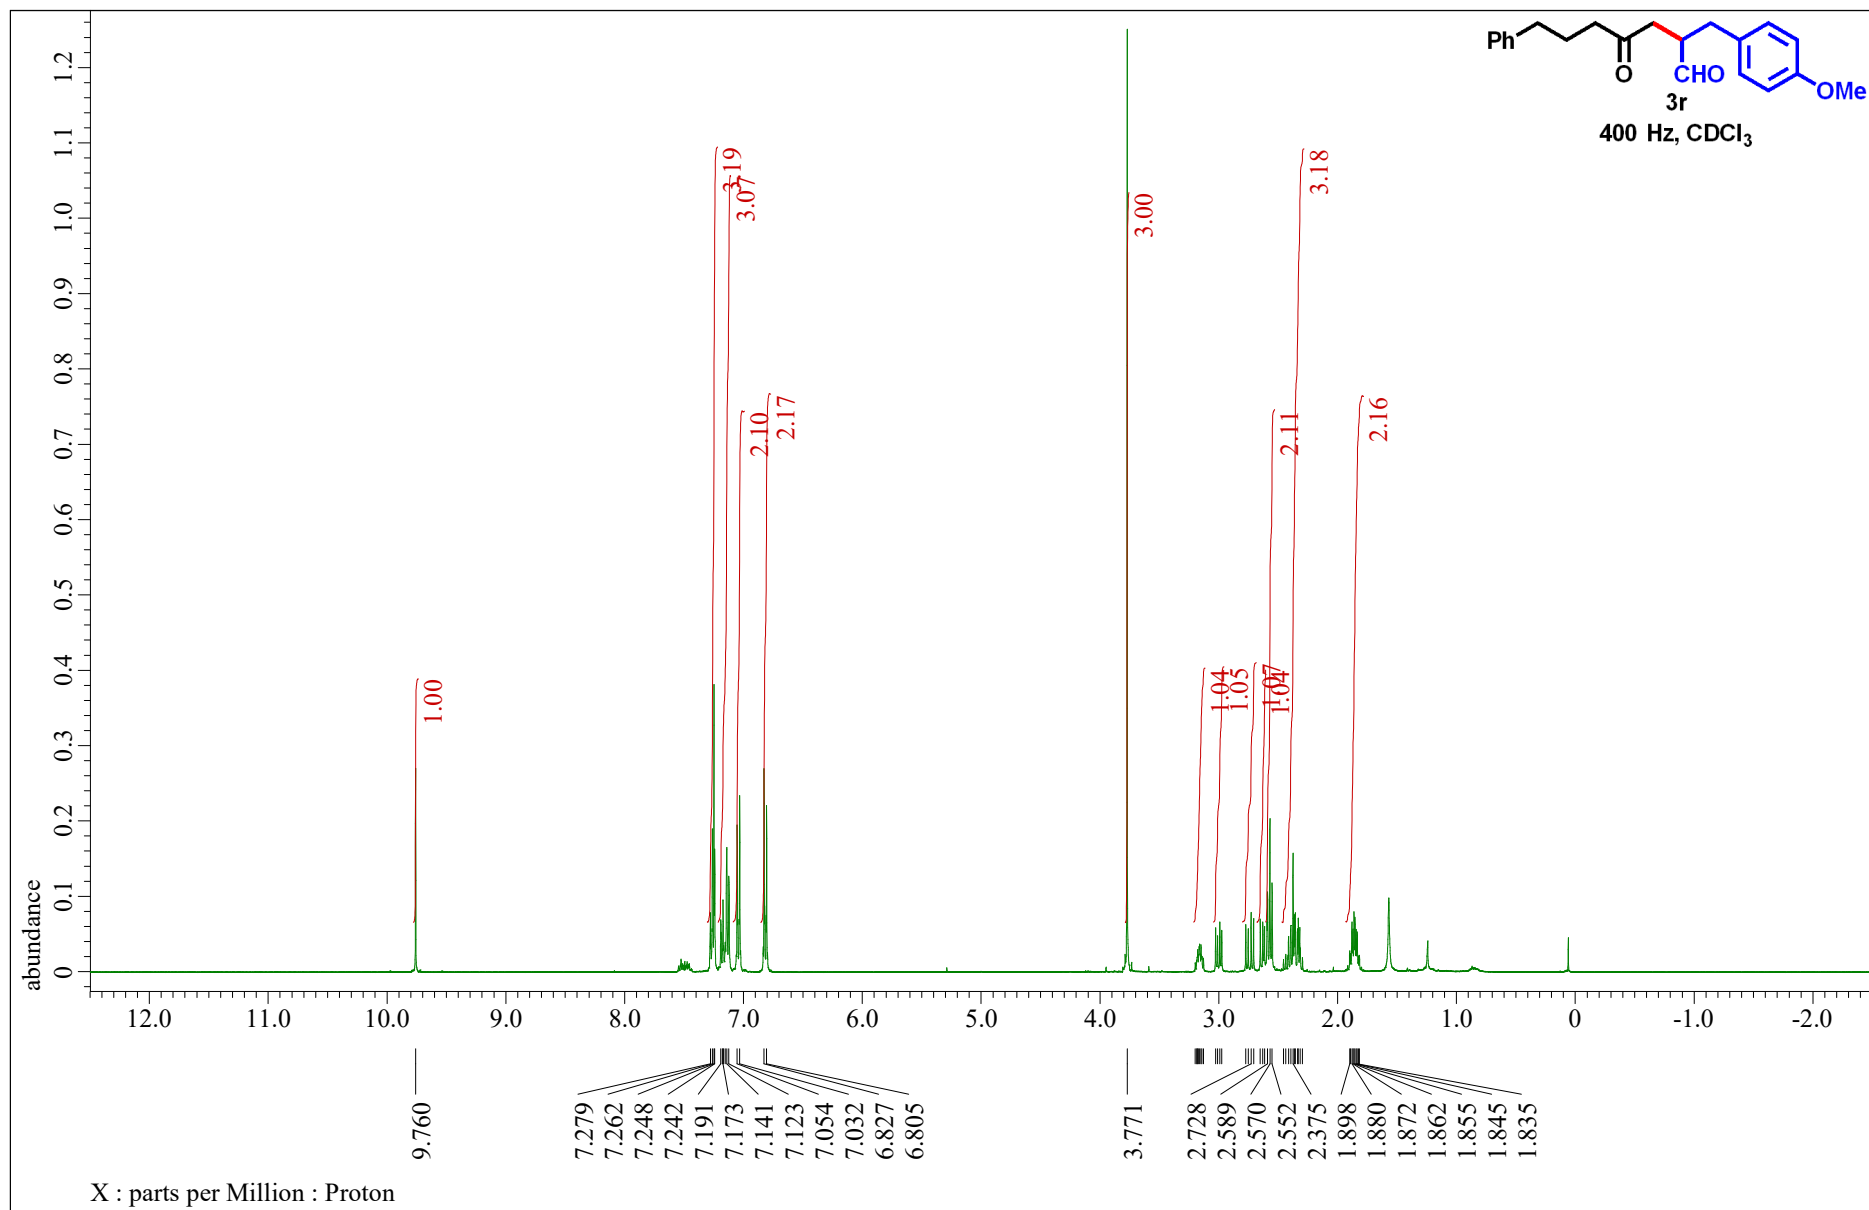

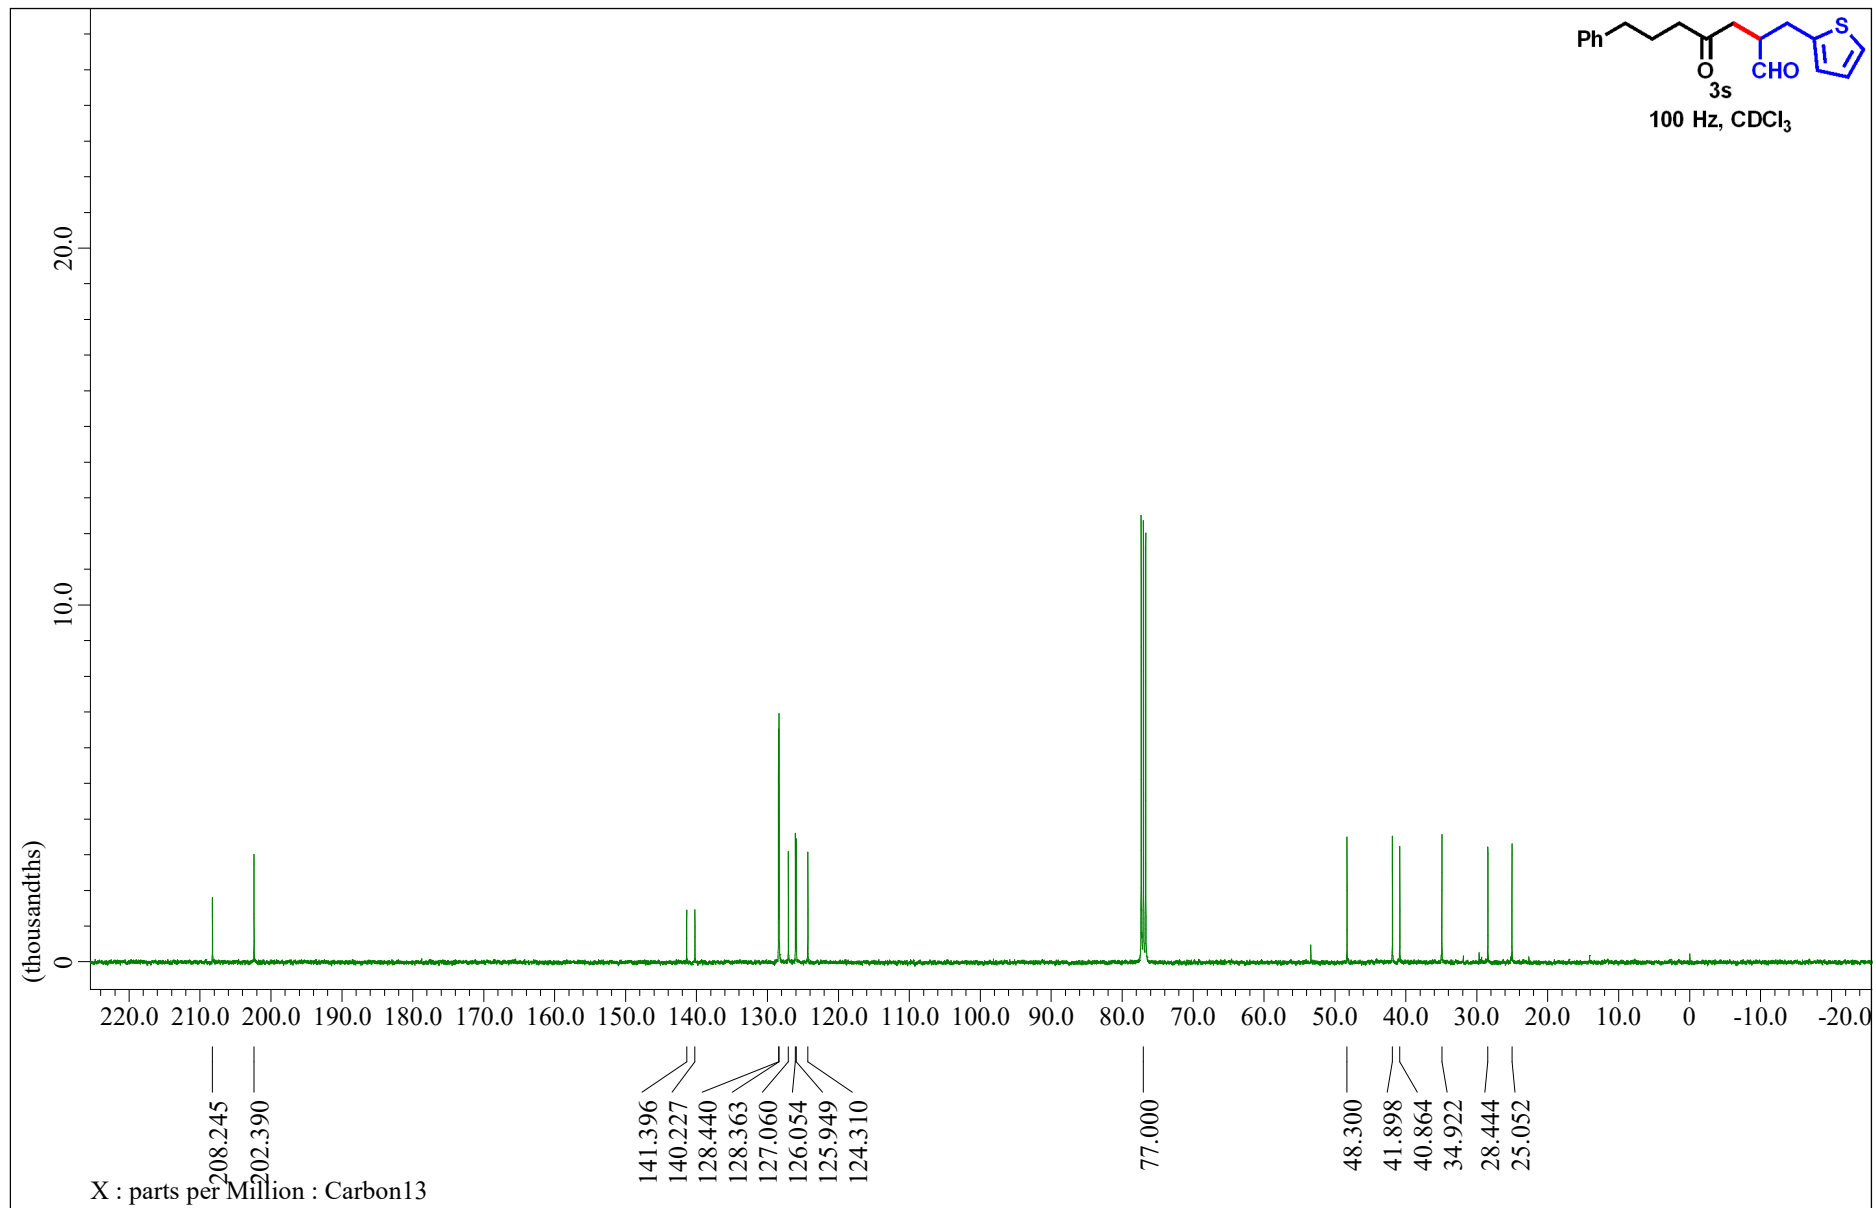

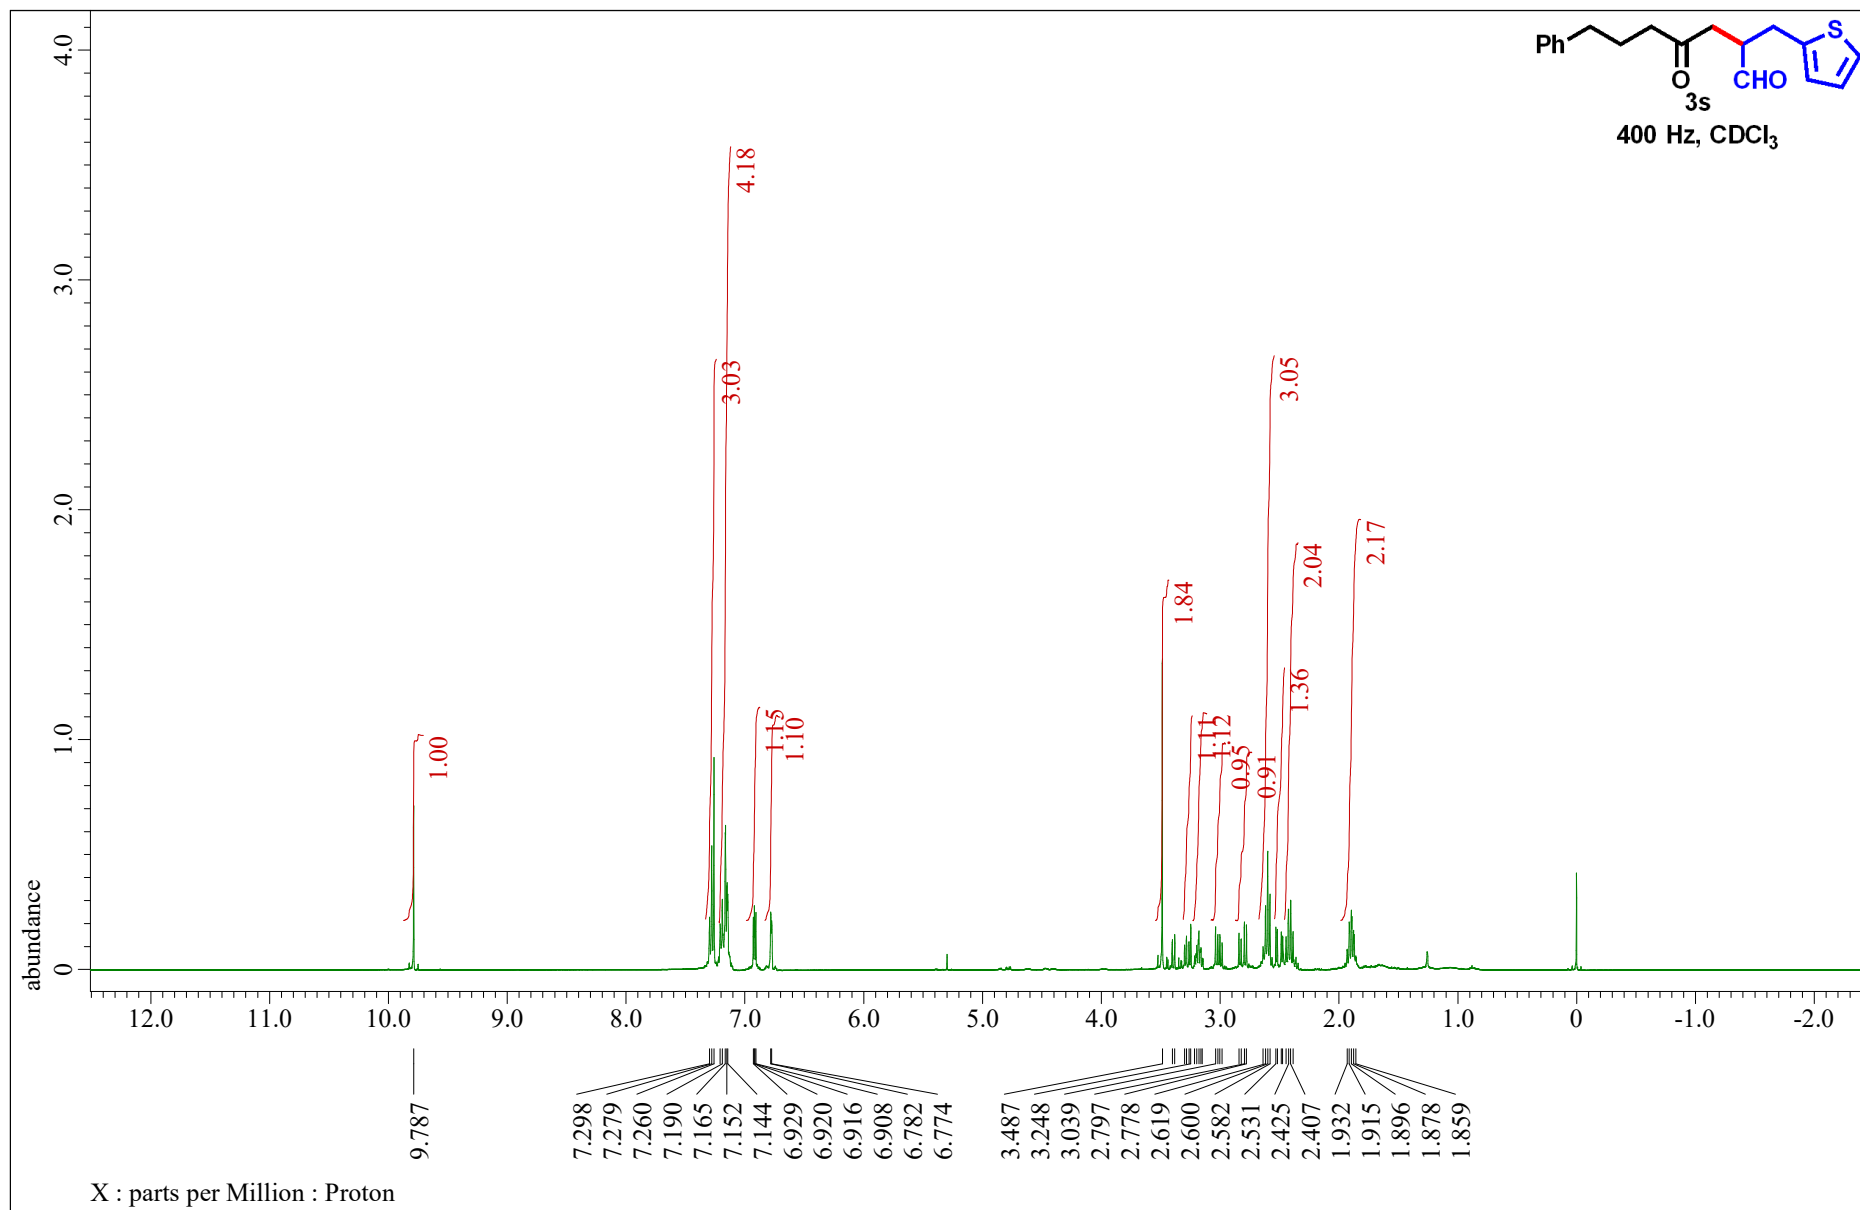

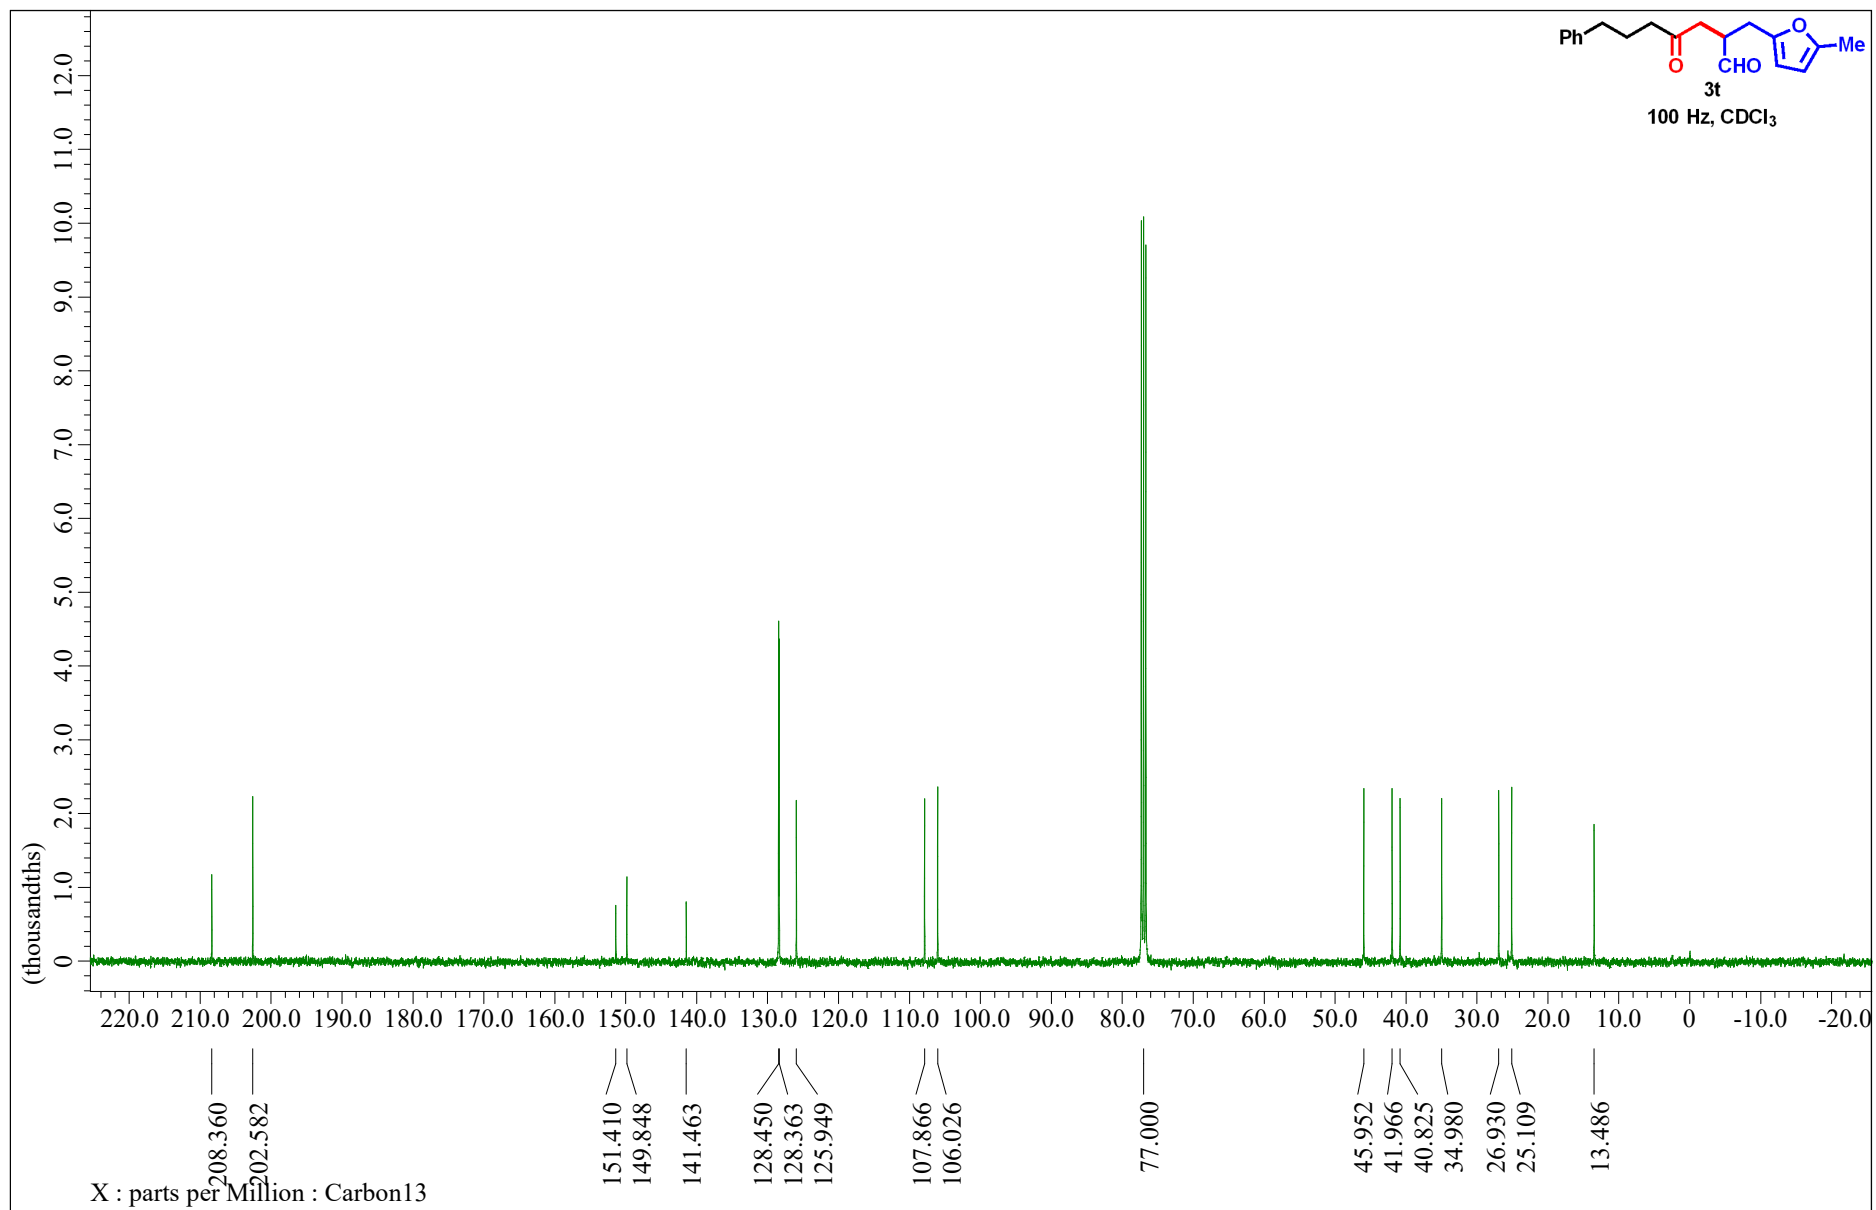

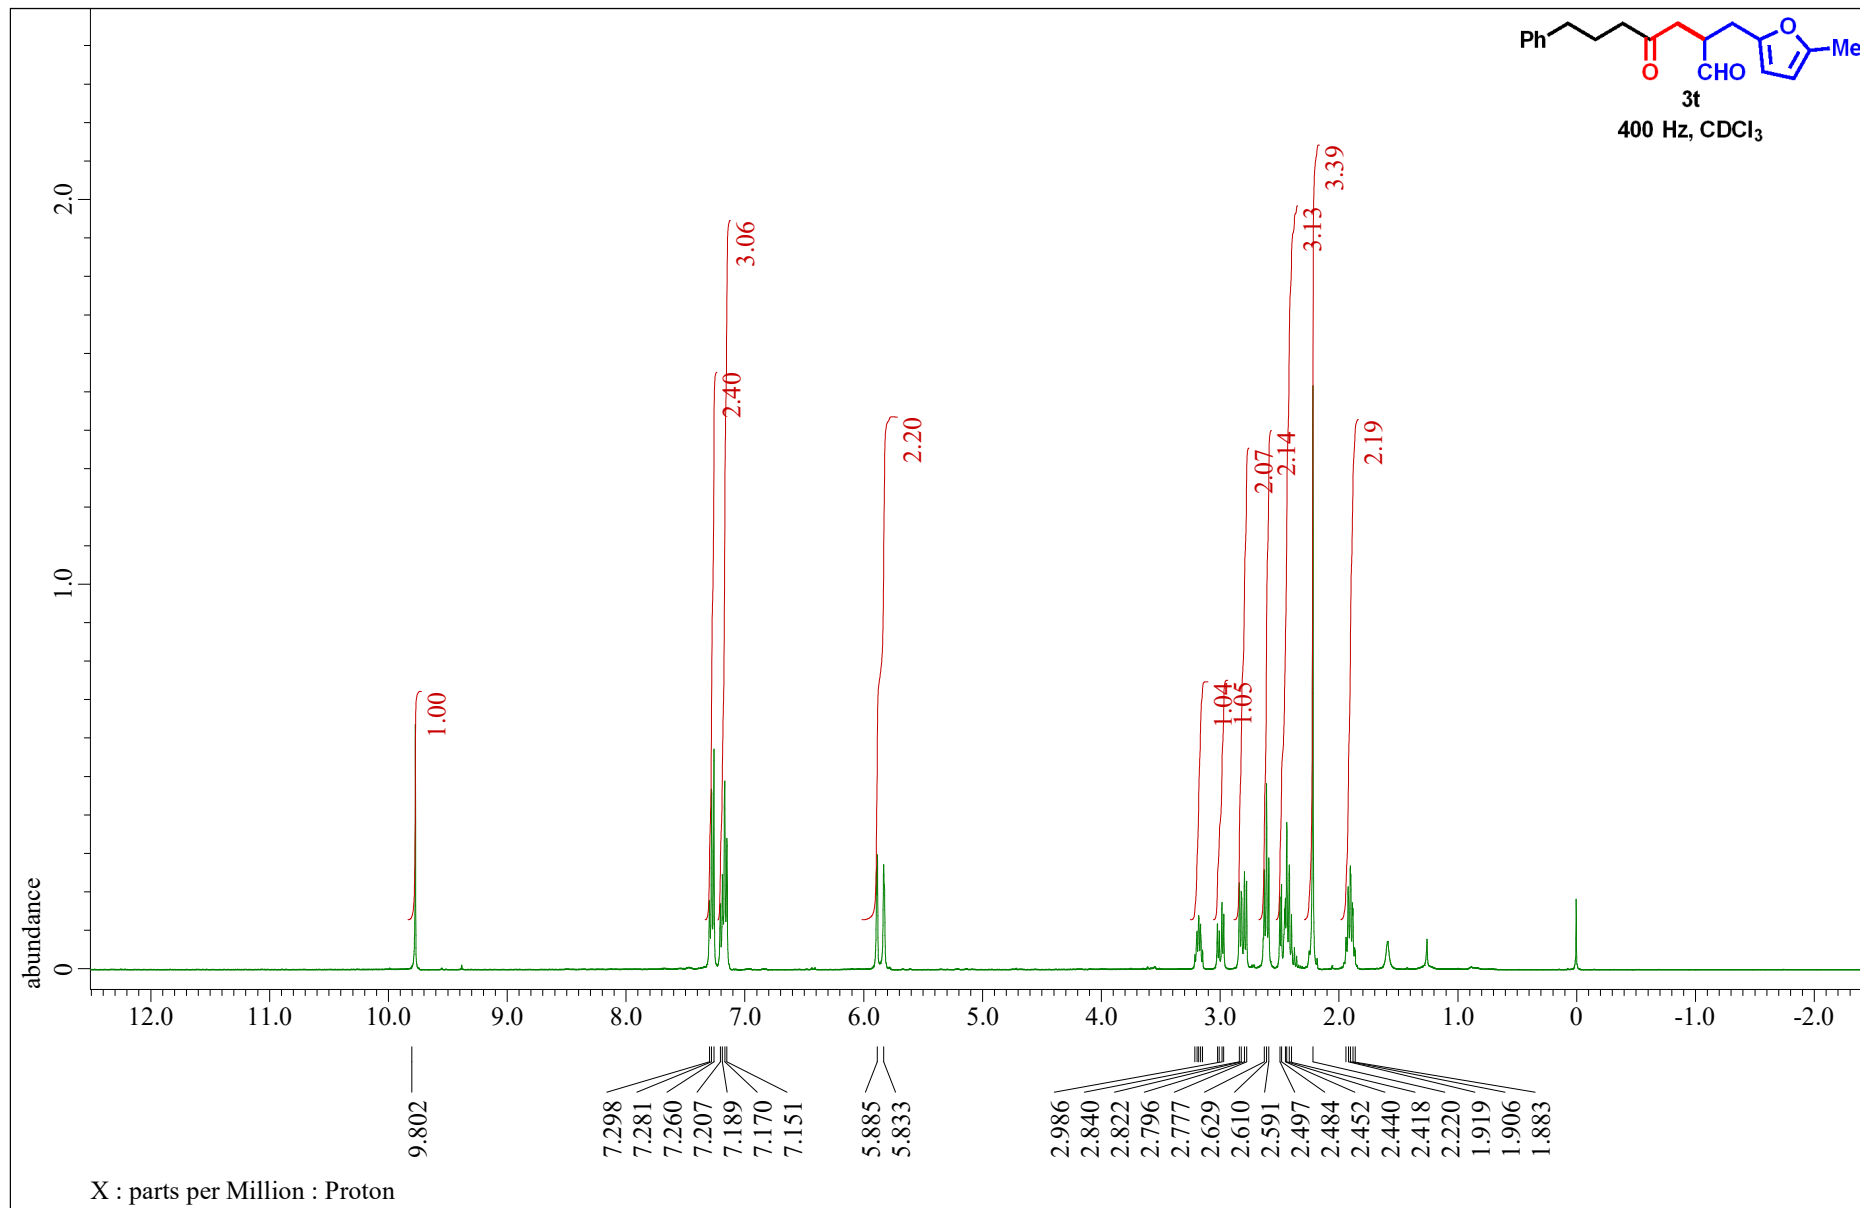

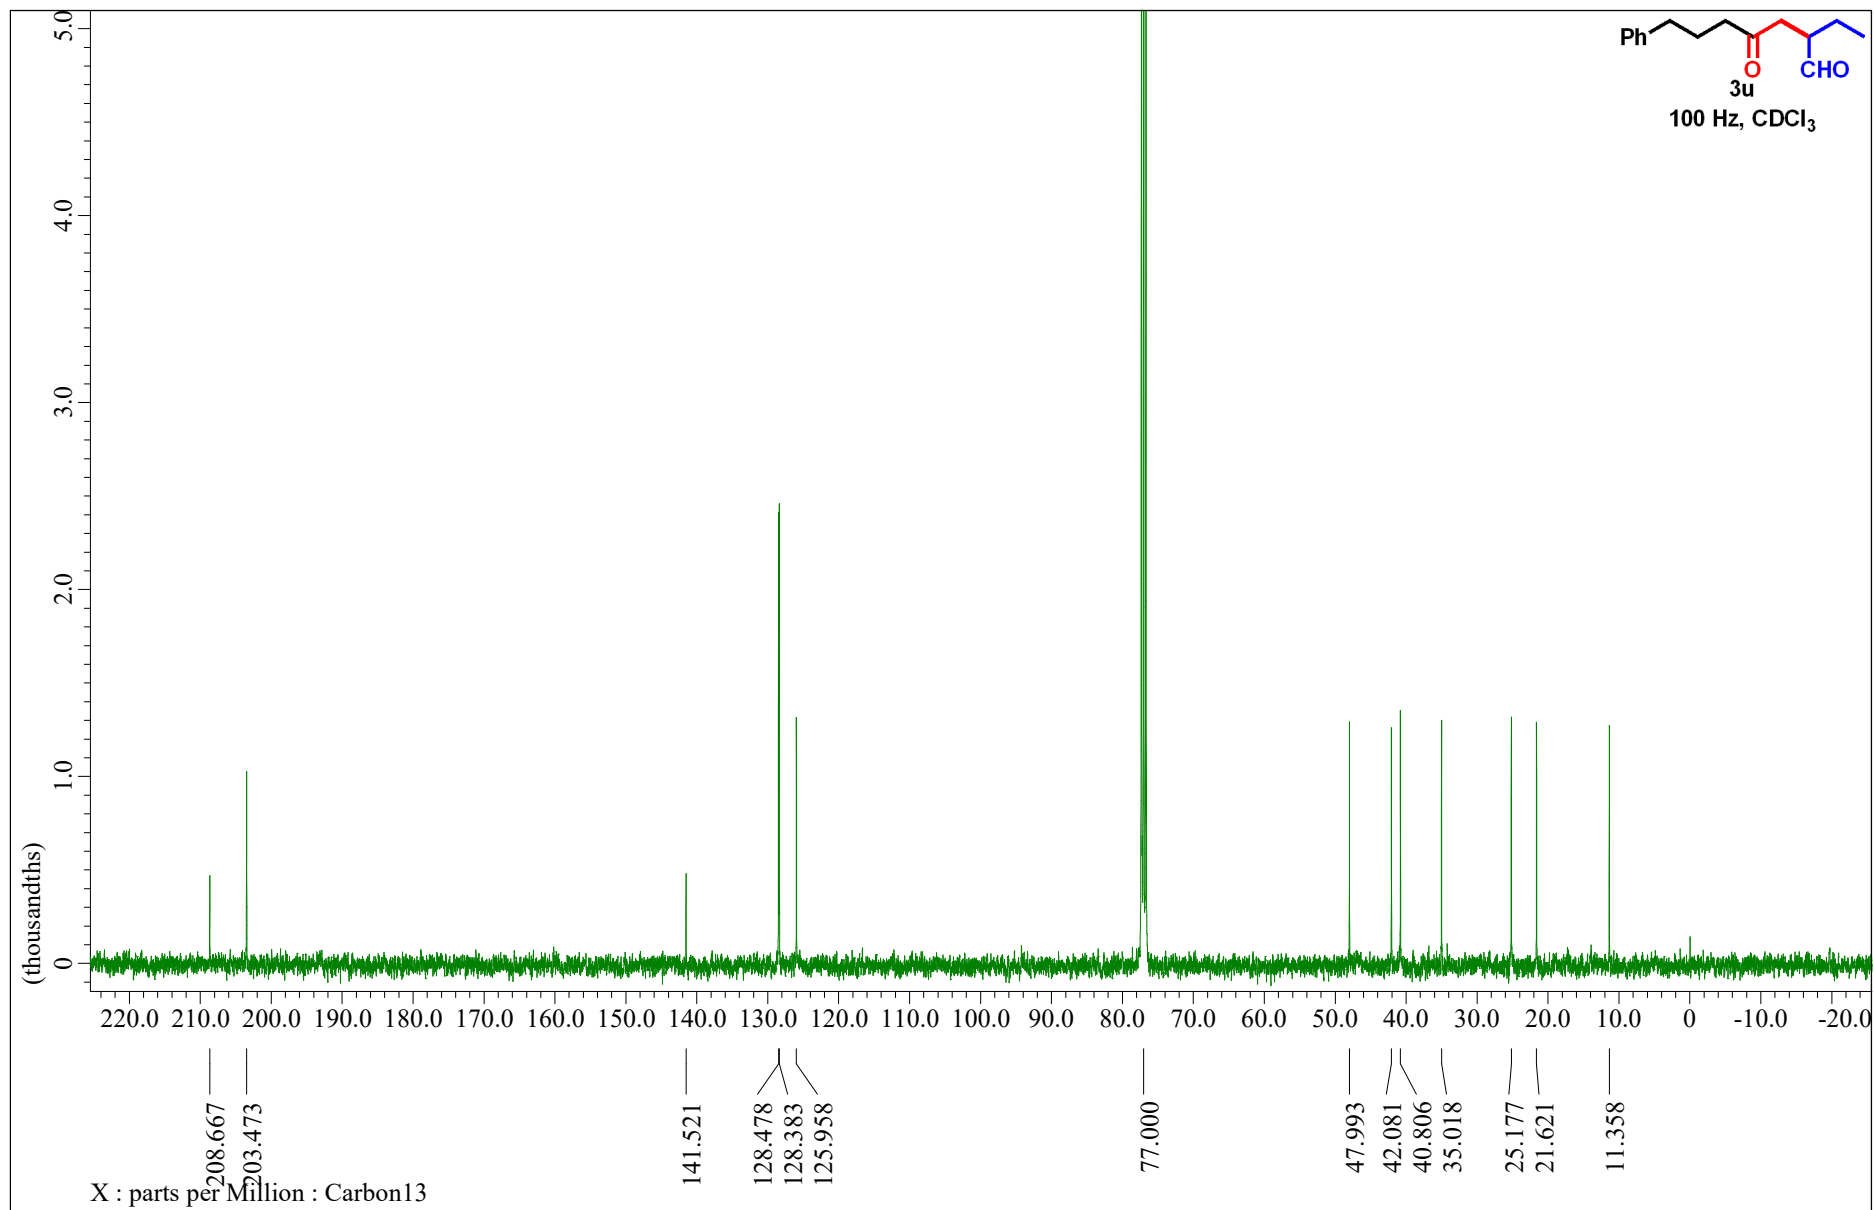



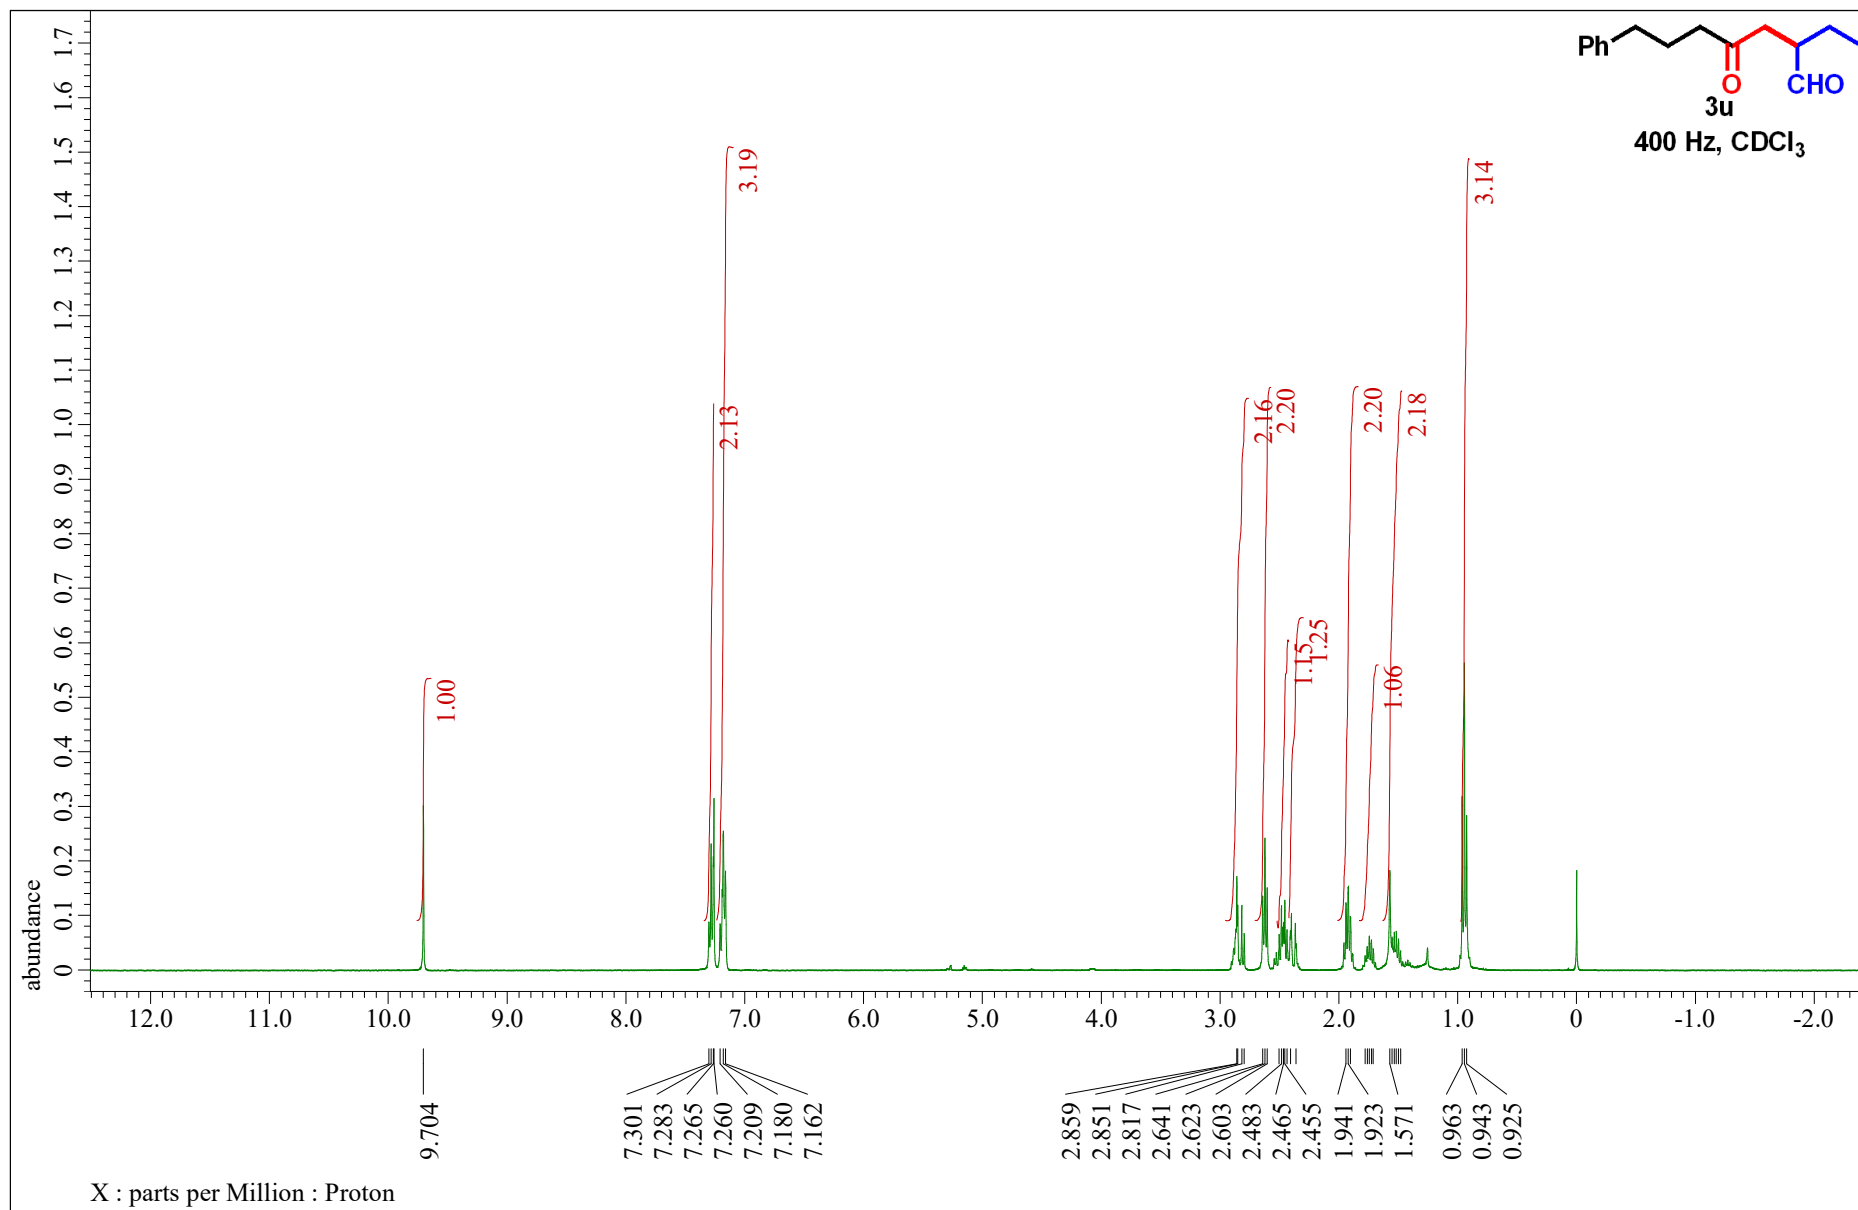

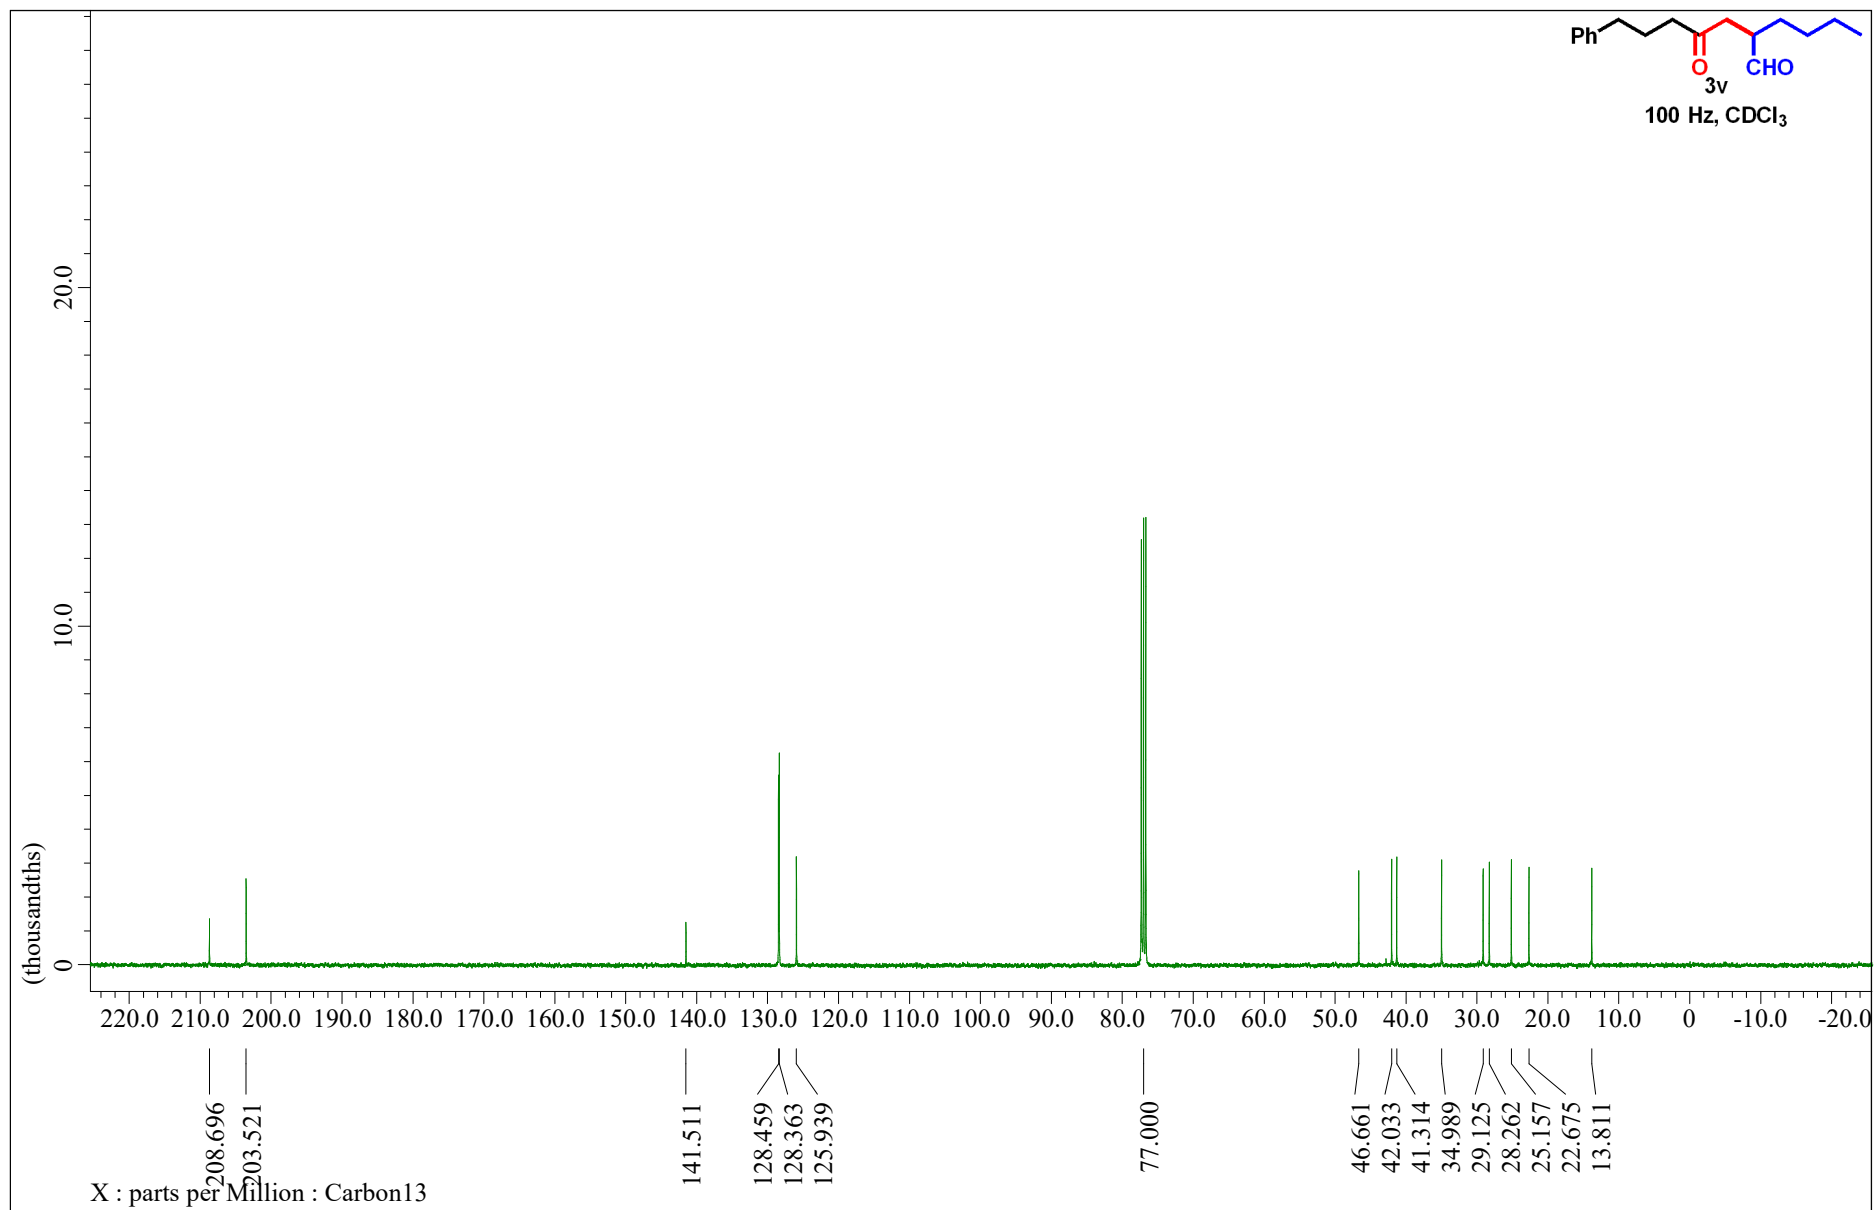

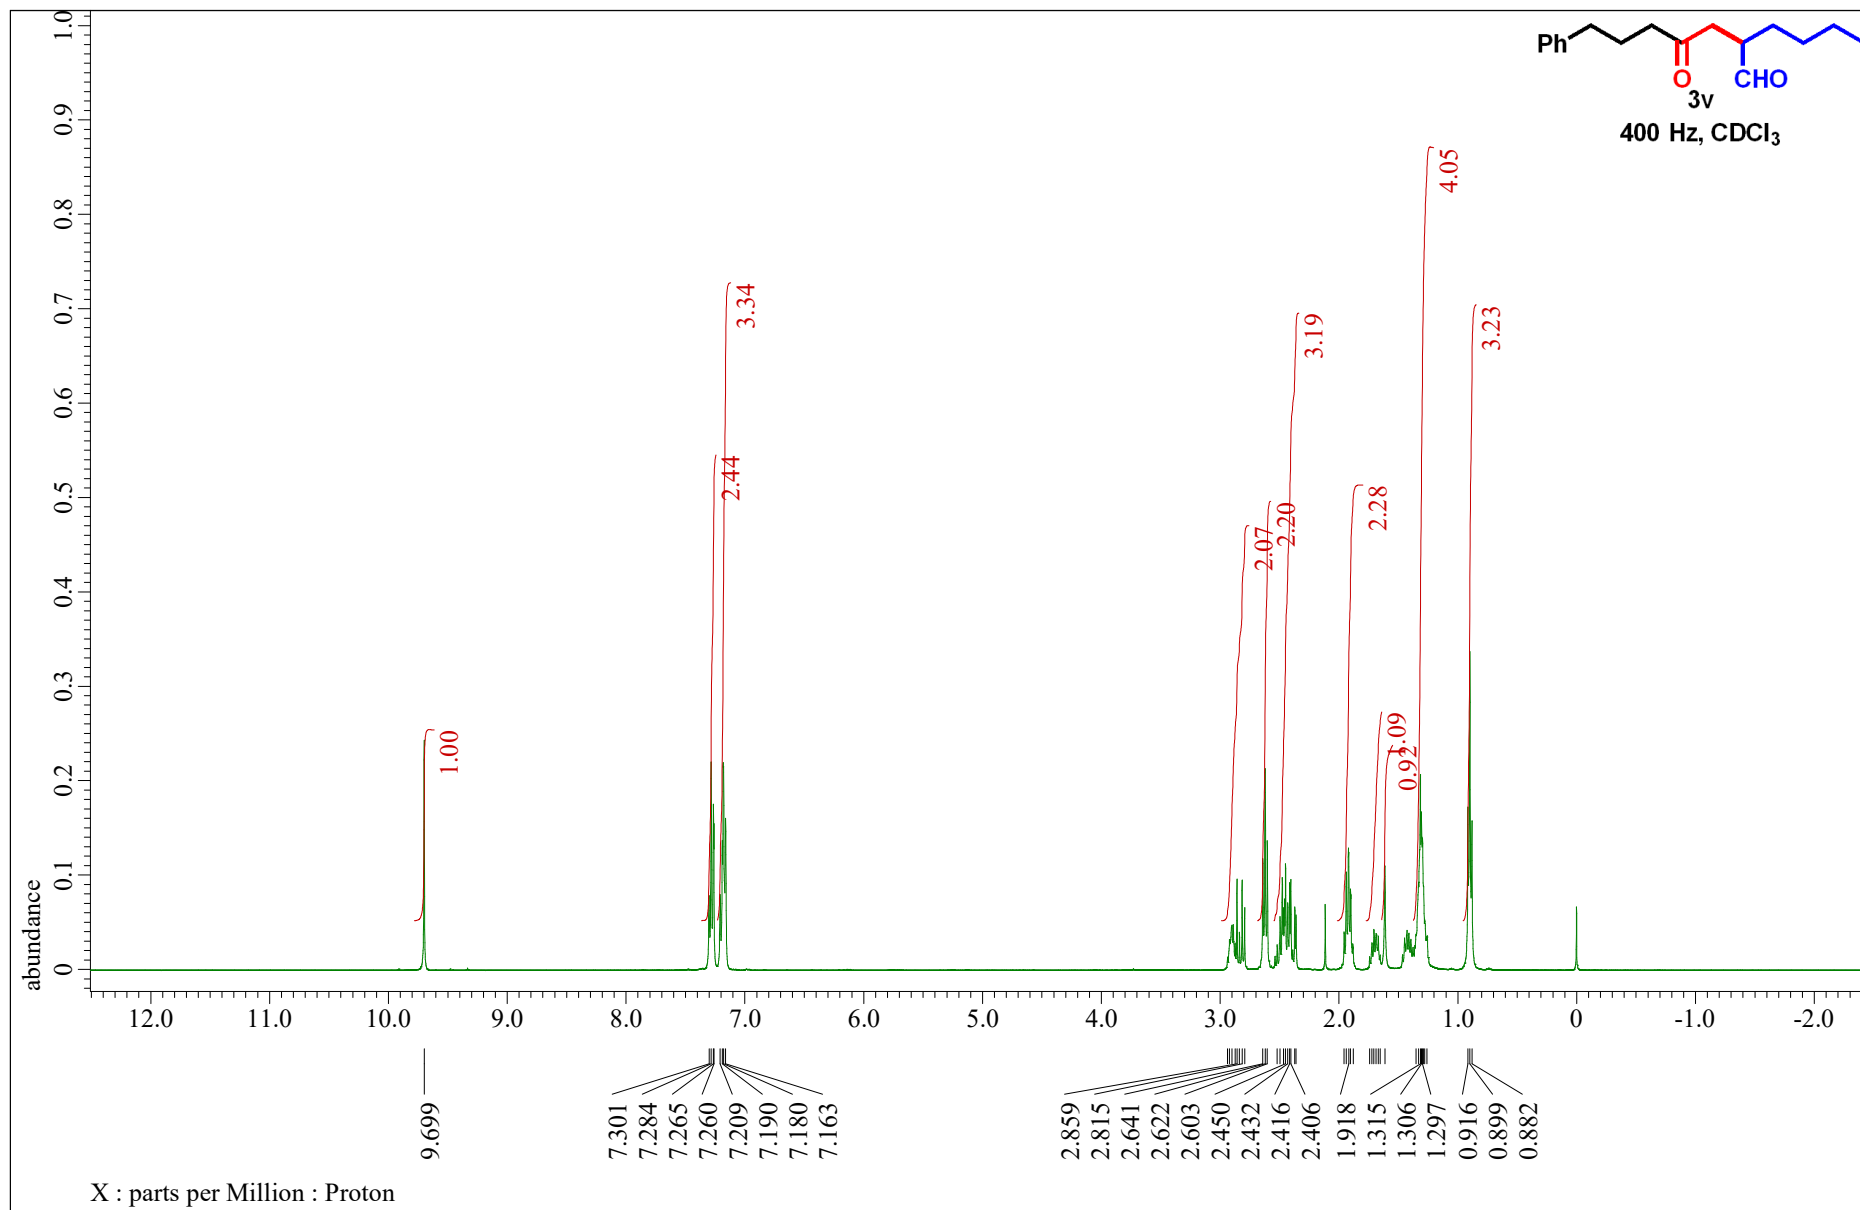

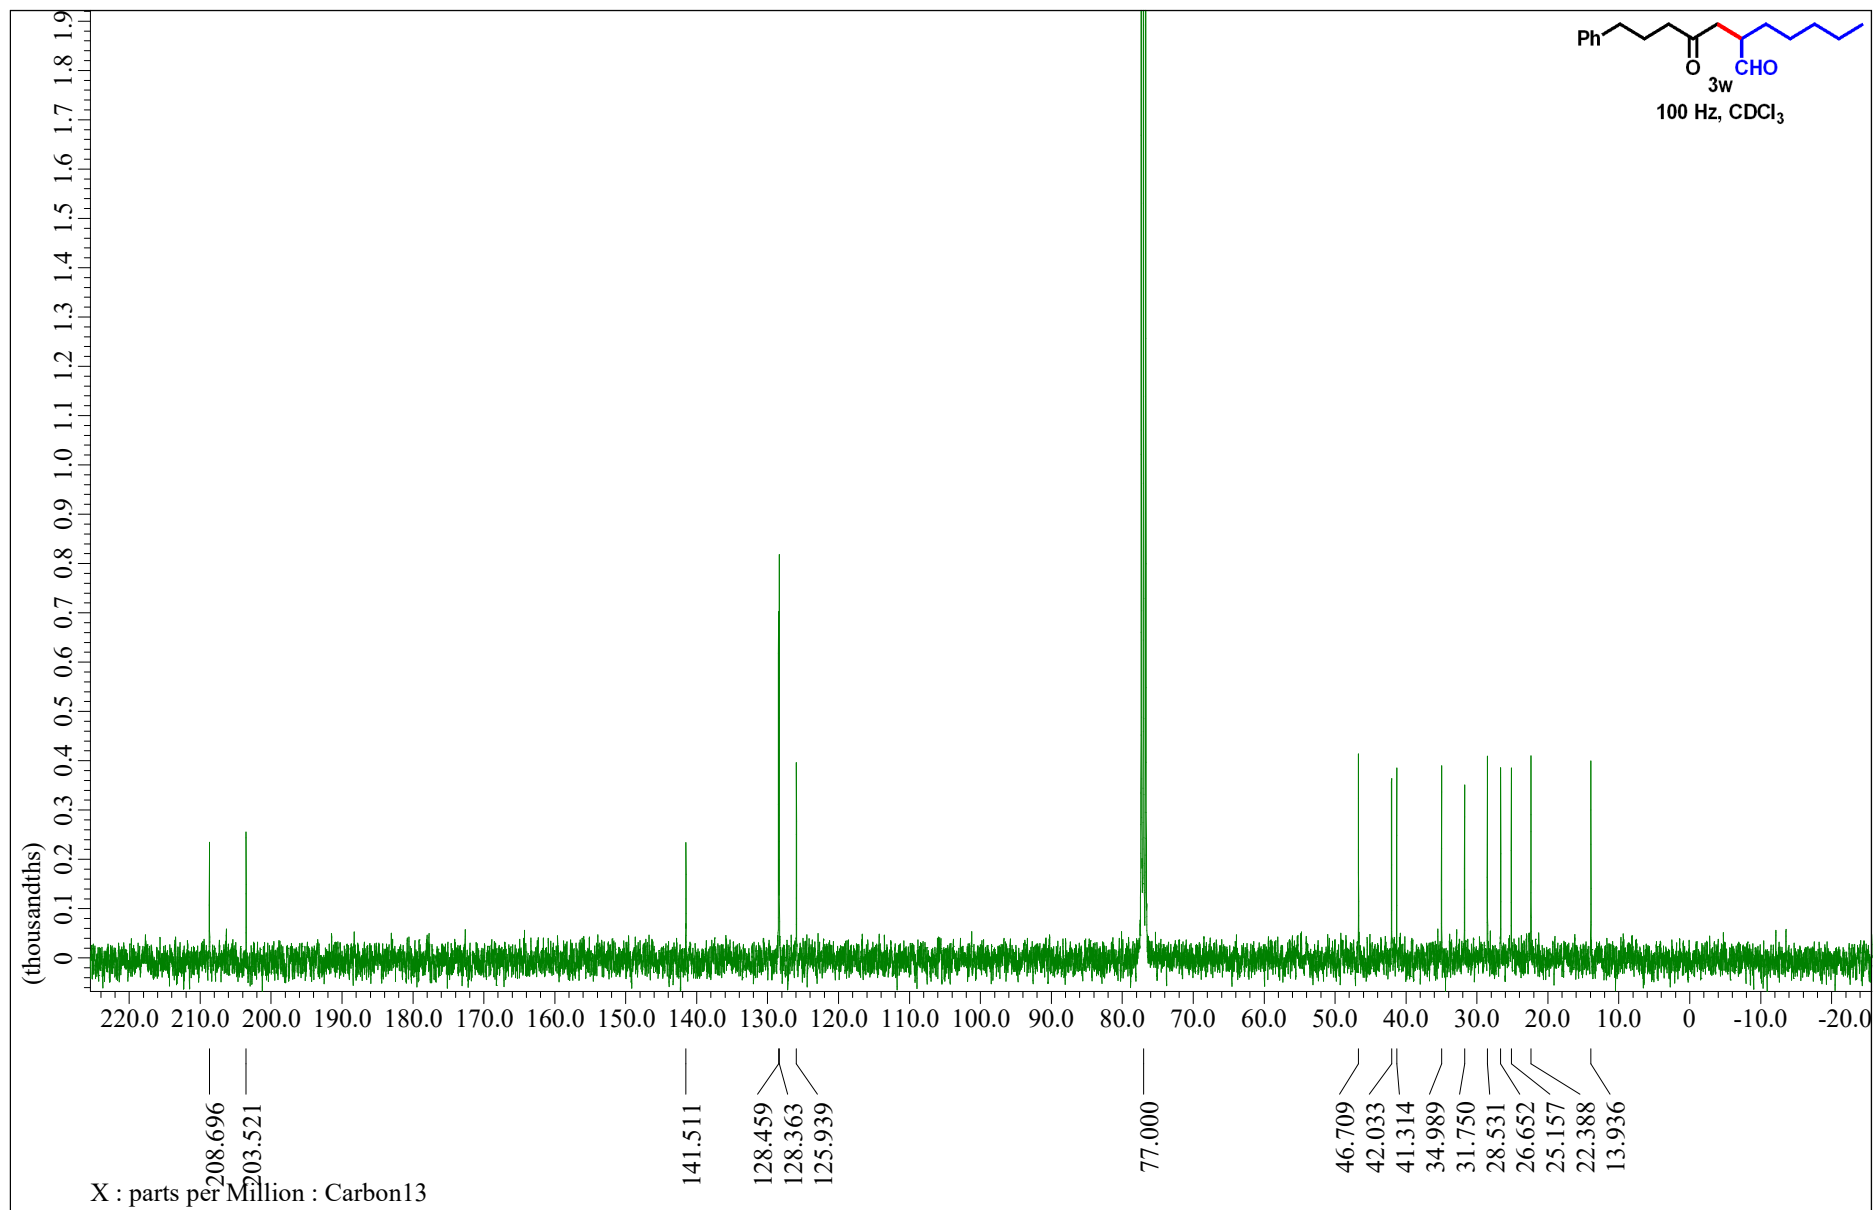

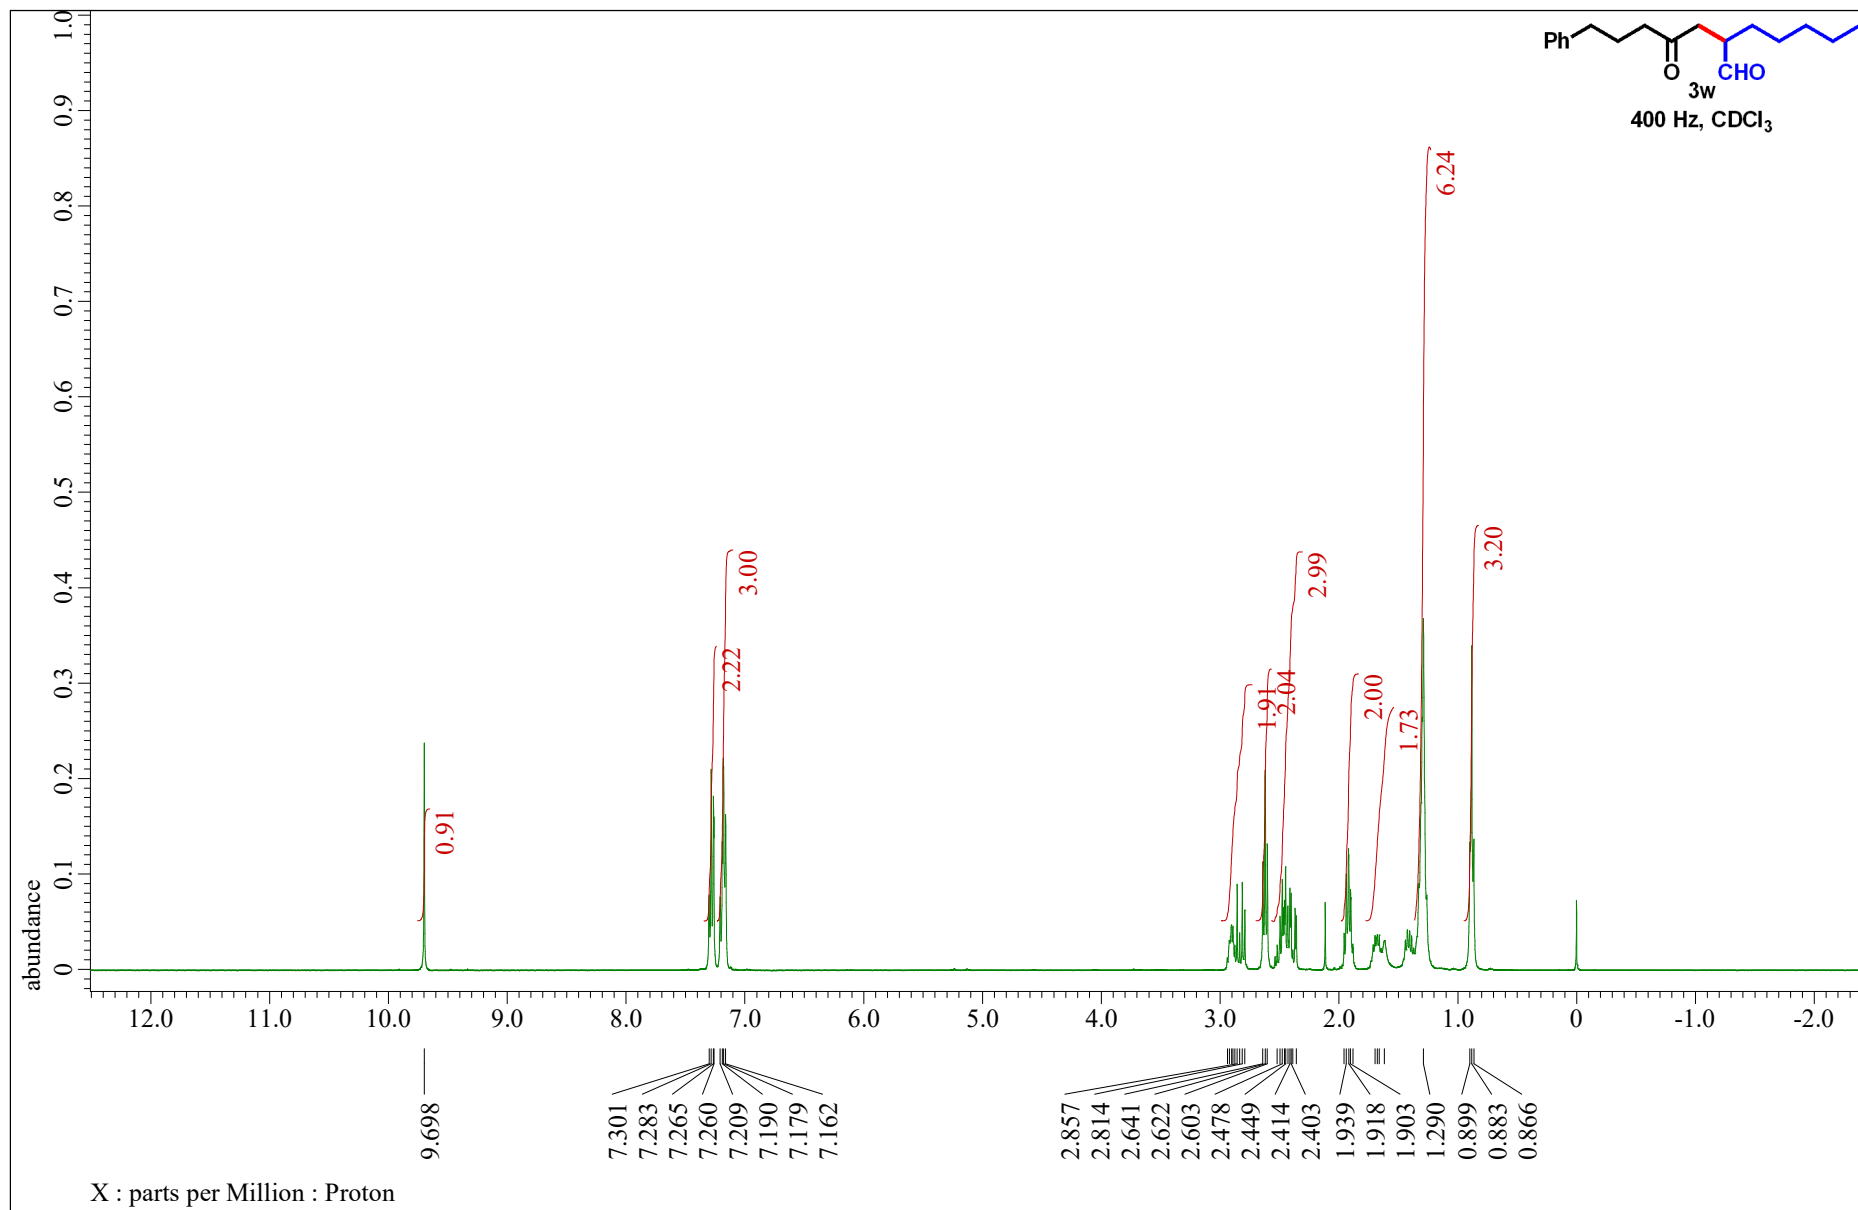

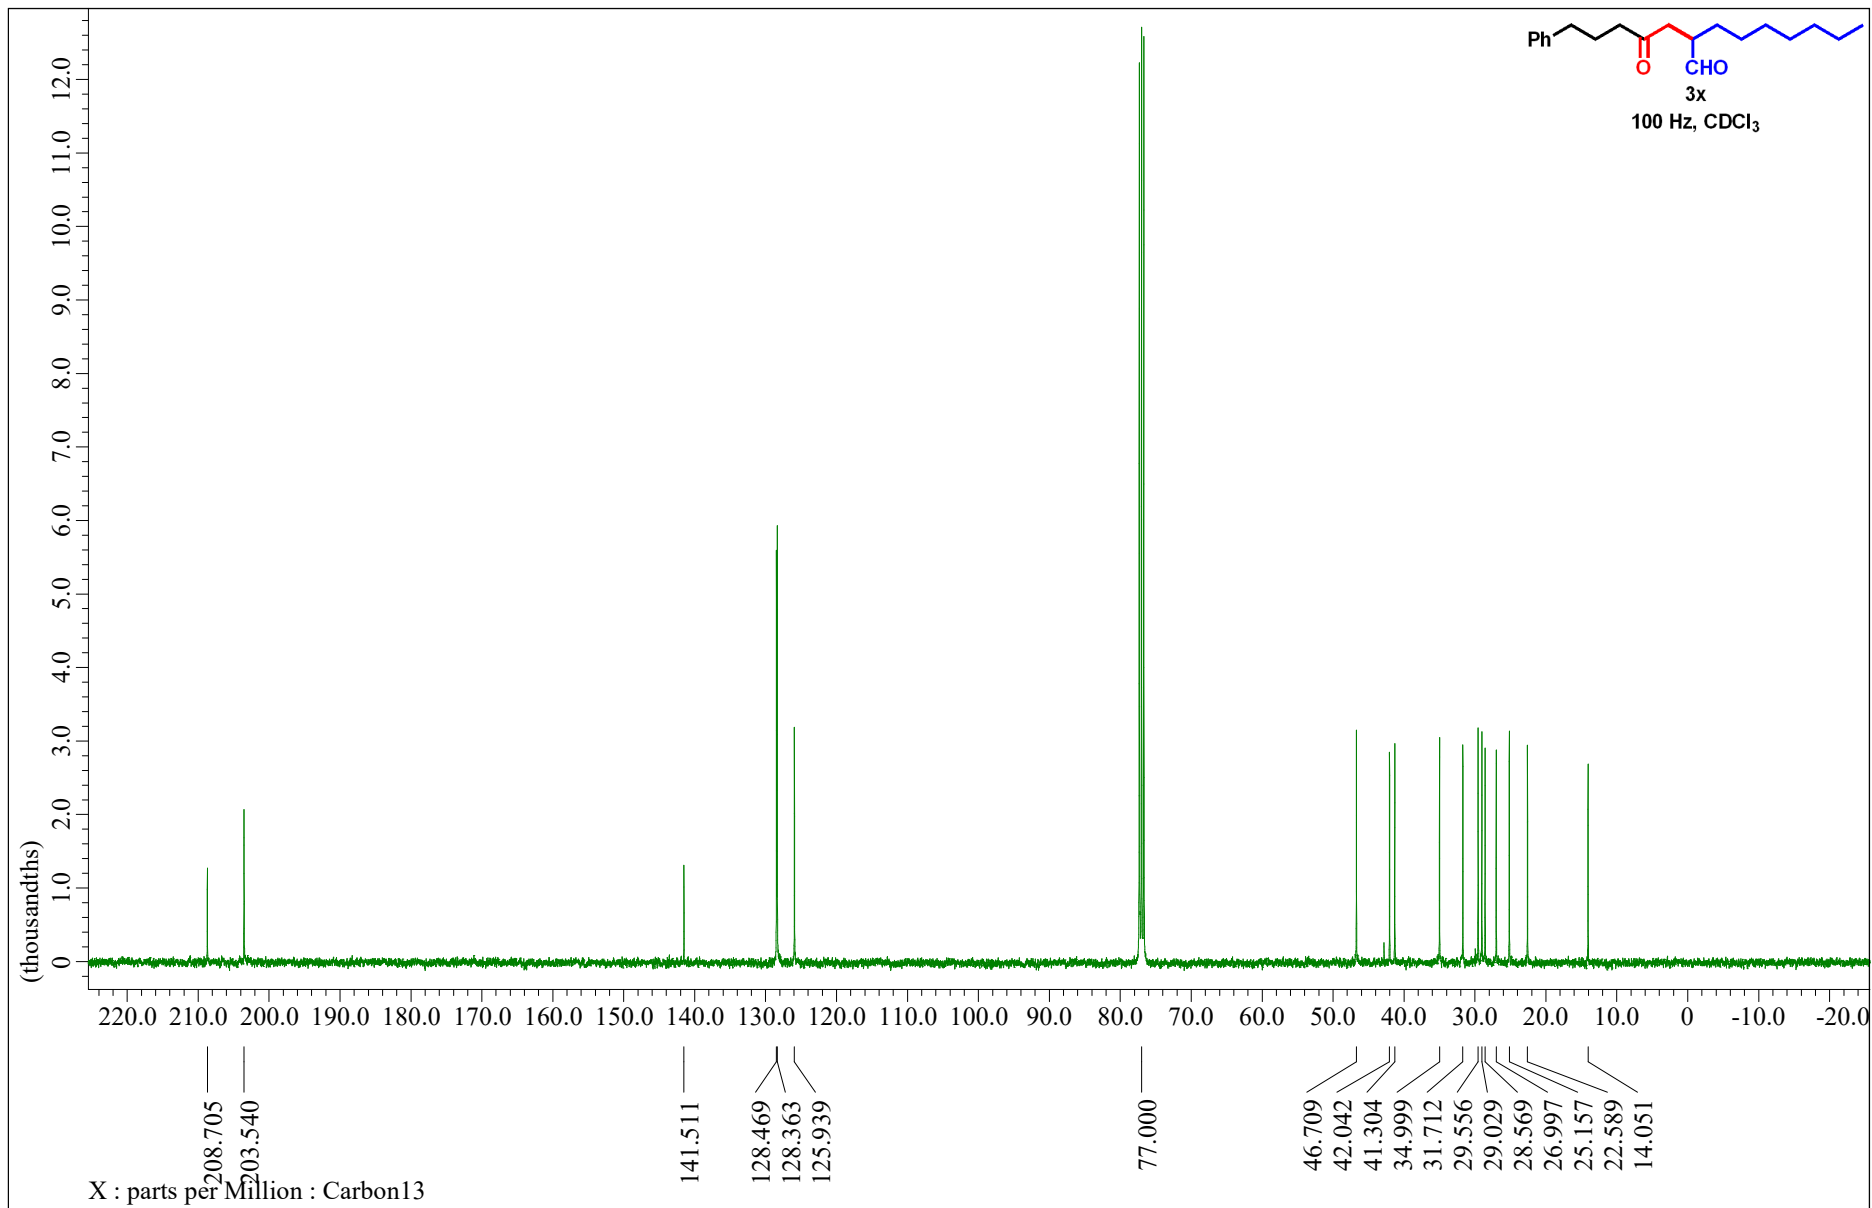

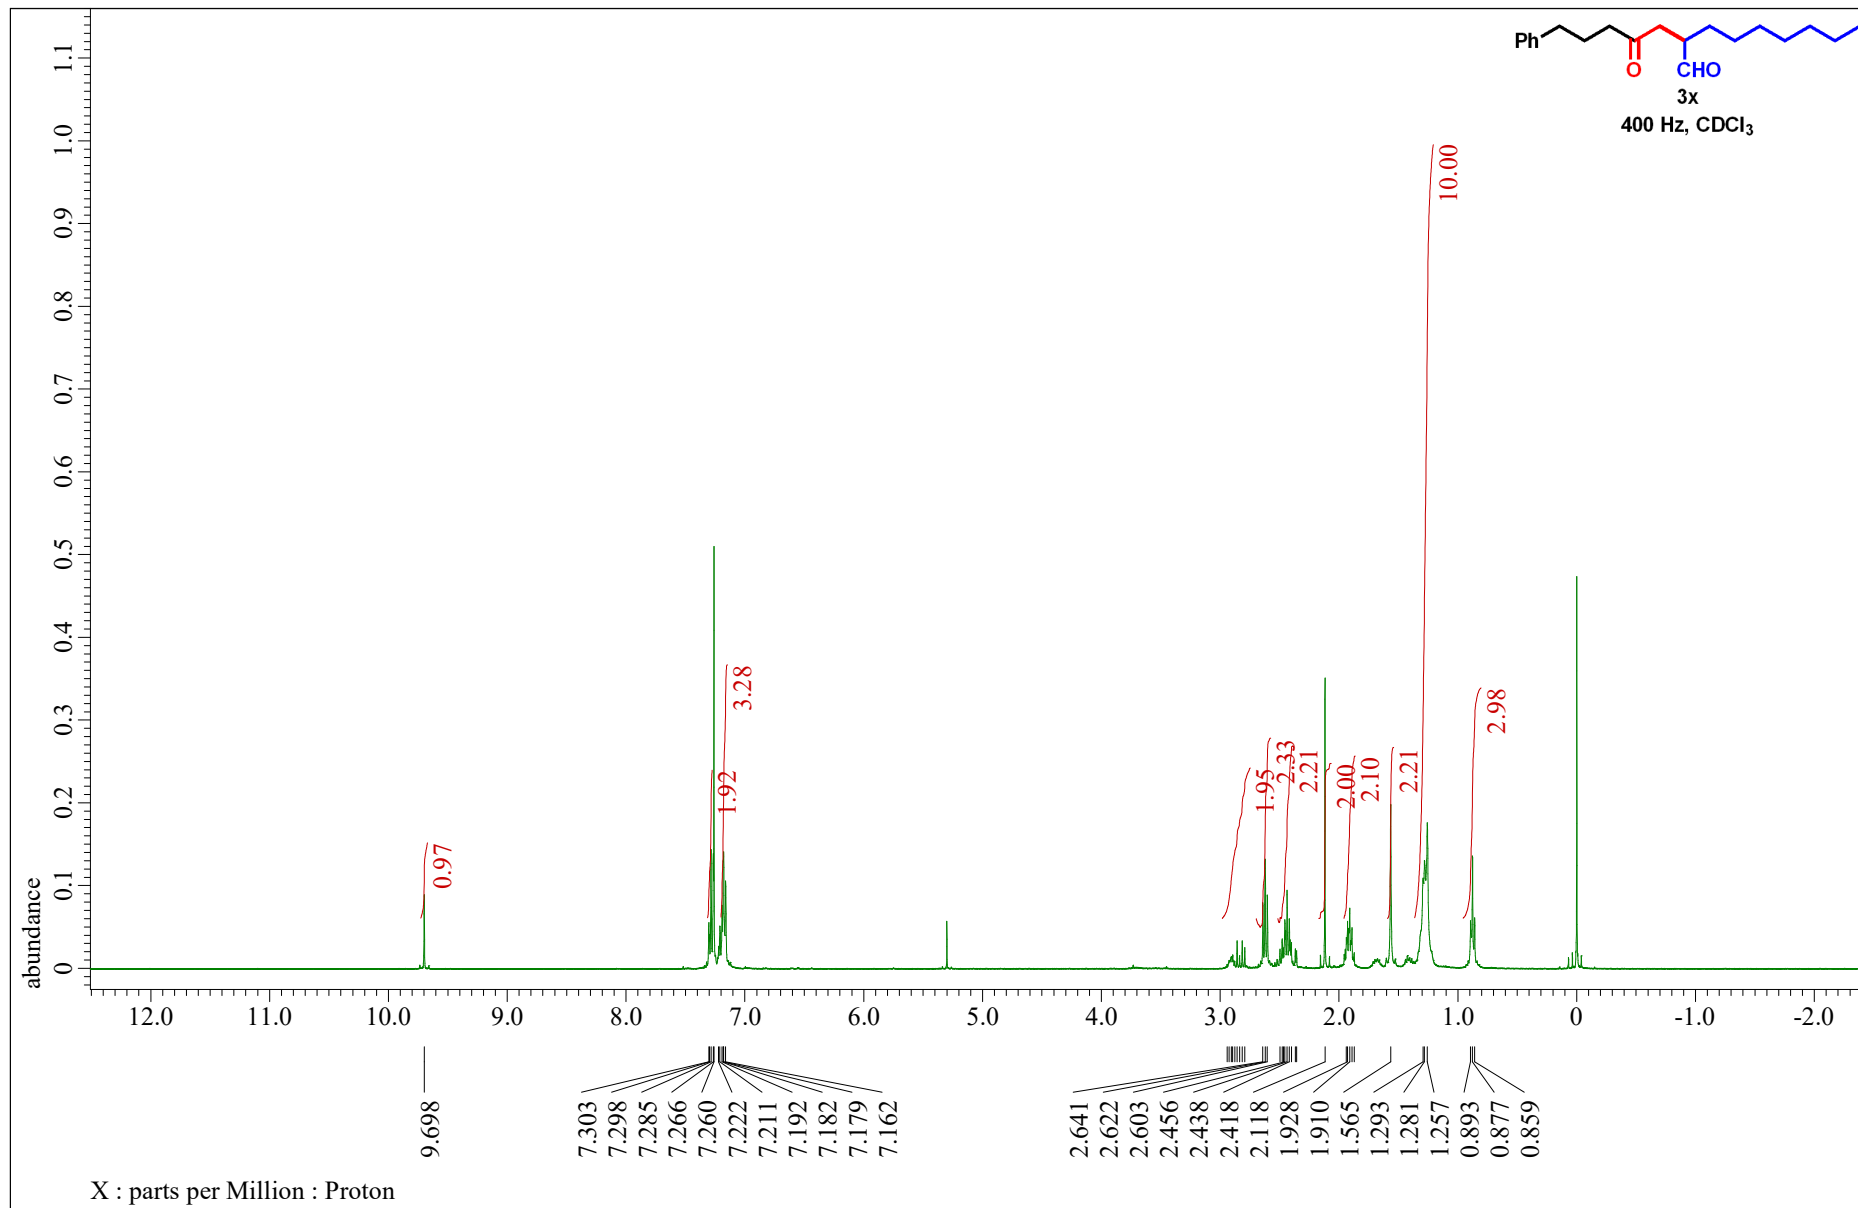

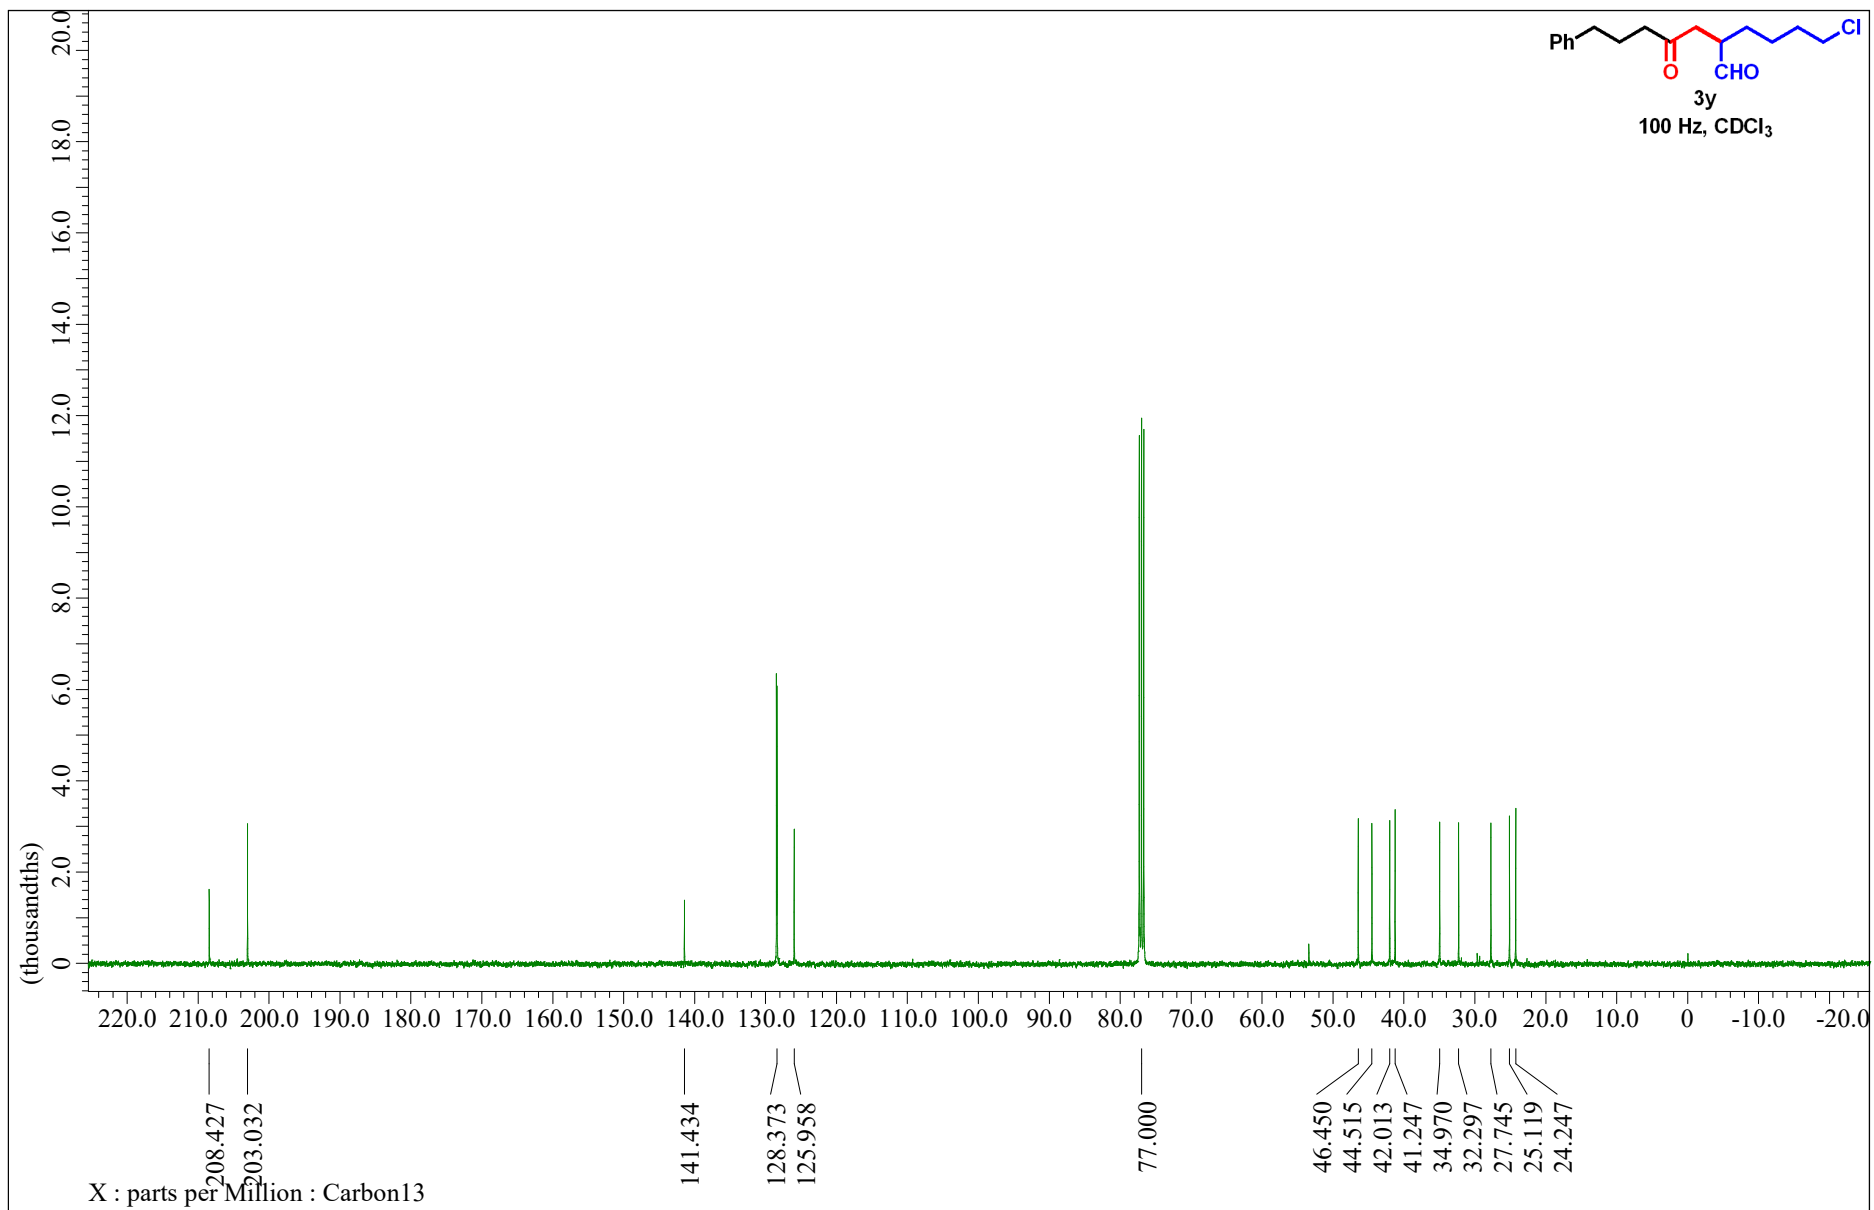



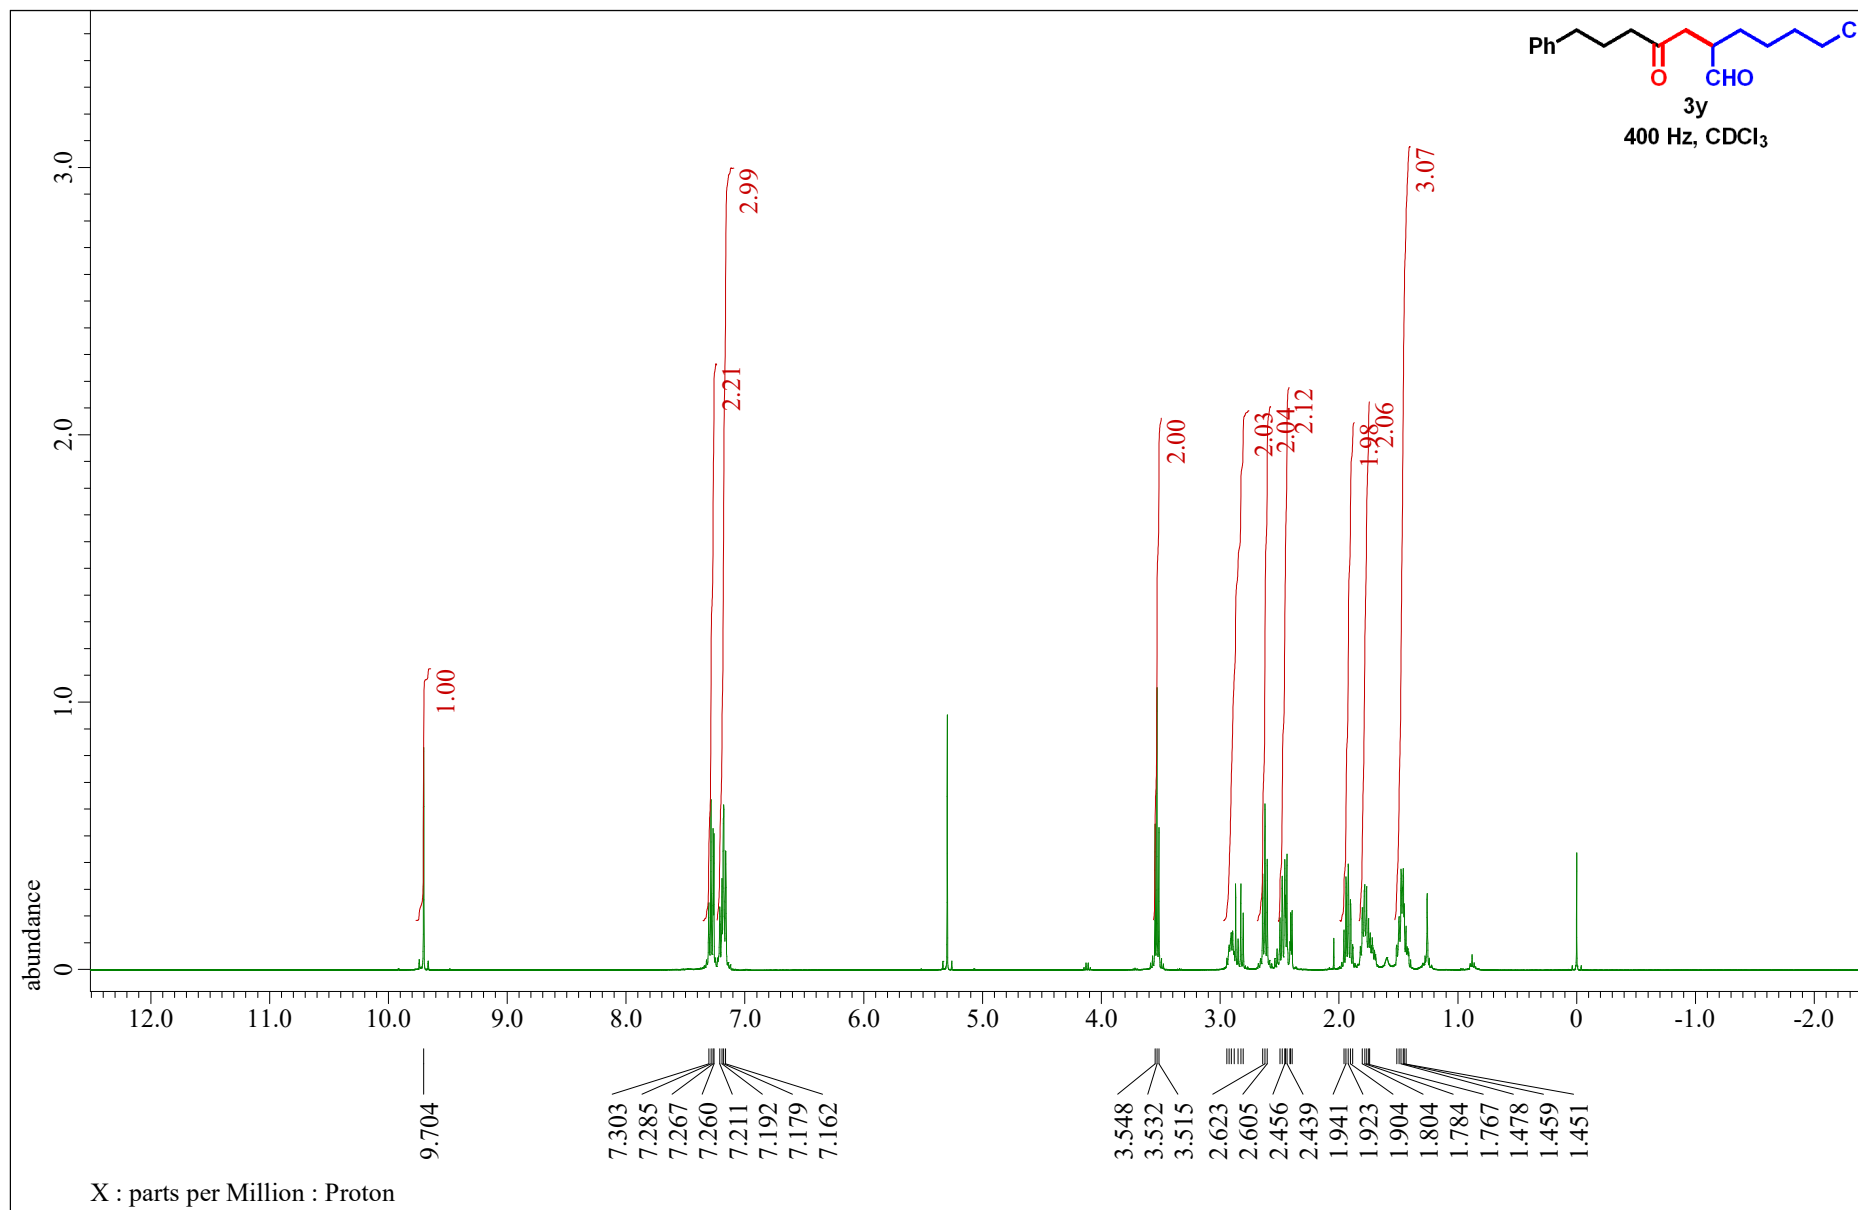

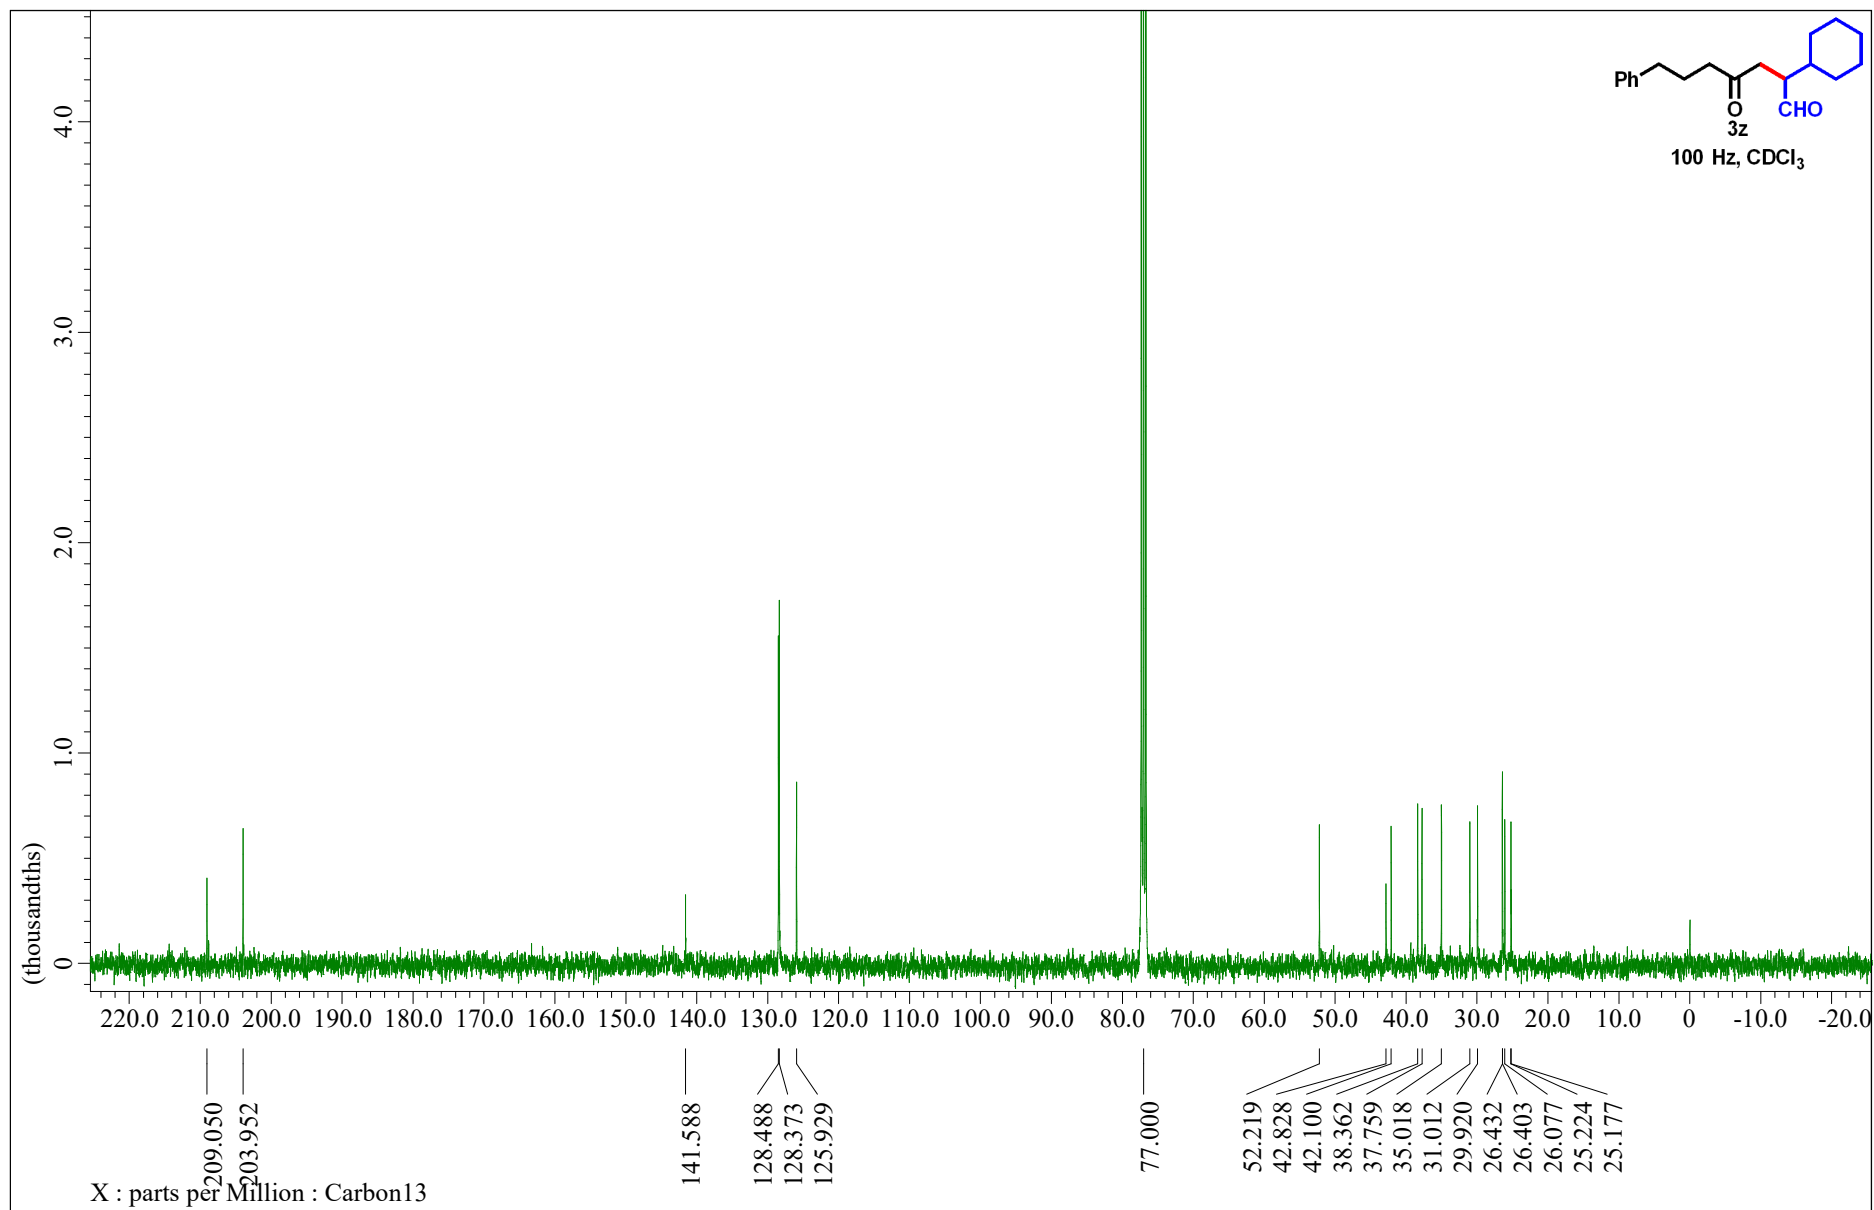

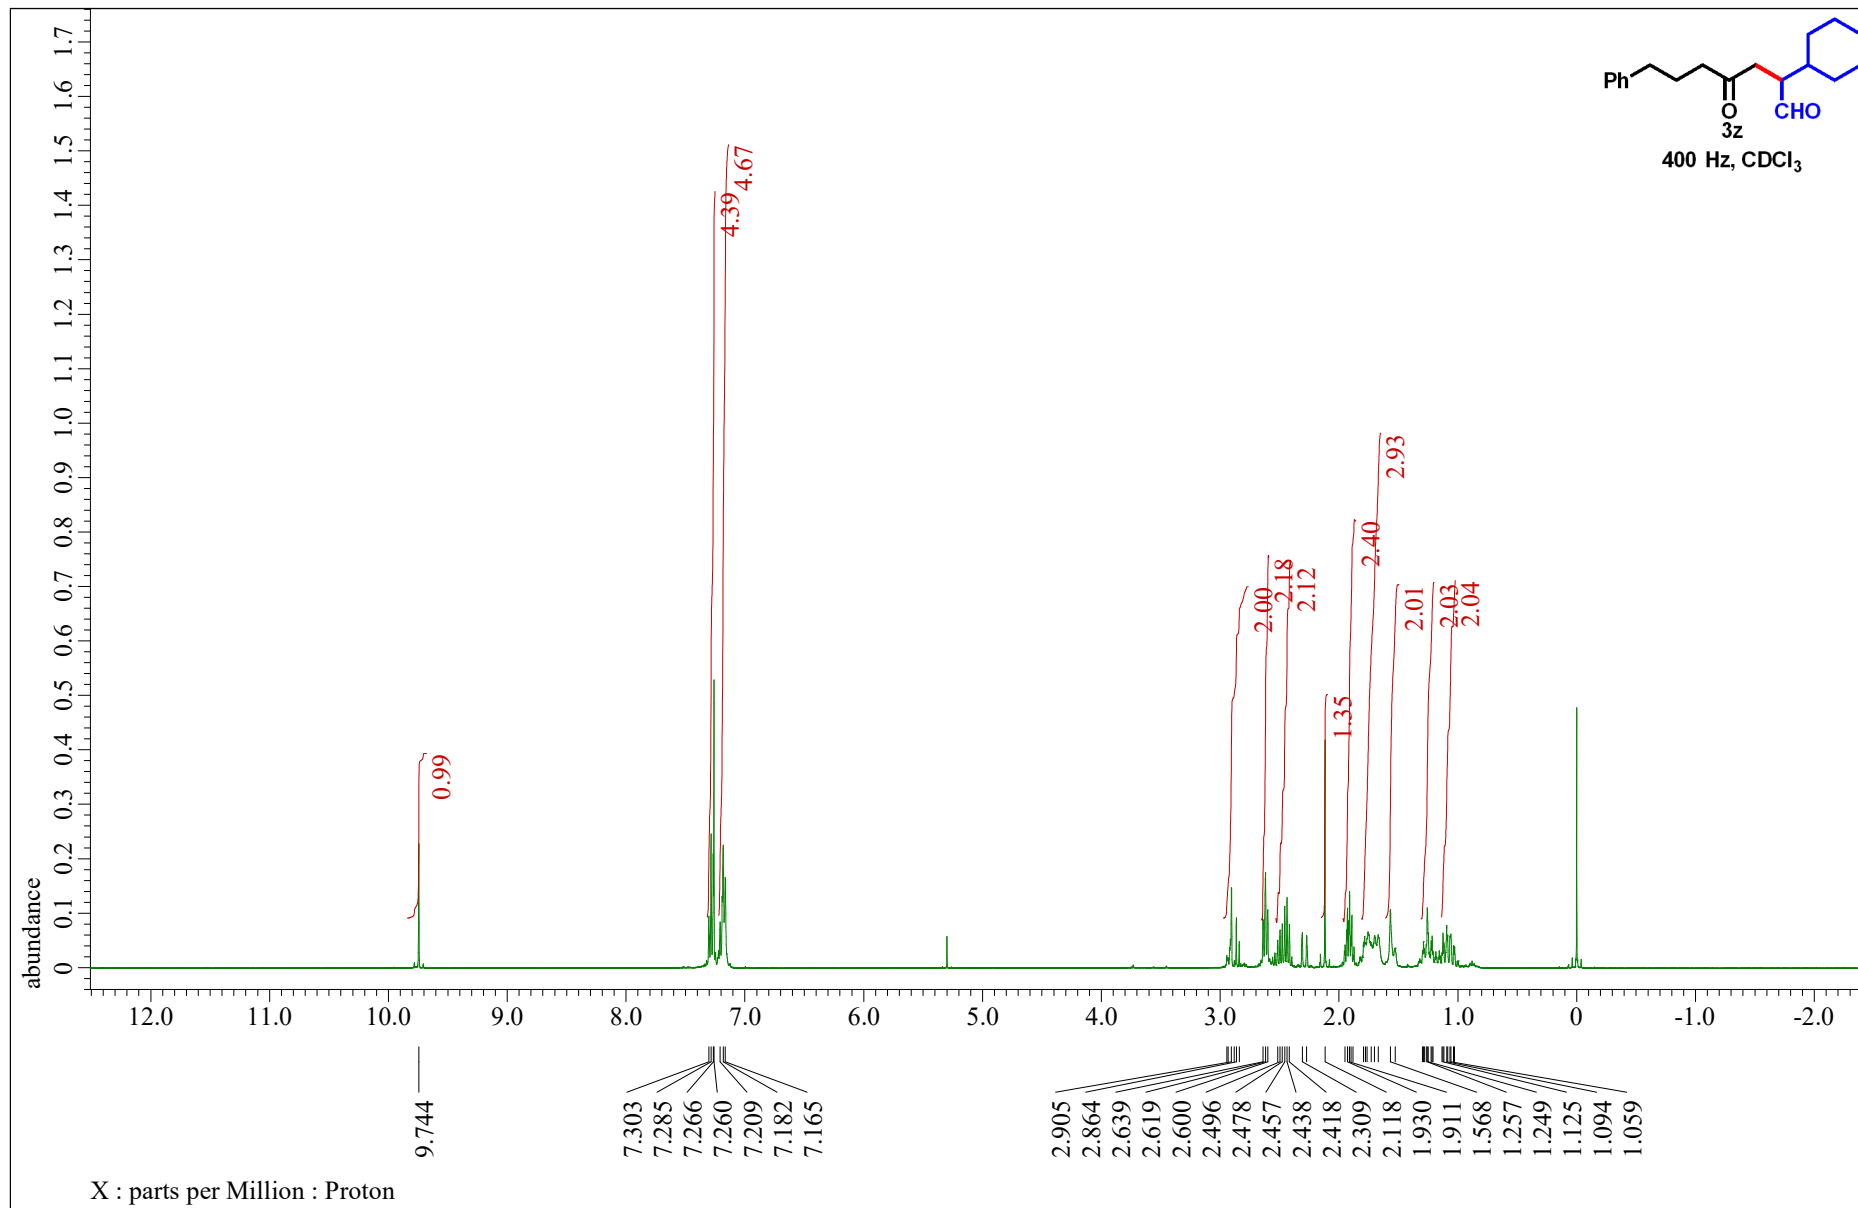

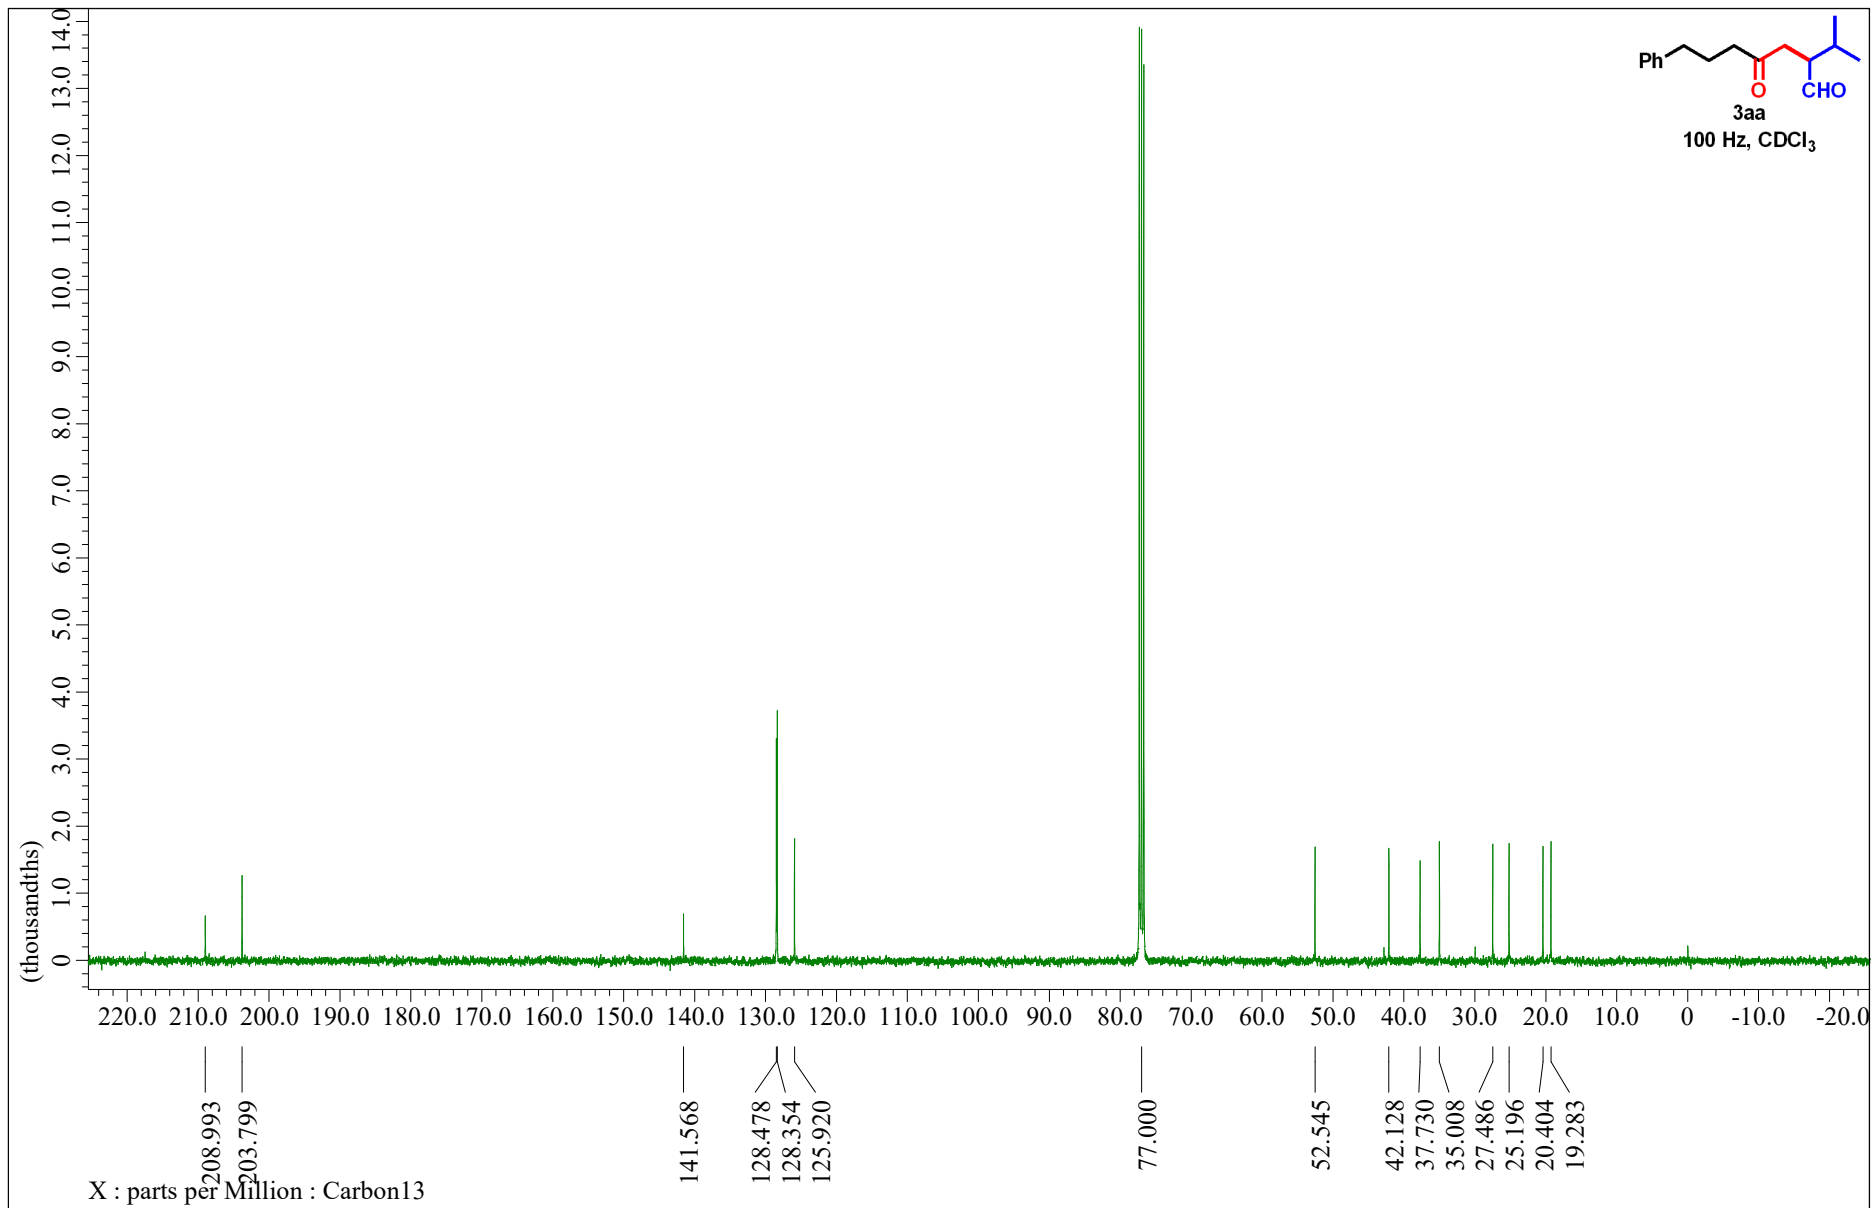

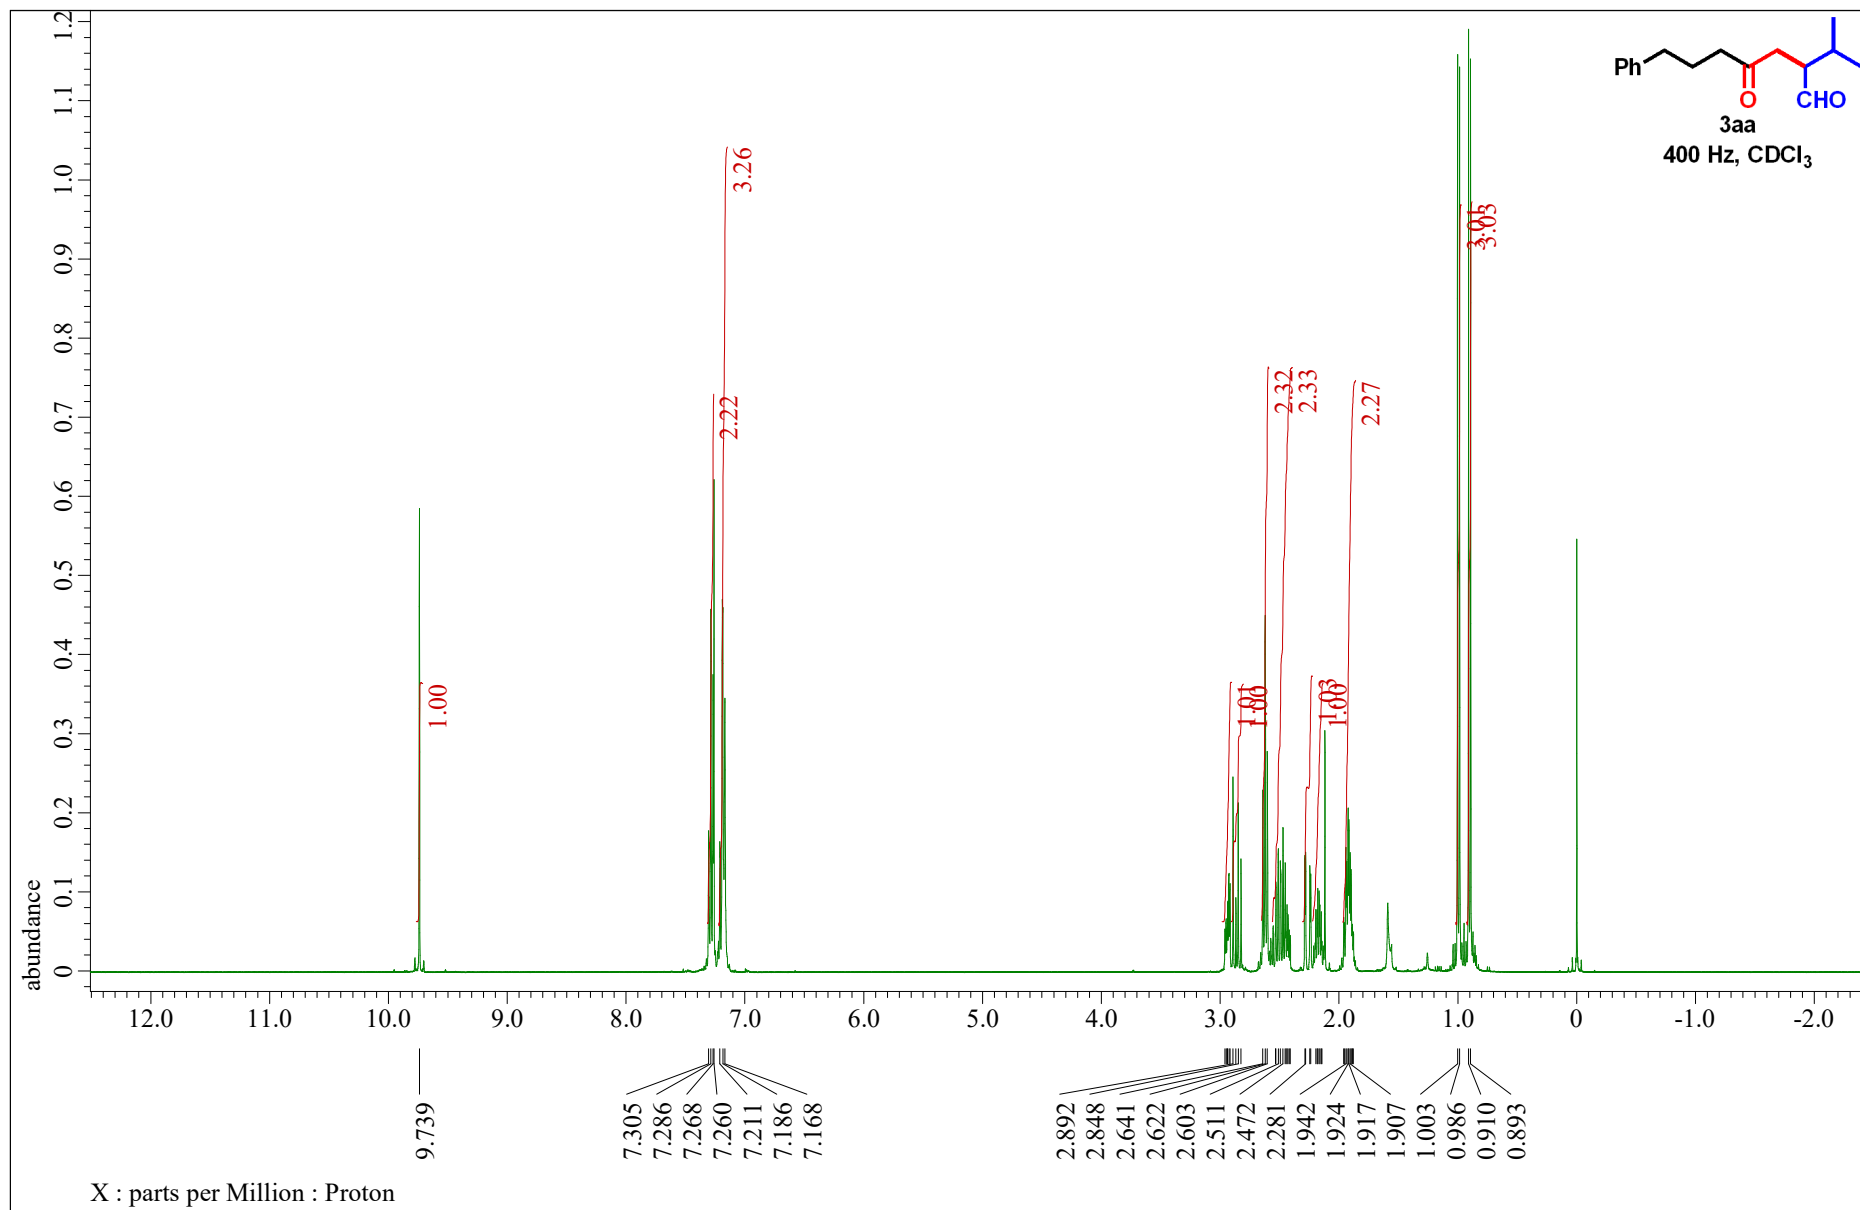

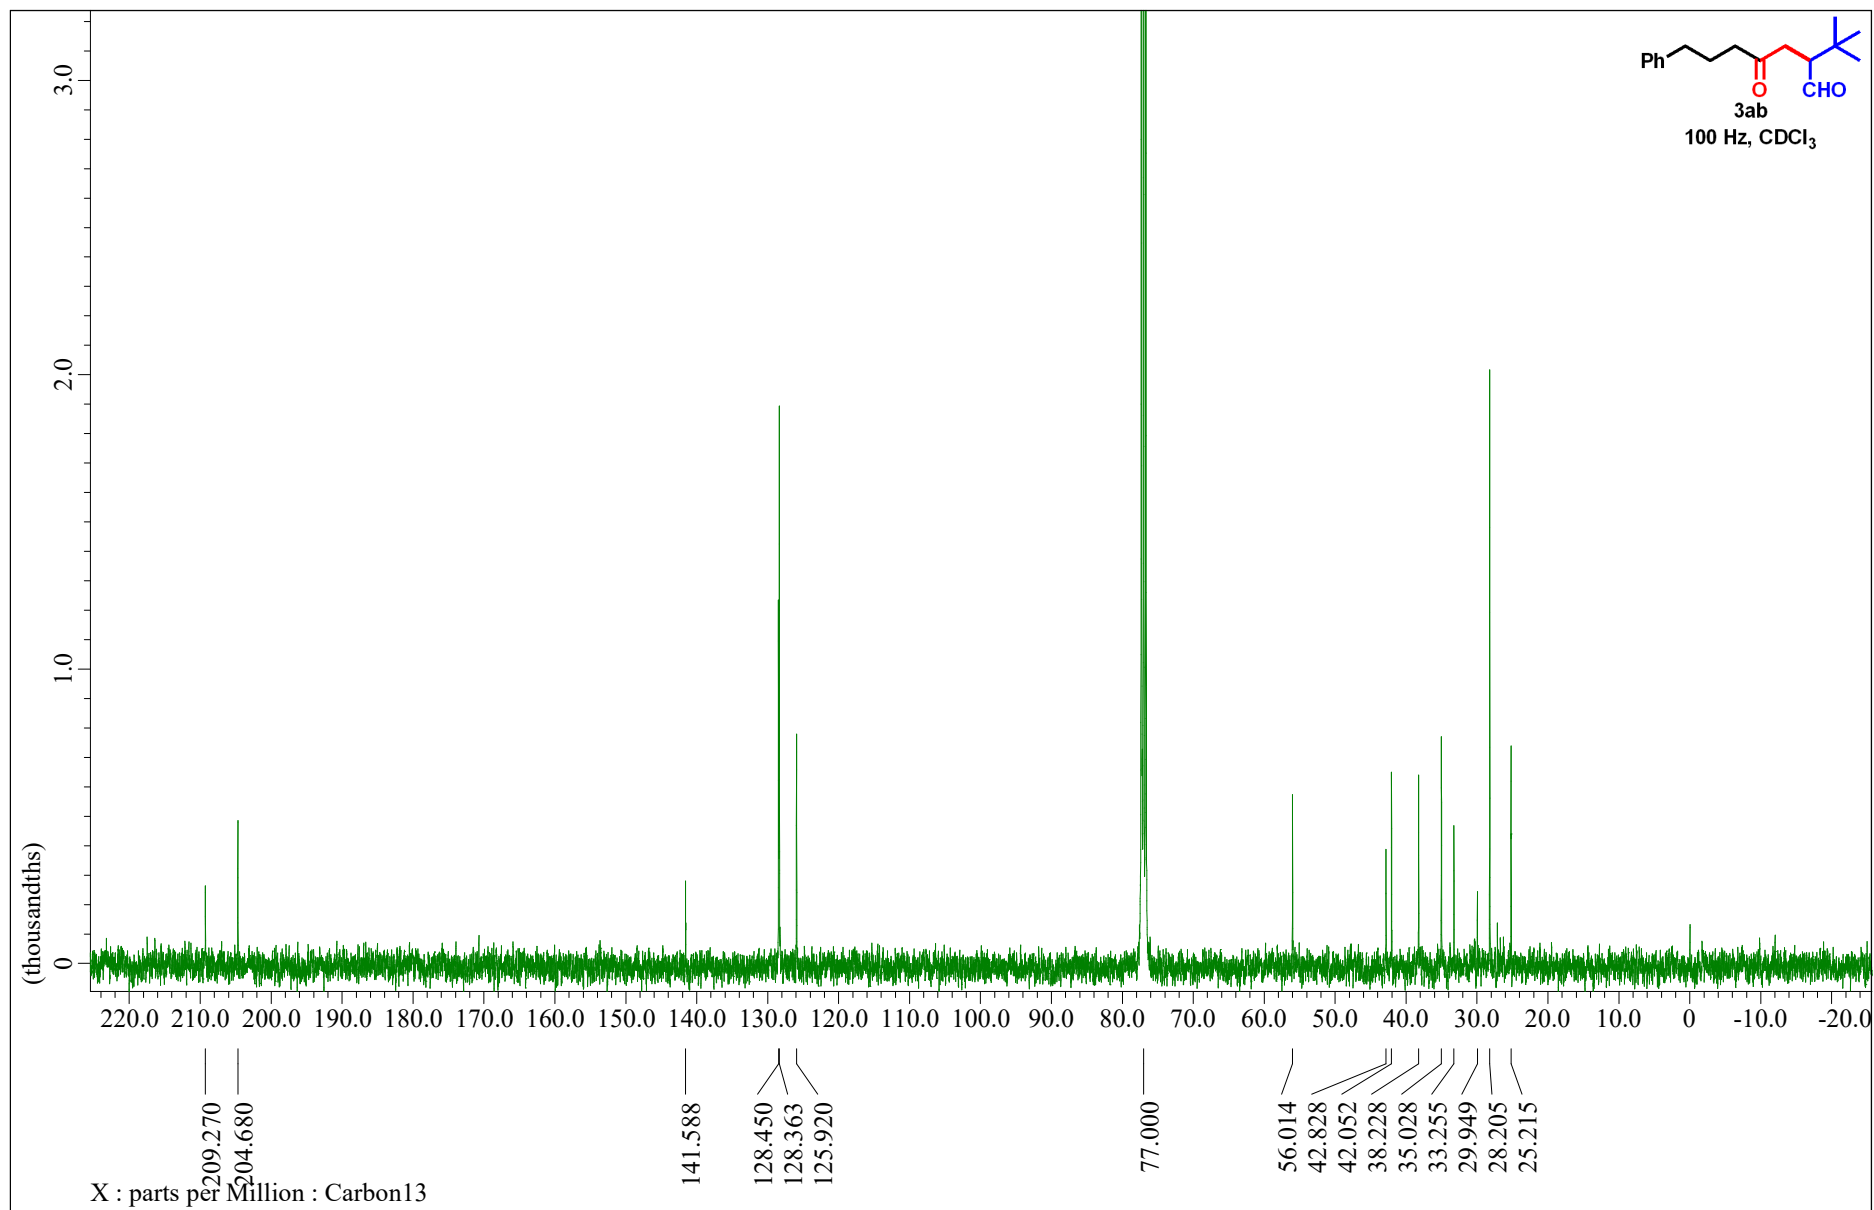

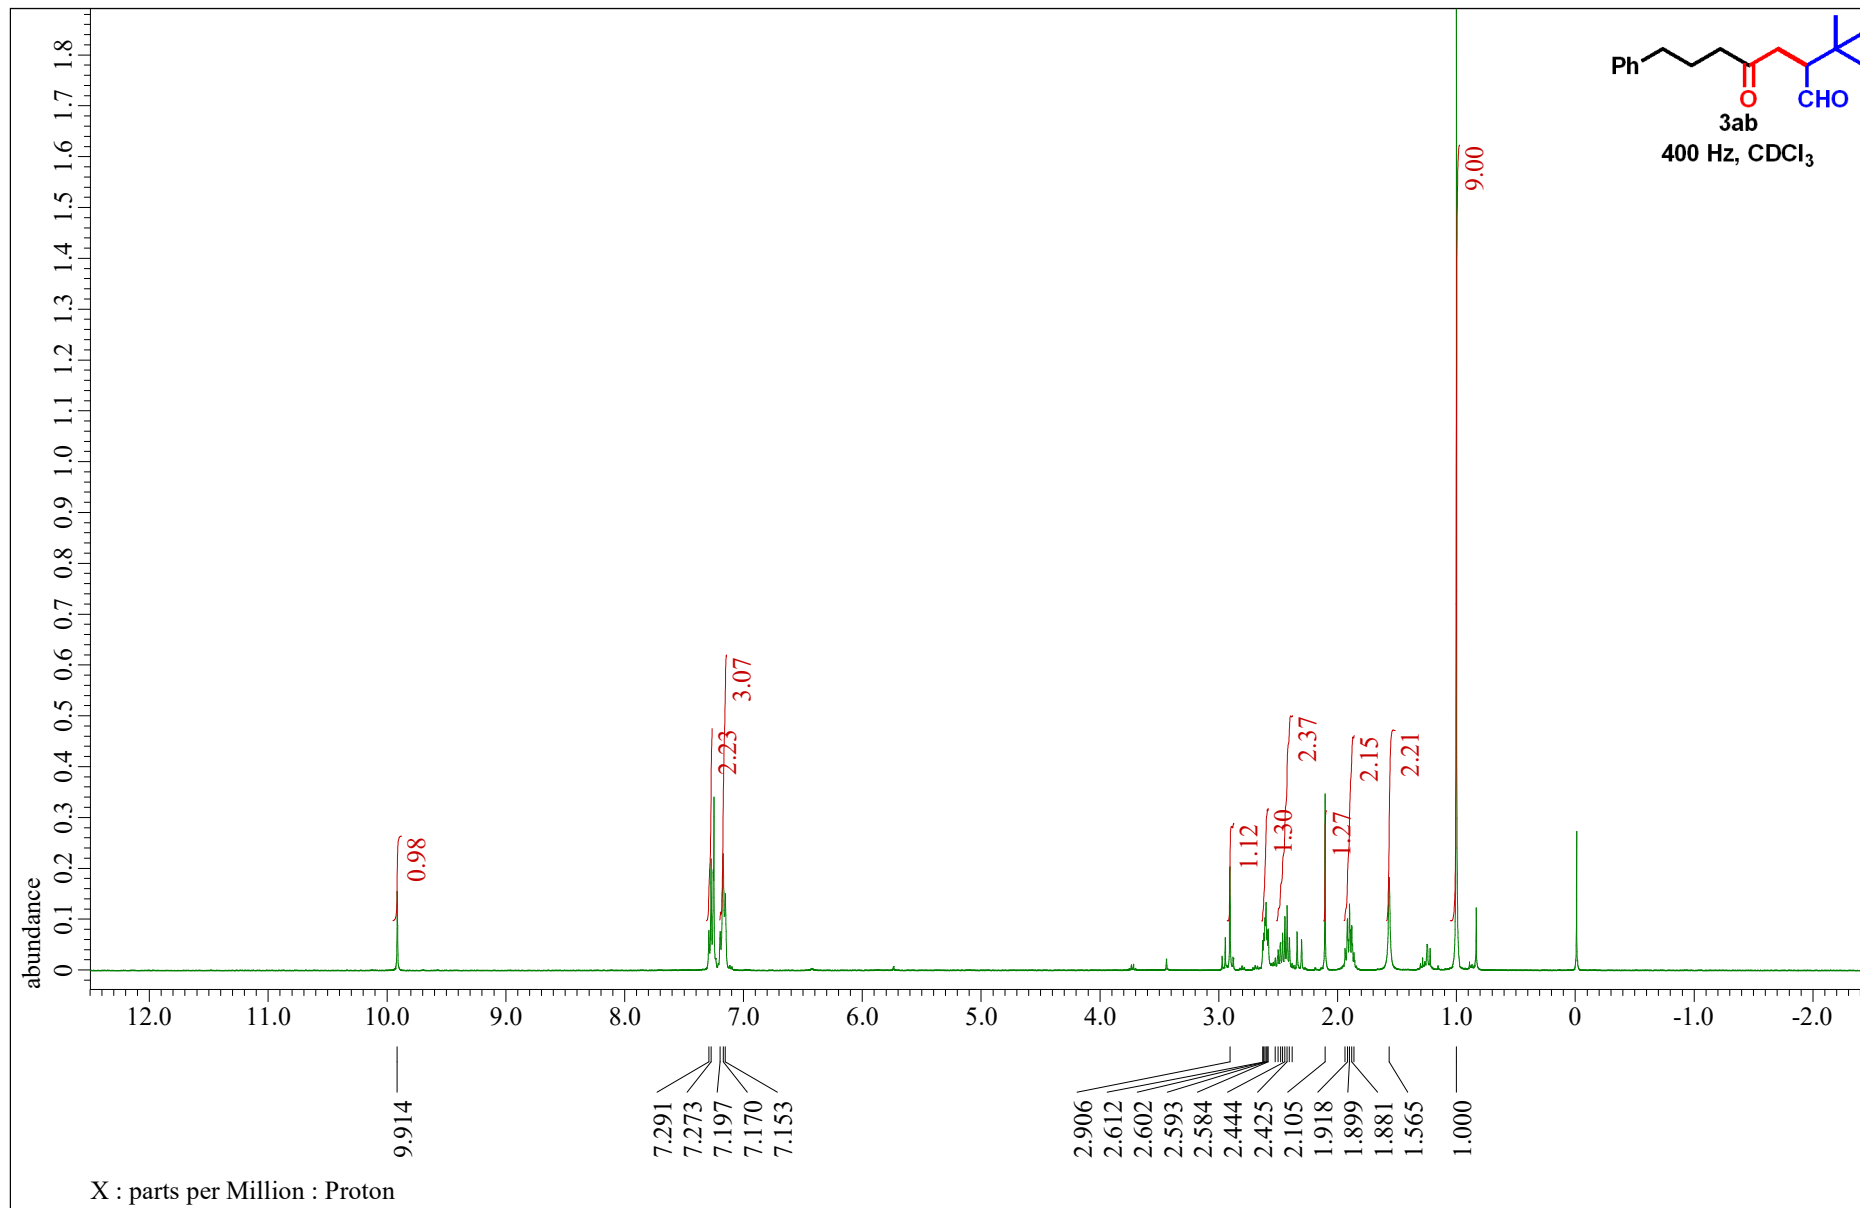

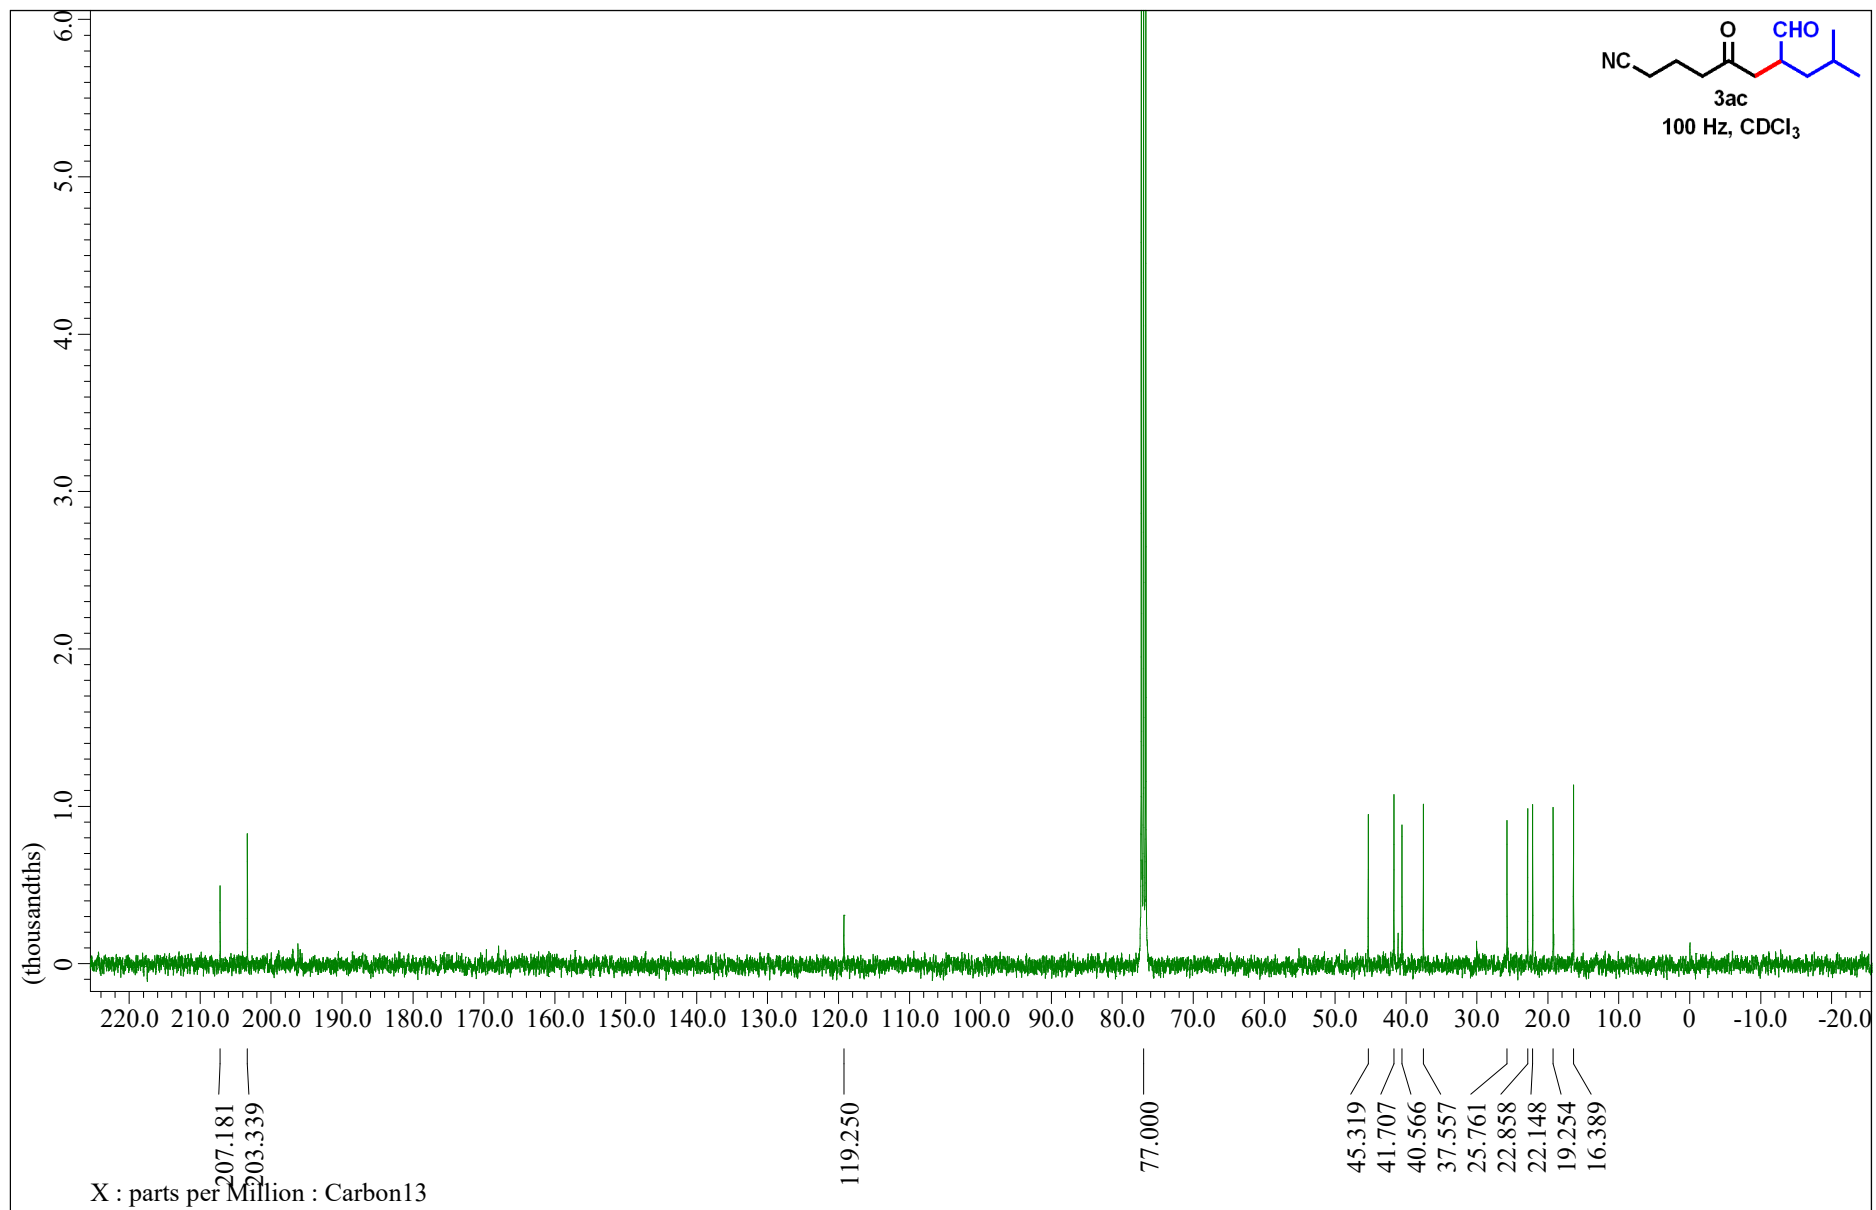



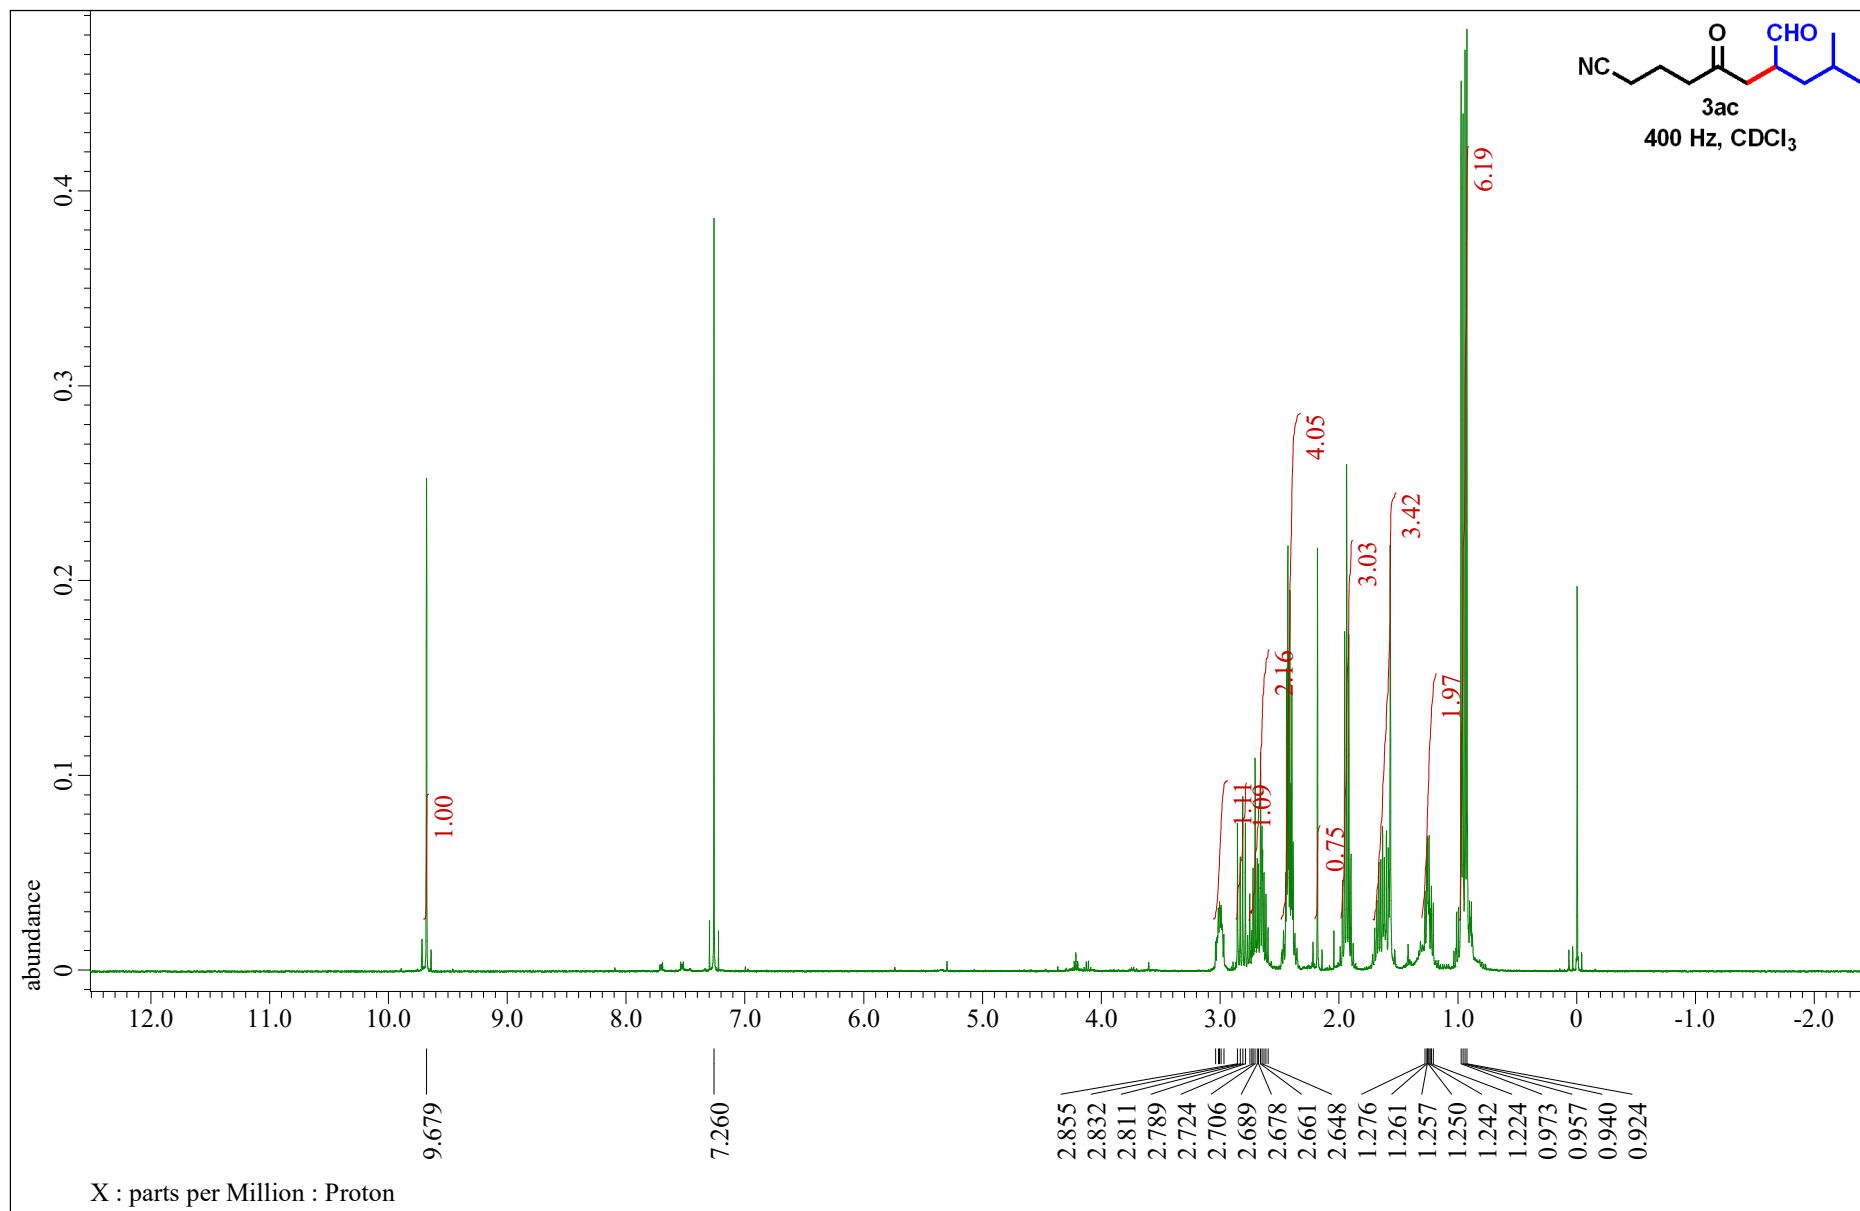

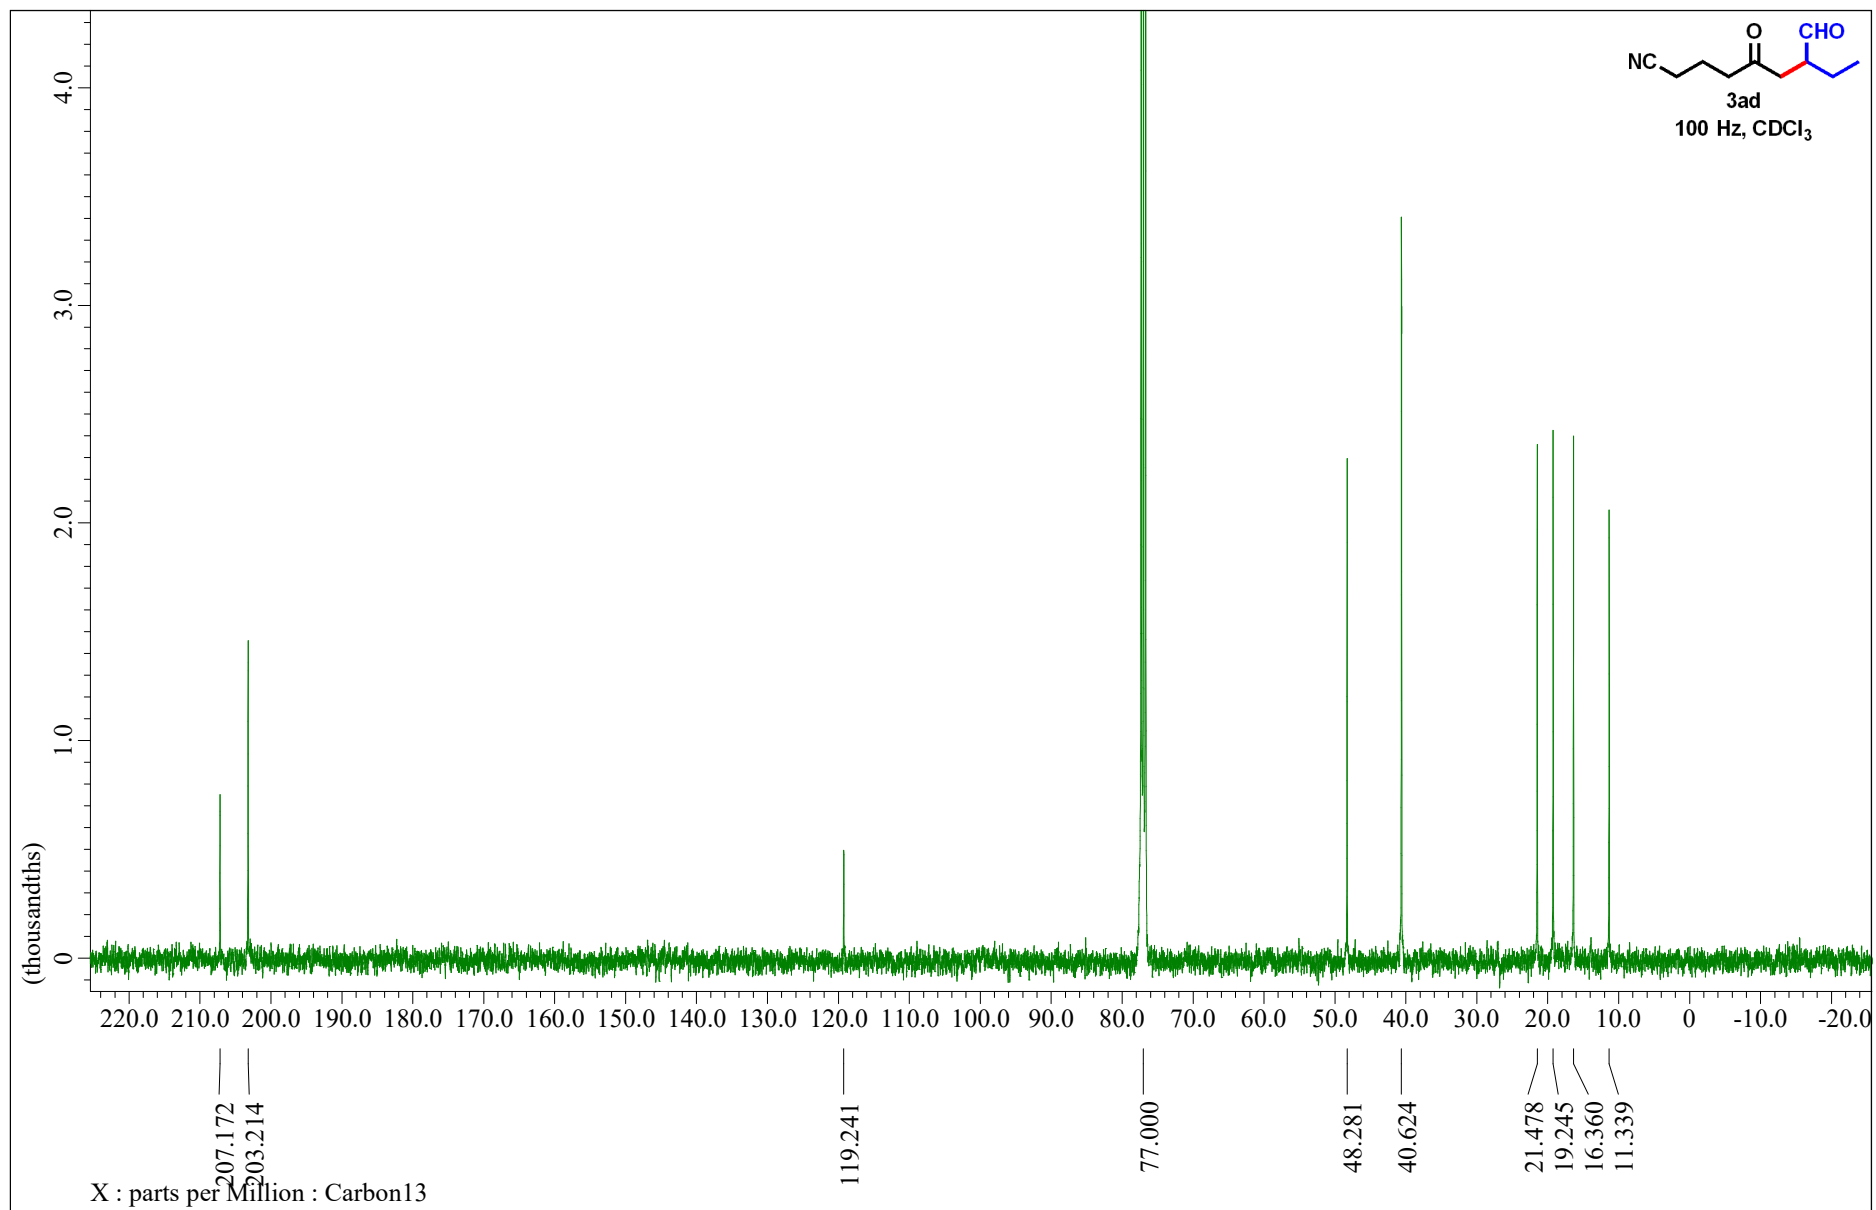

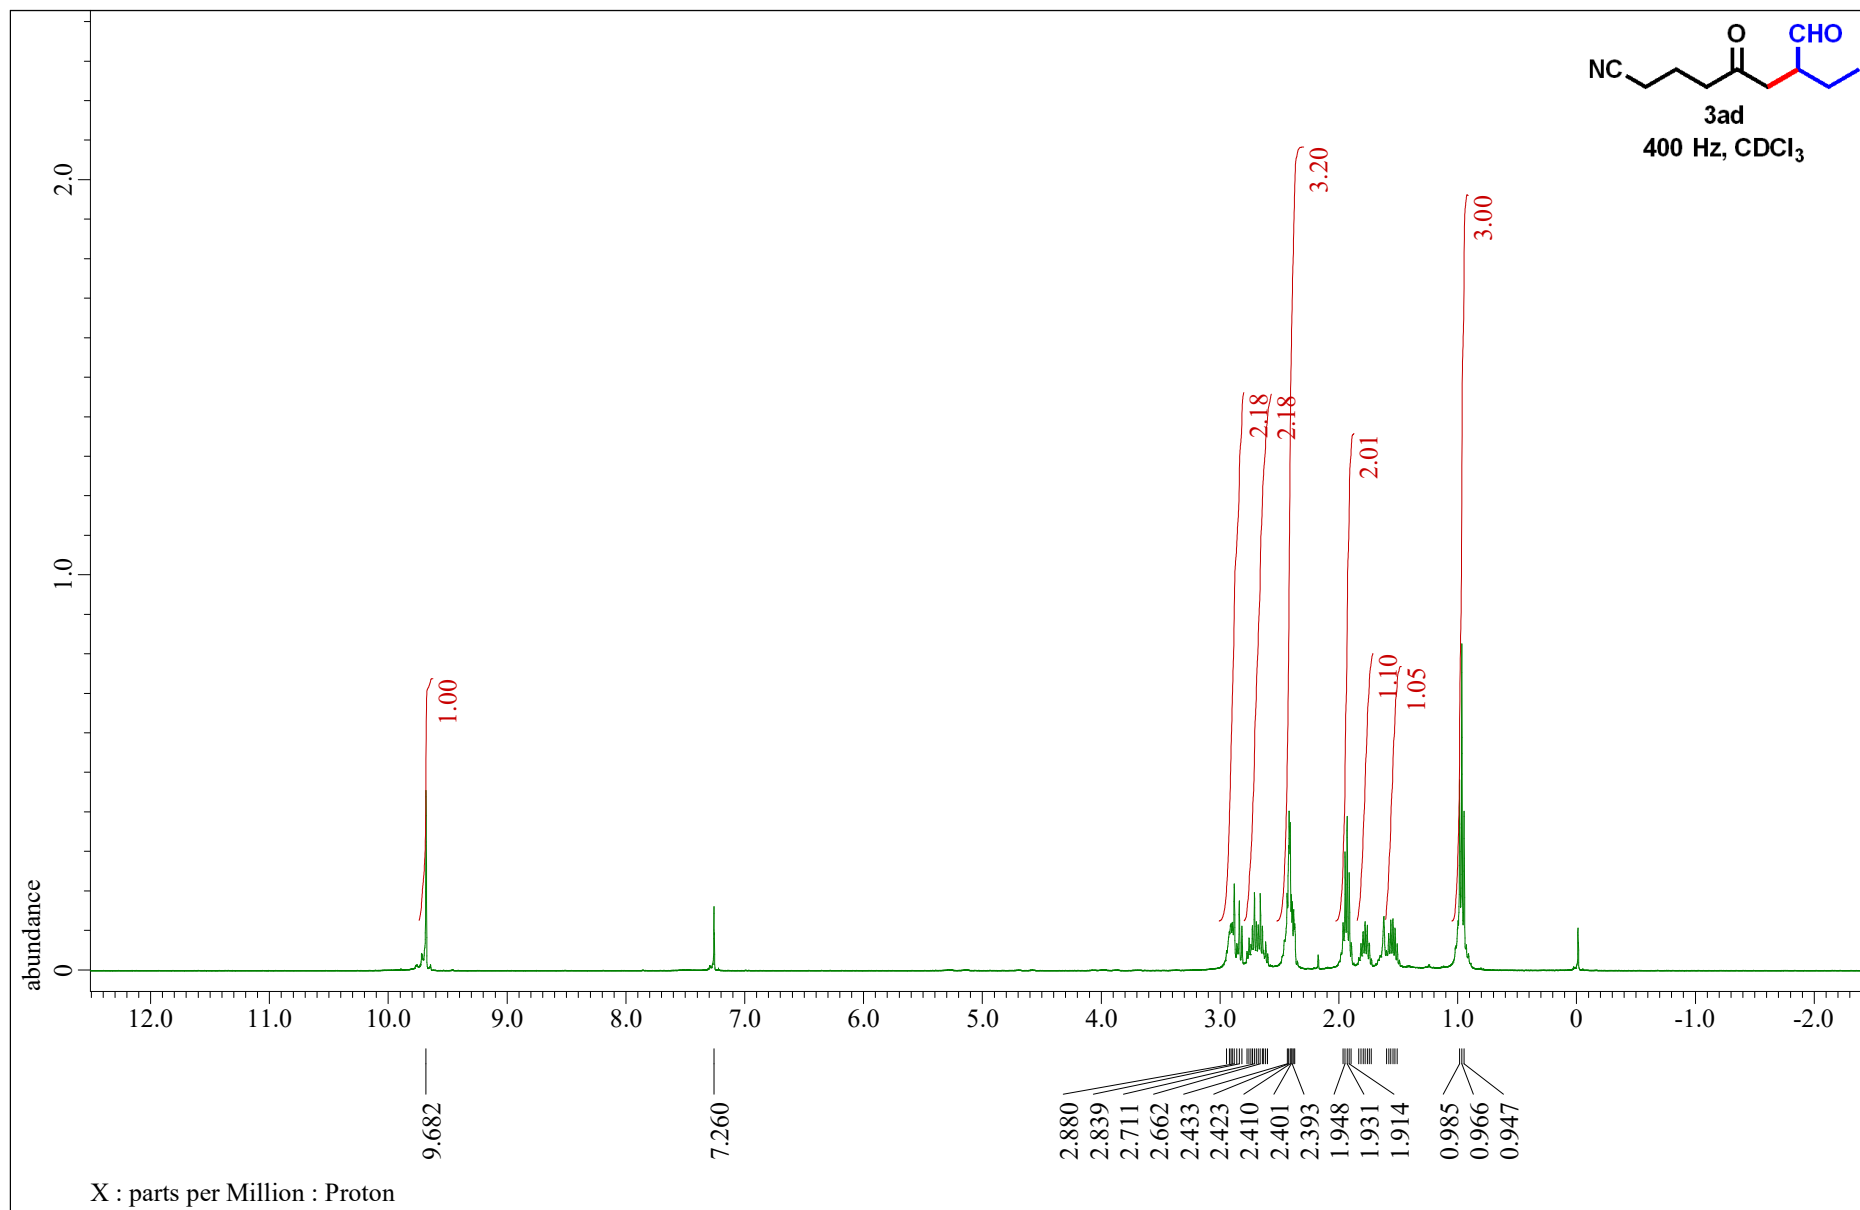

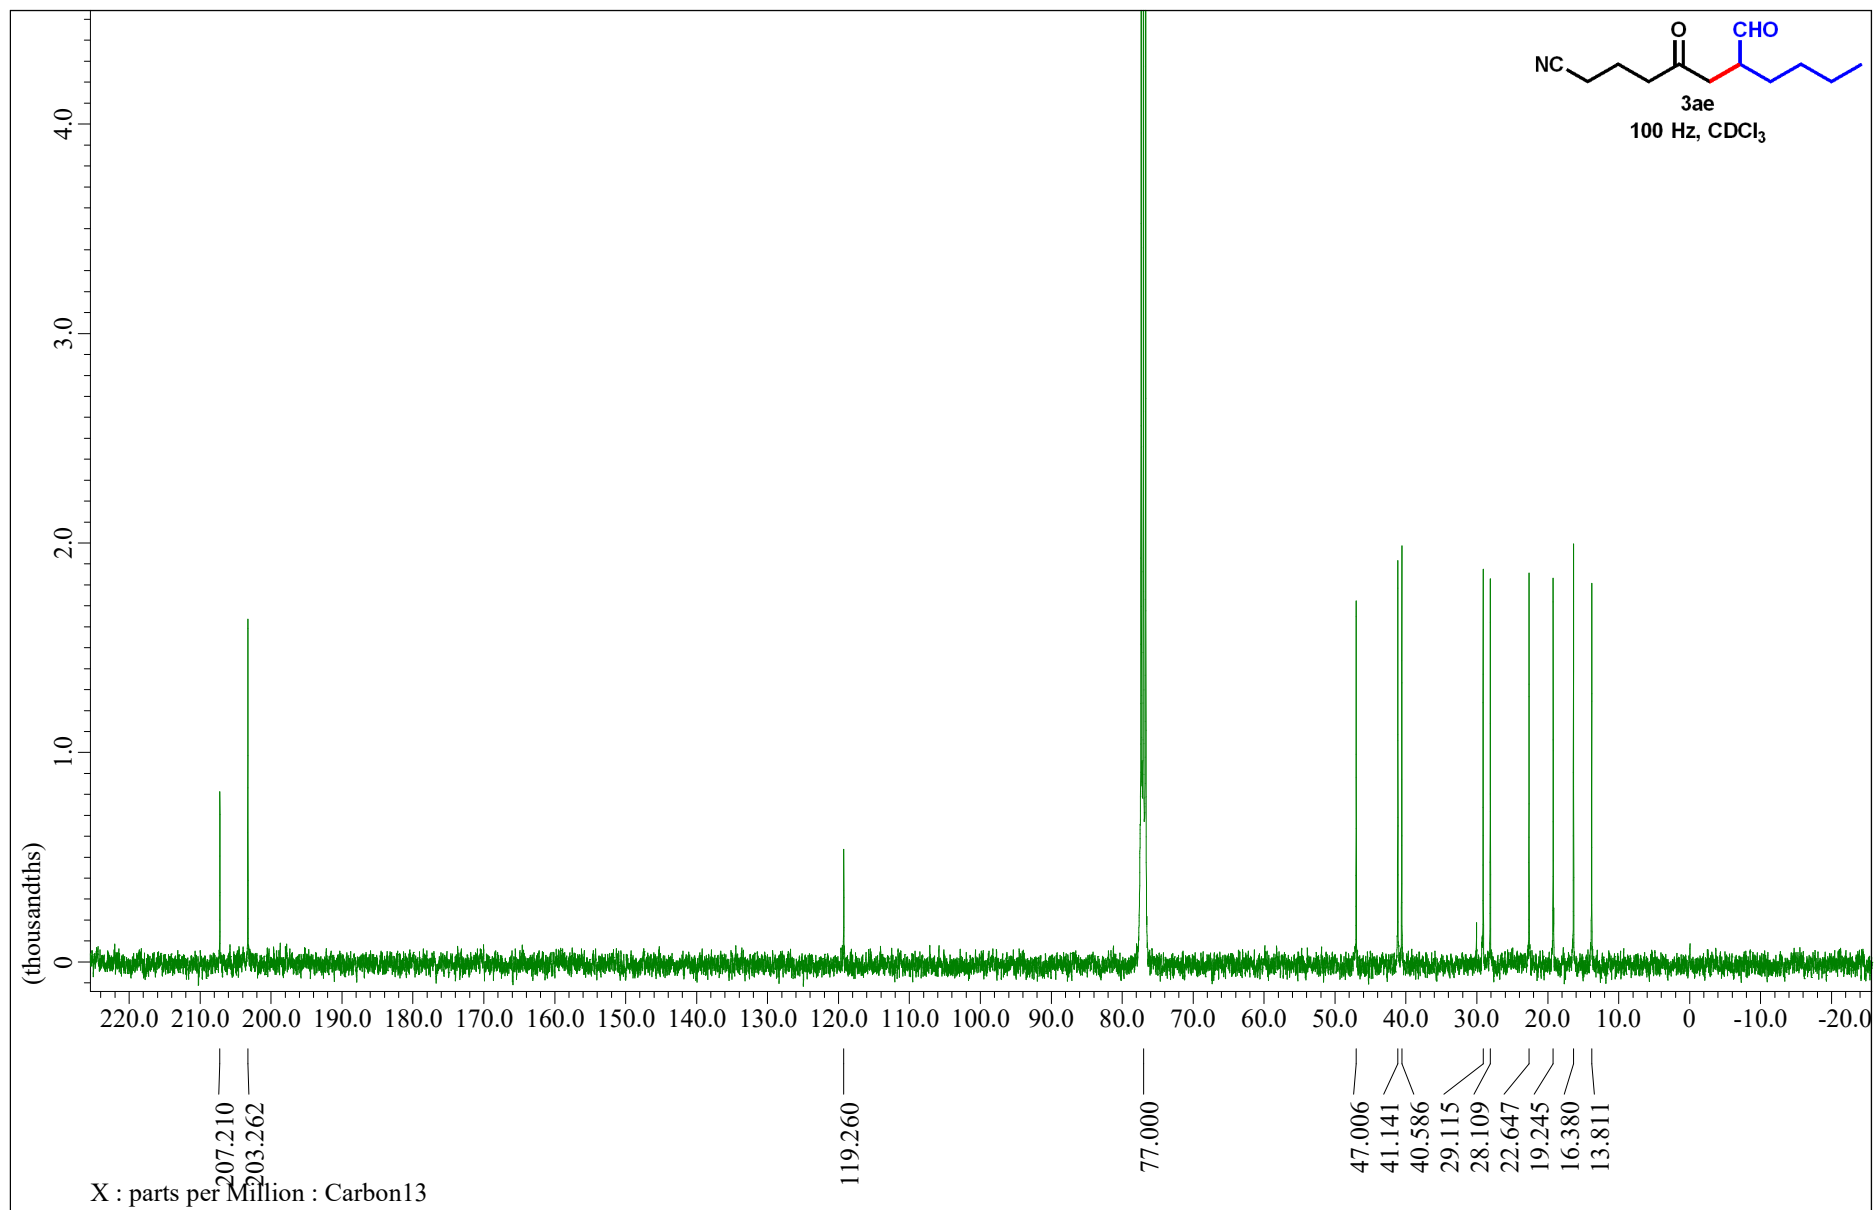

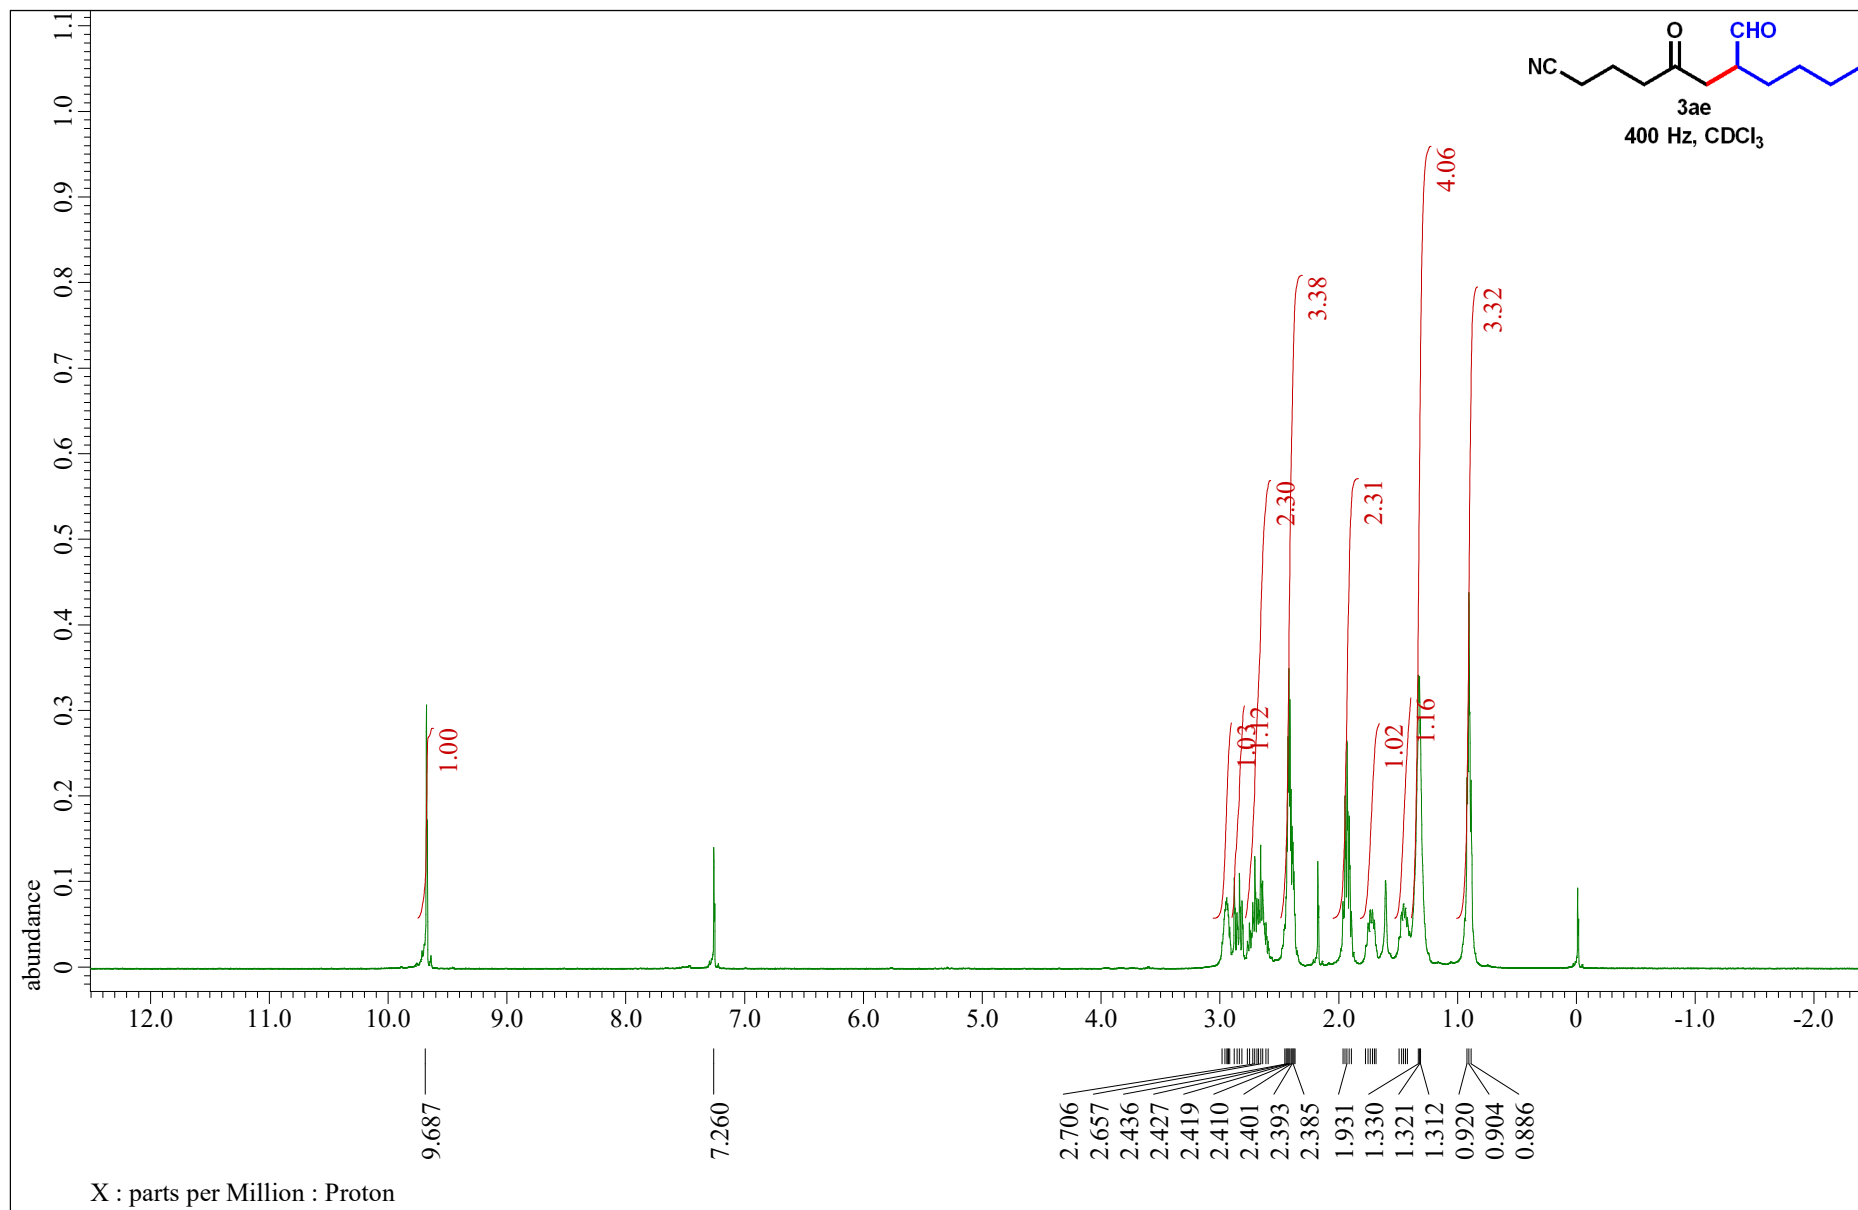

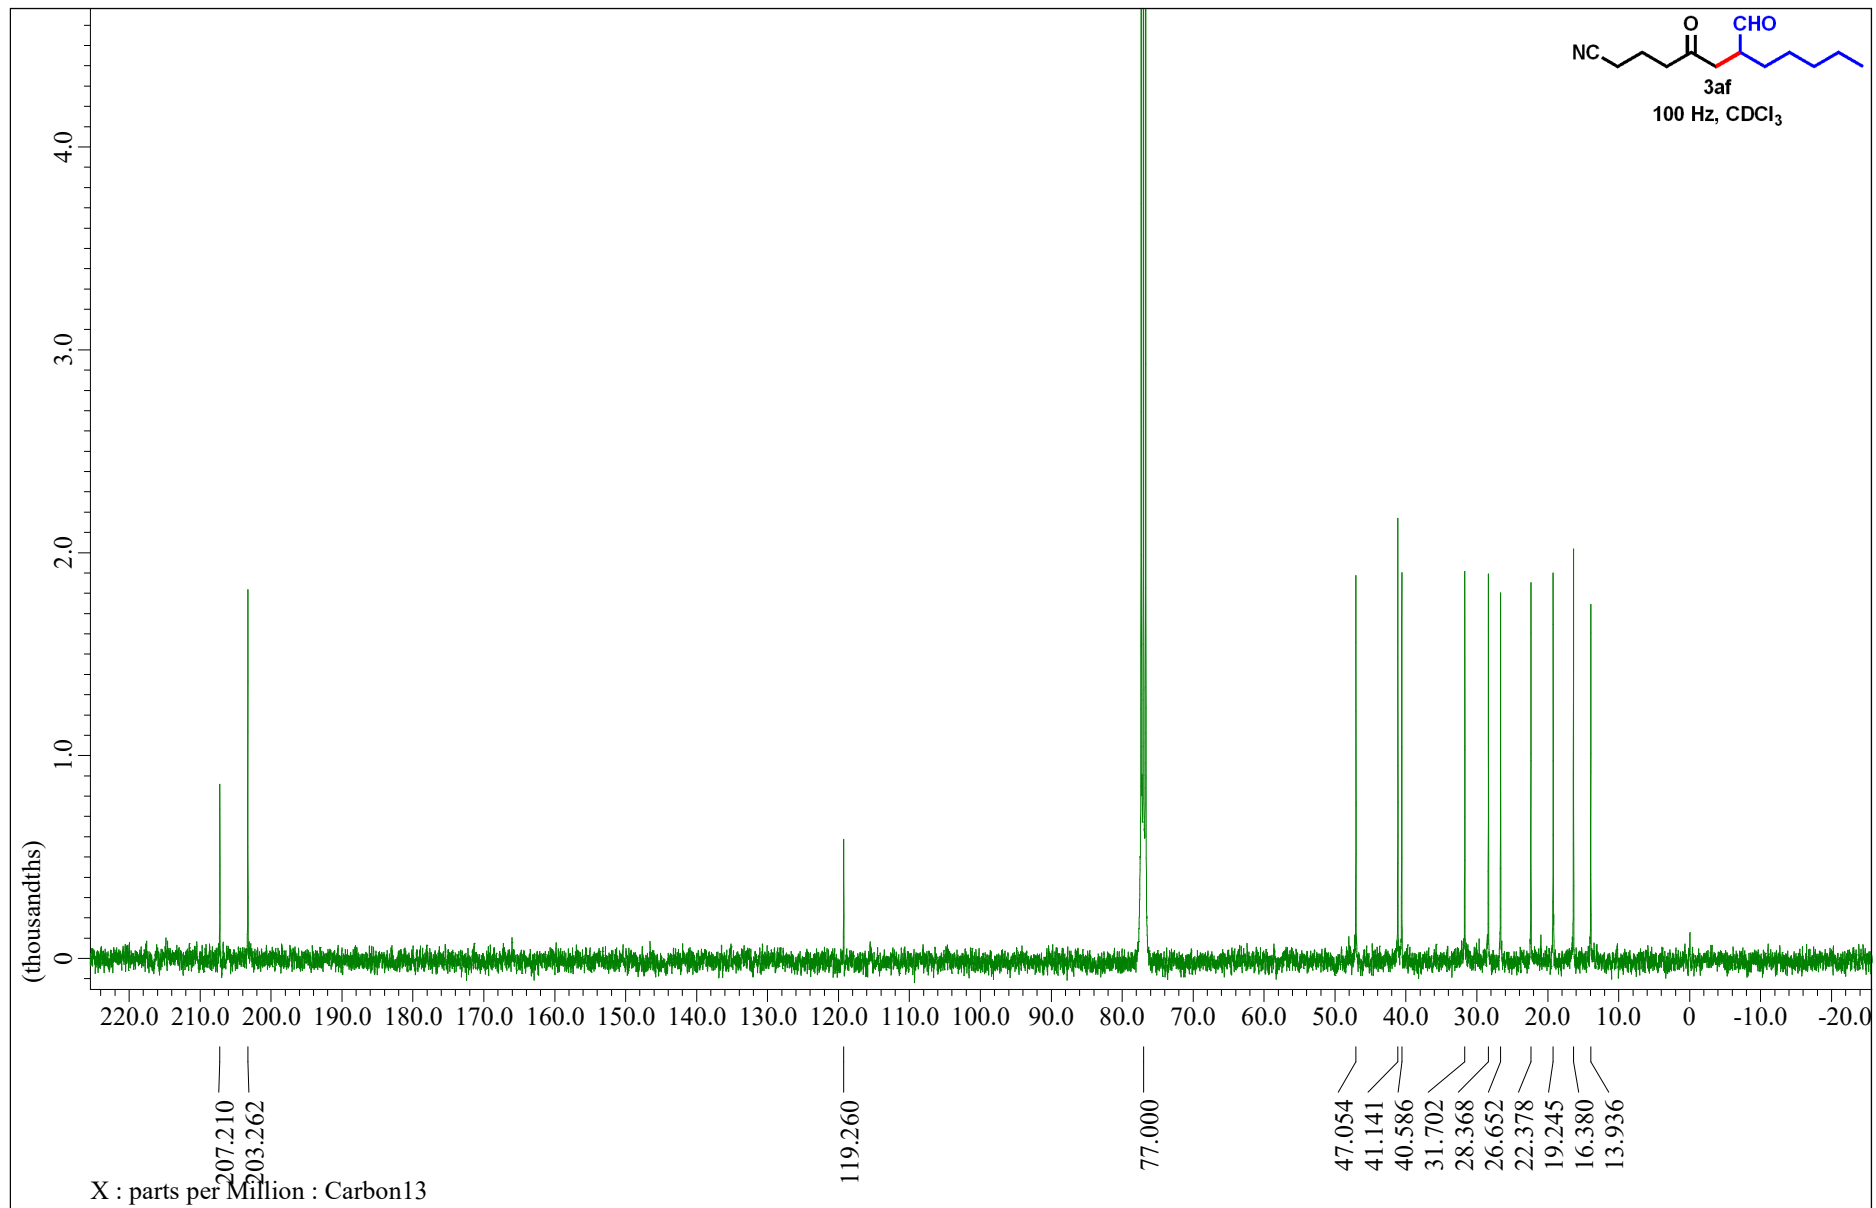

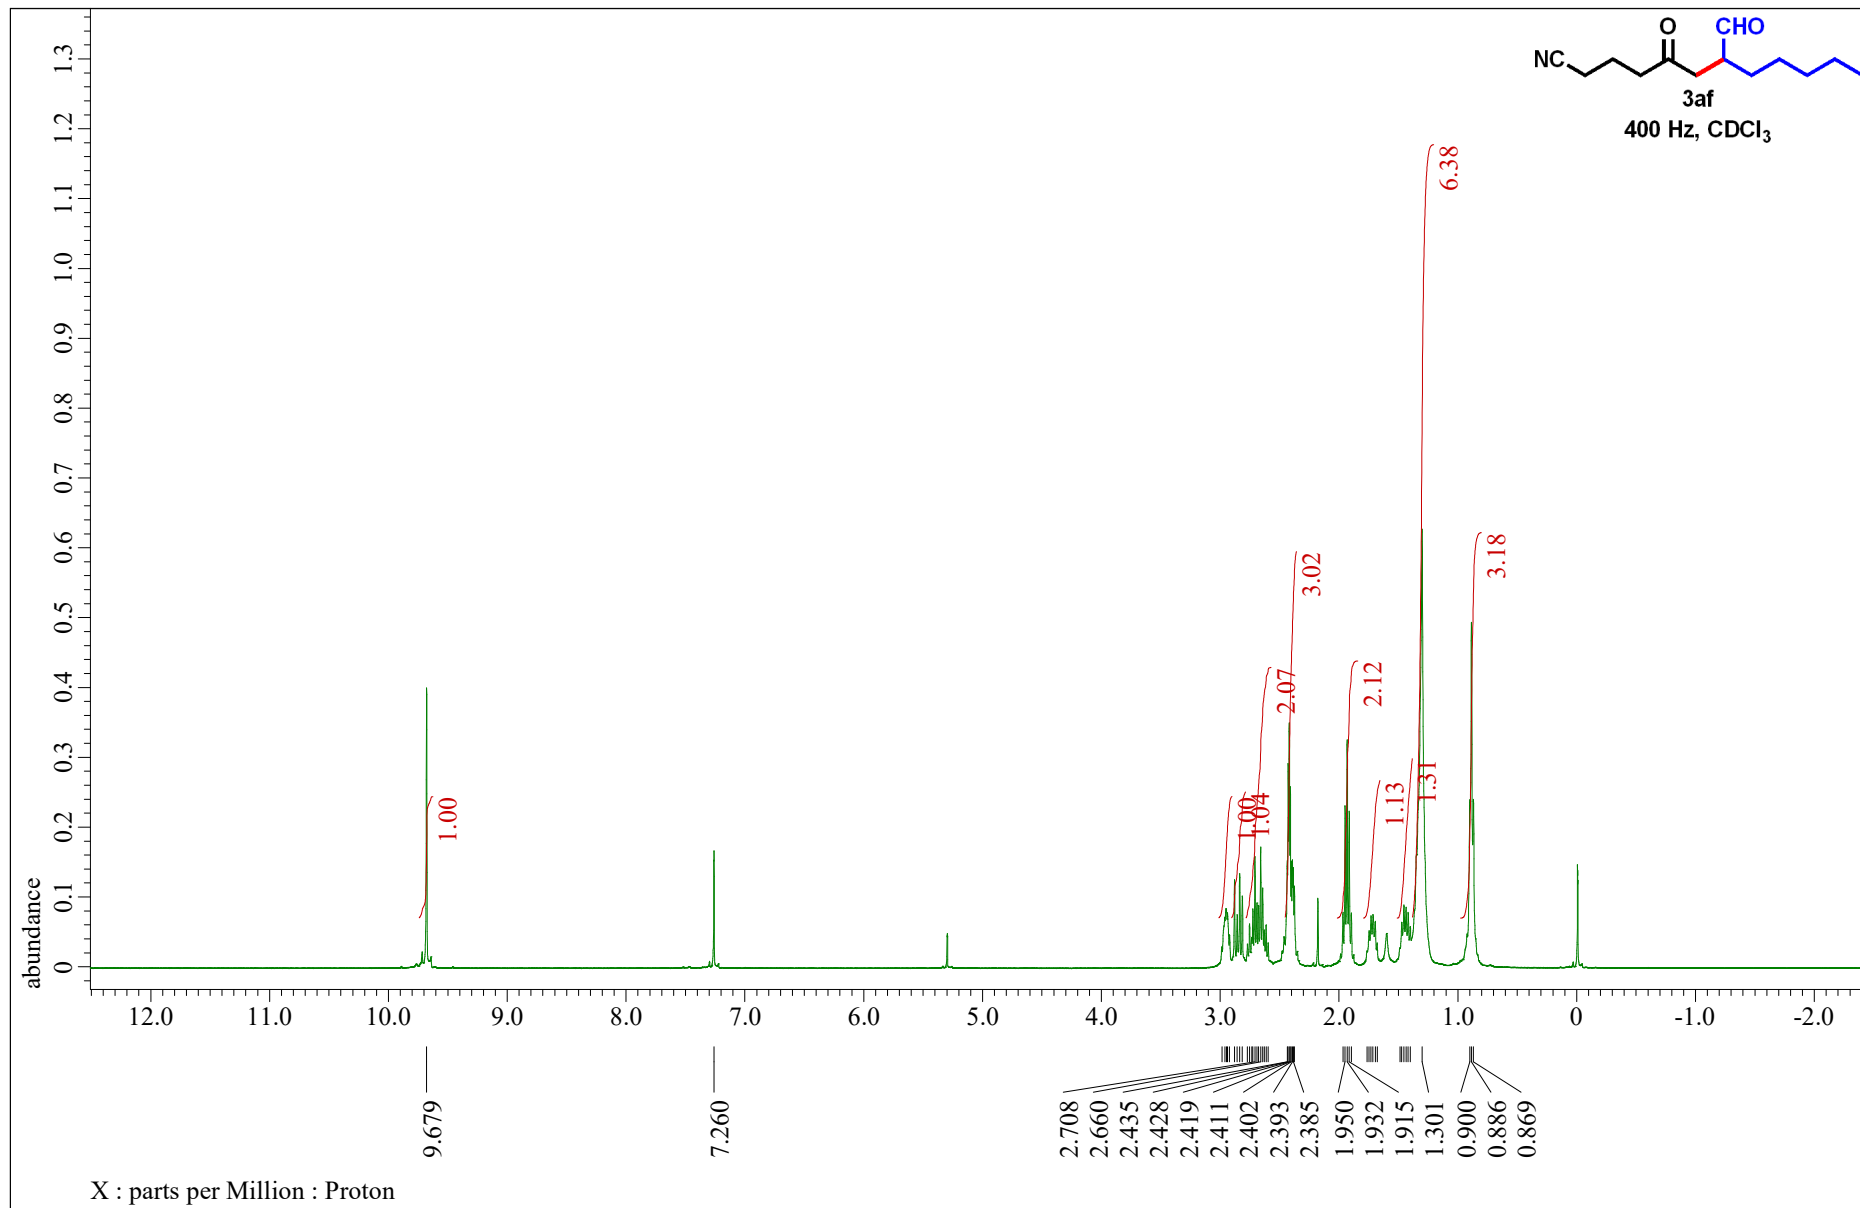

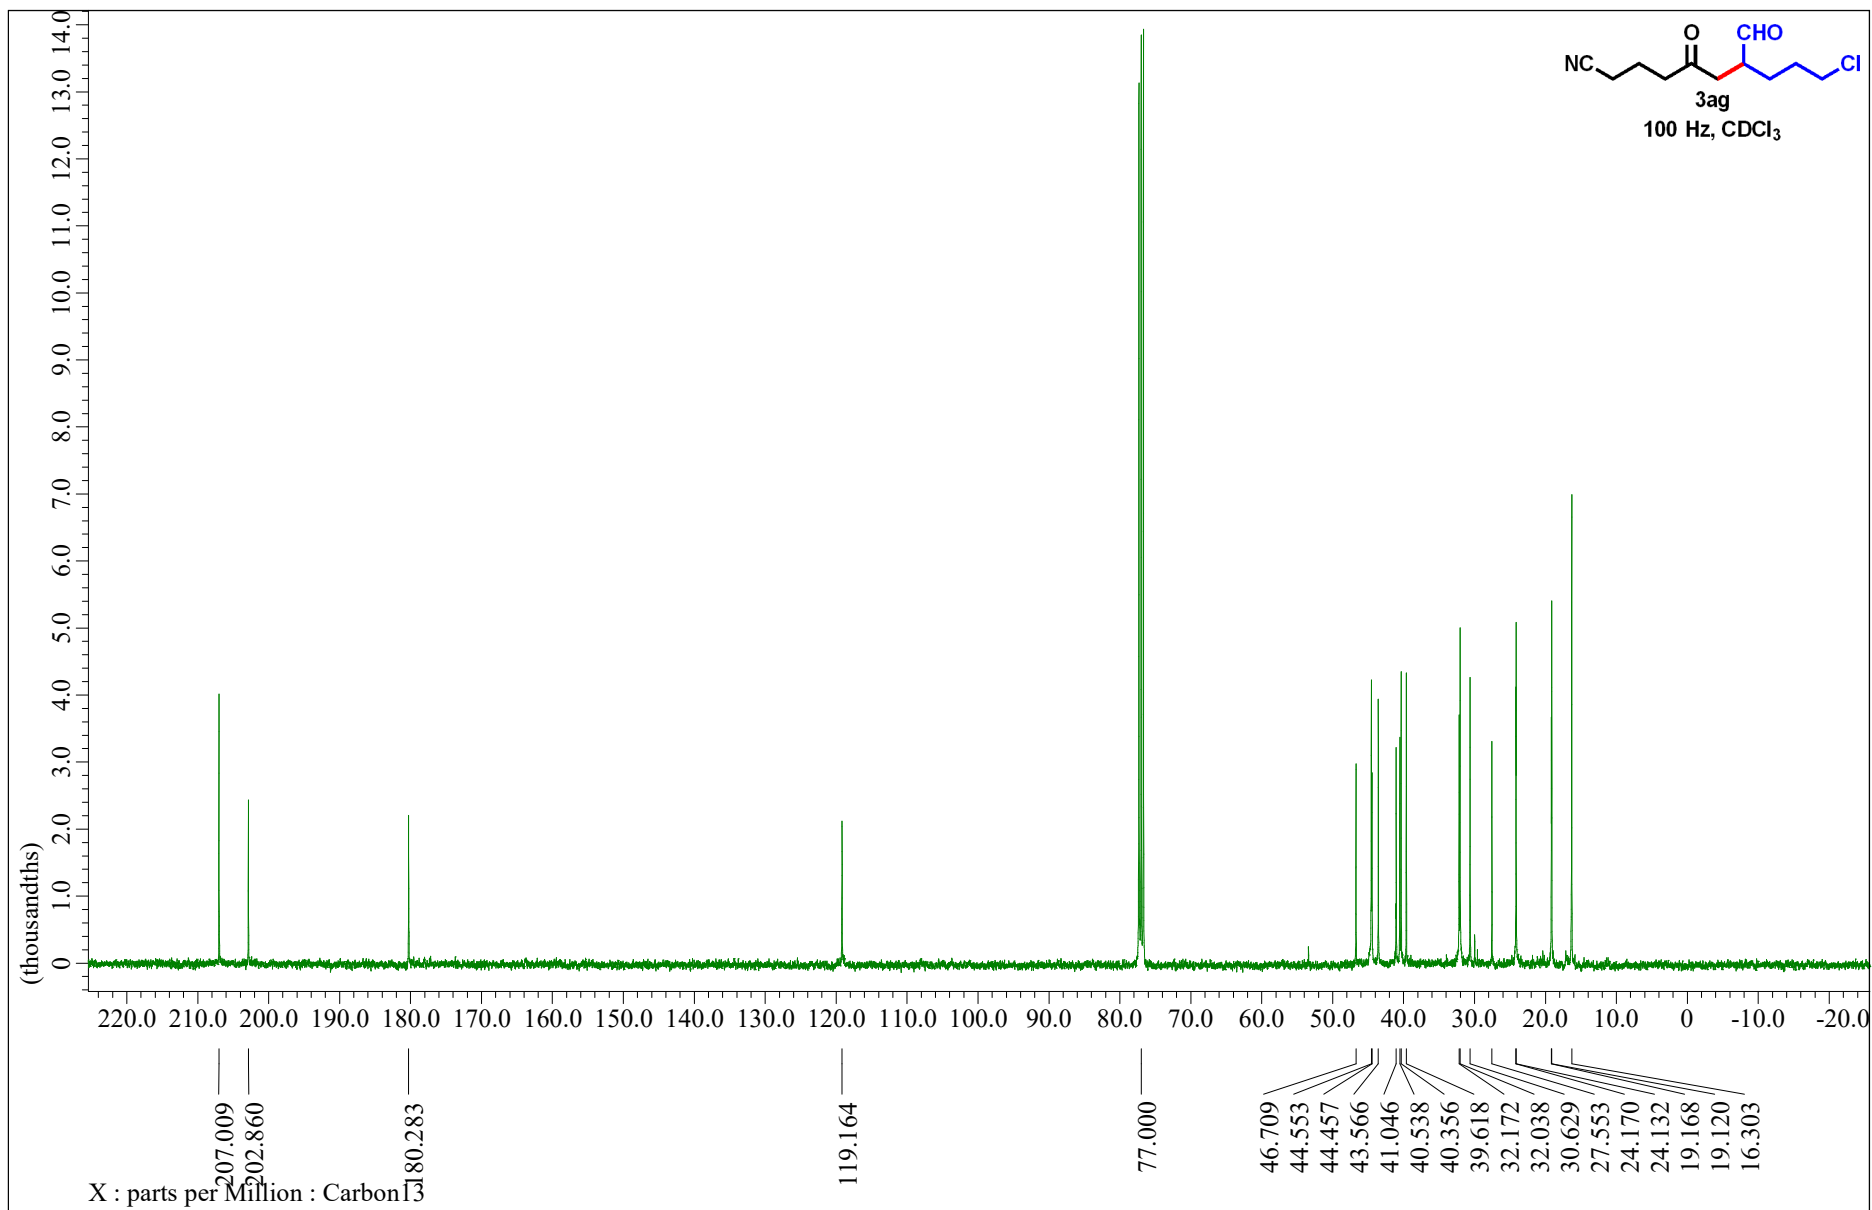



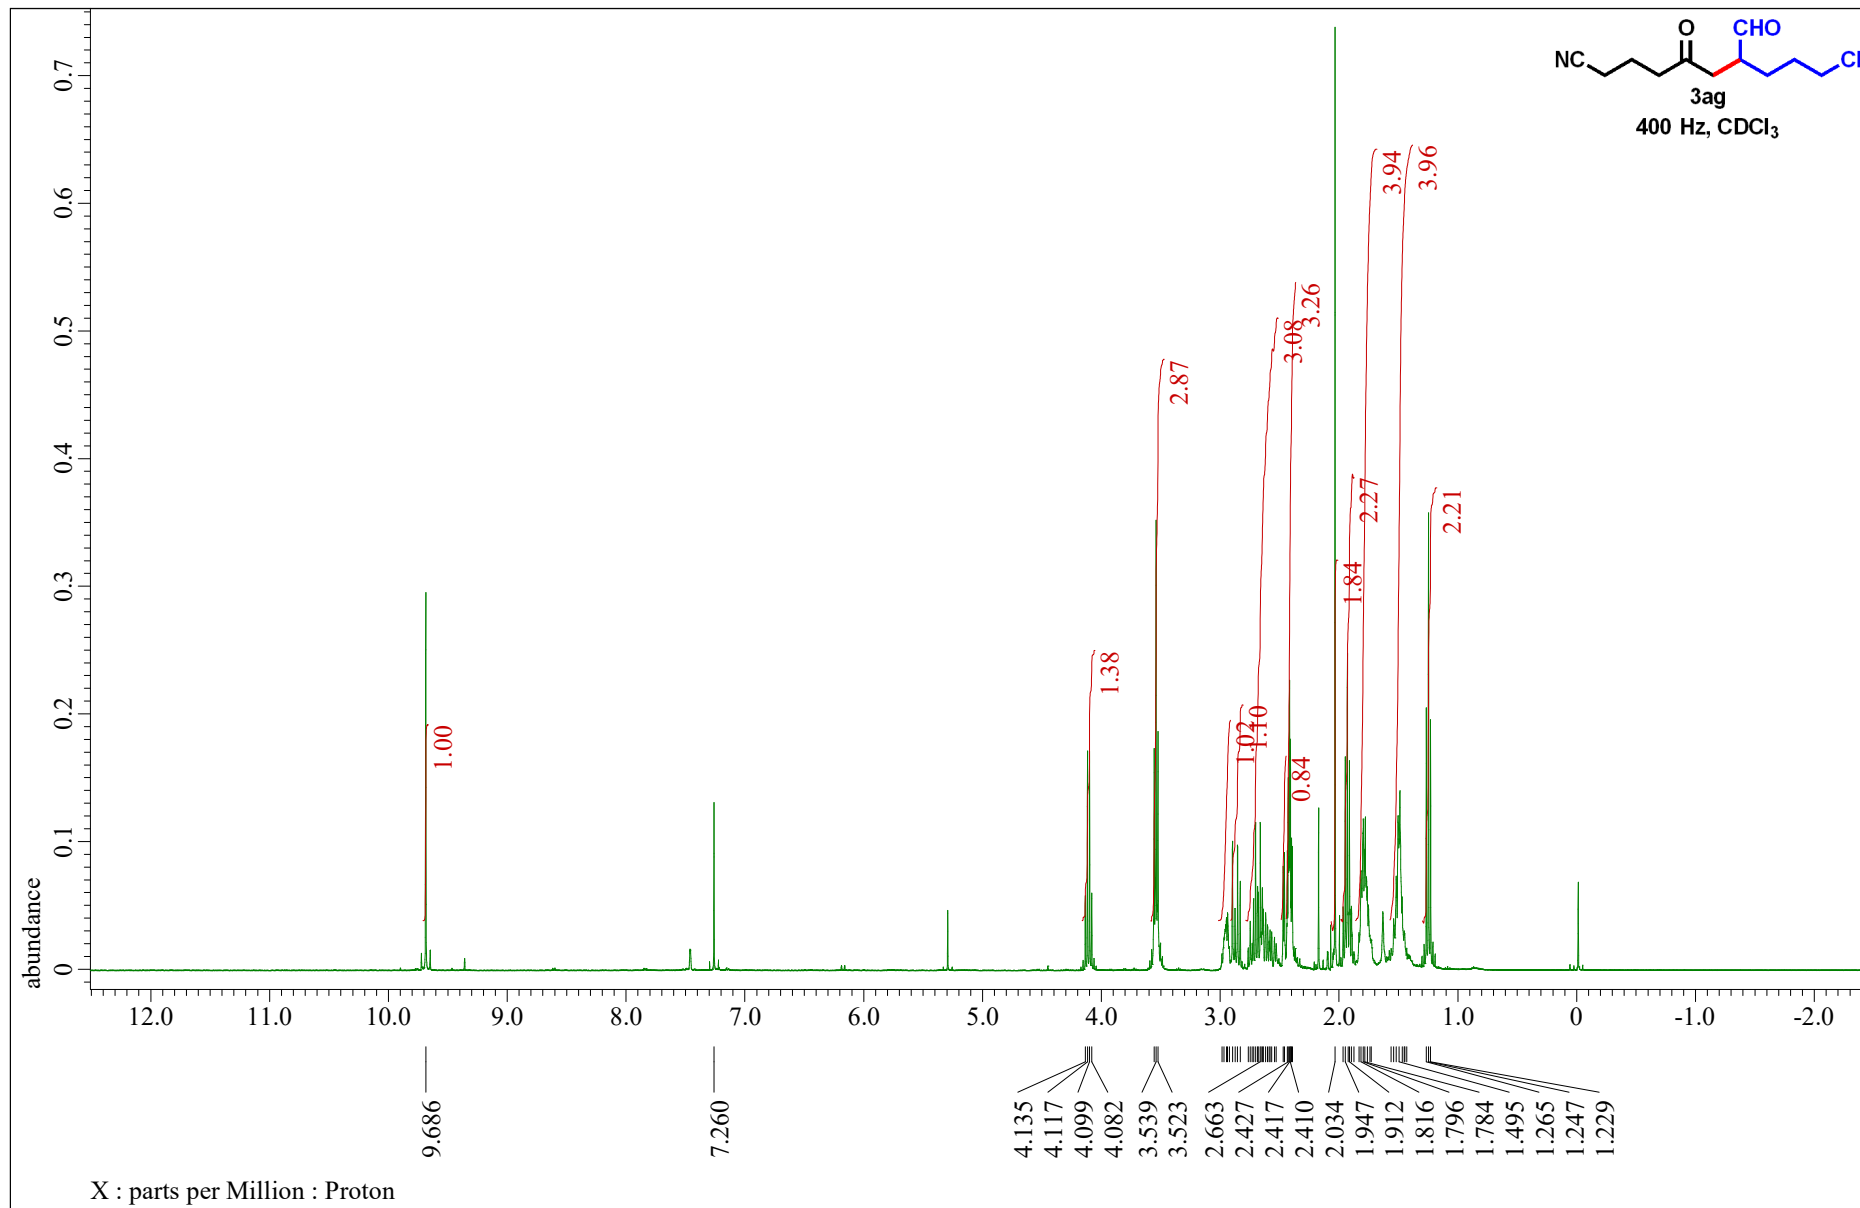

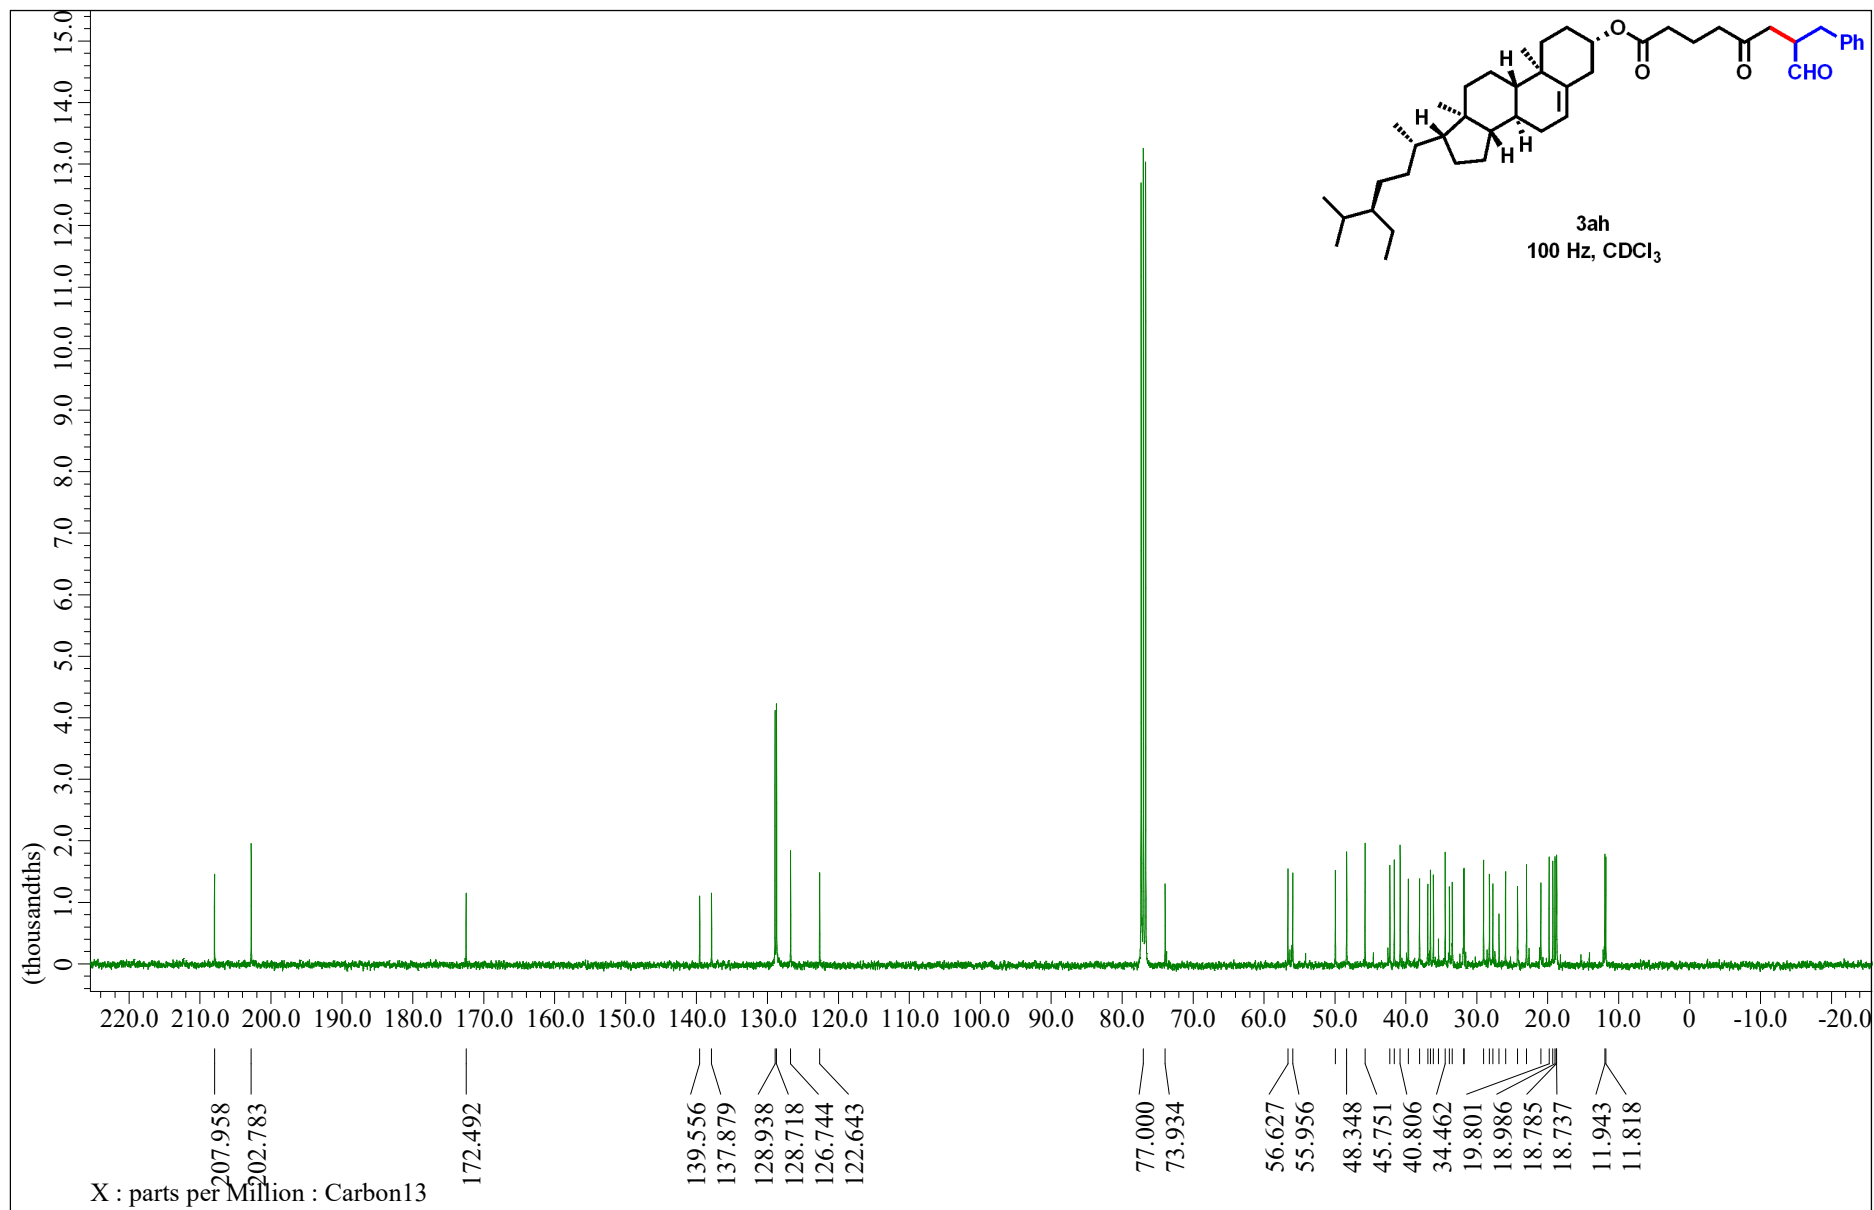

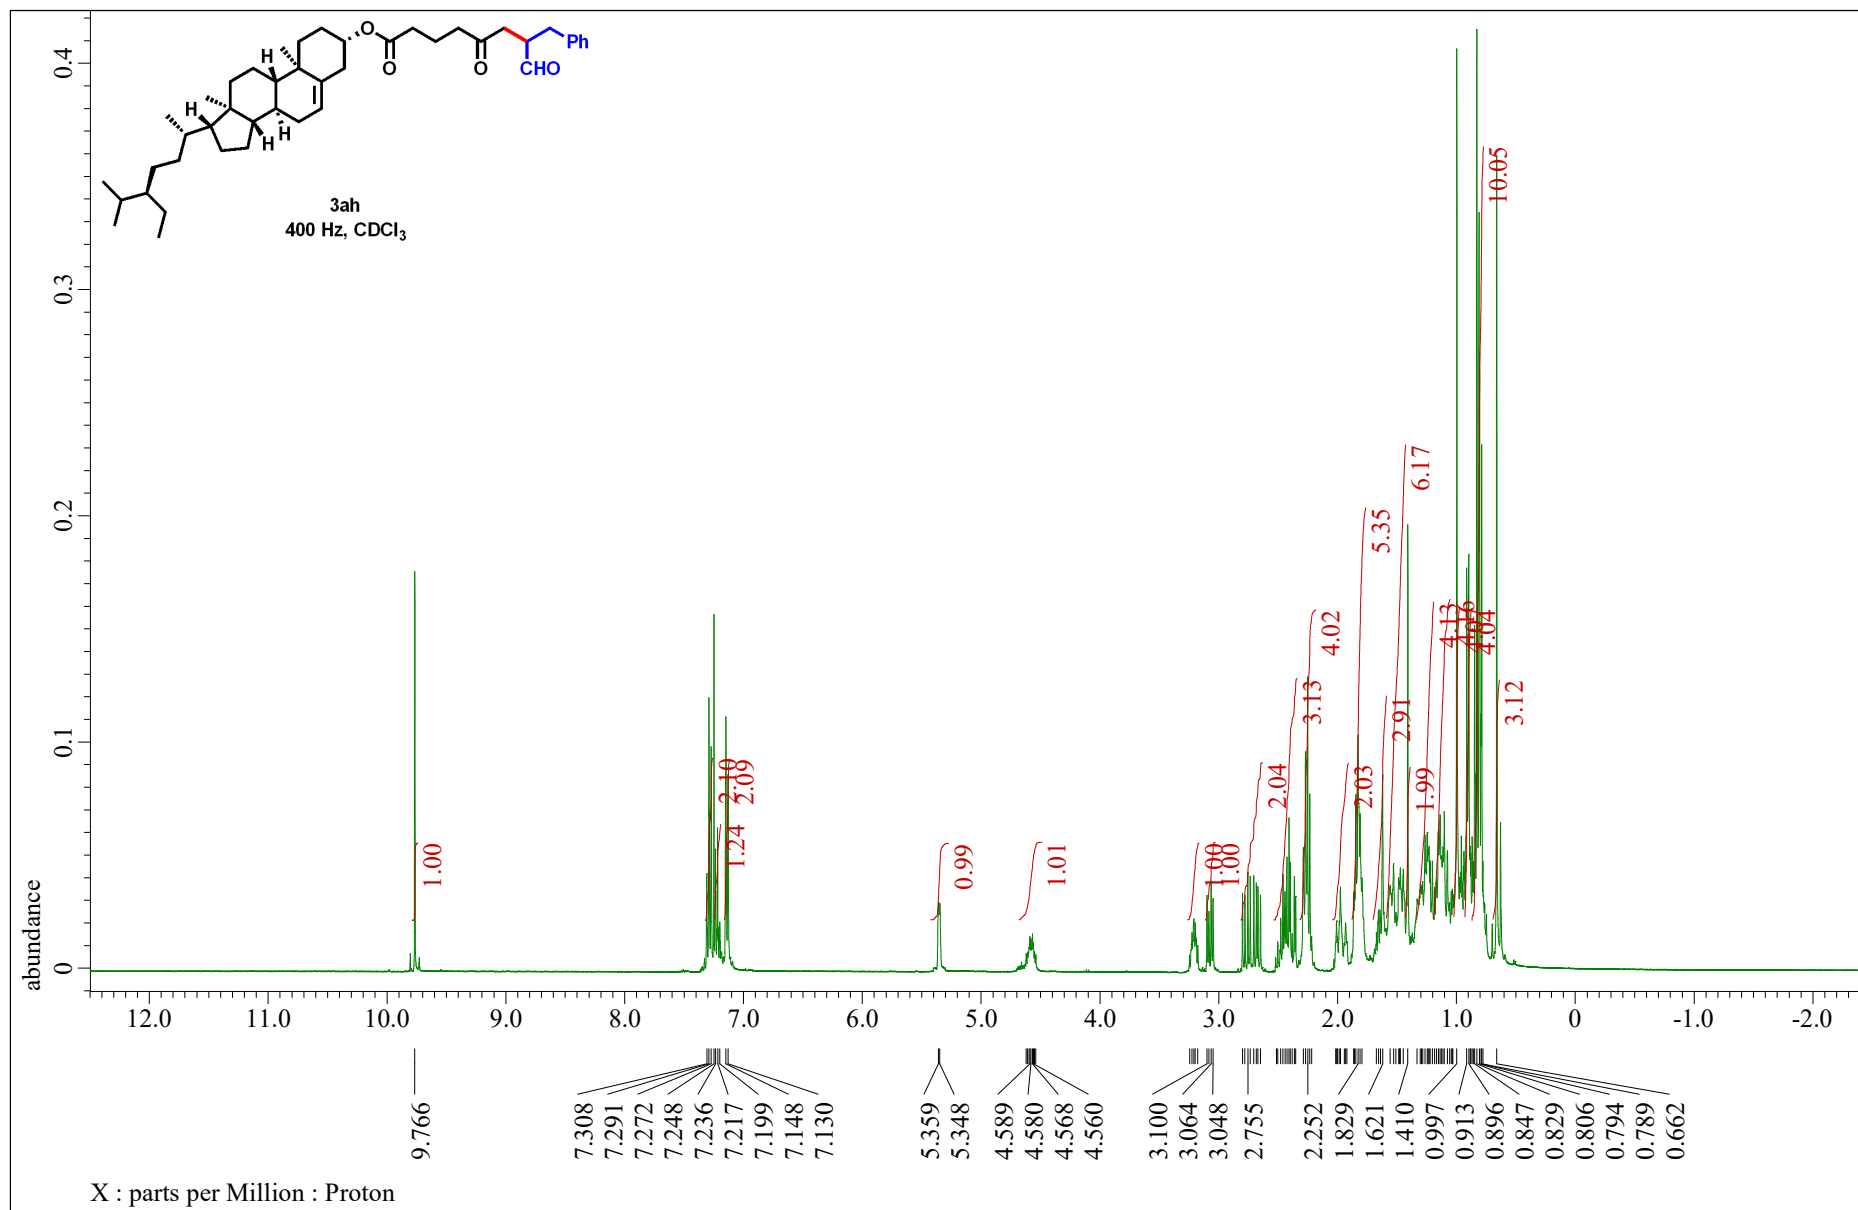

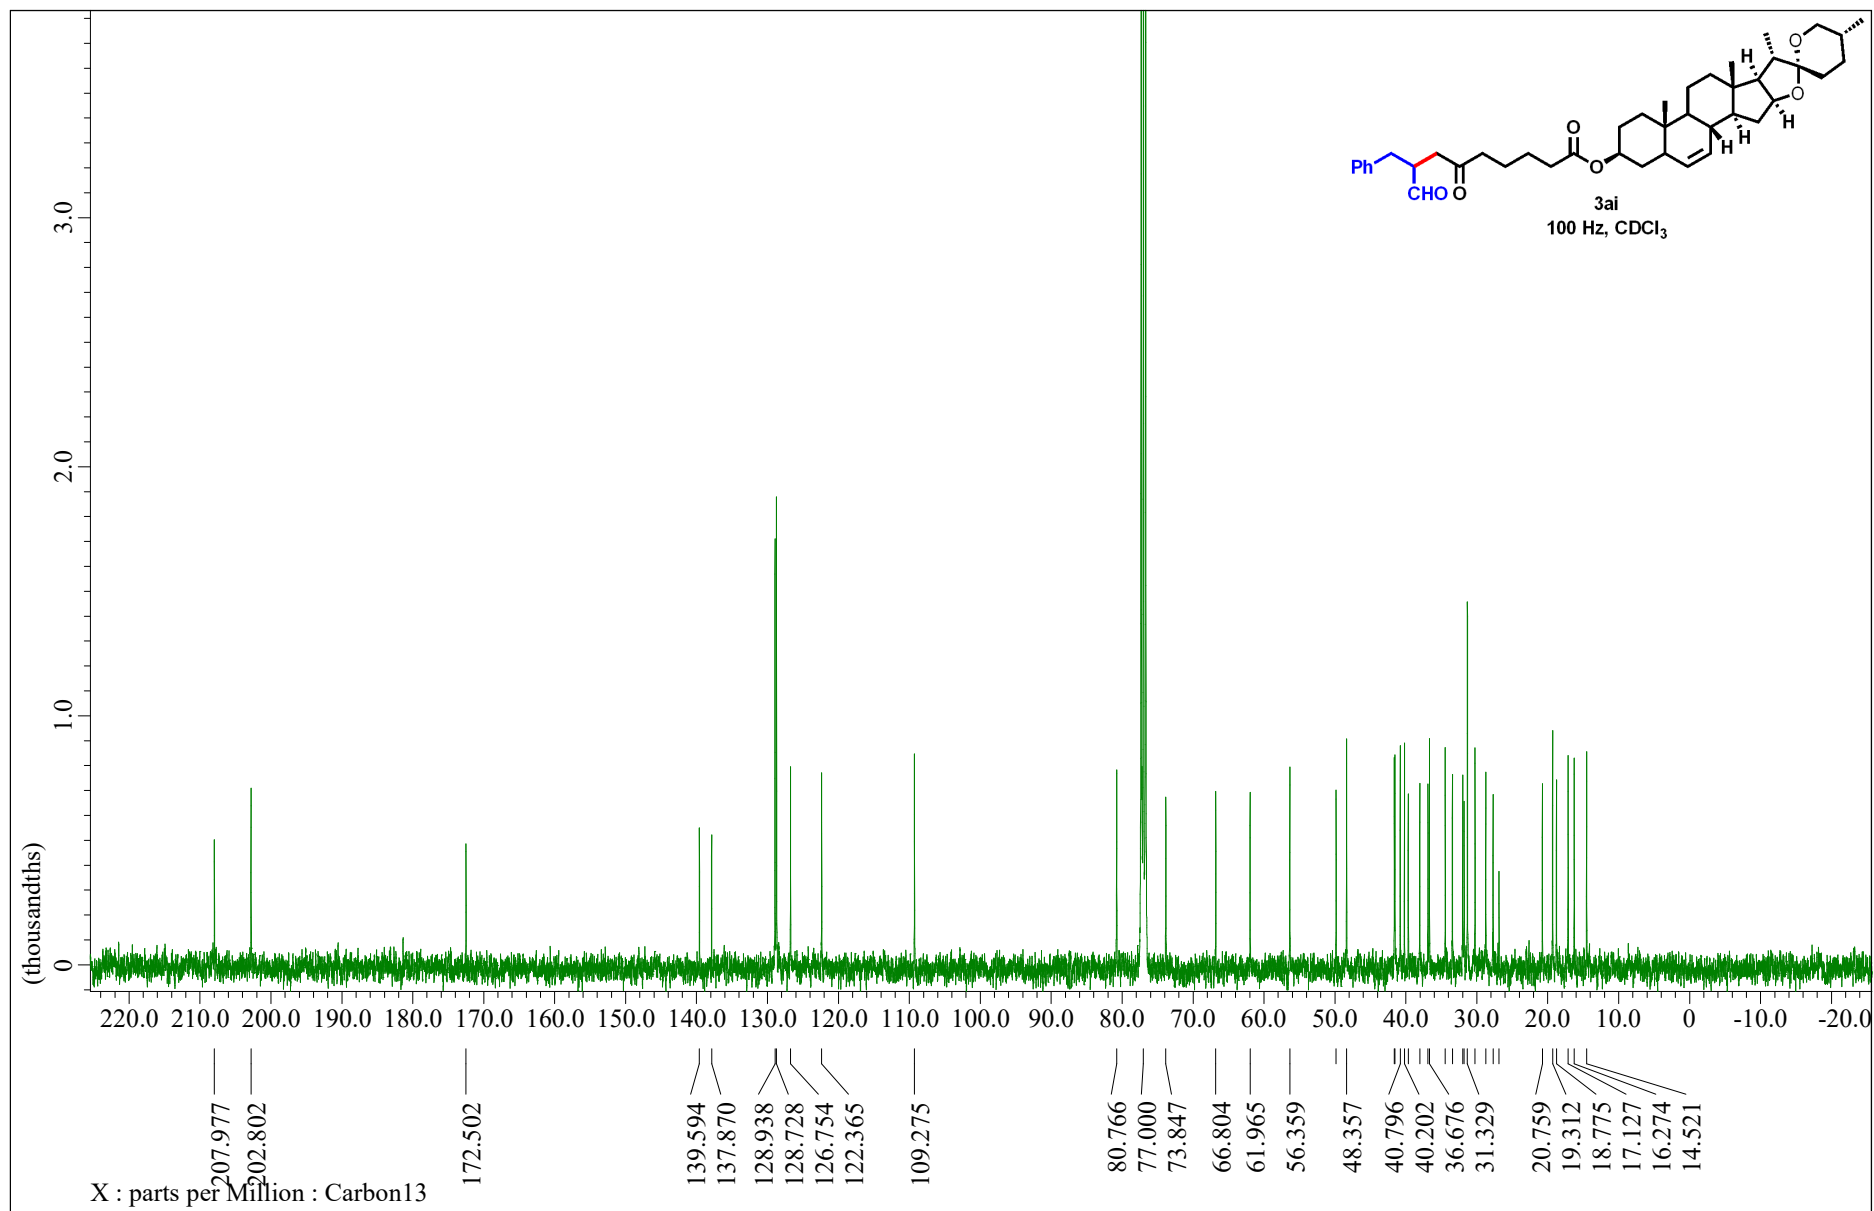

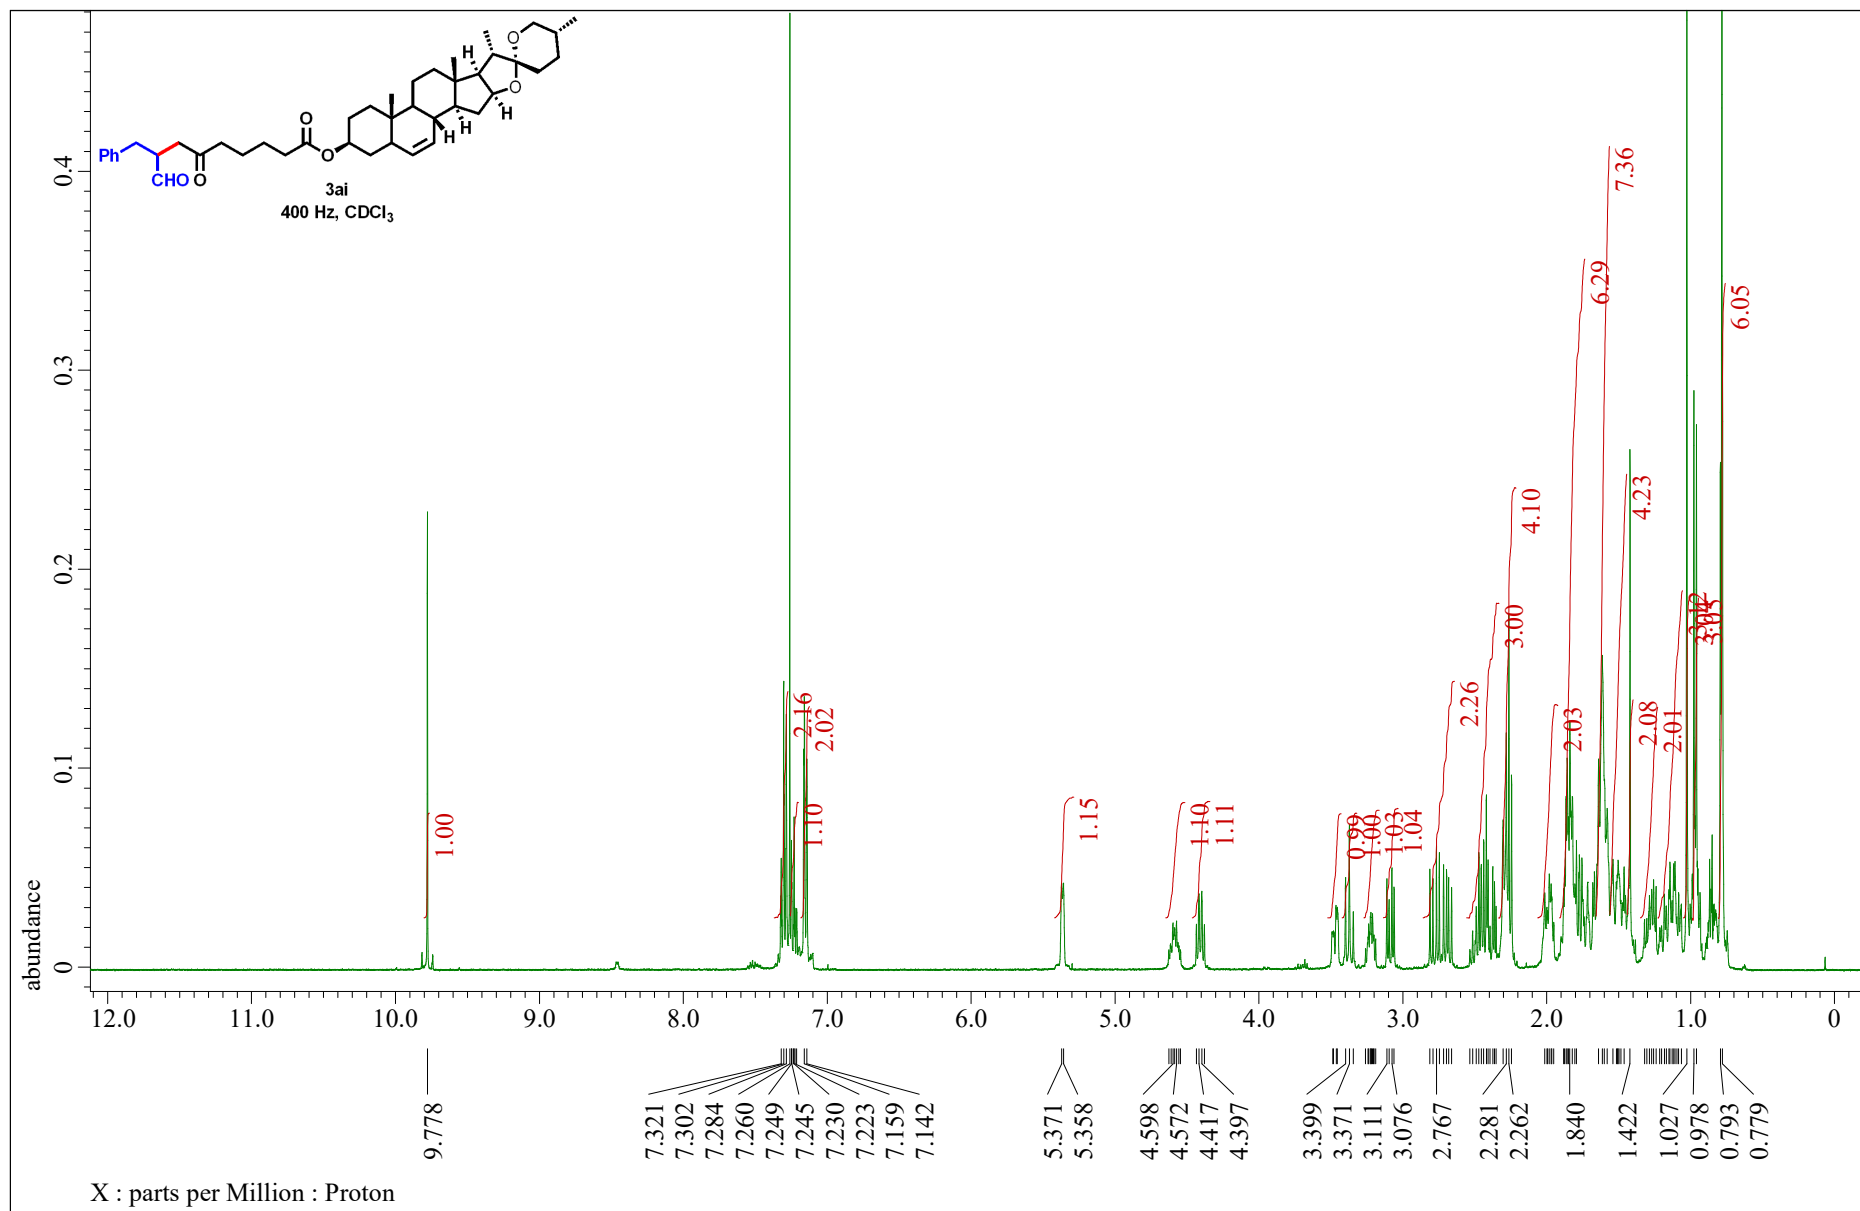

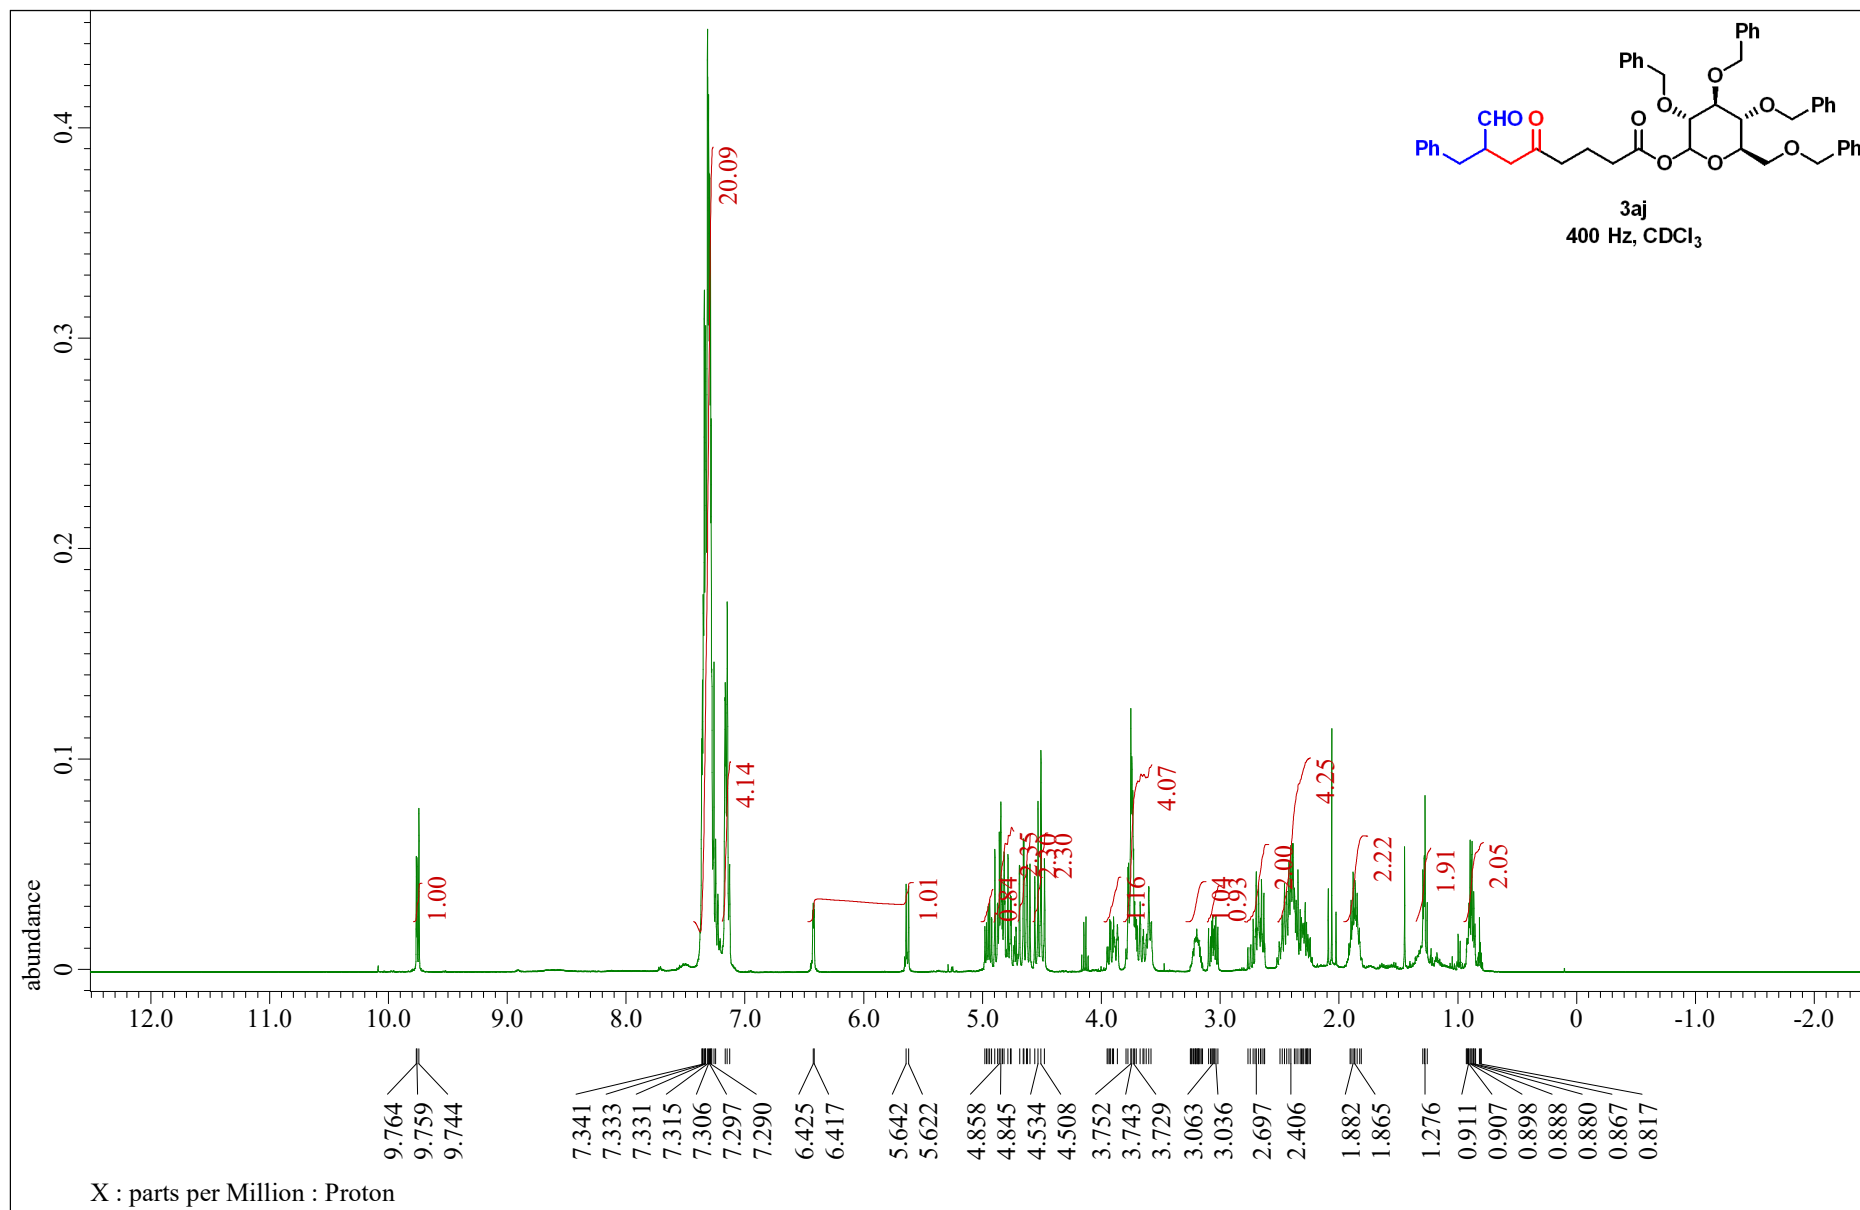

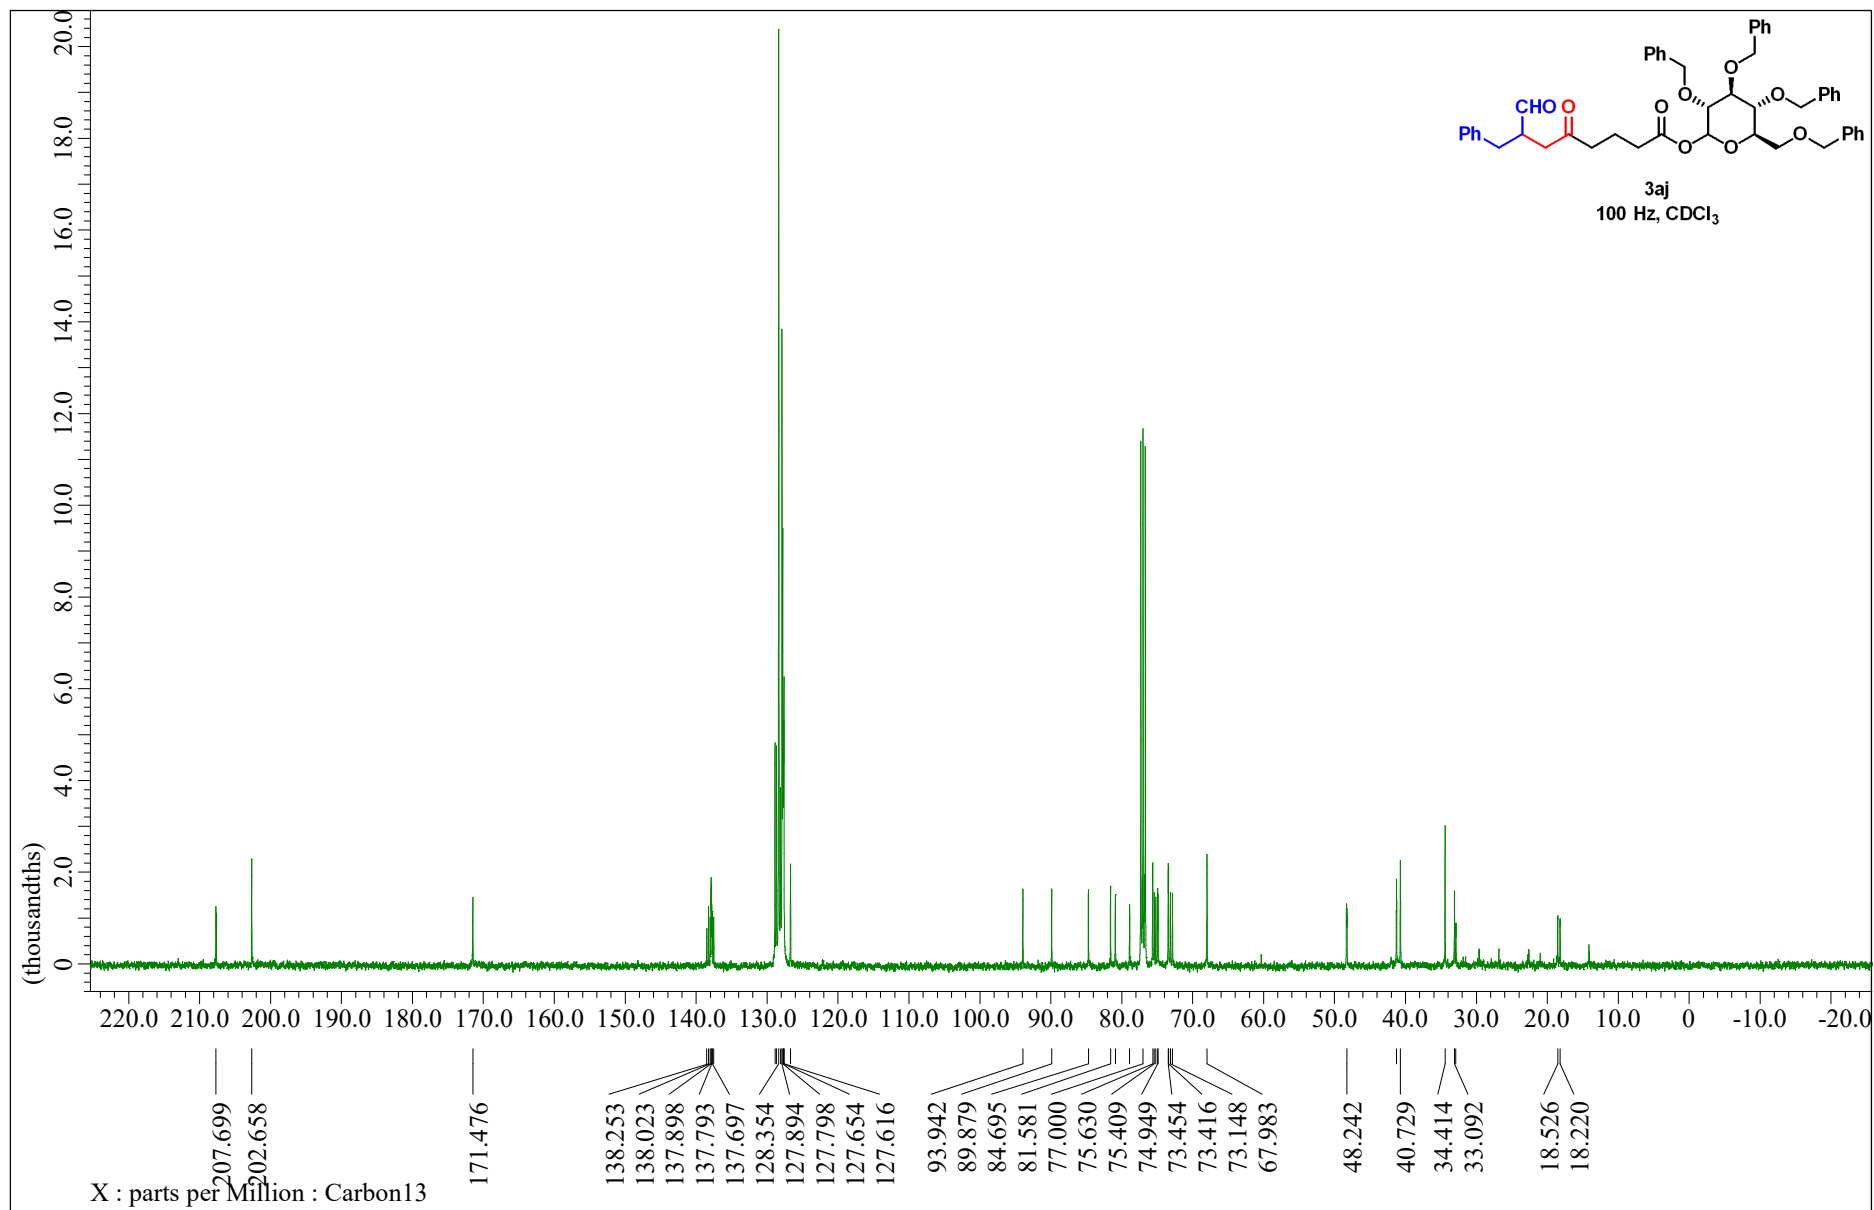

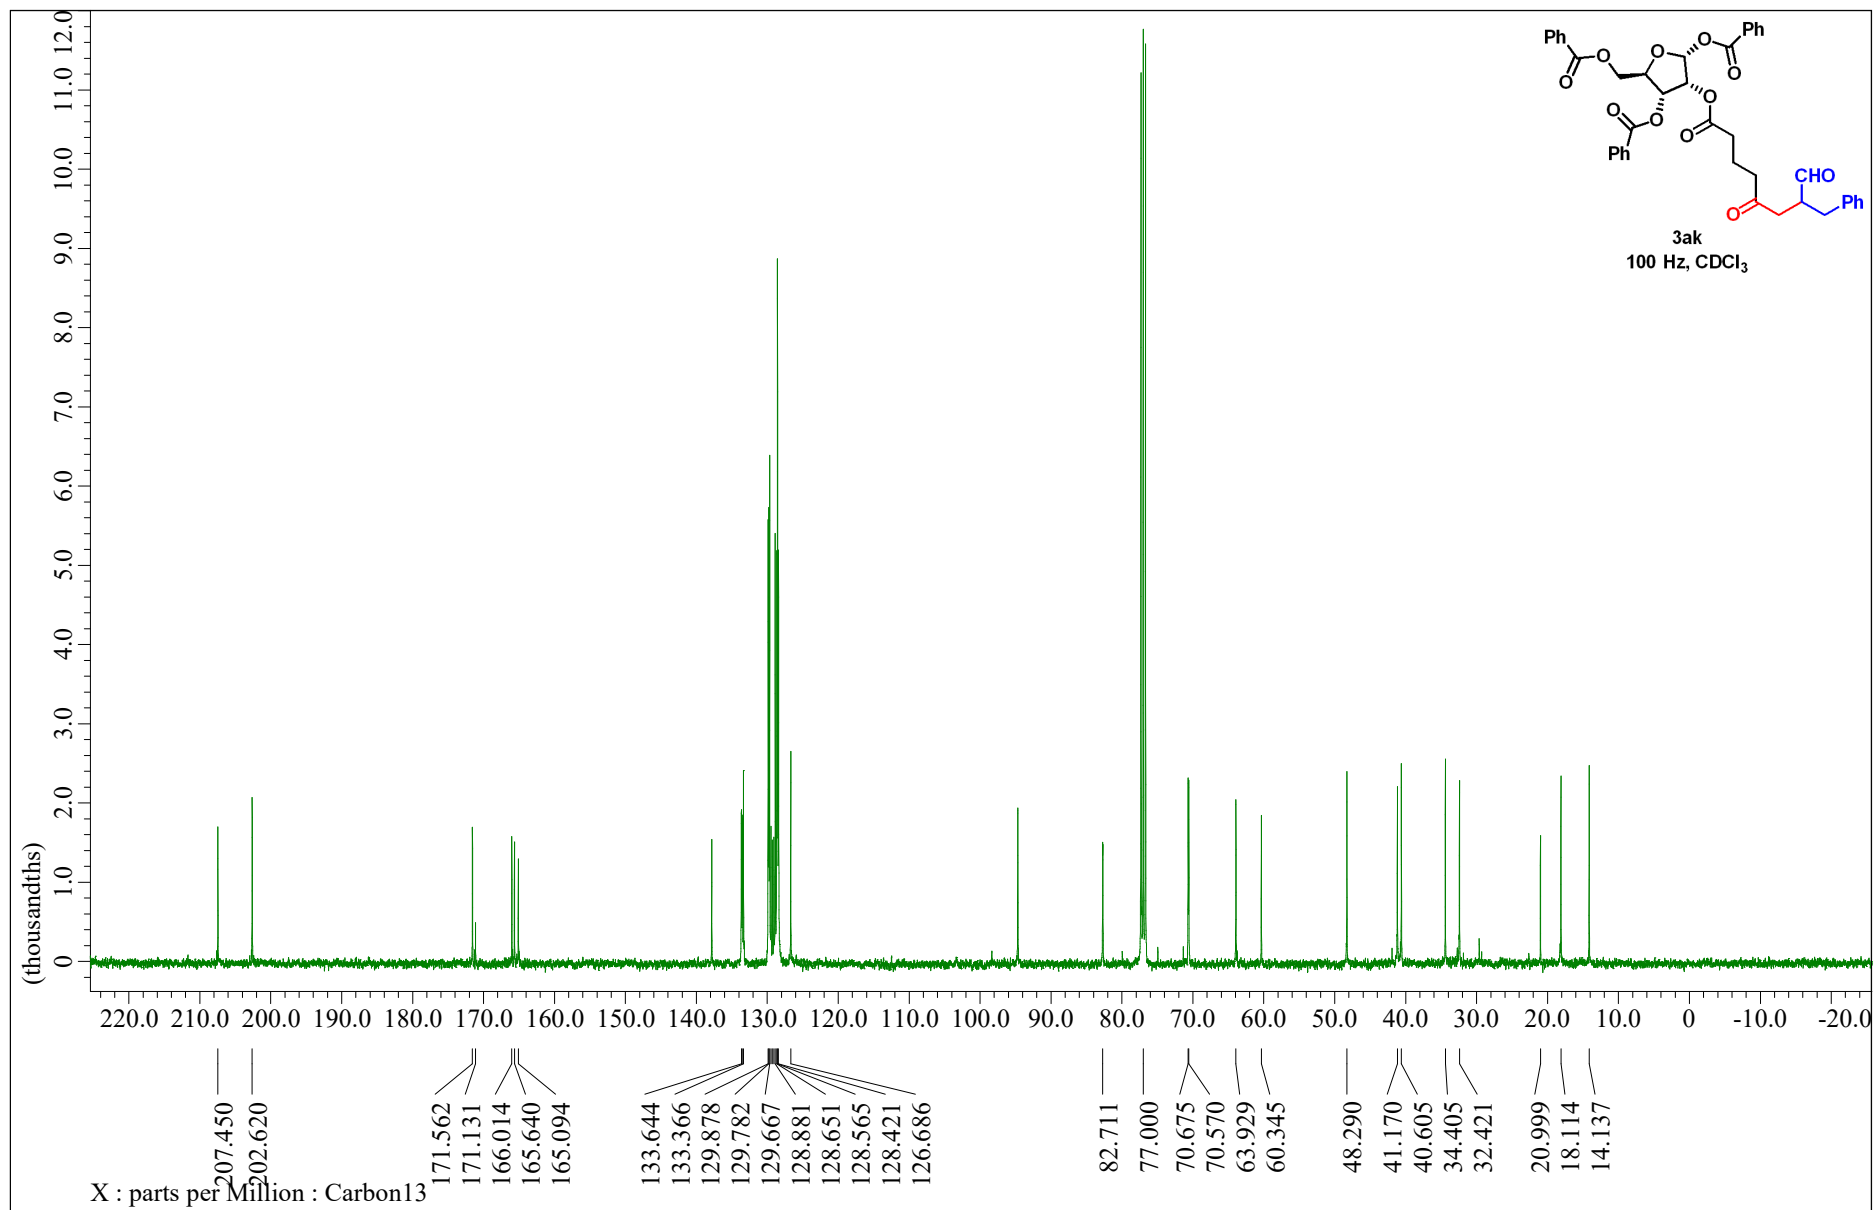



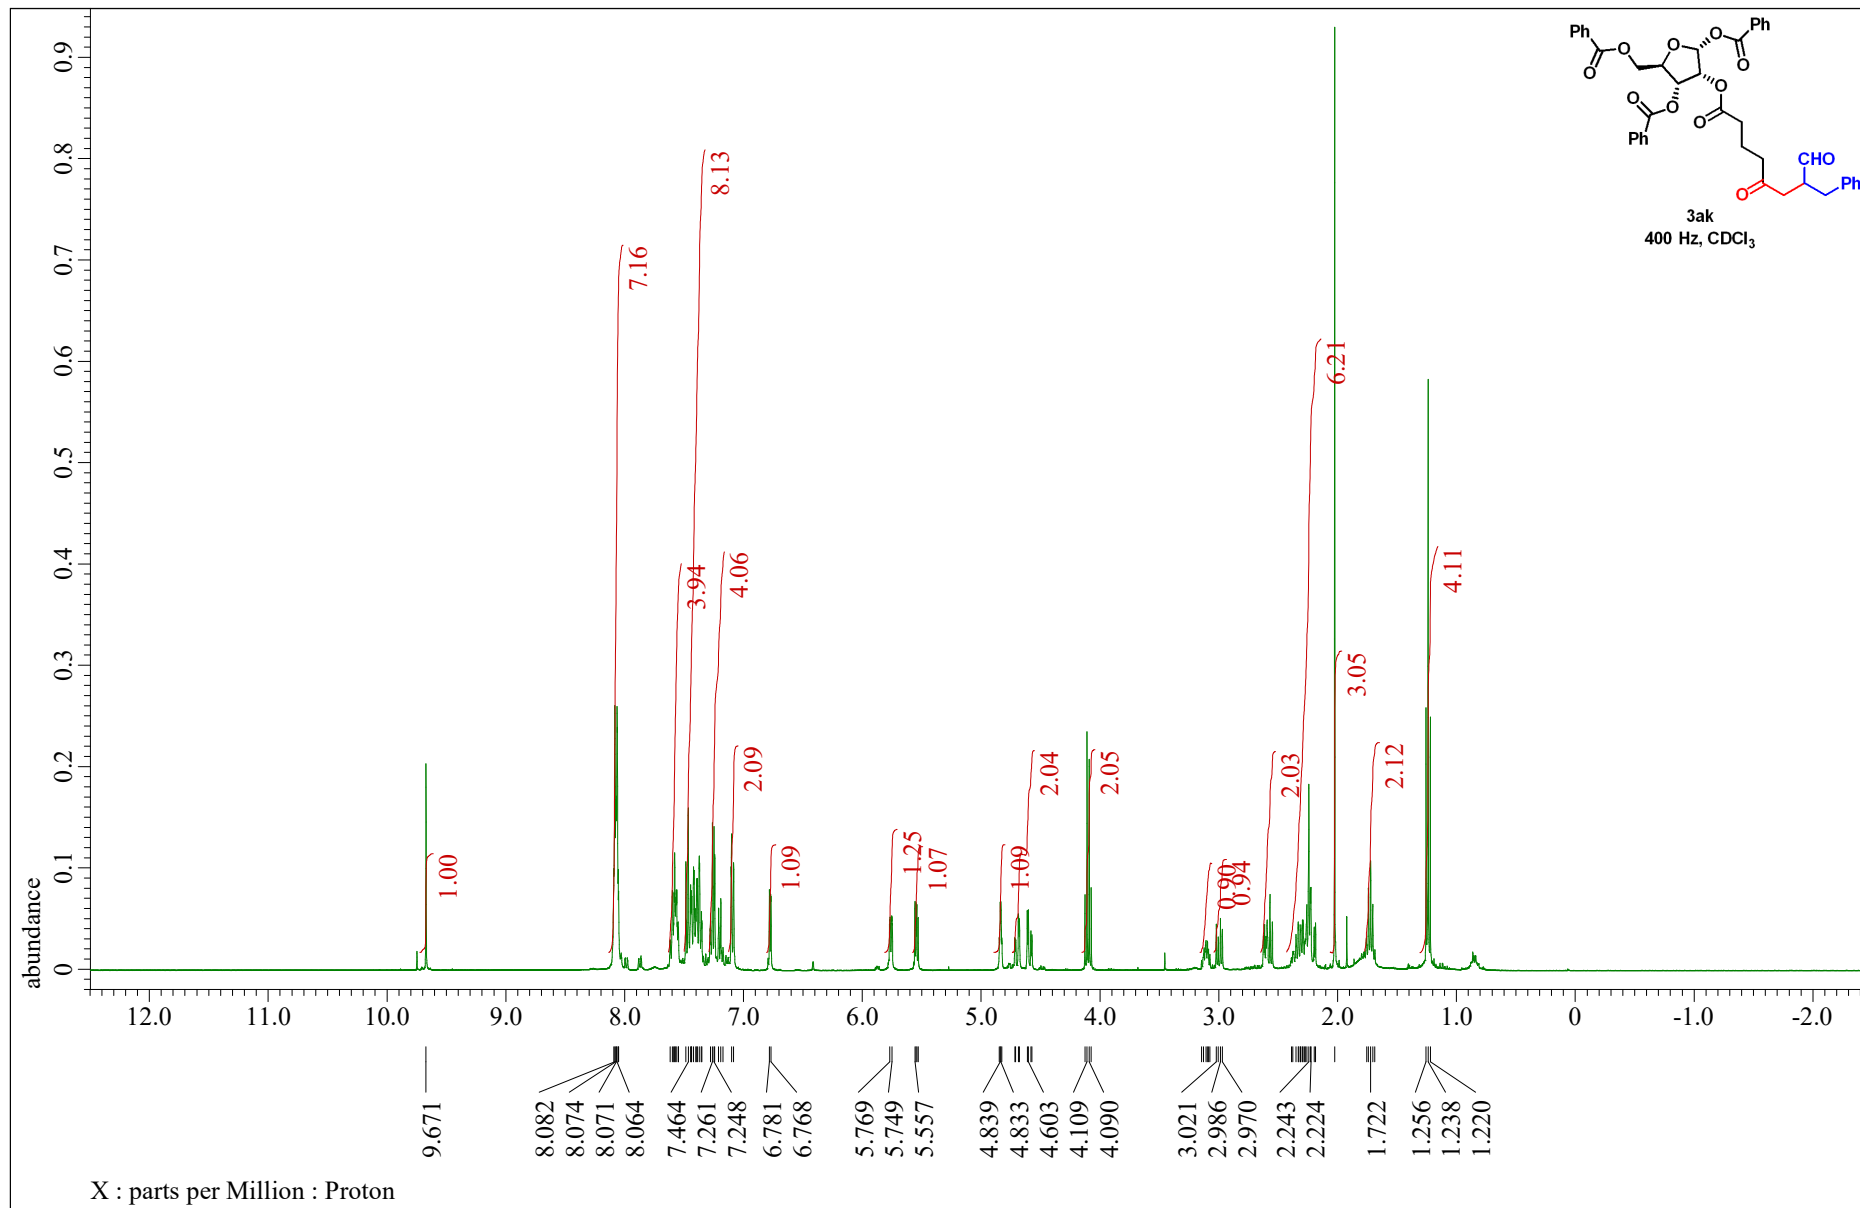

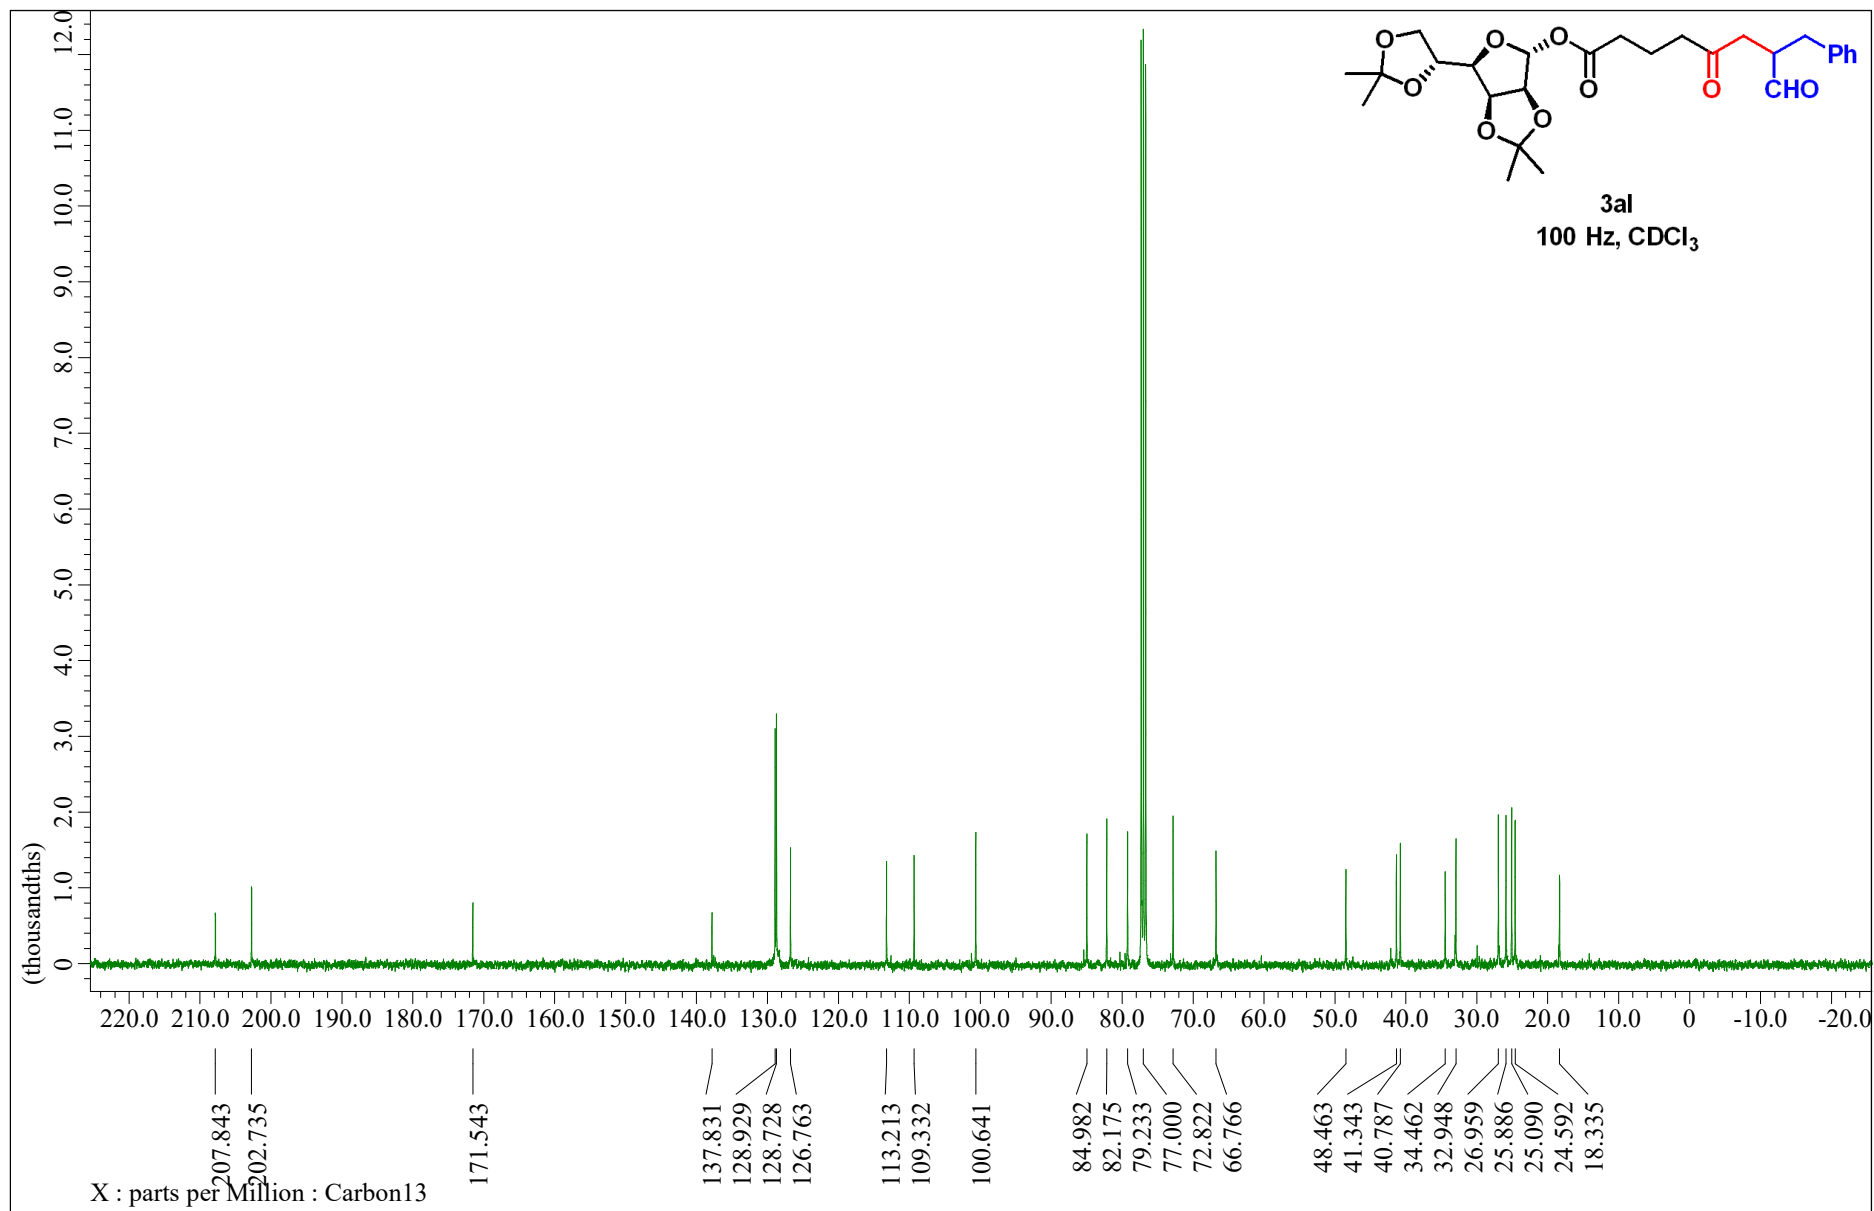

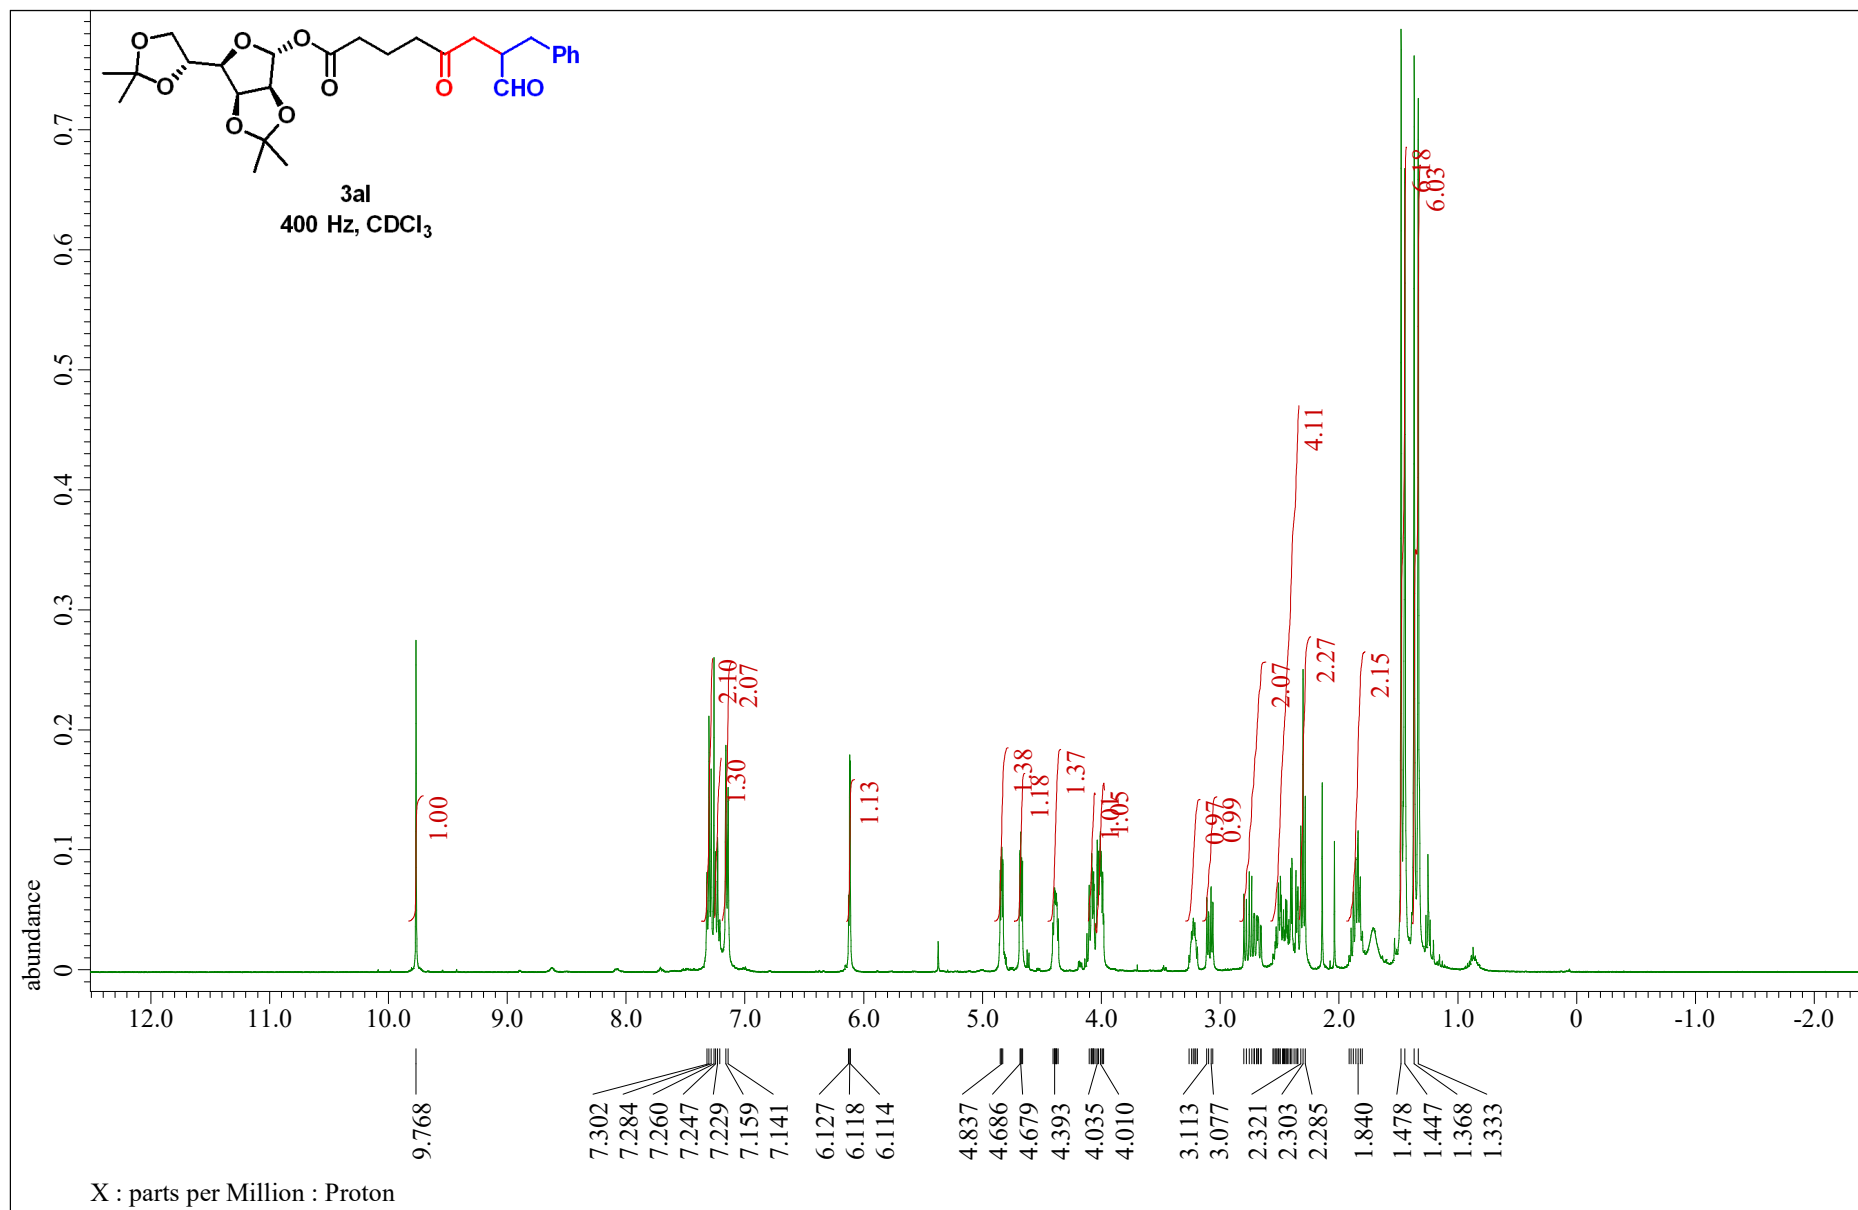

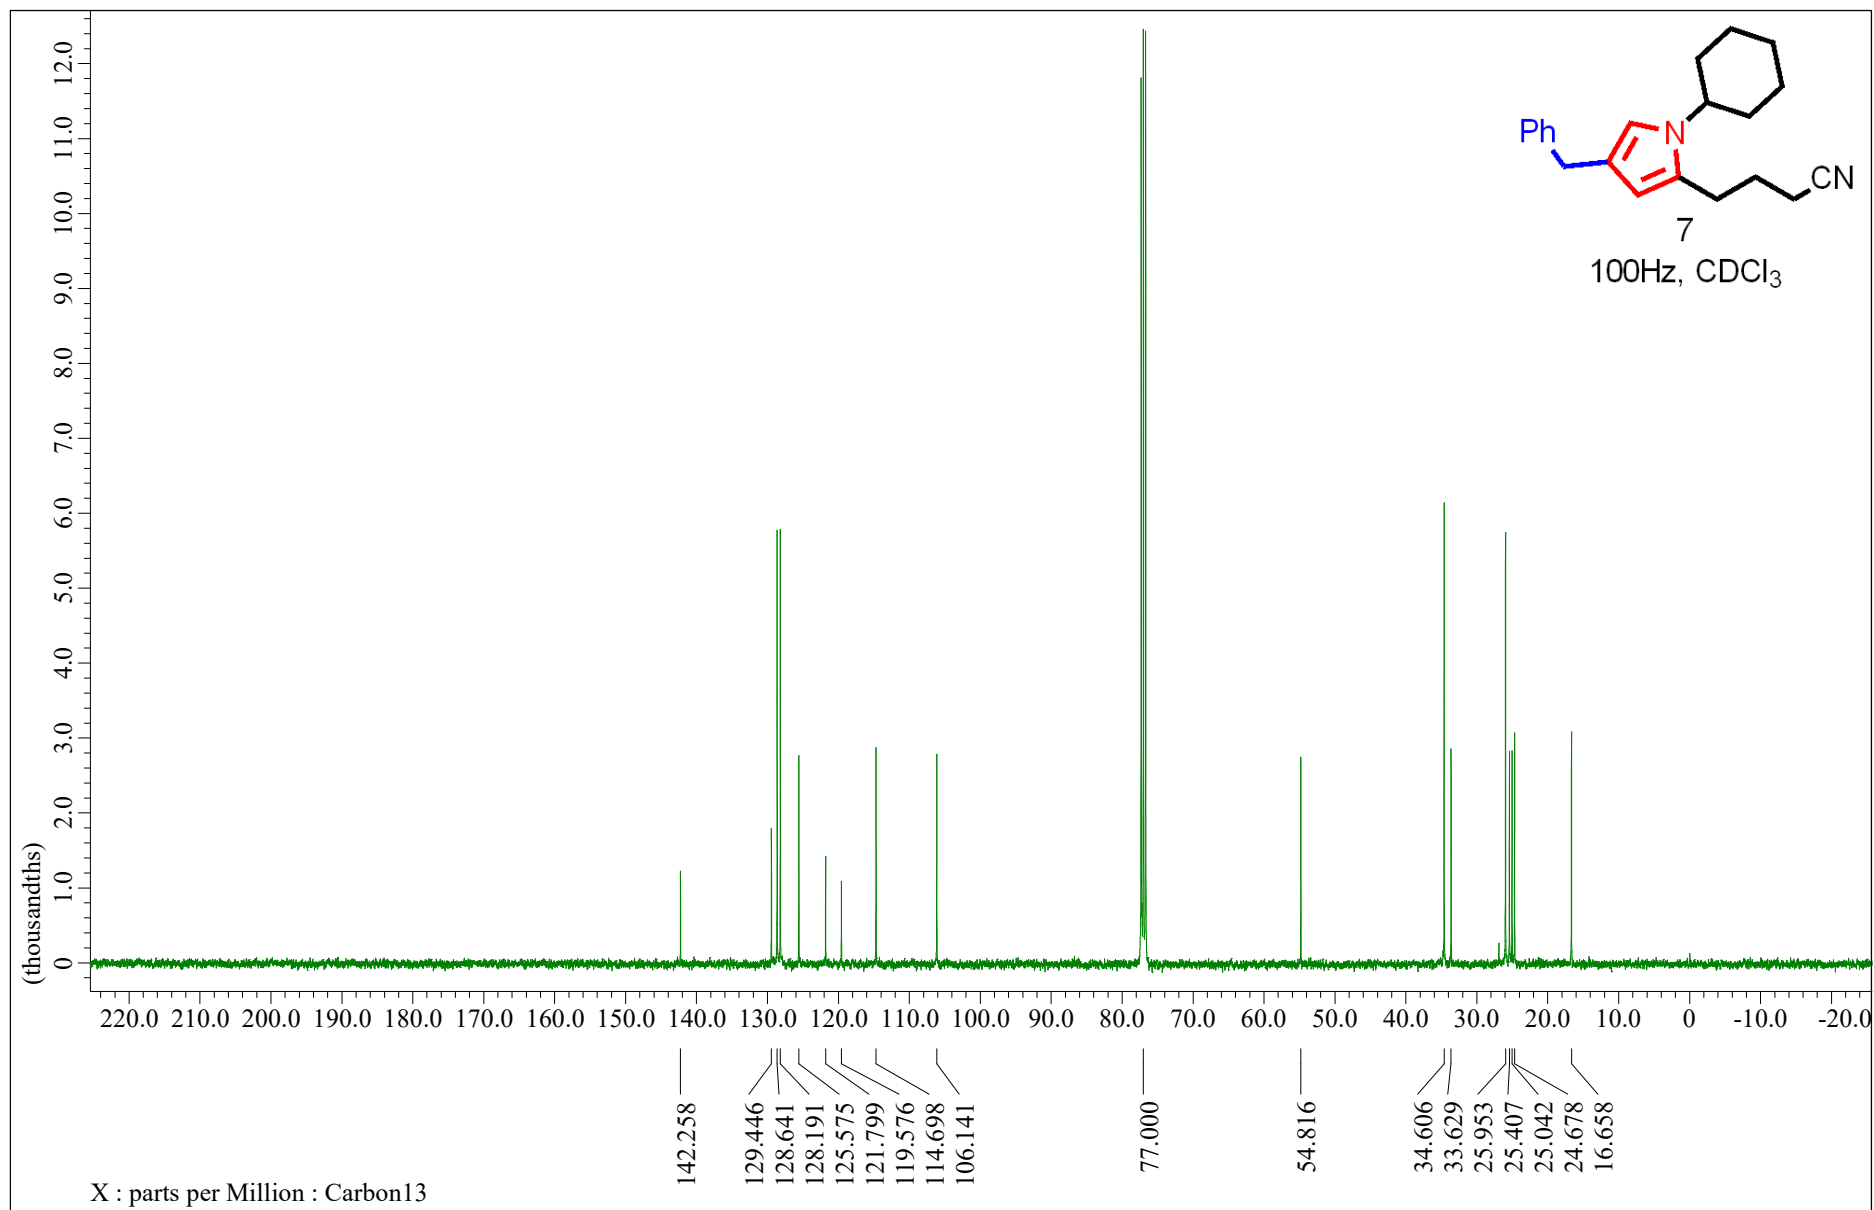

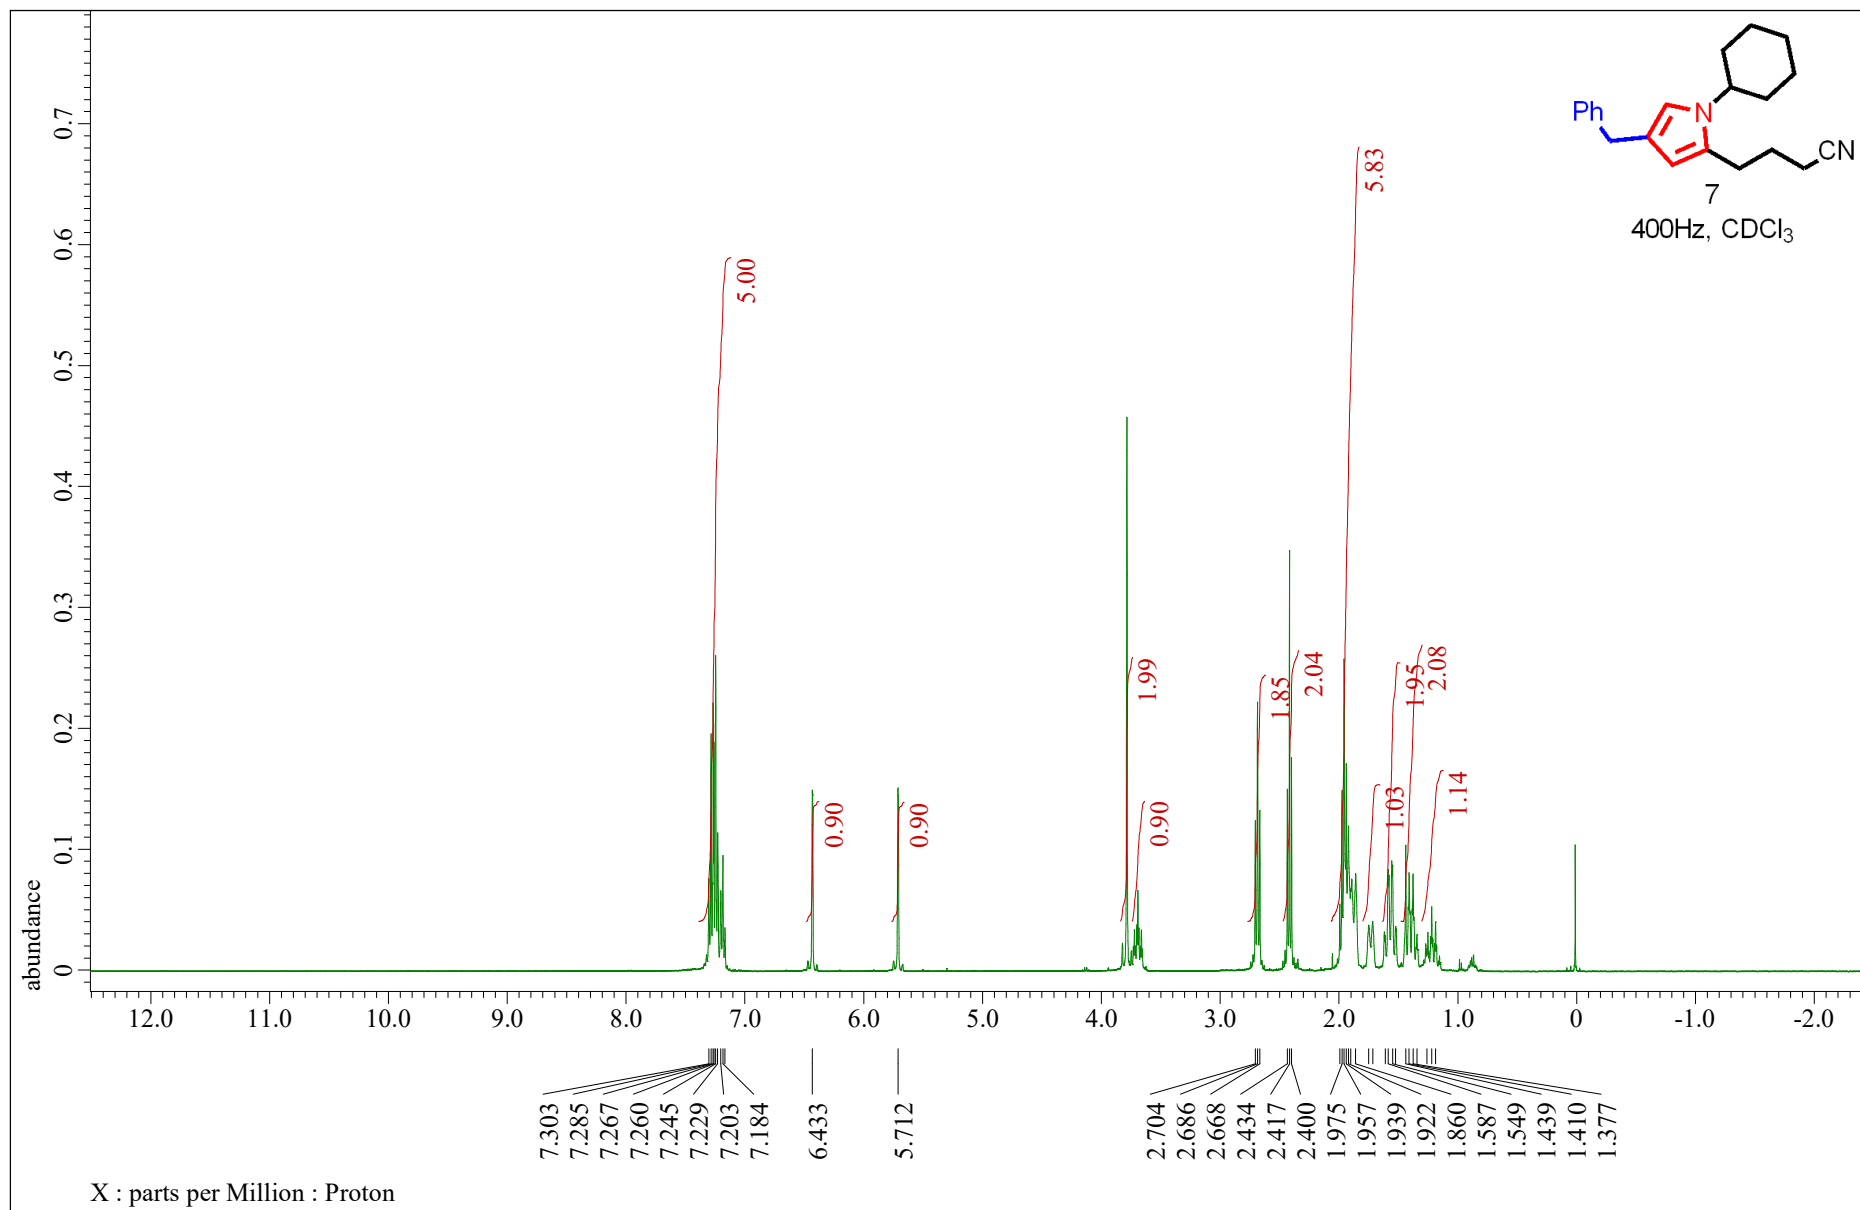

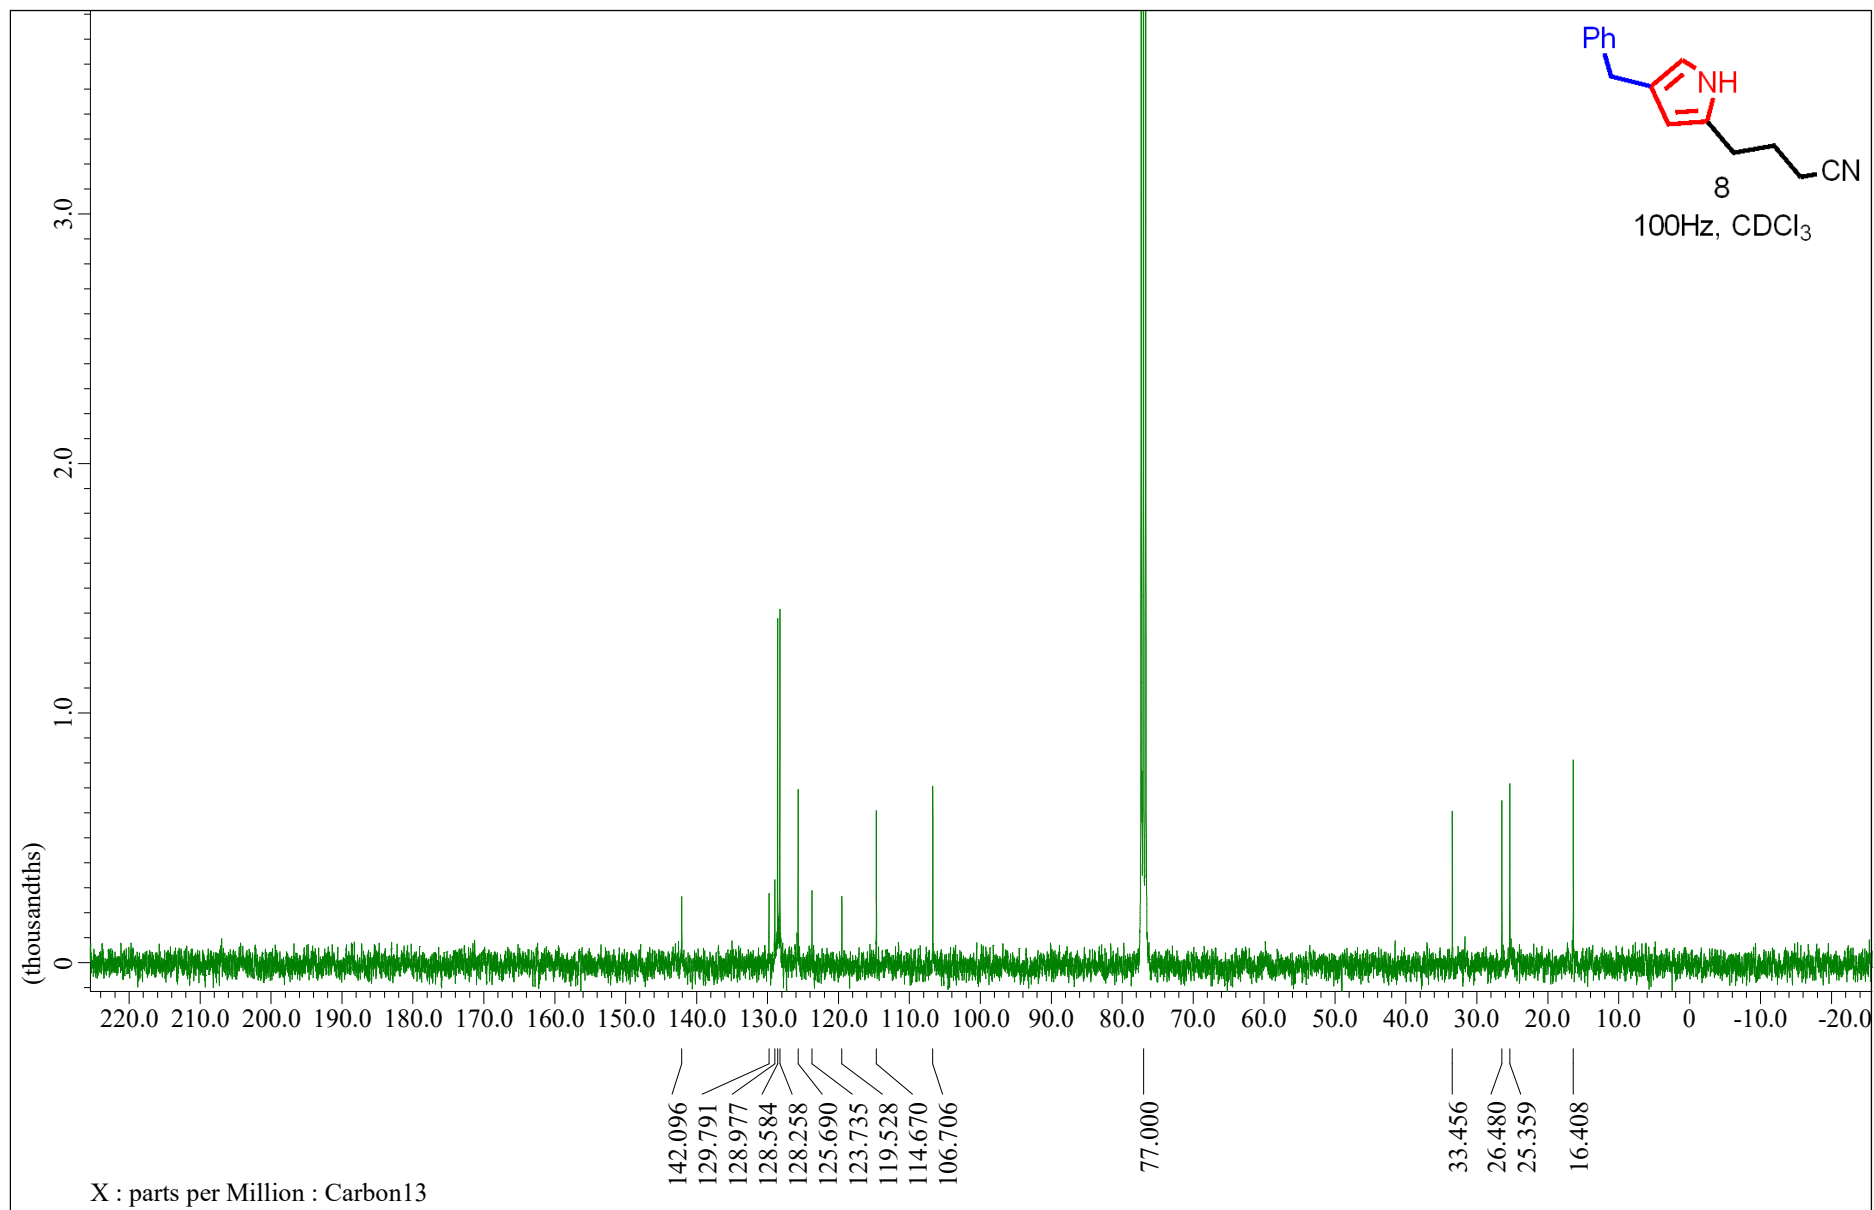

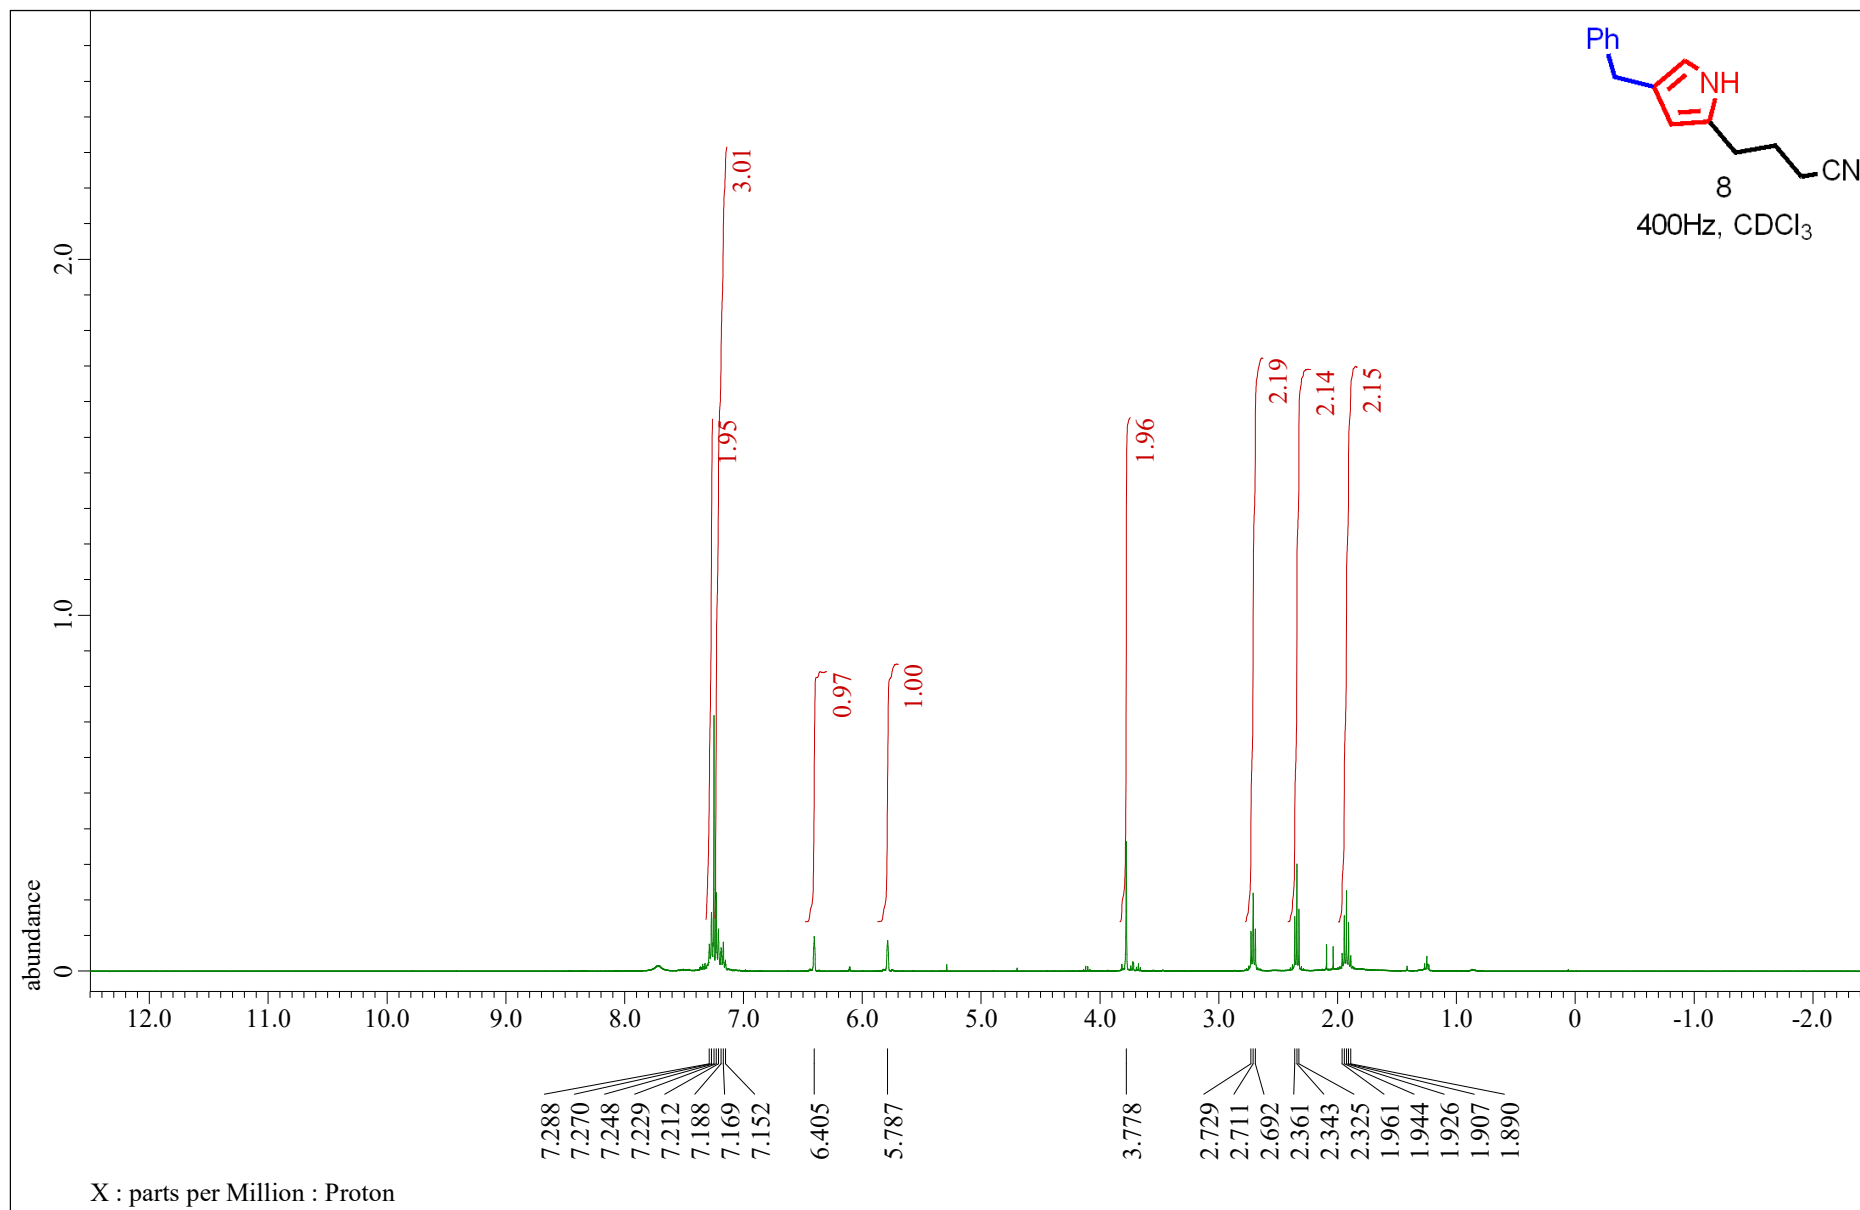

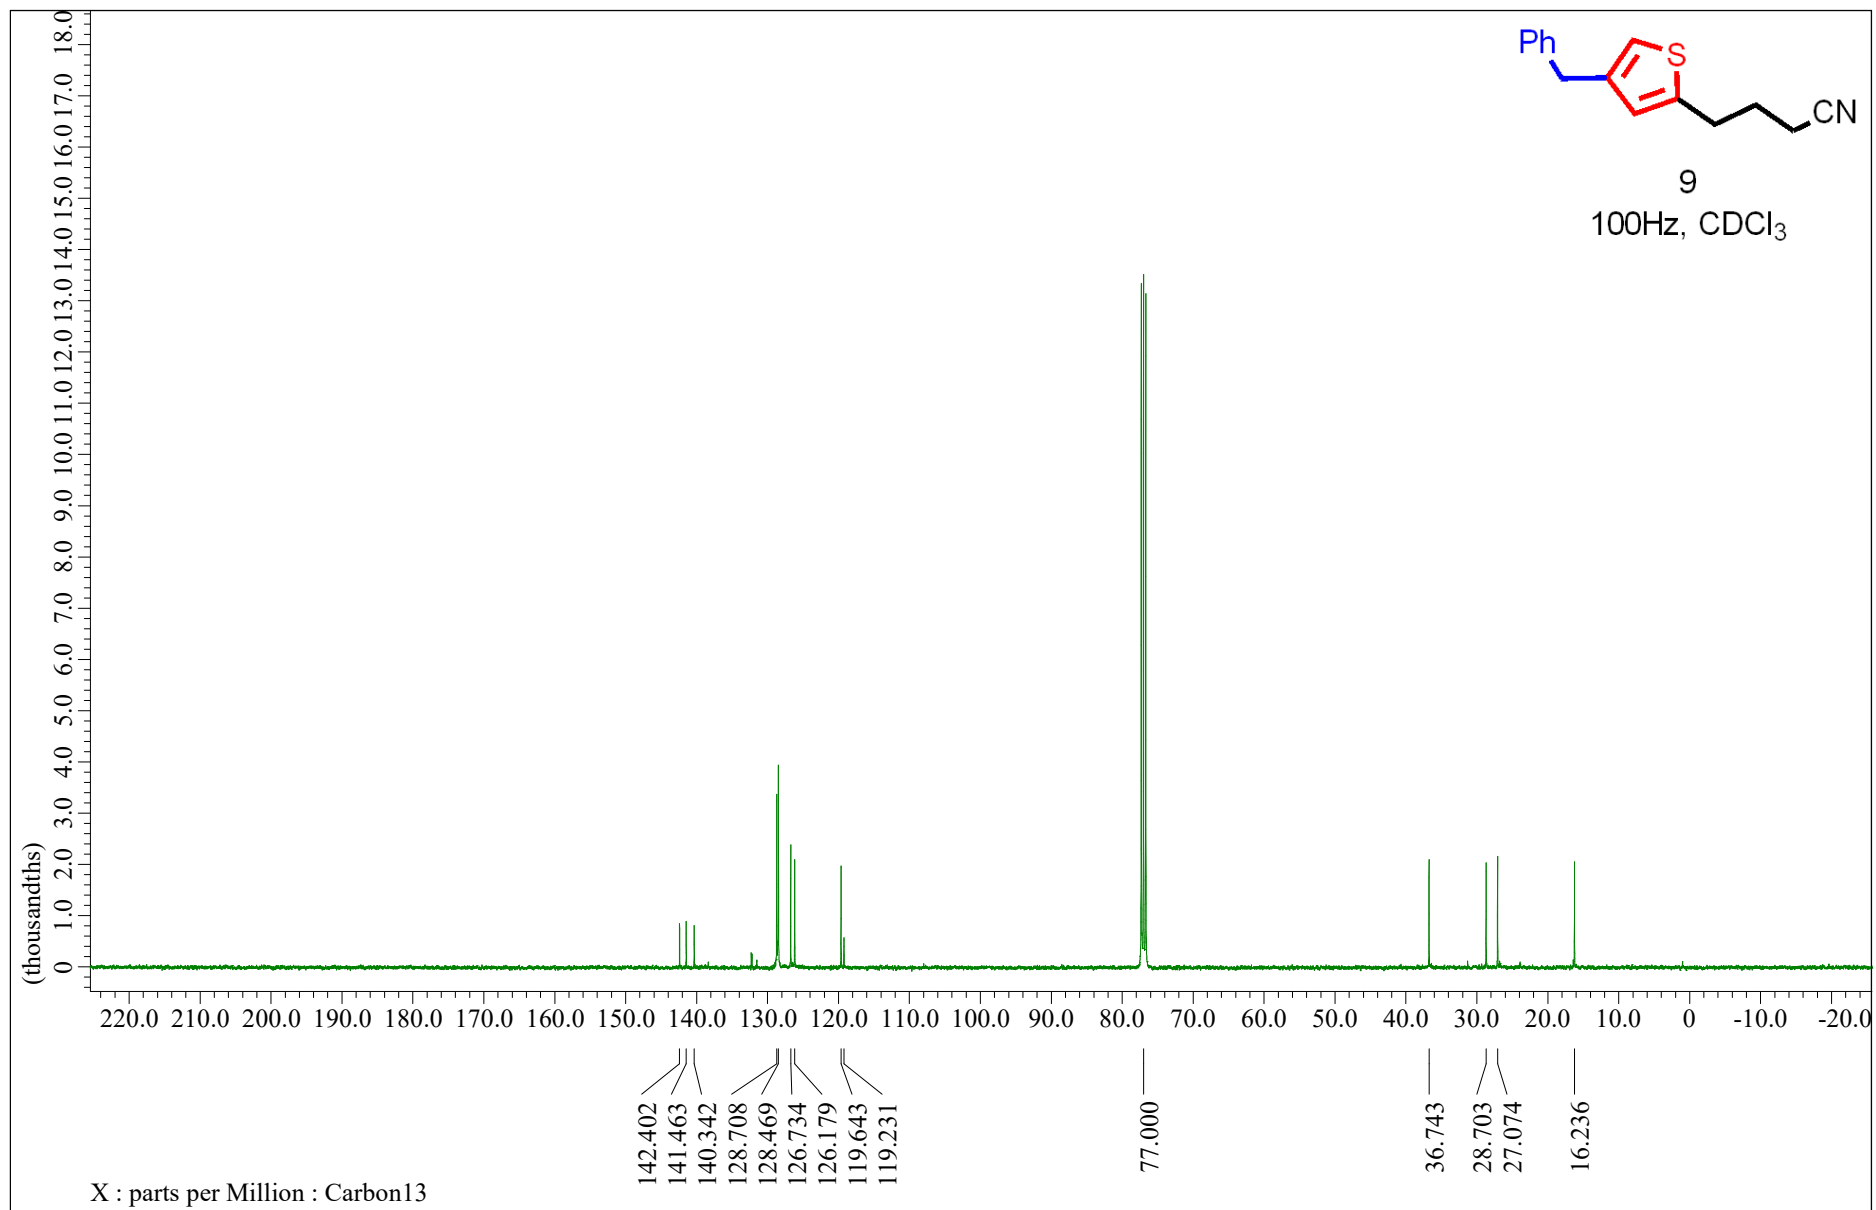



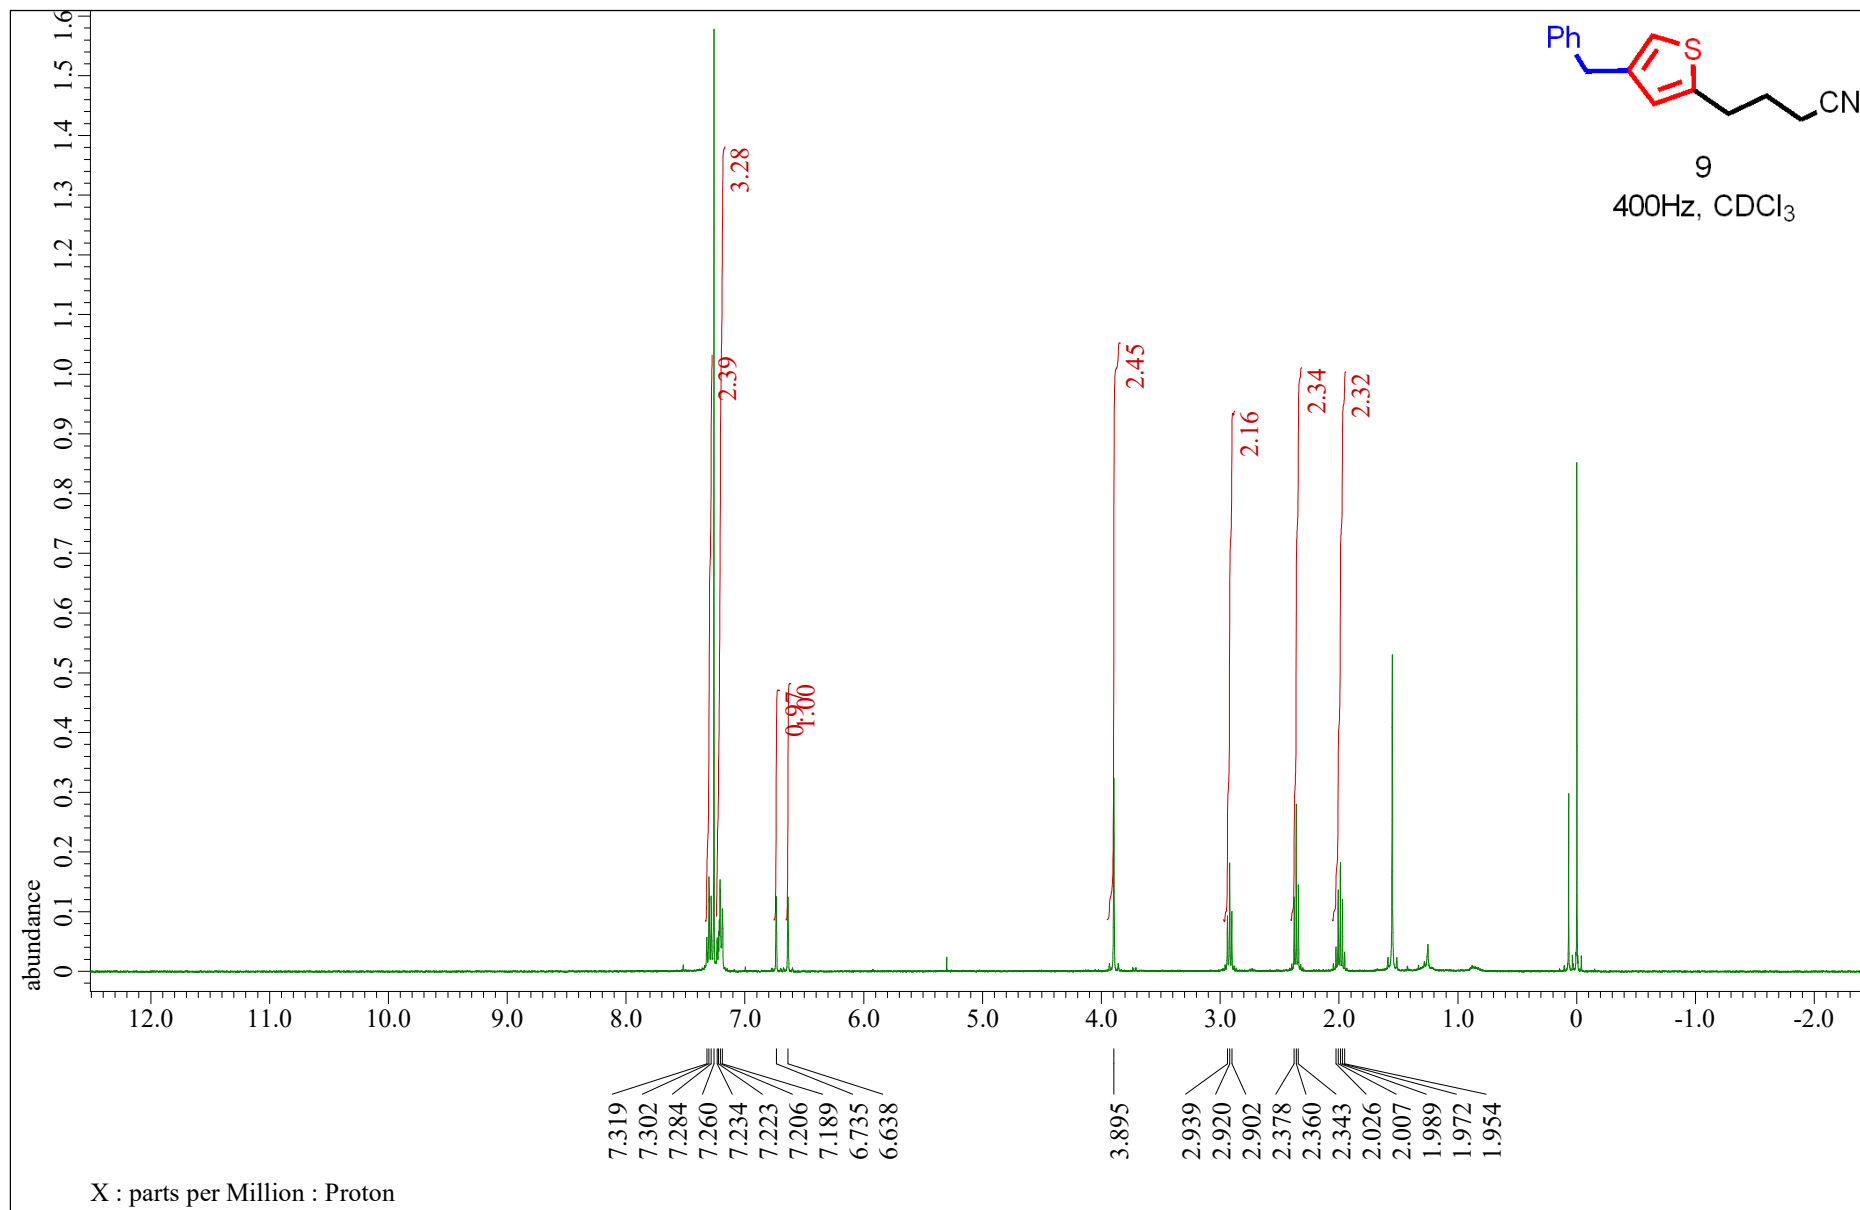

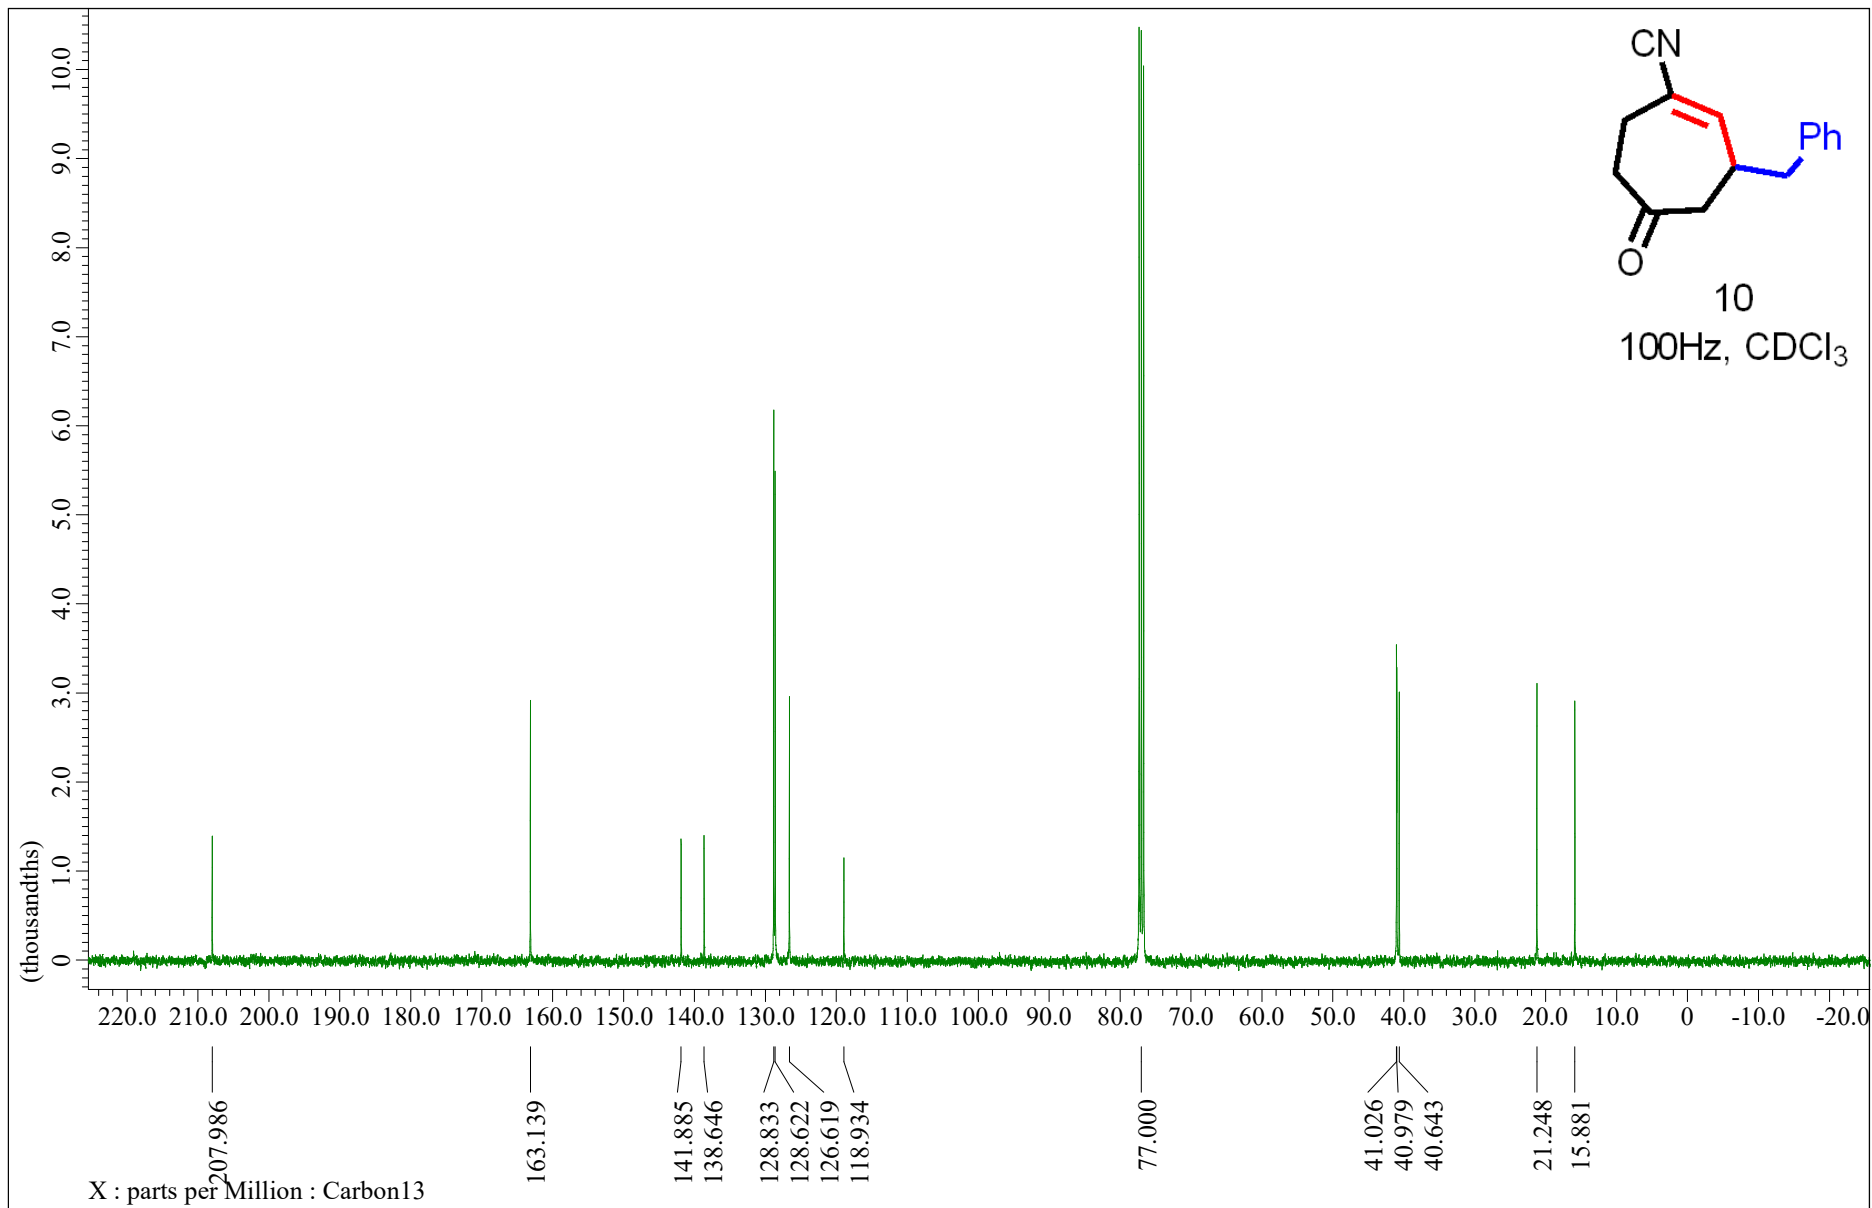

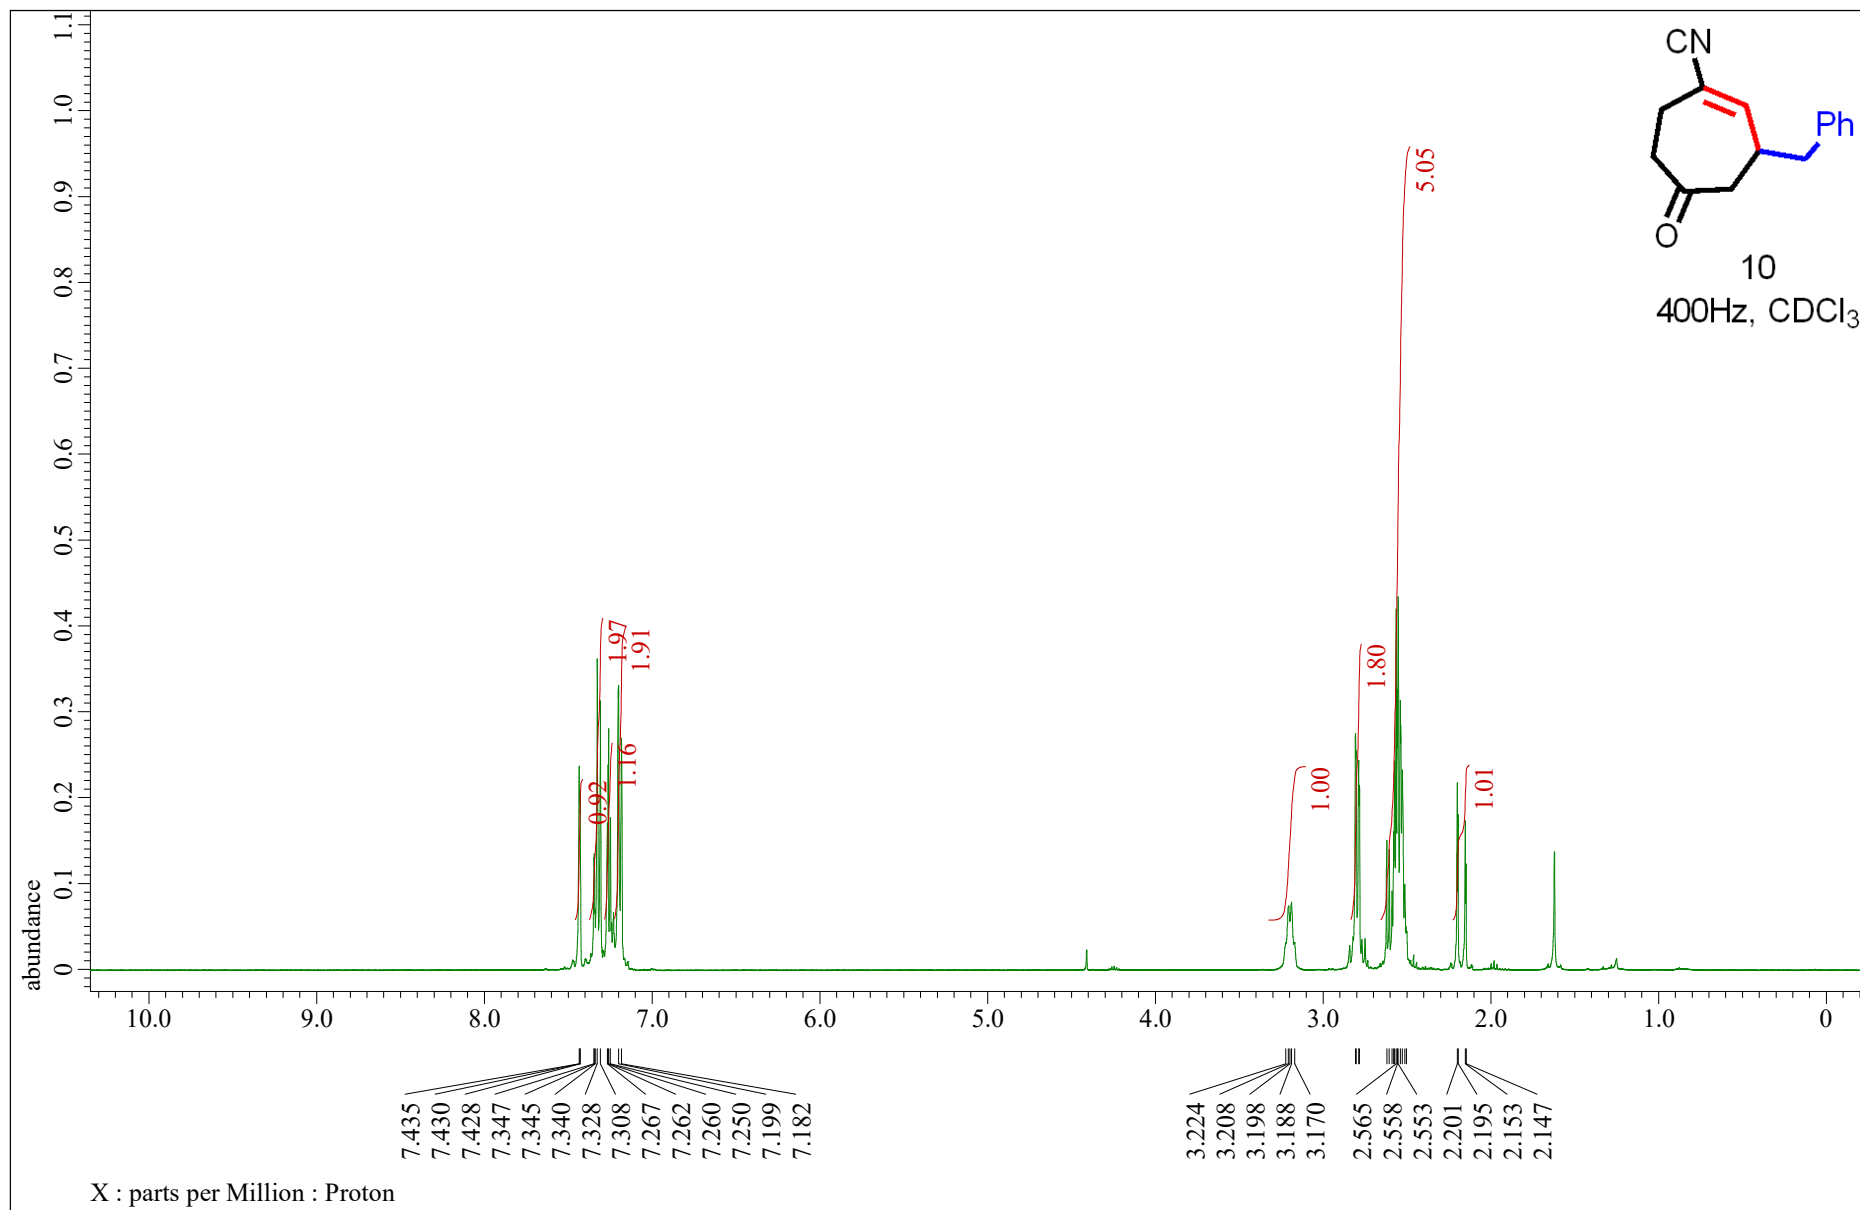

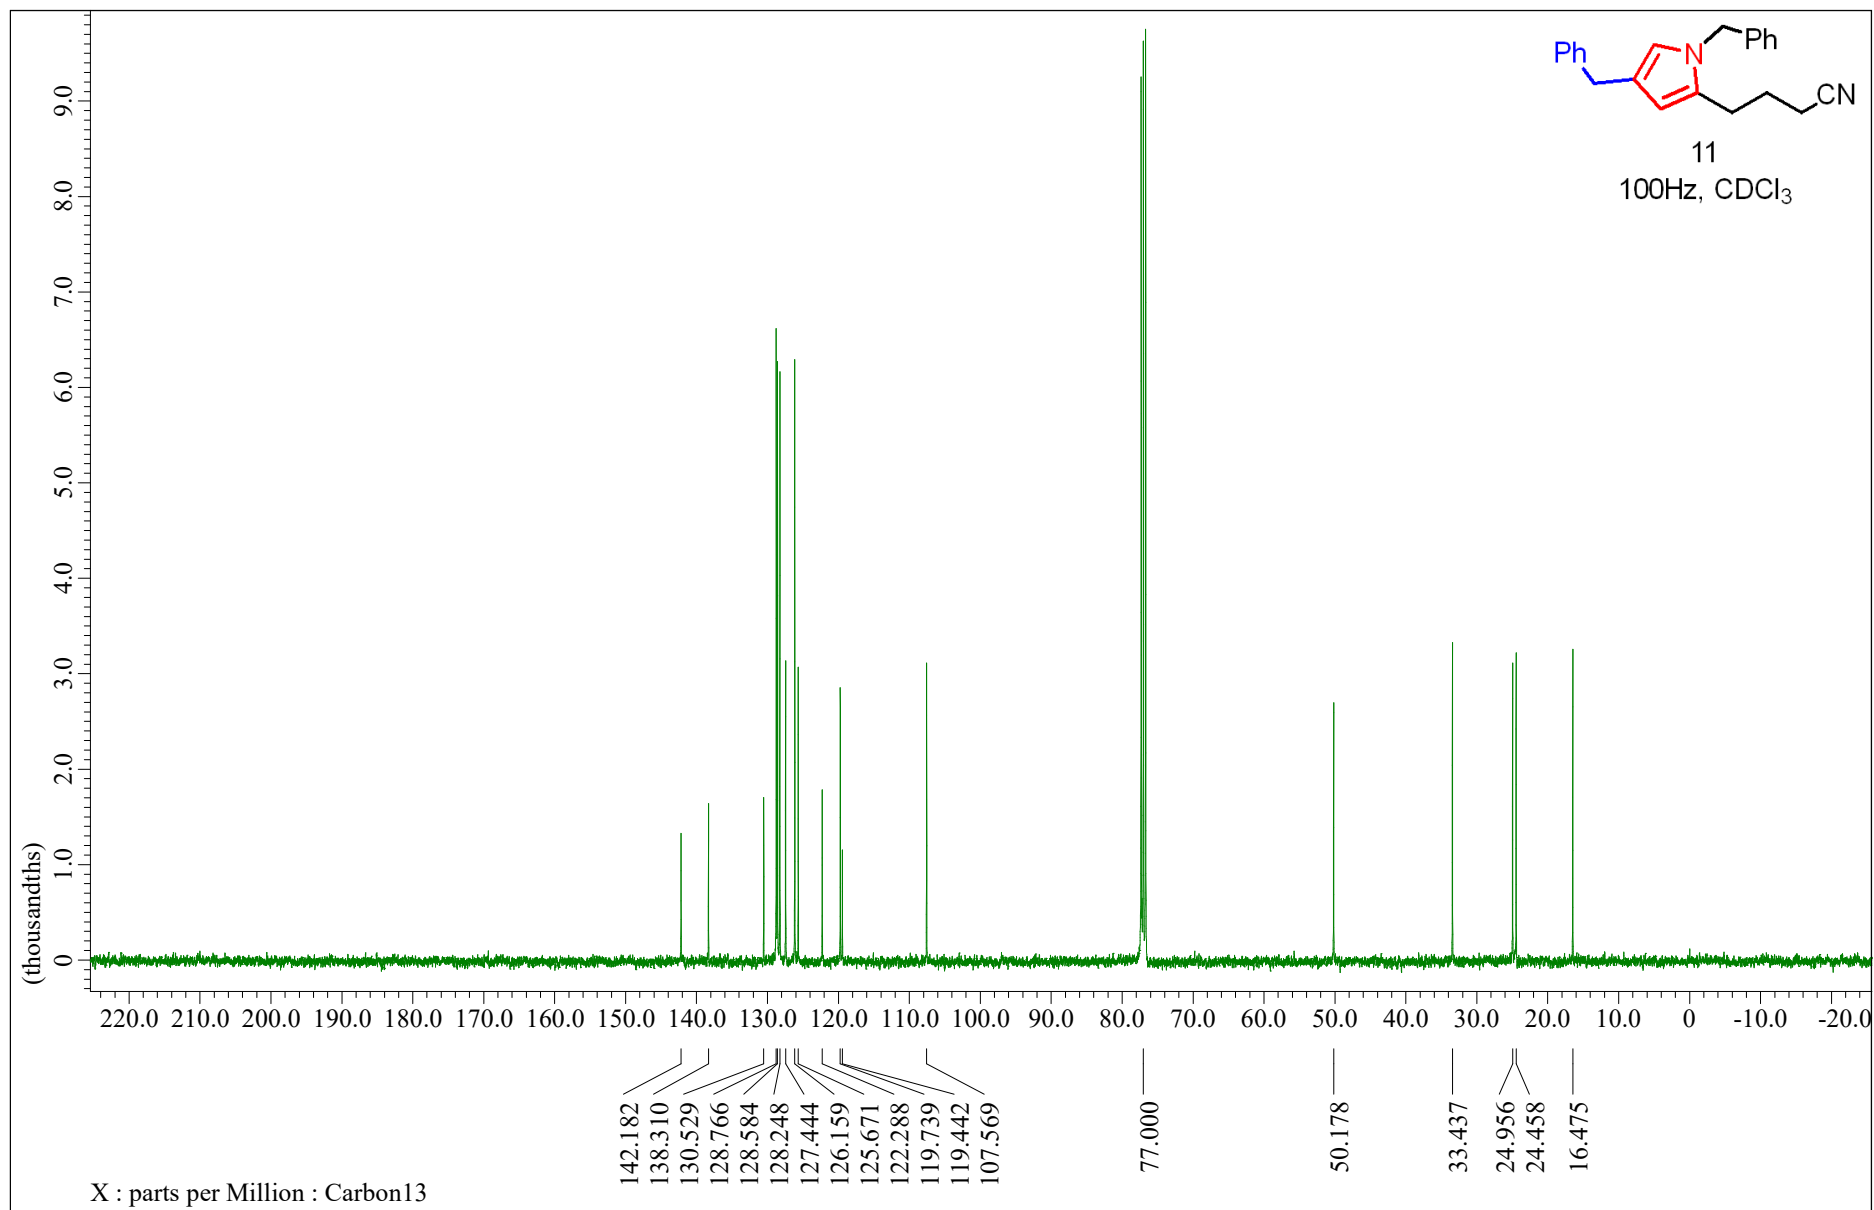

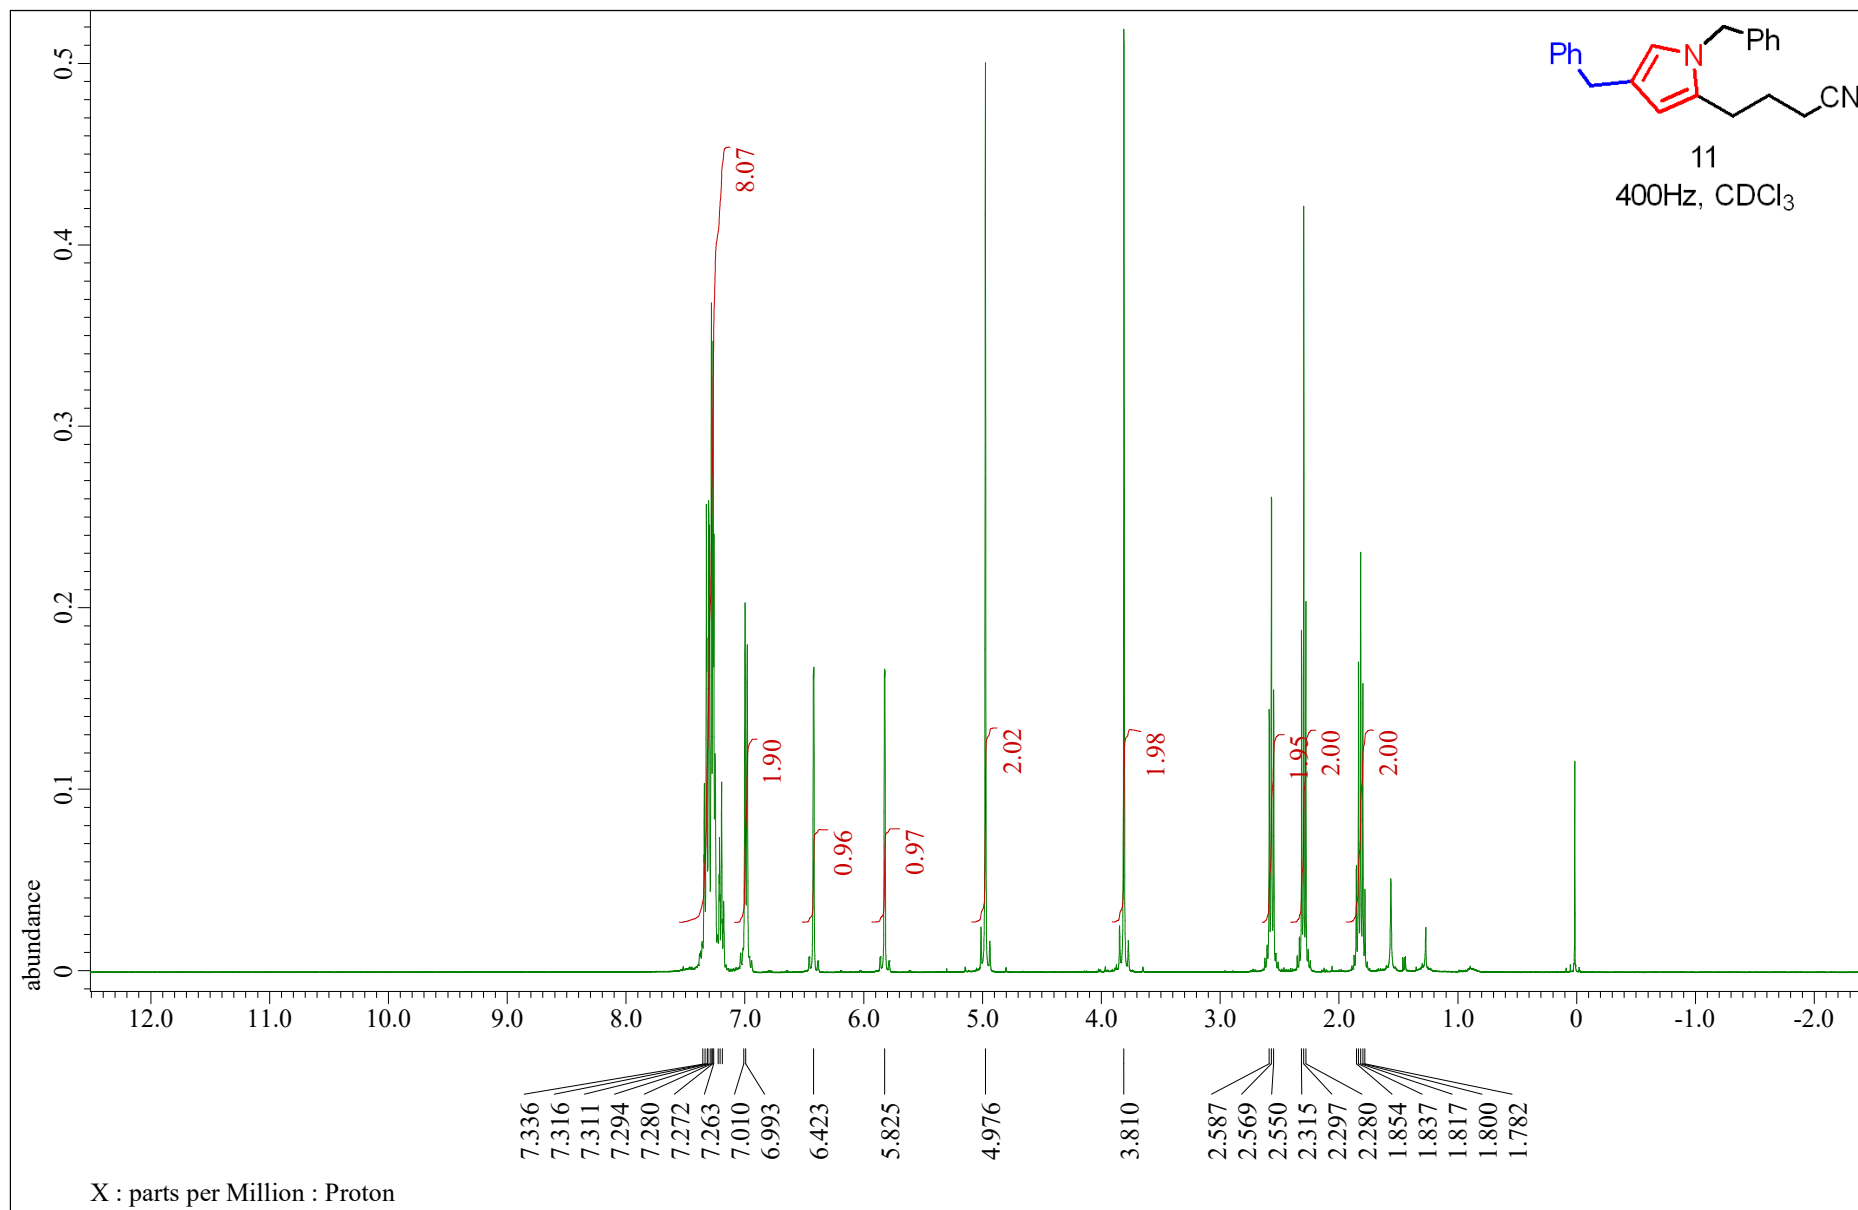

Supplement: d3cc00422h1.pdf [file d3cc00422h1.pdf]
